# **Impaired glucose tolerance and cardiovascular risk factors in relation to infertility: a Mendelian randomization analysis in the Norwegian Mother, Father and Child Cohort Study**

**Running title:** Cardiometabolic risk factors and infertility

Álvaro Hernáez<sup>1,2,\*</sup>, Yunsung Lee<sup>1</sup>, Christian M. Page<sup>1,3</sup>, Karoline H. Skåra<sup>1,4</sup>, Siri E. Håberg<sup>1</sup>, Per Magnus<sup>1</sup>, Pål R. Njølstad<sup>5,6</sup>, Ole A. Andreassen<sup>7,8</sup>, Elizabeth C. Corfield<sup>9,10</sup>, Alexandra Havdahl<sup>9,10,11,12,13</sup>, Abigail Fraser<sup>12,13</sup>, Stephen Burgess<sup>14,15</sup>, Deborah A. Lawlor<sup>12,13,16</sup>, Maria C. Magnus<sup>1,12,13</sup>

1. Centre for Fertility and Health, Norwegian Institute of Public Health, Oslo, Norway.
2. Blanquerna School of Health Sciences, Universitat Ramon Llull, Barcelona, Spain.
3. Department of Physical Health and Ageing, Division for Mental and Physical Health, Norwegian Institute of Public Health, Oslo, Norway.
4. Department of Community Medicine and Global Health, Institute of Health and Society, University of Oslo, Oslo, Norway
5. Mohn Center for Diabetes Precision Medicine, Department of Clinical Science, University of Bergen, Bergen, Norway
6. Children and Youth Clinic, Haukeland University Hospital, Bergen, Norway
7. Norwegian Centre for Mental Disorders Research, NORMENT, Division of Mental Health and Addiction, Oslo University Hospital, Oslo, Norway
8. Institute of Clinical Medicine, University of Oslo, Oslo, Norway
9. Department of Mental Disorders, Norwegian Institute of Public Health, Oslo, Norway
10. Nic Waals Institute, Lovisenberg Diakonale Hospital, Oslo, Norway
11. PROMENTA Research Center, Department of Psychology, University of Oslo, Oslo, Norway
12. Population Health Sciences, Bristol Medical School, University of Bristol, Bristol, UK.

NOTE: This preprint reports new research that has not been certified by peer review and should not be used to guide clinical practice.

13. MRC Integrative Epidemiology Unit at the University of Bristol, Bristol, UK.
14. MRC Biostatistics Unit, University of Cambridge, Cambridge, UK.
15. Cardiovascular Epidemiology Unit, Department of Public Health and Primary Care,  
University of Cambridge, Cambridge, UK.
16. NIHR Bristol Biomedical Research Centre, Bristol, UK

**Corresponding author:**

Alvaro Hernaez, PharmD, PhD

Centre for Fertility and Health, Norwegian Institute of Public Health

PO 222 Skøyen, 0213 Oslo, Norway

Telephone: (+47) 95523951

e-mail: [alvaro.hernaez@fhi.no](mailto:alvaro.hernaez@fhi.no)

ORCID: 0000-0001-8593-1477

**Word count:** 1,499

1 **ABSTRACT**

2

3 **Aims/hypothesis.** Observational evidence suggests a shared etiology between impaired  
4 glucose tolerance, cardiovascular risk, and fertility problems. We aim to establish whether  
5 impaired glucose tolerance (as measured by fasting glucose, glycated hemoglobin, and  
6 fasting insulin) and cardiovascular disease risk (as measured by LDL cholesterol, HDL  
7 cholesterol, triglycerides, systolic blood pressure, and diastolic blood pressure) are causally  
8 related to infertility (having tried to conceive for  $\geq 12$  months or used assisted reproduction  
9 technologies to conceive) by Mendelian randomization (MR) analyses in women and men.

10 **Methods.** We conducted two-sample MR analyses, in which we used genome-wide  
11 association summary data that were publicly available for the cardiometabolic risk factors,  
12 and sex specific genome-wide association studies of infertility conducted in the Norwegian  
13 Mother, Father, and Child Cohort Study (68,882 women [average age 30, involved in 81,682  
14 pregnancies] and 47,474 of their male partners [average age 33, 55,744 pregnancies]). We  
15 applied the inverse variance weighted method with random effects to pool data across  
16 variants and a series of sensitivity analyses to explore genetic instrument validity (we  
17 checked the robustness of genetic instruments and the lack of unbalanced horizontal  
18 pleiotropy, and we used methods that are robust to population stratification). Findings were  
19 corrected for multiple comparisons by the Bonferroni method (8 exposures:  $p$ -value <  
20 0.00625).

21 **Results.** In women, increases in genetically determined fasting insulin levels were  
22 associated with greater odds of infertility (+1 log(pmol/L): OR 1.60, 95% CI 1.17 to 2.18,  $p$ -  
23 value = 0.003). The results were robust in the sensitivity analyses exploring the validity of MR  
24 assumptions and the role of pleiotropy of other cardiometabolic risk factors. There was also  
25 evidence of higher glucose and glycated hemoglobin in women (and possibly higher fasting  
26 insulin in men) causing infertility, but findings were imprecise and did not pass our  $p$ -value  
27 threshold for multiple testing. Results for lipids and blood pressure were close to the null,  
28 suggesting that these did not cause infertility.

29 **Conclusions/interpretation.** Genetic instruments suggest that higher fasting insulin may  
30 increase infertility in women.

31

32

33 **TWEET**

34 Mendelian randomization suggests that higher fasting #insulin levels increase the risk of  
35 #infertility in women. @alvaro\_hernaez @theCEFH @Folkehelseinst @ERC\_Research  
36 #MendelianRandomization

37

38

39 **KEYWORDS**

40 Fasting insulin, glucose metabolism, blood pressure, lipid profile, infertility, Mendelian  
41 randomization, MoBa.

42

43

44 **ABBREVIATIONS**

45 DBP: diastolic blood pressure

46 GWAS: genome-wide association study

47 HDL-C: high-density lipoprotein cholesterol

48 LDL-C: low-density lipoprotein cholesterol

49 MoBa: Mother, Father and Child Cohort Study

50 MR: Mendelian randomization

51 SBP: systolic blood pressure

52 **RESEARCH IN CONTEXT** (<200 words)

53

54 **What is already known about this subject?**

- 55 • Observational evidence suggests impaired glucose tolerance, higher lipid  
56 concentrations, and higher blood pressure is associated with fertility problems.

57

58 **What is the key question?**

- 59 • Are fasting glucose, glycated hemoglobin, fasting insulin, LDL cholesterol, HDL  
60 cholesterol, triglycerides, systolic blood pressure, and diastolic blood pressure  
61 causally related to infertility in women and men?

62

63 **What are the new findings?**

- 64 • Two-sample Mendelian randomization suggests that higher fasting insulin levels  
65 increase the risk of infertility in women. There was also evidence of higher glucose  
66 and glycated hemoglobin in women (and maybe higher fasting insulin in men)  
67 causing infertility, but results were imprecise and did not pass our  $p$ -value threshold  
68 for multiple comparisons.
- 69 • Findings for lipids and blood pressure were close to the null, suggesting that these  
70 did not have a causal role on infertility.

71

72 **How might this impact on clinical practice in the foreseeable future?**

- 73 • Treatments to lower fasting insulin levels may reduce the risk of infertility in women.

74 **INTRODUCTION**

75

76 Impaired glucose tolerance and other cardiovascular risk factors are related to fertility  
77 problems in women [1, 2] and men [3]. However, these associations may be explained by  
78 unmeasured or residual confounding (e.g., adiposity) [4]. Mendelian randomization (MR), a  
79 method based on genetic instrumental variables, estimates potential causal effects that are  
80 unaffected by confounding [4]. Using this methodology, we have previously described that  
81 high and low body weight increase the risk of infertility in both sexes [5], while the previously  
82 reported association between smoking and infertility may not be causal [6]. The aim of this  
83 study was to investigate whether biomarkers of impaired glucose tolerance (fasting glucose,  
84 glycated hemoglobin, fasting insulin) and cardiovascular disease risk factors (LDL cholesterol  
85 [LDL-C], HDL cholesterol [HDL-C], triglycerides, systolic and diastolic blood pressure [SBP,  
86 DBP]) influence the risk of infertility using a two-sample MR-based approach.

87 **METHODS**

88

89 *Population*

90 Our study involved data from the Norwegian Mother, Father and Child Cohort Study (MoBa)  
91 [7]. MoBa is a population-based pregnancy cohort study administered by the Norwegian  
92 Institute of Public Health. Pregnant women and their partners were recruited at ~18  
93 gestational weeks across Norway between 1999-2008. The cohort is composed by 114,500  
94 children, 95,200 mothers and 75,200 fathers. Blood samples were obtained from both  
95 parents during pregnancy [8]. Details of the MoBa genotyping data and quality control have  
96 been previously described [9]. This work is based on a subsample of parents involved in  
97 singleton pregnancies with available genotype and infertility information (68,882 women and  
98 47,474 men) from version 12 of the quality-assured data files released in May 11, 2022. Our  
99 study followed the STROBE checklists for MR and cohort studies.

100

101 *Genetic variants and instrumental variables*

102 We extracted independent SNPs as genetic instruments from the most recent genome-wide  
103 association studies (GWASs) on risk factors of impaired glucose metabolism, lipid profile,  
104 and blood pressure (see “Data Availability”). Independent SNPs were not in linkage  
105 disequilibrium (pairwise  $r^2 < 0.01$ ) and were associated with their phenotypes according to  
106 genome-wide significance thresholds. MoBa was not part in any of these GWASs. We used  
107 SNPs individually as genetic instruments [10]. SNPs that were used in the analyses are  
108 described in **Supplemental Tables 1-8**. The number of SNPs used in each approach is  
109 described in **Supplemental Table 9**.

110

111 *Infertility*

112 Infertility was defined as trying to conceive for  $\geq 12$  months or having used assisted  
113 reproductive technologies as previously described [5, 6]. The reference group comprised

114 participants who conceived spontaneously within 12 months. Couples with unplanned  
115 pregnancies were excluded.

116

#### 117 *Other variables*

118 We obtained information from both parents on the age at delivery (continuous), years of  
119 education (continuous), BMI (continuous), tobacco use (having ever smoked or not), and  
120 number of previous deliveries (continuous). We report the maximum values for all continuous  
121 variables for those parents who participated in more than one pregnancy in MoBa.

122

#### 123 *Ethical approval*

124 The MoBa study follows the Declaration of Helsinki for Medical Research involving human  
125 subjects. The establishment of MoBa and its initial data collection were based on a license  
126 from the Norwegian Data Protection Agency and approved by Regional Committees for  
127 Medical and Health Research Ethics. The MoBa cohort is now based on the regulations in  
128 the Norwegian Health Registry Act. Participants provided written informed consent before  
129 joining the cohort. This project was approved by the Regional Committee for Medical and  
130 Health Research Ethics of South/East Norway (reference: 2017/1362).

131

#### 132 *Statistical analyses*

133 We described normally distributed continuous variables by means and SDs, non-normally  
134 distributed continuous variables by medians and 1<sup>st</sup>-3<sup>rd</sup> quartiles, and categorical variables by  
135 proportions. We assessed differences in baseline characteristics between parents with and  
136 without infertility by unpaired t-tests (normally distributed variables), Mann-Whitney U-tests  
137 (non-normally distributed variables), and chi-squared tests (categorical variables).

138 We first performed sex specific GWASs of infertility in MoBa using Scalable and  
139 Accurate Implementation of GEneralized mixed models (accounting for kinship and adjusted  
140 for the first 20 genetic principal components, genotype batch, and age at reported infertility).  
141 We then searched for the SNPs linked to the cardiometabolic risk factors in the summary



142 statistics of the infertility GWASs. Palindromic SNPs with allele frequencies close to 0.5 were  
143 excluded. After data harmonization, we estimated the association between the risk factor of  
144 interest and infertility using a random effects inverse variance weighted method [10]. We  
145 corrected our findings for multiple comparisons (8 exposures) by the Bonferroni method ( $p$ -  
146 value threshold  $< 0.00625$ ). Finally, the three key MR assumptions that must be met to obtain  
147 valid conclusions in MR analyses [10] (genetic instruments are robustly related to the  
148 exposure, there is no confounding of the genetic instrument-outcome associations, and  
149 genetic instruments are exclusively linked to the outcome through the exposure of interest)  
150 were investigated in detail as described in the **Supplemental Methods**.

151 Analyses were conducted in R Software v. 4.1.2. Code for data management and  
152 analysis is available in  
153 [https://github.com/alvarohernaez/MR\\_cardiometabolic\\_infertility\\_MoBa](https://github.com/alvarohernaez/MR_cardiometabolic_infertility_MoBa).

154 **RESULTS**

155

156 *Study population*

157 Our study population consisted of 68,882 women (a total of 81,682 pregnancies) and 47,474  
 158 men (55,744 pregnancies) (**Supplemental Figure 1**). Infertility was reported in 12% of the  
 159 couples. Participants with infertility were older, had lower educational attainment, greater  
 160 mean BMI values, were more likely to have smoked, and were more likely to be trying for a  
 161 first pregnancy (**Table 1**).

162

163 **Table 1.** Population characteristics

|                                                                               | Women               |                                            |                                        | Men                 |                                            |                                        |
|-------------------------------------------------------------------------------|---------------------|--------------------------------------------|----------------------------------------|---------------------|--------------------------------------------|----------------------------------------|
|                                                                               | All<br>(n = 68,882) | No infertility<br>reported<br>(n = 60,532) | Infertility<br>reported<br>(n = 8,350) | All<br>(n = 47,474) | No infertility<br>reported<br>(n = 41,624) | Infertility<br>reported<br>(n = 5,850) |
| Age at delivery,<br>years (mean ± SD)                                         | 30.5 ± 4.61         | 30.3 ± 4.58                                | 32.1 ± 4.47                            | 32.9 ± 5.27         | 32.6 ± 5.21                                | 34.6 ± 5.38                            |
| Education years<br>(mean ± SD)                                                | 17.1 ± 3.35         | 17.1 ± 3.34                                | 16.9 ± 3.39                            | 16.4 ± 3.55         | 16.4 ± 3.54                                | 16.1 ± 3.57                            |
| BMI, kg/m <sup>2</sup> (median,<br>1 <sup>st</sup> -3 <sup>rd</sup> quartile) | 23.2<br>(21.2-26.1) | 23.1<br>(21.1-26.0)                        | 23.9<br>(21.5-27.4)                    | 25.5<br>(23.7-27.8) | 25.5<br>(23.7-27.7)                        | 25.9<br>(24.1-28.3)                    |
| Ever smokers<br>(n, %):                                                       | 35,632<br>(52.3%)   | 31,247<br>(52.3%)                          | 4,385<br>(53.0%)                       | 24,299<br>(51.2%)   | 21,232<br>(51.0%)                          | 3,067<br>(52.4%)                       |
| Trying for a first<br>pregnancy (n, %):                                       | 27,030<br>(39.3%)   | 23,290<br>(38.6%)                          | 3,740<br>(44.9%)                       | 20,026<br>(42.3%)   | 17,212<br>(41.4%)                          | 2,814<br>(48.2%)                       |

164

165 *Cardiometabolic risk factors and infertility*

166 In women, increases in the genetically determined levels of fasting insulin were related to  
 167 greater odds of infertility (+1 log(pmol/L): OR 1.60, 95% CI 1.17 to 2.18, *p*-value = 0.003)

168 **(Figure 1)**. We found no evidence that this result was affected by weak instrument bias  
 169 (estimated F-statistic: 52.5) or unbalanced horizontal pleiotropy (MR-Egger intercept test  $p$ -  
 170 value = 0.194; no evidence of between-SNP heterogeneity [Cochran's Q = 55.8,  $p$ -value =  
 171 0.445; Rucker's Q' = 54.1,  $p$ -value = 0.472]; consistency in directionality of estimates in MR  
 172 sensitivity methods; consistency between main analyses and those only using the genetic  
 173 variants that were unrelated to other risk factors according to the Steiger filtering)  
 174 **(Supplemental Table 10)**. Associations of higher maternal fasting glucose and glycated  
 175 hemoglobin in women (and maybe fasting insulin in men) with greater infertility odds were  
 176 suggested. However, these relationships were imprecise and did not pass our multiple  
 177 testing  $p$ -value threshold. Lipid and blood pressure associations with infertility were close to  
 178 the null **(Figure 1, Supplemental Table 10)**.

179

180 **Figure 1.** MR analyses on the relationship of cardiometabolic risk factors with infertility in  
 181 women and men (units differ for each exposure, results are not directly comparable in  
 182 magnitude).

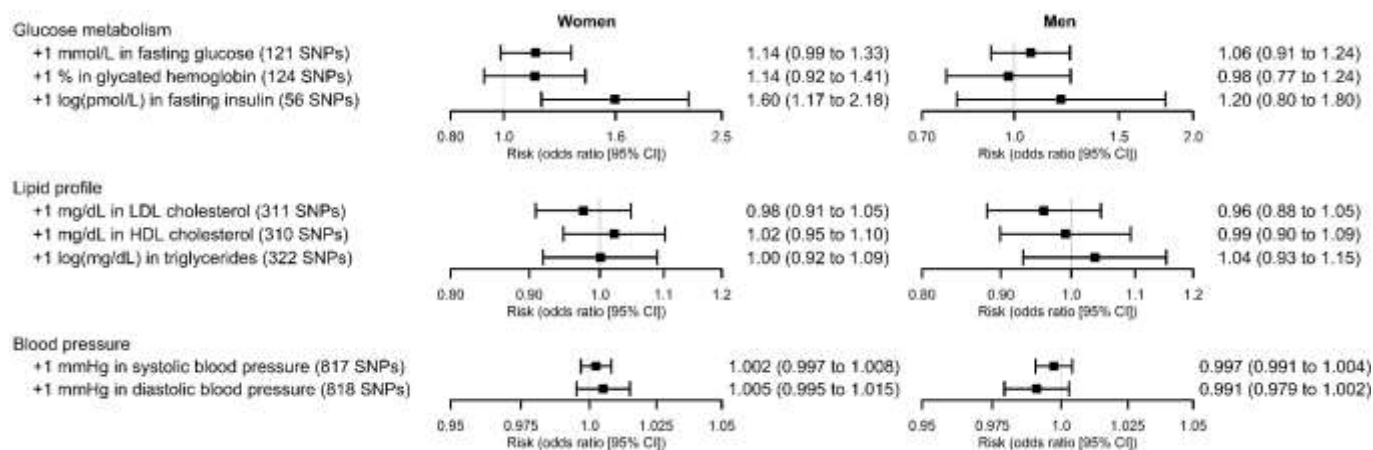

183

184 **DISCUSSION**

185

186 In this MR analysis, genetic instruments suggest that higher concentrations of fasting insulin  
187 increase the risk of infertility in women. An association between higher fasting glucose and  
188 glycated hemoglobin in women (and maybe higher fasting insulin in men) and higher risk of  
189 infertility is also suggested but analyses in larger numbers of participants are needed to  
190 confirm this. Hyperinsulinemia, a marker of insulin resistance, and glucose intolerance are  
191 common in women with polycystic ovary syndrome, which is a cause of infertility [11].  
192 Hyperinsulinemia is also linked to follicular dysplasia and impaired synthesis of sexual  
193 hormones in the follicle (less progesterone, lower availability of follicle stimulating hormone,  
194 and more androgens) [12, 13]. Our findings support hyperinsulinemia as a cause of infertility  
195 in women. The lack of robust statistical evidence for an effect of lipids and blood pressure on  
196 infertility suggests that previous observational results [1-3] may have been influenced by  
197 residual confounding.

198 Our work has several strengths. MR studies exploring the relationship between  
199 cardiometabolic risk factors and a clinical definition of fertility have been lacking. Our findings  
200 were based on a relatively homogeneous population, and together with a thorough  
201 evaluation of compliance with MR assumptions, our findings appear robust. However, our  
202 study has some limitations. First, infertility is a couple-dependent measure. Thus, we could  
203 not establish if underlying causes of infertility were in the woman, man, or both. Second,  
204 MoBa only recruited couples who had conceived. Therefore, studies with couples who never  
205 conceived are warranted. Third, we did not have data on circulating levels of cardiometabolic  
206 risk factors in MoBa and there was no GWAS of infertility with available summary data  
207 across the genome. Thus, we opted to undertake a GWAS of infertility in MoBa (with no  
208 independent replication) and a two-sample MR using summary results from publicly available  
209 GWAS of the exposures and those from our MoBa GWAS. Our outcome GWAS is relatively  
210 small. Thus, we have highlighted some suggested results that were clinically relevant but did  
211 not pass multiple testing. Our findings need replication in two-sample MR using results from

212 a larger GWAS of infertility and/or a large independent sample in which one-sample MR  
213 could be undertaken. Fourth, no sex-specific genetic instruments were available in the  
214 largest GWASs on cardiometabolic risk factors, and we had to assume that there were no  
215 sex differences in the genetic instruments for exposures. However, this assumption may  
216 imply a violation of the first MR principle. Finally, the characteristics of our study sample  
217 limits the generalizability of our results to other populations, particularly to populations of  
218 genetic ancestries other than European.

219 In conclusion, genetic instruments suggest a role of hyperinsulinemia and possibly  
220 glucose intolerance on infertility in women. If further research in larger samples and with sex-  
221 specific exposure instruments support our findings, preventing hyperinsulinemia may be a  
222 means of reducing fertility problems in women.

223 **Acknowledgements**

224

225 The MoBa Cohort Study is supported by the Norwegian Ministry of Health and Care Services  
226 and the Ministry of Education and Research. We are grateful to all the families in Norway  
227 who take part in this cohort study, those who contributed to the recruitment, and the  
228 infrastructure surrounding the MoBa cohort.

229 We thank Per Magnus, Pål R. Njølstad, Ole Andreassen, and the Norwegian Institute  
230 of Public Health for generating high-quality genomic data. This research is part of the  
231 HARVEST collaboration, supported by the Research Council of Norway (#229624). We also  
232 thank the NORMENT Centre for providing genotype data, funded by the Research Council of  
233 Norway (grant #223273), South East Norway Health Authority, Stiftelsen Kristian Gerhard  
234 Jebsen, and deCODE Genetics. We further thank the Center for Diabetes Research  
235 (University of Bergen) for providing genotype information and performing quality control and  
236 imputation of the data, in the context of research projects funded by the European Research  
237 Council Advanced Grant SELECTIONPREDISPOSED (#293574), Stiftelsen Kristian Gerhard  
238 Jebsen (Translational Medical Center), the Trond Mohn Foundation, the Research Council of  
239 Norway (FRIPRO grant #240413), the Novo Nordisk Foundation (grant #54741), the Bergen  
240 Research Foundation (“Utilizing the Mother and Child Cohort and the Medical Birth Registry  
241 for Better Health”), the University of Bergen, the Western Norway Health Authority (Strategic  
242 Fund “Personalized Medicine for Children and Adults”), and the Norwegian Diabetes  
243 Association.

244 This work was performed on the TSD (Tjeneste for Sensitive Data) facilities, owned  
245 by the University of Oslo, which are operated and developed by the TSD service group at the  
246 IT-Department in the University of Oslo ([tsd-drift@usit.uio.no](mailto:tsd-drift@usit.uio.no)).

247

248

249 **Data availability**

250

251 The consent given by the participants does not allow for storage of individual data in  
252 repositories or journals. Researchers who want access to data sets for replication should  
253 apply through [datatilgang@fhi.no](mailto:datatilgang@fhi.no). This process requires approval from the Regional  
254 Committee for Medical and Health Research Ethics in Norway and an agreement with MoBa.  
255 GWAS summary statistics on fasting glucose, glycated hemoglobin, and fasting insulin have  
256 been contributed by the Meta-Analyses of Glucose and Insulin-related traits Consortium  
257 investigators and have been downloaded from <https://magicinvestigators.org/downloads/>  
258 (menu: “Trans-ancestry and single-ancestry meta-analysis summary statistics of four  
259 glycemic traits”). GWAS summary statistics on lipid profile traits have been contributed by the  
260 Global Lipids Genetics Consortium investigators and have been downloaded from  
261 <http://csg.sph.umich.edu/willer/public/qlgc-lipids2021/> (menu: “Ancestry-specific GWAS  
262 summary statistics for HDL-C, LDL-C, nonHDL-C, TC and TG”). Finally, GWAS summary  
263 statistics on blood pressure have been contributed by Evangelou E et al. and have been  
264 downloaded from the Supplemental Tables of the article  
265 (<https://www.nature.com/articles/s41588-018-0205-x#MOESM3>).

266

267

## 268 **Funding**

269

270 The MoBa Cohort Study is supported by the Norwegian Ministry of Health and Care Services  
271 and the Norwegian Ministry of Education and Research. This project received funding from  
272 the European Research Council under the European Union’s Horizon 2020 research and  
273 innovation program (grant agreement No 947684). This work was also partly supported by  
274 the Research Council of Norway through its Centres of Excellence funding scheme, project  
275 number 262700, and the project “Women’s fertility – an essential component of health and  
276 well-being”, number 320656, and co-funded by the European Research Council (grant  
277 agreement No 101071773). Open Access funding was provided by the Norwegian Institute of  
278 Public Health. P.R.N. was supported by the European Research Council (grant agreement

279 No 293574). E.C. and A.Havdahl were supported by the Research Council of Norway  
280 (274611) and the South-Eastern Norway Regional Health Authority (project numbers  
281 2020022, 2021045). D.A.L. is a UK National Institute for Health Research Senior Investigator  
282 (NF-SI-0611–10196) and was supported by the British Heart Foundation (CH/F/20/90003  
283 and AA/18/1/34219) and the European Research Council (grant agreement No 101021566).  
284 The funders had no role in the study design; the collection, analysis, and interpretation of  
285 data; in the writing of the report; or in the decision to submit the article for publication. Views  
286 and opinions expressed in this paper are those of the authors only and do not necessarily  
287 reflect those of the funders. Neither the European Union nor the granting authority can be  
288 held responsible for them.

289

290

#### 291 **Authors' relationships and activities**

292

293 D.A.L. receives (or has received in the last 10 years) research support from National and  
294 International government and charitable bodies, Roche Diagnostics and Medtronic for  
295 research unrelated to the current work. O.A.A. is or has been in the last 10 years consultant  
296 to HealthLytix. The rest of the authors declare that no competing interests exist.

297

298

#### 299 **Contribution statement**

300

301 A.Hernaes was responsible for data curation, formal analyses, data interpretation, and  
302 drafting the article. Y.L. performed data analyses (the temporary GWAS on infertility in  
303 MoBa) and critically revised the article. C.M.P. provided support in data analysis, software  
304 use, and visualization of results, and critically revised the article. K.H.S. provided support in  
305 data analysis, software use, and visualization of results, and critically revised the article.  
306 S.E.H. contributed to data acquisition, obtained funding, and critically revised the article. P.M.



307 contributed to data acquisition and critically revised the article. P.R.N. contributed to data  
308 acquisition and critically revised the article. O.A.A. contributed to data acquisition and  
309 critically revised the article. E.C. contributed to data acquisition and critically revised the  
310 article. A.Havdahl contributed to data acquisition and critically revised the article. A.F. was  
311 involved in the definition of the methodology of the study and the interpretation of data and  
312 critically revised the article. S.B. was involved in the definition of the methodology of the  
313 study and the interpretation of data and critically revised the article. D.A.L. was involved in  
314 the definition of the methodology of the study and the interpretation of data and critically  
315 revised the article. M.C.M. conceived and designed the study, obtained funding, coordinated  
316 the project, contributed to data interpretation, and critically revised the article. A.Hernaez and  
317 M.C.M. are the guarantors of this study, accept full responsibility for the work and the  
318 conduct of the study, had access to the data, and controlled the decision to publish.

319 **REFERENCES**

320

321 [1] Mulder CL, Lassi ZS, Grieger JA, et al. (2020) Cardio-metabolic risk factors among  
322 young infertile women: a systematic review and meta-analysis. *Bjog* 127(8): 930-939.

323 10.1111/1471-0528.16171

324 [2] Vatier C, Christin-Maitre S, Vigouroux C (2022) Role of insulin resistance on fertility -  
325 Focus on polycystic ovary syndrome. *Ann Endocrinol (Paris)* 83(3): 199-202.

326 10.1016/j.ando.2022.04.004

327 [3] Keihani S, Hanson B, Hotaling JM (2019) Male factor infertility: an opportunity to  
328 investigate individual and family health. *Bjog* 126(2): 149-151. 10.1111/1471-0528.15398

329 [4] Davey Smith G, Hemani G (2014) Mendelian randomization: genetic anchors for  
330 causal inference in epidemiological studies. *Hum Mol Genet* 23(R1): R89-98.

331 10.1093/hmg/ddu328

332 [5] Hernaez A, Rogne T, Skara KH, et al. (2021) Body mass index and subfertility:  
333 multivariable regression and Mendelian randomization analyses in the Norwegian Mother,

334 Father and Child Cohort Study. *Hum Reprod*. 10.1093/humrep/deab224

335 [6] Hernández Á, Wootton RE, Page CM, et al. (2022) Smoking and infertility: multivariable  
336 regression and Mendelian randomization analyses in the Norwegian Mother, Father and

337 Child Cohort Study. *Fertility and Sterility*. <https://doi.org/10.1016/j.fertnstert.2022.04.001>

338 [7] Magnus P, Birke C, Vejrup K, et al. (2016) Cohort Profile Update: The Norwegian  
339 Mother and Child Cohort Study (MoBa). *Int J Epidemiol* 45(2): 382-388. 10.1093/ije/dyw029

340 [8] Paltiel L, Haugan A, Skjerden T, et al. (2014) The biobank of the Norwegian Mother  
341 and Child Cohort Study – present status. *Norsk Epidemiologi* 24(1-2): 29-35.

342 10.5324/nje.v24i1-2.1755

343 [9] Corfield EC, Frei O, Shadrin AA, et al. (2022) The Norwegian Mother, Father, and

344 Child cohort study (MoBa) genotyping data resource: MoBaPsychGen pipeline v.1. bioRxiv

- 345 [10] Burgess S, Davey Smith G, Davies NM, et al. (2019) Guidelines for performing  
346 Mendelian randomization investigations. Wellcome Open Res 4: 186.  
347 10.12688/wellcomeopenres.15555.2
- 348 [11] Zhang D, Yang X, Li J, Yu J, Wu X (2019) Effect of hyperinsulinaemia and insulin  
349 resistance on endocrine, metabolic and fertility outcomes in women with polycystic ovary  
350 syndrome undergoing ovulation induction. Clin Endocrinol (Oxf) 91(3): 440-448.  
351 10.1111/cen.14050
- 352 [12] Xu P, Huang BY, Zhan JH, et al. (2019) Insulin Reduces Reaction of Follicular  
353 Granulosa Cells to FSH Stimulation in Women With Obesity-Related Infertility During IVF. J  
354 Clin Endocrinol Metab 104(7): 2547-2560. 10.1210/jc.2018-00686
- 355 [13] Foong SC, Abbott DH, Zschunke MA, Lesnick TG, Phy JL, Dumesic DA (2006)  
356 Follicle luteinization in hyperandrogenic follicles of polycystic ovary syndrome patients  
357 undergoing gonadotropin therapy for in vitro fertilization. J Clin Endocrinol Metab 91(6):  
358 2327-2333. 10.1210/jc.2005-2142

## 1 **SUPPLEMENTAL MATERIALS**

2

## 3 **SUPPLEMENTAL METHODS**

4

### 5 **MR assumptions and sensitivity analyses**

6 There are three key assumptions in MR: 1) genetic instruments are robustly related to the  
7 exposure, 2) there is no confounding of the genetic instrument-outcome associations, and 3)  
8 genetic instruments are exclusively linked to the outcome through the exposure of interest. If  
9 violated, MR conclusions may be invalid [1].

10 In relation to the first assumption, we estimated the robustness of our genetic  
11 instruments as the mean F-statistic (average  $\beta^2/\text{standard error}^2$  across all SNPs; F-  
12 statistics  $< 10$  suggest a weak genetic instrument) [1]. Regarding the second assumption, we  
13 reduced the potential confounding of the genetic instrument-outcome association due to  
14 population stratification by: 1) selecting our genetic instruments from GWASs performed in  
15 populations of European ancestry; 2) conducting MR analyses using GWASs adjusted for  
16 genetic principal components [2].

17 Genetic instruments that are related to other risk factors for the outcome different  
18 than the exposure of interest (horizontal pleiotropy) violate the third MR assumption [3]. We  
19 checked the presence of horizontal pleiotropy by procedures based on sensitivity MR  
20 methods (MR-Egger, weighted median, and weighted mode) [4]. It can be identified if: 1) a  
21 non-zero intercept is present in the MR-Egger method; 2) there is no concordance among  
22 MR estimates in inverse variance weighted and the alternative methods; 3) and between  
23 SNP heterogeneity is found according to the Cochran's Q and the Rücker's Q' [4]. Some  
24 associations were affected by horizontal pleiotropy, possibly due to the high inter-relation  
25 among cardiometabolic risk factors. We thus used the Steiger filtering to determine which  
26 SNPs explain more variation in our exposure of interest than in the rest of variables related to  
27 it (these SNPs are less susceptible of biasing findings due to horizontal pleiotropy) [4]. For  
28 example, 71 of the SNPs for fasting glucose explained more variability in fasting glucose

29 than in the other risk factors considered (the rest of risk factors [glycated hemoglobin, fasting  
30 insulin, LDL-C, HDL-C, triglycerides, SBP, DBP] plus BMI and ever smoking) and were  
31 retained after the filtering. We repeated MR analyses using exclusively the SNPs that passed  
32 the filtering process.

33 **SUPPLEMENTAL TABLES**

34

35 **Supplemental Table 1. SNPs included in fasting glucose-related analyses.**

36

| RSID        | Chrom. | Position  | Effect allele | Other allele | Effect allele freq. | Beta   | SE    | p-value   | Used in MR | Used in MR + Steiger filt. |
|-------------|--------|-----------|---------------|--------------|---------------------|--------|-------|-----------|------------|----------------------------|
| rs6662924   | 1      | 100894419 | A             | C            | 0.19                | 0.014  | 0.002 | 3.34E-10  | Yes        | Yes                        |
| rs78132593  | 1      | 150868102 | A             | C            | 0.21                | -0.015 | 0.002 | 2.60E-10  | Yes        | No                         |
| rs267738    | 1      | 150940625 | T             | G            | 0.79                | 0.013  | 0.002 | 3.23E-10  | Yes        | No                         |
| rs2075423   | 1      | 214154719 | T             | G            | 0.37                | -0.016 | 0.002 | 3.18E-21  | Yes        | Yes                        |
| rs340874    | 1      | 214159256 | T             | C            | 0.47                | -0.015 | 0.002 | 2.58E-20  | Yes        | Yes                        |
| rs348330    | 1      | 229672955 | A             | G            | 0.63                | -0.012 | 0.002 | 3.04E-10  | No         | No                         |
| rs877273    | 2      | 27140022  | T             | C            | 0.38                | 0.013  | 0.002 | 7.22E-15  | Yes        | Yes                        |
| rs1371614   | 2      | 27152874  | T             | C            | 0.25                | 0.016  | 0.002 | 5.85E-16  | Yes        | Yes                        |
| rs1260326   | 2      | 27730940  | T             | C            | 0.39                | -0.028 | 0.002 | 4.48E-65  | Yes        | Yes                        |
| rs780093    | 2      | 27742603  | T             | C            | 0.38                | -0.028 | 0.002 | 1.53E-59  | Yes        | Yes                        |
| rs115640879 | 2      | 28268742  | T             | C            | 0.08                | -0.024 | 0.004 | 1.30E-11  | Yes        | No                         |
| rs183381538 | 2      | 43775309  | A             | C            | 0.07                | -0.025 | 0.004 | 7.81E-15  | No         | No                         |
| rs189548    | 2      | 54941112  | A             | G            | 0.73                | -0.012 | 0.002 | 2.81E-09  | Yes        | Yes                        |
| rs78996387  | 2      | 169238040 | T             | C            | 0.08                | -0.023 | 0.004 | 1.03E-11  | Yes        | No                         |
| rs72883292  | 2      | 169710158 | T             | C            | 0.02                | -0.009 | 0.007 | 0.131     | Yes        | No                         |
| rs150171632 | 2      | 169748691 | T             | C            | 0.01                | -0.046 | 0.011 | 6.63E-05  | No         | No                         |
| rs111485380 | 2      | 169754123 | T             | C            | 0.83                | 0.07   | 0.003 | 1.02E-137 | No         | No                         |
| rs540524    | 2      | 169756930 | A             | G            | 0.62                | -0.011 | 0.002 | 1.12E-09  | Yes        | Yes                        |
| rs1402837   | 2      | 169757354 | T             | C            | 0.22                | 0.056  | 0.002 | 5.38E-162 | Yes        | Yes                        |
| rs573225    | 2      | 169757541 | A             | G            | 0.68                | 0.069  | 0.002 | 0         | Yes        | Yes                        |
| rs560887    | 2      | 169763148 | T             | C            | 0.3                 | -0.075 | 0.002 | 0         | Yes        | Yes                        |
| rs492594    | 2      | 169764176 | C             | G            | 0.46                | 0.016  | 0.002 | 7.36E-24  | No         | No                         |
| rs145353824 | 2      | 169765277 | A             | C            | 0.98                | -0.076 | 0.009 | 7.21E-18  | No         | No                         |
| rs17539351  | 2      | 169766560 | T             | C            | 0.12                | -0.068 | 0.003 | 5.86E-123 | Yes        | Yes                        |
| rs13430620  | 2      | 169768891 | A             | C            | 0.96                | 0.073  | 0.006 | 3.43E-40  | No         | No                         |
| rs563694    | 2      | 169774071 | A             | C            | 0.65                | 0.066  | 0.002 | 0         | Yes        | Yes                        |
| rs114764002 | 2      | 169776141 | A             | T            | 0.97                | 0.092  | 0.007 | 3.41E-43  | No         | No                         |
| rs191257736 | 2      | 169778471 | A             | G            | 0.02                | 0.036  | 0.009 | 3.21E-05  | No         | No                         |
| rs56100844  | 2      | 169786707 | T             | G            | 0.98                | 0.118  | 0.01  | 9.82E-35  | Yes        | No                         |
| rs3755158   | 2      | 169792188 | C             | G            | 0.89                | -0.04  | 0.003 | 4.83E-49  | Yes        | Yes                        |
| rs508741    | 2      | 169795288 | T             | C            | 0.64                | -0.013 | 0.002 | 1.91E-12  | Yes        | Yes                        |
| rs199666154 | 2      | 169800434 | G             | GT           | 0.73                | -0.044 | 0.003 | 1.52E-64  | No         | No                         |
| rs114691375 | 2      | 169813318 | A             | T            | 0.03                | 0.045  | 0.006 | 7.79E-17  | Yes        | No                         |
| rs6731931   | 2      | 173593726 | T             | C            | 0.8                 | -0.012 | 0.002 | 1.74E-07  | Yes        | No                         |
| rs11708067  | 3      | 123065778 | A             | G            | 0.77                | 0.028  | 0.002 | 1.63E-43  | Yes        | Yes                        |
| rs75098673  | 3      | 141094338 | T             | C            | 0.05                | -0.035 | 0.005 | 2.31E-11  | Yes        | No                         |
| rs16851397  | 3      | 141134818 | A             | G            | 0.95                | 0.033  | 0.004 | 1.26E-12  | Yes        | Yes                        |
| rs17437560  | 3      | 152180329 | T             | C            | 0.11                | -0.018 | 0.003 | 3.33E-08  | Yes        | Yes                        |
| rs1604038   | 3      | 170709193 | T             | C            | 0.29                | -0.02  | 0.002 | 4.47E-28  | Yes        | Yes                        |
| rs3215234   | 3      | 170724091 | G             | GT           | 0.87                | 0.025  | 0.003 | 6.50E-24  | No         | No                         |
| rs7631557   | 3      | 185513646 | C             | G            | 0.3                 | 0.011  | 0.002 | 8.10E-10  | Yes        | No                         |
| rs35188816  | 3      | 185526108 | C             | CA           | 0.29                | 0.012  | 0.002 | 8.67E-11  | No         | No                         |
| rs6808574   | 3      | 187740523 | T             | C            | 0.39                | -0.013 | 0.002 | 7.21E-14  | Yes        | Yes                        |
| rs4862423   | 4      | 185726548 | T             | C            | 0.4                 | 0.012  | 0.002 | 4.45E-10  | Yes        | Yes                        |
| rs157512    | 5      | 55809127  | T             | C            | 0.76                | 0.013  | 0.002 | 5.43E-10  | Yes        | No                         |
| rs7708285   | 5      | 76425867  | A             | G            | 0.73                | -0.013 | 0.002 | 1.25E-09  | Yes        | Yes                        |
| rs6878122   | 5      | 76427311  | A             | G            | 0.72                | -0.013 | 0.002 | 2.36E-09  | Yes        | No                         |
| rs1820176   | 5      | 95696585  | T             | C            | 0.71                | 0.025  | 0.002 | 1.91E-34  | Yes        | No                         |
| rs6876986   | 5      | 95703329  | C             | G            | 0.29                | -0.024 | 0.002 | 3.07E-33  | Yes        | No                         |
| rs7729395   | 5      | 102100576 | T             | C            | 0.05                | -0.023 | 0.005 | 3.09E-08  | Yes        | Yes                        |
| rs9379084   | 6      | 7231843   | A             | G            | 0.13                | -0.012 | 0.003 | 5.25E-06  | Yes        | Yes                        |
| rs3778321   | 6      | 7250270   | A             | G            | 0.19                | -0.019 | 0.002 | 3.16E-17  | Yes        | Yes                        |
| rs9348441   | 6      | 20680678  | A             | T            | 0.28                | 0.018  | 0.002 | 4.40E-20  | Yes        | No                         |
| rs10305457  | 6      | 39034095  | T             | C            | 0.09                | 0.024  | 0.003 | 1.21E-14  | Yes        | No                         |
| rs10305492  | 6      | 39046794  | A             | G            | 0.014               | -0.076 | 0.01  | 7.50E-16  | Yes        | Yes                        |
| rs12055786  | 6      | 153431125 | T             | C            | 0.42                | 0.012  | 0.002 | 1.17E-11  | Yes        | Yes                        |
| rs10281892  | 7      | 14919852  | A             | G            | 0.82                | -0.028 | 0.002 | 2.09E-35  | Yes        | No                         |
| rs2191346   | 7      | 15053878  | C             | G            | 0.46                | -0.024 | 0.002 | 1.51E-43  | No         | No                         |

|             |    |           |   |    |      |        |       |           |     |     |
|-------------|----|-----------|---|----|------|--------|-------|-----------|-----|-----|
| rs10487796  | 7  | 15063430  | A | T  | 0.48 | -0.026 | 0.002 | 4.62E-52  | No  | No  |
| rs10228796  | 7  | 15064190  | C | G  | 0.48 | -0.026 | 0.002 | 7.28E-52  | No  | No  |
| rs55841377  | 7  | 44145178  | C | G  | 0.78 | 0.009  | 0.002 | 1.01E-05  | Yes | No  |
| rs2971671   | 7  | 44211337  | T | C  | 0.77 | -0.043 | 0.002 | 1.24E-104 | Yes | Yes |
| rs2971670   | 7  | 44226101  | T | C  | 0.17 | 0.061  | 0.002 | 1.88E-165 | Yes | No  |
| rs1799884   | 7  | 44229068  | T | C  | 0.17 | 0.062  | 0.002 | 2.51E-167 | Yes | Yes |
| rs3757840   | 7  | 44231216  | T | G  | 0.49 | 0.042  | 0.002 | 5.94E-133 | Yes | Yes |
| rs6975024   | 7  | 44231886  | T | C  | 0.84 | -0.062 | 0.002 | 4.66E-167 | Yes | Yes |
| rs2908286   | 7  | 44234737  | T | C  | 0.17 | 0.061  | 0.002 | 1.88E-165 | Yes | No  |
| rs138917529 | 7  | 44235694  | A | T  | 0.98 | 0.06   | 0.007 | 4.08E-17  | Yes | No  |
| rs878521    | 7  | 44255643  | A | G  | 0.24 | 0.055  | 0.002 | 2.65E-174 | Yes | No  |
| rs2108349   | 7  | 50786663  | A | G  | 0.66 | -0.016 | 0.002 | 1.25E-15  | Yes | Yes |
| rs58925536  | 7  | 75654574  | T | C  | 0.03 | 0.031  | 0.005 | 5.82E-09  | Yes | No  |
| rs67070387  | 7  | 75836023  | T | C  | 0.03 | 0.031  | 0.006 | 1.60E-08  | Yes | No  |
| rs13242882  | 7  | 89800053  | A | T  | 0.46 | -0.01  | 0.002 | 9.27E-09  | No  | No  |
| rs194520    | 7  | 89854446  | T | G  | 0.45 | -0.009 | 0.002 | 1.14E-08  | Yes | Yes |
| rs7012637   | 8  | 9173209   | A | G  | 0.47 | -0.018 | 0.002 | 9.75E-25  | Yes | No  |
| rs9987289   | 8  | 9183358   | A | G  | 0.1  | 0.028  | 0.003 | 3.57E-23  | Yes | No  |
| rs4841132   | 8  | 9183596   | A | G  | 0.1  | 0.028  | 0.003 | 1.72E-22  | Yes | No  |
| rs12541643  | 8  | 81076874  | T | C  | 0.48 | 0.012  | 0.002 | 4.51E-09  | Yes | No  |
| rs896854    | 8  | 95960511  | T | C  | 0.5  | 0.01   | 0.002 | 5.61E-09  | Yes | Yes |
| rs13266634  | 8  | 118184783 | T | C  | 0.32 | -0.029 | 0.002 | 4.81E-57  | Yes | Yes |
| rs9650069   | 8  | 118204020 | T | C  | 0.32 | -0.029 | 0.002 | 8.31E-58  | Yes | No  |
| rs1574285   | 9  | 4283137   | T | G  | 0.59 | -0.019 | 0.002 | 6.85E-30  | Yes | Yes |
| rs57884925  | 9  | 4285119   | C | G  | 0.51 | -0.017 | 0.002 | 4.00E-24  | No  | No  |
| rs10974438  | 9  | 4291928   | A | C  | 0.64 | -0.02  | 0.002 | 9.85E-31  | Yes | Yes |
| rs10217762  | 9  | 22133645  | T | C  | 0.56 | -0.003 | 0.002 | 0.26      | Yes | No  |
| rs10811660  | 9  | 22134068  | A | G  | 0.18 | -0.022 | 0.002 | 7.94E-25  | Yes | No  |
| rs16913693  | 9  | 111680359 | T | G  | 0.97 | 0.039  | 0.005 | 2.82E-16  | Yes | Yes |
| rs507666    | 9  | 136149399 | A | G  | 0.2  | 0.016  | 0.002 | 6.99E-17  | Yes | No  |
| rs3829109   | 9  | 139256766 | A | G  | 0.3  | -0.016 | 0.002 | 1.09E-15  | Yes | Yes |
| rs10781511  | 9  | 139280766 | A | G  | 0.27 | -0.011 | 0.002 | 1.33E-06  | Yes | No  |
| rs2839671   | 10 | 26505822  | A | G  | 0.17 | -0.016 | 0.002 | 8.38E-14  | Yes | Yes |
| rs7095788   | 10 | 95384152  | T | C  | 0.35 | -0.011 | 0.002 | 1.98E-09  | Yes | Yes |
| rs35011531  | 10 | 113032095 | T | C  | 0.09 | -0.033 | 0.003 | 4.26E-31  | Yes | No  |
| rs12784552  | 10 | 113036354 | A | G  | 0.91 | 0.033  | 0.003 | 2.86E-31  | Yes | Yes |
| rs11195538  | 10 | 113117650 | T | C  | 0.93 | 0.019  | 0.004 | 6.23E-07  | Yes | Yes |
| rs61875120  | 10 | 114753259 | T | C  | 0.79 | -0.027 | 0.002 | 1.93E-32  | Yes | No  |
| rs34872471  | 10 | 114754071 | T | C  | 0.72 | -0.026 | 0.002 | 5.41E-35  | Yes | No  |
| rs7903146   | 10 | 114758349 | T | C  | 0.27 | 0.026  | 0.002 | 2.00E-35  | Yes | Yes |
| rs3842753   | 11 | 2181060   | T | G  | 0.28 | 0.013  | 0.002 | 2.84E-09  | Yes | No  |
| rs689       | 11 | 2182224   | A | T  | 0.28 | 0.013  | 0.002 | 3.27E-09  | Yes | No  |
| rs4930011   | 11 | 2856658   | C | G  | 0.59 | -0.009 | 0.002 | 2.84E-08  | Yes | No  |
| rs2168101   | 11 | 8255408   | A | C  | 0.32 | -0.013 | 0.002 | 3.09E-08  | No  | No  |
| rs10838524  | 11 | 45870177  | A | G  | 0.45 | 0.024  | 0.002 | 1.56E-40  | Yes | Yes |
| rs7115753   | 11 | 45912013  | A | G  | 0.46 | 0.024  | 0.002 | 2.83E-39  | Yes | No  |
| rs8914      | 11 | 46699124  | A | G  | 0.11 | -0.02  | 0.003 | 4.14E-13  | Yes | Yes |
| rs10501320  | 11 | 47293799  | C | G  | 0.25 | -0.022 | 0.002 | 1.09E-29  | Yes | Yes |
| rs10717442  | 11 | 47340680  | A | AT | 0.23 | 0.022  | 0.002 | 5.13E-18  | No  | No  |
| rs34228231  | 11 | 47820241  | A | G  | 0.23 | -0.018 | 0.002 | 1.32E-18  | Yes | No  |
| rs1483121   | 11 | 48333360  | A | G  | 0.14 | -0.016 | 0.003 | 7.99E-10  | Yes | Yes |
| rs10769572  | 11 | 49313235  | A | G  | 0.25 | 0.011  | 0.002 | 4.07E-08  | Yes | Yes |
| rs174583    | 11 | 61609750  | T | C  | 0.36 | -0.017 | 0.002 | 3.37E-22  | Yes | No  |
| rs77464186  | 11 | 72460398  | A | C  | 0.82 | 0.023  | 0.002 | 3.50E-25  | Yes | No  |
| rs11603349  | 11 | 72460694  | T | C  | 0.82 | 0.024  | 0.002 | 3.12E-25  | Yes | No  |
| rs7113297   | 11 | 92671744  | T | C  | 0.21 | 0.057  | 0.003 | 7.09E-100 | No  | No  |
| rs11523890  | 11 | 92679778  | T | C  | 0.34 | 0.052  | 0.002 | 6.75E-161 | Yes | Yes |
| rs10466351  | 11 | 92697981  | T | C  | 0.38 | 0.056  | 0.002 | 1.14E-205 | Yes | No  |
| rs10830962  | 11 | 92698427  | C | G  | 0.6  | -0.048 | 0.002 | 6.62E-156 | Yes | Yes |
| rs10830963  | 11 | 92708710  | C | G  | 0.71 | -0.077 | 0.002 | 0         | Yes | Yes |
| rs79354397  | 11 | 92708961  | T | C  | 0.97 | -0.081 | 0.006 | 4.82E-45  | Yes | No  |
| rs2657879   | 12 | 56865338  | A | G  | 0.82 | -0.012 | 0.002 | 7.33E-09  | Yes | Yes |
| rs12315434  | 12 | 57780936  | A | C  | 0.77 | 0.011  | 0.002 | 4.41E-08  | Yes | No  |
| rs6538804   | 12 | 97848910  | C | G  | 0.61 | 0.014  | 0.002 | 9.41E-14  | Yes | Yes |
| rs6489811   | 12 | 121893626 | A | G  | 0.47 | -0.011 | 0.002 | 3.27E-09  | Yes | Yes |
| rs7962128   | 12 | 121907336 | A | G  | 0.44 | -0.011 | 0.002 | 1.78E-08  | Yes | No  |
| rs11610045  | 12 | 133063768 | A | G  | 0.5  | 0.014  | 0.002 | 3.26E-13  | Yes | No  |
| rs11619319  | 13 | 28487599  | A | G  | 0.78 | -0.017 | 0.002 | 3.41E-20  | Yes | Yes |
| rs576674    | 13 | 33554302  | A | G  | 0.84 | -0.018 | 0.002 | 9.70E-13  | Yes | Yes |
| rs8003022   | 14 | 90038821  | A | G  | 0.61 | -0.013 | 0.002 | 5.27E-10  | Yes | Yes |
| rs35889227  | 14 | 90055468  | T | G  | 0.62 | -0.013 | 0.002 | 3.37E-10  | Yes | No  |
| rs12888855  | 14 | 100830818 | A | C  | 0.21 | -0.014 | 0.002 | 6.02E-12  | Yes | Yes |

|            |    |          |   |    |      |        |       |          |     |     |
|------------|----|----------|---|----|------|--------|-------|----------|-----|-----|
| rs7163757  | 15 | 62391608 | T | C  | 0.45 | -0.022 | 0.002 | 2.64E-36 | Yes | Yes |
| rs12594062 | 15 | 75102851 | T | C  | 0.36 | 0.01   | 0.002 | 4.64E-09 | Yes | No  |
| rs11630478 | 15 | 75102923 | T | G  | 0.64 | -0.01  | 0.002 | 4.64E-09 | Yes | No  |
| rs7178572  | 15 | 77747190 | A | G  | 0.3  | -0.012 | 0.002 | 7.09E-10 | Yes | Yes |
| rs11633054 | 15 | 77747276 | A | G  | 0.3  | -0.013 | 0.002 | 3.82E-09 | Yes | Yes |
| rs6598541  | 15 | 99271135 | A | G  | 0.36 | 0.011  | 0.002 | 4.12E-12 | Yes | Yes |
| rs2238435  | 16 | 4014282  | C | G  | 0.4  | 0.011  | 0.002 | 3.82E-09 | Yes | No  |
| rs2302593  | 19 | 46196634 | C | G  | 0.5  | 0.011  | 0.002 | 5.67E-10 | No  | No  |
| rs6113722  | 20 | 22557099 | A | G  | 0.04 | -0.042 | 0.004 | 7.66E-25 | Yes | Yes |
| rs3833331  | 20 | 22562326 | A | AG | 0.95 | 0.045  | 0.005 | 1.92E-22 | No  | No  |
| rs1337918  | 20 | 22567608 | A | C  | 0.04 | -0.046 | 0.005 | 2.30E-22 | Yes | No  |
| rs17265513 | 20 | 39832628 | T | C  | 0.79 | -0.016 | 0.002 | 5.10E-14 | Yes | Yes |
| rs39713    | 22 | 30343186 | T | C  | 0.09 | -0.017 | 0.003 | 1.77E-08 | Yes | Yes |



38 **Supplemental Table 2.** SNPs included in glycated hemoglobin-related analyses.

39

| RSID        | Chrom. | Position  | Effect allele | Other allele | Effect allele freq. | Beta   | SE    | p-value   | Used in MR | Used in MR + Steiger filt. |
|-------------|--------|-----------|---------------|--------------|---------------------|--------|-------|-----------|------------|----------------------------|
| rs1175549   | 1      | 3691727   | A             | C            | 0.75                | 0.01   | 0.002 | 7.13E-13  | Yes        | Yes                        |
| rs2375278   | 1      | 25529038  | A             | G            | 0.17                | 0.011  | 0.002 | 1.05E-11  | Yes        | Yes                        |
| rs644592    | 1      | 25703156  | T             | C            | 0.15                | 0.013  | 0.002 | 1.58E-11  | Yes        | No                         |
| rs267738    | 1      | 150940625 | T             | G            | 0.79                | 0.011  | 0.002 | 1.14E-11  | Yes        | Yes                        |
| rs7534795   | 1      | 155275553 | T             | C            | 0.26                | 0.01   | 0.002 | 2.13E-09  | No         | No                         |
| rs10796941  | 1      | 155284261 | T             | C            | 0.25                | 0.01   | 0.002 | 9.22E-09  | Yes        | No                         |
| rs857725    | 1      | 158607935 | T             | G            | 0.73                | -0.021 | 0.001 | 5.43E-55  | Yes        | Yes                        |
| rs857676    | 1      | 158615702 | A             | G            | 0.57                | 0.01   | 0.001 | 7.04E-16  | Yes        | Yes                        |
| rs7547793   | 1      | 203653544 | A             | C            | 0.13                | -0.012 | 0.002 | 6.61E-09  | Yes        | No                         |
| rs10900585  | 1      | 203654024 | T             | G            | 0.88                | 0.012  | 0.002 | 7.97E-09  | Yes        | No                         |
| rs340882    | 1      | 214145731 | C             | G            | 0.41                | -0.008 | 0.001 | 1.48E-10  | Yes        | No                         |
| rs12612492  | 2      | 24093756  | T             | C            | 0.12                | 0.019  | 0.002 | 1.88E-26  | Yes        | Yes                        |
| rs6545222   | 2      | 24235704  | A             | G            | 0.75                | 0.01   | 0.002 | 1.86E-14  | Yes        | Yes                        |
| rs1367173   | 2      | 43449385  | T             | C            | 0.12                | -0.015 | 0.002 | 1.66E-14  | Yes        | Yes                        |
| rs6723441   | 2      | 48123915  | A             | T            | 0.81                | -0.009 | 0.002 | 2.26E-08  | Yes        | Yes                        |
| rs17037289  | 2      | 48587198  | A             | G            | 0.75                | -0.009 | 0.002 | 2.40E-09  | Yes        | No                         |
| rs150171632 | 2      | 169748691 | T             | C            | 0.01                | -0.033 | 0.009 | 4.48E-05  | No         | No                         |
| rs540524    | 2      | 169756930 | A             | G            | 0.63                | -0.002 | 0.001 | 0.167     | Yes        | No                         |
| rs560887    | 2      | 169763148 | T             | C            | 0.3                 | -0.031 | 0.001 | 5.55E-122 | Yes        | No                         |
| rs13419326  | 2      | 169771420 | A             | C            | 0.98                | -0.032 | 0.005 | 5.60E-13  | Yes        | No                         |
| rs557462    | 2      | 169777595 | T             | C            | 0.65                | 0.027  | 0.001 | 3.94E-102 | Yes        | No                         |
| rs56100844  | 2      | 169786707 | T             | G            | 0.98                | 0.058  | 0.007 | 4.47E-17  | Yes        | No                         |
| rs17256082  | 2      | 175292364 | T             | C            | 0.67                | -0.007 | 0.001 | 3.19E-08  | Yes        | Yes                        |
| rs4674280   | 2      | 219141458 | C             | G            | 0.57                | 0.008  | 0.001 | 5.48E-09  | No         | No                         |
| rs13427681  | 2      | 219167563 | C             | G            | 0.57                | 0.008  | 0.001 | 1.27E-08  | No         | No                         |
| rs1822534   | 3      | 12266804  | A             | G            | 0.62                | 0.008  | 0.001 | 3.65E-13  | Yes        | No                         |
| rs12491937  | 3      | 12268244  | A             | G            | 0.58                | 0.009  | 0.001 | 1.42E-13  | Yes        | No                         |
| rs9818758   | 3      | 49382925  | A             | G            | 0.18                | 0.013  | 0.002 | 1.49E-13  | Yes        | Yes                        |
| rs66499923  | 3      | 52887861  | A             | AT           | 0.61                | -0.008 | 0.002 | 9.35E-09  | No         | No                         |
| rs11719201  | 3      | 123068744 | T             | C            | 0.24                | -0.013 | 0.002 | 2.43E-18  | Yes        | No                         |
| rs1604038   | 3      | 170709193 | T             | C            | 0.29                | -0.011 | 0.001 | 2.76E-16  | Yes        | No                         |
| rs4894769   | 3      | 171516306 | A             | T            | 0.43                | -0.007 | 0.001 | 3.61E-09  | No         | No                         |
| rs13089972  | 3      | 171798694 | A             | T            | 0.58                | 0.011  | 0.001 | 1.87E-15  | No         | No                         |
| rs7632281   | 3      | 171812293 | T             | G            | 0.43                | -0.011 | 0.001 | 1.54E-14  | Yes        | No                         |
| rs13134327  | 4      | 144659795 | A             | G            | 0.33                | 0.014  | 0.001 | 2.81E-26  | Yes        | Yes                        |
| rs13129993  | 4      | 144684229 | A             | T            | 0.32                | 0.015  | 0.002 | 1.61E-24  | Yes        | Yes                        |
| rs112578089 | 4      | 145128105 | A             | G            | 0.04                | -0.036 | 0.006 | 2.18E-11  | No         | No                         |
| rs77909720  | 4      | 145222284 | T             | C            | 0.04                | -0.023 | 0.004 | 1.63E-09  | No         | No                         |
| rs6877043   | 5      | 154048367 | T             | C            | 0.64                | 0.009  | 0.001 | 1.99E-10  | Yes        | Yes                        |
| rs1948759   | 5      | 156442657 | A             | G            | 0.17                | -0.01  | 0.002 | 2.44E-08  | Yes        | No                         |
| rs3778321   | 6      | 7250270   | A             | G            | 0.19                | -0.011 | 0.002 | 4.18E-11  | Yes        | No                         |
| rs34499031  | 6      | 20676414  | T             | TAA          | 0.72                | -0.01  | 0.002 | 2.93E-12  | No         | No                         |
| rs35612982  | 6      | 20682622  | T             | C            | 0.82                | -0.01  | 0.002 | 2.47E-10  | Yes        | No                         |
| rs6931514   | 6      | 20703952  | A             | G            | 0.73                | -0.01  | 0.001 | 1.18E-13  | Yes        | No                         |
| rs12193223  | 6      | 24978511  | C             | G            | 0.94                | 0.02   | 0.003 | 5.87E-09  | Yes        | Yes                        |
| rs75580845  | 6      | 25578433  | T             | C            | 0.92                | 0.02   | 0.002 | 1.23E-20  | Yes        | No                         |
| rs1799945   | 6      | 26091179  | C             | G            | 0.86                | 0.025  | 0.002 | 3.32E-47  | Yes        | Yes                        |
| rs1800562   | 6      | 26093141  | A             | G            | 0.06                | -0.038 | 0.003 | 2.33E-50  | Yes        | Yes                        |
| rs13194491  | 6      | 27037080  | T             | C            | 0.07                | -0.024 | 0.003 | 1.20E-19  | No         | No                         |
| rs13214703  | 6      | 27941387  | T             | C            | 0.93                | 0.02   | 0.003 | 2.49E-15  | Yes        | Yes                        |
| rs34979126  | 6      | 28449380  | A             | G            | 0.07                | -0.018 | 0.003 | 5.60E-13  | Yes        | No                         |
| rs116735744 | 6      | 28984755  | T             | G            | 0.24                | -0.011 | 0.002 | 2.66E-10  | No         | No                         |
| rs6929796   | 6      | 31522669  | A             | G            | 0.17                | -0.009 | 0.002 | 3.26E-08  | Yes        | Yes                        |
| rs9376090   | 6      | 135411228 | T             | C            | 0.73                | 0.025  | 0.001 | 1.90E-62  | Yes        | Yes                        |
| rs9389268   | 6      | 135419631 | A             | G            | 0.73                | 0.023  | 0.002 | 1.62E-51  | Yes        | Yes                        |
| rs10231021  | 7      | 15060429  | A             | T            | 0.51                | 0.009  | 0.001 | 8.69E-14  | No         | No                         |
| rs2191349   | 7      | 15064309  | T             | G            | 0.53                | 0.008  | 0.001 | 1.87E-12  | Yes        | No                         |
| rs10259649  | 7      | 44219705  | T             | C            | 0.77                | -0.024 | 0.002 | 4.02E-55  | Yes        | No                         |
| rs2971670   | 7      | 44226101  | T             | C            | 0.17                | 0.032  | 0.002 | 5.10E-88  | Yes        | No                         |
| rs1799884   | 7      | 44229068  | T             | C            | 0.17                | 0.032  | 0.002 | 1.62E-87  | Yes        | No                         |
| rs3757840   | 7      | 44231216  | T             | G            | 0.5                 | 0.022  | 0.001 | 4.25E-71  | Yes        | No                         |
| rs2908286   | 7      | 44234737  | T             | C            | 0.17                | 0.032  | 0.002 | 1.62E-87  | Yes        | No                         |
| rs35332062  | 7      | 73012042  | A             | G            | 0.12                | 0.011  | 0.002 | 4.66E-09  | Yes        | No                         |
| rs13234131  | 7      | 73025975  | A             | G            | 0.87                | -0.011 | 0.002 | 2.06E-09  | Yes        | No                         |

|             |    |           |   |       |       |        |       |           |     |     |
|-------------|----|-----------|---|-------|-------|--------|-------|-----------|-----|-----|
| rs4731113   | 7  | 123283949 | T | C     | 0.96  | 0.02   | 0.004 | 4.90E-08  | Yes | No  |
| rs4317621   | 8  | 41516581  | A | G     | 0.42  | -0.004 | 0.001 | 0.00784   | Yes | No  |
| rs34664882  | 8  | 41543675  | A | G     | 0.03  | -0.049 | 0.004 | 4.82E-37  | Yes | No  |
| rs4737009   | 8  | 41630405  | A | G     | 0.24  | 0.023  | 0.002 | 8.29E-56  | Yes | Yes |
| rs6980507   | 8  | 42383084  | A | G     | 0.4   | 0.011  | 0.001 | 8.15E-20  | Yes | Yes |
| rs11558471  | 8  | 118185733 | A | G     | 0.68  | 0.015  | 0.001 | 3.38E-25  | Yes | No  |
| rs35859536  | 8  | 118191475 | T | C     | 0.32  | -0.015 | 0.001 | 1.15E-24  | Yes | No  |
| rs2954021   | 8  | 126482077 | A | G     | 0.49  | -0.007 | 0.001 | 1.92E-10  | Yes | No  |
| rs10811661  | 9  | 22134094  | T | C     | 0.82  | 0.013  | 0.002 | 1.74E-14  | Yes | No  |
| rs10811662  | 9  | 22134253  | A | G     | 0.18  | -0.013 | 0.002 | 3.17E-14  | Yes | No  |
| rs7847351   | 9  | 79977312  | A | G     | 0.81  | -0.013 | 0.002 | 4.95E-14  | Yes | No  |
| rs12351997  | 9  | 80015424  | T | C     | 0.8   | -0.013 | 0.002 | 4.50E-14  | Yes | Yes |
| rs61750929  | 9  | 91495135  | T | C     | 0.06  | -0.028 | 0.003 | 9.49E-24  | Yes | No  |
| rs7042939   | 9  | 110511408 | A | G     | 0.4   | 0.01   | 0.001 | 1.50E-15  | Yes | Yes |
| rs1467311   | 9  | 110536932 | A | G     | 0.66  | -0.011 | 0.001 | 2.26E-15  | Yes | Yes |
| rs649129    | 9  | 136154304 | T | C     | 0.22  | 0.011  | 0.002 | 3.28E-15  | Yes | No  |
| rs3829109   | 9  | 139256766 | A | G     | 0.3   | -0.009 | 0.002 | 2.68E-08  | Yes | No  |
| rs11257655  | 10 | 12307894  | T | C     | 0.22  | 0.011  | 0.002 | 1.91E-13  | Yes | Yes |
| rs5785903   | 10 | 71002040  | T | TG    | 0.43  | 0.017  | 0.002 | 4.39E-29  | No  | No  |
| rs4745982   | 10 | 71089843  | T | G     | 0.92  | 0.074  | 0.003 | 8.36E-143 | Yes | Yes |
| rs150705486 | 10 | 71093216  | A | G     | 0.02  | -0.114 | 0.006 | 4.24E-72  | Yes | No  |
| rs17476364  | 10 | 71094504  | T | C     | 0.9   | 0.086  | 0.002 | 1.33E-314 | Yes | No  |
| rs72805692  | 10 | 71099109  | A | G     | 0.89  | 0.079  | 0.002 | 8.52E-294 | Yes | No  |
| rs200572185 | 10 | 71118821  | A | AAG   | 0.04  | -0.094 | 0.004 | 1.53E-140 | No  | No  |
| rs7903146   | 10 | 114758349 | T | C     | 0.28  | 0.013  | 0.001 | 1.04E-22  | Yes | No  |
| rs4980325   | 11 | 234451    | T | G     | 0.53  | 0.011  | 0.001 | 4.70E-14  | Yes | No  |
| rs3842753   | 11 | 2181060   | T | G     | 0.28  | 0.008  | 0.002 | 3.93E-08  | Yes | No  |
| rs373894    | 11 | 9763094   | A | C     | 0.72  | 0.008  | 0.002 | 5.28E-09  | Yes | Yes |
| rs360140    | 11 | 9776567   | A | C     | 0.66  | -0.008 | 0.001 | 9.62E-13  | Yes | Yes |
| rs117706710 | 11 | 10508903  | T | G     | 0.009 | 0.046  | 0.009 | 4.80E-08  | Yes | No  |
| rs11039154  | 11 | 47278502  | T | C     | 0.28  | -0.009 | 0.001 | 3.11E-09  | Yes | No  |
| rs10838696  | 11 | 47363285  | A | G     | 0.35  | -0.007 | 0.001 | 6.53E-09  | Yes | No  |
| rs174559    | 11 | 61581656  | A | G     | 0.27  | -0.011 | 0.001 | 3.31E-13  | Yes | No  |
| rs174584    | 11 | 61610750  | A | G     | 0.35  | -0.009 | 0.001 | 2.60E-10  | Yes | No  |
| rs10466351  | 11 | 92697981  | T | C     | 0.38  | 0.015  | 0.001 | 5.02E-26  | Yes | No  |
| rs10830963  | 11 | 92708710  | C | G     | 0.72  | -0.02  | 0.002 | 1.54E-36  | Yes | No  |
| rs11224302  | 11 | 100456604 | T | C     | 0.1   | -0.016 | 0.002 | 4.63E-14  | Yes | Yes |
| rs117233107 | 12 | 4328521   | A | G     | 0.02  | -0.047 | 0.007 | 8.45E-11  | Yes | No  |
| rs2110073   | 12 | 7075882   | T | C     | 0.1   | 0.012  | 0.002 | 5.79E-09  | Yes | Yes |
| rs76261711  | 12 | 48486696  | A | T     | 0.9   | 0.014  | 0.002 | 4.35E-10  | Yes | No  |
| rs4760682   | 12 | 48512285  | A | C     | 0.8   | 0.016  | 0.002 | 3.20E-20  | Yes | No  |
| rs10774624  | 12 | 111833788 | A | G     | 0.52  | 0.009  | 0.001 | 4.17E-14  | Yes | No  |
| rs17696736  | 12 | 112486818 | A | G     | 0.57  | 0.009  | 0.001 | 4.73E-12  | Yes | No  |
| rs4766971   | 12 | 113018479 | A | G     | 0.09  | 0.01   | 0.002 | 4.73E-08  | Yes | No  |
| rs76533333  | 13 | 113352916 | A | G     | 0.92  | -0.027 | 0.003 | 2.81E-29  | Yes | No  |
| rs1278769   | 13 | 113536627 | A | G     | 0.24  | -0.009 | 0.002 | 5.52E-12  | Yes | Yes |
| rs7994900   | 13 | 114553134 | T | C     | 0.27  | 0.011  | 0.002 | 6.65E-14  | Yes | No  |
| rs2273475   | 14 | 65268605  | A | G     | 0.9   | -0.013 | 0.002 | 1.99E-09  | Yes | Yes |
| rs147727276 | 14 | 73601025  | A | G     | 0.1   | -0.013 | 0.002 | 9.16E-10  | Yes | No  |
| rs10151436  | 14 | 73616095  | A | T     | 0.89  | 0.013  | 0.002 | 3.85E-11  | Yes | Yes |
| rs1535464   | 14 | 100793431 | A | G     | 0.23  | -0.009 | 0.002 | 1.11E-08  | Yes | No  |
| rs33952550  | 14 | 100798141 | C | CCTCA | 0.73  | 0.009  | 0.002 | 9.02E-09  | No  | No  |
| rs452306    | 15 | 65822777  | T | C     | 0.59  | -0.01  | 0.001 | 5.51E-13  | Yes | No  |
| rs368777    | 15 | 65849552  | A | G     | 0.57  | -0.009 | 0.001 | 1.69E-12  | Yes | No  |
| rs11248914  | 16 | 293562    | T | C     | 0.66  | 0.011  | 0.001 | 1.42E-14  | Yes | Yes |
| rs9926463   | 16 | 11437607  | A | C     | 0.31  | 0.008  | 0.002 | 4.01E-09  | Yes | No  |
| rs11643024  | 16 | 11443183  | A | G     | 0.31  | 0.008  | 0.002 | 7.98E-10  | Yes | No  |
| rs4787458   | 16 | 28531287  | A | G     | 0.62  | -0.008 | 0.001 | 1.16E-10  | Yes | No  |
| rs7190771   | 16 | 28590030  | A | G     | 0.38  | 0.009  | 0.001 | 6.02E-11  | No  | No  |
| rs7198799   | 16 | 68818390  | T | C     | 0.29  | 0.008  | 0.001 | 4.76E-09  | Yes | Yes |
| rs1862748   | 16 | 68832943  | T | C     | 0.3   | 0.008  | 0.001 | 8.35E-09  | Yes | Yes |
| rs4238685   | 16 | 88775220  | T | C     | 0.1   | 0.006  | 0.002 | 0.00101   | Yes | Yes |
| rs837763    | 16 | 88853729  | T | C     | 0.56  | 0.018  | 0.001 | 5.20E-38  | Yes | Yes |
| rs8075153   | 17 | 17622666  | T | C     | 0.43  | -0.007 | 0.001 | 5.19E-08  | Yes | Yes |
| rs9914988   | 17 | 27183104  | A | G     | 0.8   | 0.013  | 0.002 | 4.66E-17  | Yes | Yes |
| rs2748427   | 17 | 76121864  | A | G     | 0.78  | -0.031 | 0.002 | 9.82E-49  | No  | No  |
| rs2748424   | 17 | 76124865  | C | G     | 0.81  | -0.031 | 0.002 | 4.13E-39  | No  | No  |
| rs200350733 | 17 | 76125194  | A | AGC   | 0.2   | 0.033  | 0.003 | 1.48E-40  | No  | No  |
| rs72634341  | 17 | 80682778  | A | G     | 0.72  | -0.031 | 0.002 | 5.59E-97  | Yes | No  |
| rs9909940   | 17 | 80689036  | T | C     | 0.31  | 0.032  | 0.001 | 1.43E-116 | Yes | No  |
| rs62076520  | 17 | 80695406  | A | G     | 0.37  | -0.026 | 0.001 | 3.06E-82  | Yes | No  |
| rs113373052 | 17 | 80697458  | T | C     | 0.3   | 0.033  | 0.001 | 7.09E-113 | Yes | No  |

|             |    |           |   |      |       |        |       |          |     |     |
|-------------|----|-----------|---|------|-------|--------|-------|----------|-----|-----|
| rs12452572  | 17 | 80702963  | A | G    | 0.47  | 0.023  | 0.001 | 9.53E-67 | No  | No  |
| rs191734192 | 17 | 80778724  | A | G    | 0.13  | 0.042  | 0.003 | 3.75E-66 | No  | No  |
| rs141786856 | 17 | 80950648  | C | CAAT | 0.04  | 0.021  | 0.005 | 8.52E-07 | No  | No  |
| rs28671200  | 18 | 43774444  | T | G    | 0.68  | 0.009  | 0.002 | 1.56E-08 | No  | No  |
| rs12982956  | 19 | 17238413  | A | G    | 0.72  | 0.007  | 0.002 | 3.26E-08 | Yes | No  |
| rs17533945  | 19 | 17257802  | T | C    | 0.6   | -0.013 | 0.001 | 1.62E-23 | Yes | Yes |
| rs12978547  | 19 | 33037212  | C | G    | 0.97  | 0.028  | 0.004 | 3.96E-12 | Yes | Yes |
| rs10405535  | 19 | 33072085  | A | G    | 0.3   | 0.012  | 0.002 | 6.47E-14 | Yes | No  |
| rs4499344   | 19 | 33073431  | A | G    | 0.31  | -0.011 | 0.002 | 1.35E-12 | Yes | Yes |
| rs737092    | 20 | 55990405  | T | C    | 0.51  | -0.007 | 0.001 | 7.57E-09 | Yes | Yes |
| rs855791    | 22 | 37462936  | A | G    | 0.43  | 0.019  | 0.001 | 1.34E-56 | Yes | Yes |
| rs2143923   | 22 | 43141907  | A | G    | 0.48  | 0.007  | 0.001 | 3.97E-08 | Yes | No  |
| rs184506746 | X  | 150104927 | T | C    | 0.013 | -0.171 | 0.028 | 2.46E-08 | No  | No  |
| rs182859029 | X  | 152051223 | T | C    | 0.99  | 0.246  | 0.038 | 8.03E-10 | No  | No  |
| rs138245006 | X  | 153018275 | T | C    | 0.97  | 0.251  | 0.015 | 1.98E-58 | No  | No  |
| rs140801471 | X  | 153542572 | A | G    | 0.05  | -0.082 | 0.007 | 6.42E-31 | No  | No  |
| rs149309160 | X  | 154212603 | T | G    | 0.95  | 0.125  | 0.008 | 2.36E-47 | No  | No  |

41 **Supplemental Table 3.** SNPs included in fasting insulin-related analyses.

42

| RSID        | Chrom. | Position  | Effect allele | Other allele | Effect allele freq. | Beta   | SE    | p-value  | Used in MR | Used in MR + Steiger filt. |
|-------------|--------|-----------|---------------|--------------|---------------------|--------|-------|----------|------------|----------------------------|
| rs6674544   | 1      | 219628973 | A             | G            | 0.57                | 0.018  | 0.002 | 6.97E-21 | No         | No                         |
| rs77935490  | 2      | 630902    | A             | T            | 0.21                | 0.014  | 0.003 | 1.07E-08 | No         | No                         |
| rs1260326   | 2      | 27730940  | T             | C            | 0.39                | -0.023 | 0.002 | 8.42E-38 | Yes        | No                         |
| rs6713419   | 2      | 165508300 | T             | C            | 0.63                | 0.019  | 0.002 | 1.44E-24 | Yes        | Yes                        |
| rs75265117  | 2      | 165518799 | C             | G            | 0.88                | 0.028  | 0.003 | 1.54E-24 | Yes        | No                         |
| rs1128249   | 2      | 165528624 | T             | G            | 0.39                | -0.02  | 0.002 | 7.71E-28 | Yes        | Yes                        |
| rs13389219  | 2      | 165528876 | T             | C            | 0.39                | -0.02  | 0.002 | 5.84E-28 | Yes        | Yes                        |
| rs2943646   | 2      | 227099534 | A             | G            | 0.37                | -0.025 | 0.002 | 8.47E-39 | Yes        | Yes                        |
| rs2972145   | 2      | 227101309 | T             | C            | 0.37                | -0.025 | 0.002 | 6.08E-38 | Yes        | No                         |
| rs308971    | 3      | 12116620  | A             | G            | 0.87                | -0.022 | 0.003 | 3.91E-13 | Yes        | Yes                        |
| rs11712037  | 3      | 12344730  | C             | G            | 0.87                | 0.028  | 0.003 | 2.10E-21 | Yes        | No                         |
| rs35000407  | 3      | 12351521  | T             | G            | 0.86                | 0.026  | 0.003 | 1.50E-21 | Yes        | No                         |
| rs9819511   | 3      | 49884261  | T             | C            | 0.3                 | 0.014  | 0.002 | 2.26E-08 | Yes        | No                         |
| rs17331151  | 3      | 52844534  | T             | C            | 0.11                | -0.016 | 0.003 | 1.52E-08 | Yes        | Yes                        |
| rs11708067  | 3      | 123065778 | A             | G            | 0.78                | -0.014 | 0.002 | 1.30E-09 | Yes        | No                         |
| rs62271373  | 3      | 150066540 | A             | T            | 0.06                | 0.026  | 0.005 | 1.60E-08 | Yes        | No                         |
| rs2276936   | 4      | 89726283  | A             | C            | 0.5                 | -0.012 | 0.002 | 4.25E-11 | Yes        | Yes                        |
| rs3775380   | 4      | 89739808  | A             | G            | 0.5                 | -0.012 | 0.002 | 1.48E-11 | Yes        | Yes                        |
| rs9884482   | 4      | 106081636 | T             | C            | 0.61                | -0.013 | 0.002 | 2.88E-11 | Yes        | Yes                        |
| rs10010325  | 4      | 106106353 | A             | C            | 0.48                | 0.012  | 0.002 | 4.05E-11 | Yes        | Yes                        |
| rs11727676  | 4      | 145659064 | T             | C            | 0.91                | -0.02  | 0.004 | 2.90E-08 | Yes        | Yes                        |
| rs6855363   | 4      | 157670537 | T             | C            | 0.68                | 0.013  | 0.002 | 4.04E-08 | Yes        | Yes                        |
| rs4865796   | 5      | 53272664  | A             | G            | 0.68                | 0.017  | 0.002 | 7.33E-17 | Yes        | Yes                        |
| rs459193    | 5      | 55806751  | A             | G            | 0.27                | -0.018 | 0.002 | 1.12E-18 | Yes        | Yes                        |
| rs3936511   | 5      | 55860781  | A             | G            | 0.82                | -0.019 | 0.003 | 2.81E-14 | Yes        | Yes                        |
| rs116141873 | 6      | 34222201  | T             | G            | 0.04                | 0.043  | 0.006 | 1.42E-11 | Yes        | No                         |
| rs2780215   | 6      | 34236973  | A             | G            | 0.96                | 0.039  | 0.006 | 1.06E-09 | No         | No                         |
| rs998584    | 6      | 43757896  | A             | C            | 0.49                | 0.012  | 0.002 | 2.31E-10 | Yes        | No                         |
| rs9472135   | 6      | 43809802  | T             | C            | 0.7                 | 0.011  | 0.002 | 4.21E-08 | Yes        | Yes                        |
| rs1474696   | 6      | 127449246 | A             | G            | 0.49                | -0.015 | 0.002 | 3.02E-16 | Yes        | No                         |
| rs2745353   | 6      | 127452935 | T             | C            | 0.52                | 0.015  | 0.002 | 4.63E-16 | Yes        | Yes                        |
| rs73013411  | 6      | 164126233 | A             | C            | 0.13                | -0.018 | 0.003 | 2.08E-08 | Yes        | No                         |
| rs4709746   | 6      | 164133001 | T             | C            | 0.13                | -0.018 | 0.003 | 2.97E-08 | Yes        | No                         |
| rs2108349   | 7      | 50786663  | A             | G            | 0.66                | -0.012 | 0.002 | 1.13E-08 | Yes        | No                         |
| rs13234269  | 7      | 130429186 | A             | T            | 0.48                | -0.011 | 0.002 | 1.27E-08 | No         | No                         |
| rs972283    | 7      | 130466854 | A             | G            | 0.47                | -0.011 | 0.002 | 1.09E-08 | Yes        | No                         |
| rs330945    | 8      | 9021933   | T             | C            | 0.63                | 0.014  | 0.002 | 1.82E-11 | Yes        | No                         |
| rs7012637   | 8      | 9173209   | A             | G            | 0.48                | -0.022 | 0.002 | 1.48E-29 | Yes        | No                         |
| rs7012814   | 8      | 9173358   | A             | G            | 0.48                | -0.022 | 0.002 | 8.34E-30 | Yes        | No                         |
| rs4841132   | 8      | 9183596   | A             | G            | 0.11                | 0.026  | 0.003 | 3.83E-20 | Yes        | No                         |
| rs13258890  | 8      | 23615445  | T             | C            | 0.77                | 0.013  | 0.003 | 2.77E-08 | Yes        | Yes                        |
| rs75179845  | 9      | 136132954 | T             | C            | 0.91                | -0.022 | 0.004 | 6.05E-11 | Yes        | No                         |
| rs8176693   | 9      | 136137657 | T             | C            | 0.1                 | 0.02   | 0.003 | 1.10E-10 | Yes        | Yes                        |
| rs118164457 | 10     | 89680631  | T             | C            | 0.96                | -0.035 | 0.006 | 3.86E-10 | Yes        | No                         |
| rs12769346  | 10     | 89764490  | T             | G            | 0.86                | -0.015 | 0.003 | 1.20E-08 | Yes        | Yes                        |
| rs7903146   | 10     | 114758349 | T             | C            | 0.27                | -0.012 | 0.002 | 1.24E-09 | Yes        | No                         |
| rs2845885   | 11     | 63869062  | T             | C            | 0.93                | -0.02  | 0.004 | 1.18E-08 | Yes        | Yes                        |
| rs2054435   | 12     | 21696684  | A             | G            | 0.22                | -0.015 | 0.003 | 9.50E-09 | Yes        | Yes                        |
| rs6487237   | 12     | 21699928  | A             | C            | 0.78                | 0.015  | 0.003 | 4.68E-09 | Yes        | Yes                        |
| rs111264094 | 12     | 48202696  | C             | G            | 0.97                | 0.057  | 0.009 | 1.64E-09 | Yes        | No                         |
| rs1351394   | 12     | 66351826  | T             | C            | 0.49                | -0.011 | 0.002 | 2.71E-09 | Yes        | Yes                        |
| rs7968682   | 12     | 66371880  | T             | G            | 0.51                | 0.011  | 0.002 | 3.17E-09 | Yes        | Yes                        |
| rs1402013   | 12     | 102740822 | A             | G            | 0.35                | -0.009 | 0.002 | 1.31E-06 | Yes        | Yes                        |
| rs860598    | 12     | 102898446 | A             | G            | 0.82                | 0.018  | 0.003 | 6.88E-12 | Yes        | Yes                        |
| rs35747     | 12     | 102912558 | A             | G            | 0.82                | 0.017  | 0.003 | 2.68E-11 | Yes        | Yes                        |
| rs7133378   | 12     | 124409502 | A             | G            | 0.32                | -0.013 | 0.002 | 6.00E-11 | Yes        | No                         |
| rs7975482   | 12     | 124481690 | A             | G            | 0.67                | 0.012  | 0.002 | 1.97E-10 | Yes        | No                         |
| rs12454712  | 18     | 60845884  | T             | C            | 0.58                | 0.014  | 0.003 | 1.78E-09 | No         | No                         |
| rs10422861  | 19     | 33894846  | T             | C            | 0.67                | -0.013 | 0.002 | 6.65E-11 | Yes        | No                         |
| rs731839    | 19     | 33899065  | A             | G            | 0.66                | -0.012 | 0.002 | 3.87E-11 | Yes        | Yes                        |
| rs1999536   | 20     | 45581777  | C             | G            | 0.55                | -0.012 | 0.002 | 1.32E-09 | No         | No                         |
| rs1206760   | 20     | 45582472  | A             | G            | 0.54                | -0.011 | 0.002 | 8.82E-10 | Yes        | Yes                        |

43

44 **Supplemental Table 4. SNPs included in LDL cholesterol-related analyses.**

45

| RSID        | Chrom. | Position  | Effect allele | Other allele | Effect allele freq. | Beta        | SE       | p-value   | Used in MR | Used in MR + Steiger filt. |
|-------------|--------|-----------|---------------|--------------|---------------------|-------------|----------|-----------|------------|----------------------------|
| rs1123571   | 1      | 2326009   | A             | G            | 0.469               | -0.0109643  | 1.30E-06 | 2.78E-11  | Yes        | Yes                        |
| rs1497406   | 1      | 16505320  | G             | A            | 0.584               | 0.0136287   | 1.27E-06 | 6.70E-17  | Yes        | Yes                        |
| rs2992752   | 1      | 18808526  | C             | A            | 0.630               | -0.0101005  | 1.29E-06 | 1.00E-09  | Yes        | No                         |
| rs7551124   | 1      | 23785760  | T             | C            | 0.874               | 0.0168091   | 1.89E-06 | 4.08E-12  | Yes        | No                         |
| rs10903129  | 1      | 25768937  | G             | A            | 0.548               | 0.0258481   | 1.25E-06 | 3.42E-58  | Yes        | Yes                        |
| rs41311276  | 1      | 26387625  | C             | A            | 0.175               | -0.0142915  | 1.66E-06 | 1.93E-11  | Yes        | No                         |
| rs114165349 | 1      | 27021913  | C             | G            | 0.023               | 0.0835384   | 4.17E-06 | 5.60E-55  | Yes        | No                         |
| rs41309280  | 1      | 27688814  | T             | C            | 0.037               | 0.0393643   | 3.43E-06 | 3.08E-19  | Yes        | No                         |
| rs17853159  | 1      | 45810865  | A             | G            | 0.078               | -0.022428   | 2.33E-06 | 6.55E-14  | Yes        | No                         |
| rs143064733 | 1      | 49204135  | A             | G            | 0.002               | -0.138733   | 1.96E-05 | 2.92E-10  | No         | No                         |
| rs570553136 | 1      | 52262405  | G             | A            | 0.003               | -0.166893   | 2.39E-05 | 8.11E-15  | No         | No                         |
| rs140559632 | 1      | 53367652  | C             | T            | 0.003               | -0.13621    | 2.20E-05 | 1.87E-11  | No         | No                         |
| rs191875604 | 1      | 54246772  | C             | T            | 0.002               | -0.193414   | 1.77E-05 | 9.01E-23  | No         | No                         |
| rs11591147  | 1      | 55505647  | T             | G            | 0.016               | -0.433696   | 4.90E-06 | 0         | No         | No                         |
| rs557402933 | 1      | 56339701  | T             | C            | 0.003               | -0.296574   | 1.25E-05 | 7.97E-78  | No         | No                         |
| rs186538116 | 1      | 56840574  | C             | A            | 0.002               | -0.361234   | 2.28E-05 | 7.06E-60  | No         | No                         |
| rs754633424 | 1      | 57390571  | T             | C            | 0.000               | -0.734975   | 0.000132 | 1.42E-13  | No         | No                         |
| rs145440120 | 1      | 58137322  | C             | T            | 0.000               | -0.870101   | 0.000188 | 2.78E-10  | No         | No                         |
| rs17121798  | 1      | 61675857  | G             | C            | 0.074               | -0.0180307  | 2.39E-06 | 4.41E-09  | Yes        | No                         |
| rs598253    | 1      | 62911341  | C             | T            | 0.338               | -0.0421113  | 1.35E-06 | 2.05E-130 | Yes        | No                         |
| rs566523636 | 1      | 63421381  | A             | C            | 0.000               | -0.449938   | 8.41E-05 | 2.12E-10  | No         | No                         |
| rs2391159   | 1      | 92971951  | C             | T            | 0.793               | 0.0234181   | 1.55E-06 | 5.29E-32  | Yes        | No                         |
| rs111232683 | 1      | 107566149 | C             | G            | 0.343               | 0.0135204   | 1.57E-06 | 4.50E-13  | No         | No                         |
| rs115292790 | 1      | 109310728 | A             | G            | 0.014               | -0.0563927  | 5.50E-06 | 1.20E-15  | Yes        | No                         |
| rs12740374  | 1      | 109817590 | T             | G            | 0.219               | -0.148228   | 1.50E-06 | 0         | Yes        | Yes                        |
| rs140266316 | 1      | 110326545 | A             | G            | 0.016               | -0.0577088  | 5.40E-06 | 7.21E-17  | Yes        | No                         |
| rs267733    | 1      | 150958836 | G             | A            | 0.156               | -0.0187116  | 1.72E-06 | 1.95E-17  | Yes        | No                         |
| rs184980867 | 1      | 151658543 | A             | G            | 0.003               | -0.112638   | 1.24E-05 | 4.40E-13  | No         | No                         |
| rs4390169   | 1      | 155106054 | G             | A            | 0.515               | -0.0119697  | 1.25E-06 | 8.06E-14  | Yes        | No                         |
| rs12045893  | 1      | 158530416 | T             | C            | 0.248               | 0.0108397   | 1.44E-06 | 4.80E-09  | Yes        | No                         |
| rs115383270 | 1      | 161531340 | A             | G            | 0.073               | 0.0193347   | 2.52E-06 | 1.22E-09  | Yes        | No                         |
| rs76900682  | 1      | 174064560 | A             | G            | 0.154               | 0.0129041   | 1.77E-06 | 1.45E-08  | Yes        | No                         |
| rs6682862   | 1      | 177938437 | A             | G            | 0.164               | -0.0137009  | 1.70E-06 | 3.23E-10  | Yes        | No                         |
| rs1689801   | 1      | 182165484 | A             | G            | 0.325               | 0.0144266   | 1.33E-06 | 3.44E-17  | Yes        | No                         |
| rs2296288   | 1      | 183072590 | C             | T            | 0.563               | 0.0113161   | 1.27E-06 | 3.51E-12  | Yes        | Yes                        |
| rs1434282   | 1      | 199010721 | T             | C            | 0.723               | 0.0109297   | 1.42E-06 | 1.95E-09  | Yes        | No                         |
| rs2642438   | 1      | 220970028 | G             | A            | 0.706               | 0.0268921   | 1.38E-06 | 2.22E-52  | Yes        | No                         |
| rs7519734   | 1      | 224549524 | C             | T            | 0.223               | -0.0111937  | 1.51E-06 | 8.38E-09  | Yes        | No                         |
| rs553427    | 1      | 234852760 | T             | C            | 0.527               | 0.0403134   | 1.27E-06 | 2.56E-135 | Yes        | Yes                        |
| rs3935011   | 1      | 246891269 | C             | T            | 0.480               | 0.00893719  | 1.26E-06 | 3.46E-08  | Yes        | Yes                        |
| rs3820897   | 2      | 3642361   | C             | T            | 0.808               | -0.0159195  | 1.61E-06 | 7.46E-15  | Yes        | No                         |
| rs67269656  | 2      | 8720038   | T             | C            | 0.265               | -0.0103803  | 1.42E-06 | 1.19E-08  | Yes        | No                         |
| rs7556983   | 2      | 17955255  | A             | G            | 0.104               | -0.015424   | 2.06E-06 | 5.03E-09  | Yes        | Yes                        |
| rs79279183  | 2      | 20370641  | C             | A            | 0.498               | -0.0180442  | 1.43E-06 | 1.46E-25  | No         | No                         |
| rs934197    | 2      | 21267461  | A             | G            | 0.330               | 0.0962978   | 1.33E-06 | 0         | Yes        | No                         |
| rs191450029 | 2      | 21942500  | C             | G            | 0.000               | 0.79929     | 0.000102 | 1.65E-20  | No         | No                         |
| rs541138574 | 2      | 22812173  | T             | C            | 0.001               | 0.260383    | 3.77E-05 | 9.14E-12  | No         | No                         |
| rs150520162 | 2      | 23541654  | T             | C            | 1.000               | 0.860271    | 0.000155 | 1.70E-09  | No         | No                         |
| rs142787485 | 2      | 26358156  | G             | A            | 0.036               | -0.0285729  | 3.60E-06 | 5.46E-10  | Yes        | No                         |
| rs13394970  | 2      | 26929282  | G             | T            | 0.602               | 0.00952916  | 1.29E-06 | 7.95E-09  | Yes        | No                         |
| rs1260326   | 2      | 27730940  | C             | T            | 0.610               | -0.0306622  | 1.28E-06 | 8.90E-78  | Yes        | No                         |
| rs141647229 | 2      | 43473222  | C             | G            | 0.008               | -0.0826827  | 7.29E-06 | 6.60E-19  | No         | No                         |
| rs4299376   | 2      | 44072576  | T             | G            | 0.691               | -0.0700085  | 1.37E-06 | 0         | Yes        | Yes                        |
| rs140879085 | 2      | 44663302  | T             | C            | 0.011               | -0.097038   | 6.70E-06 | 1.09E-29  | Yes        | No                         |
| rs12712955  | 2      | 46166321  | G             | A            | 0.503               | -0.0114588  | 1.26E-06 | 1.20E-12  | Yes        | No                         |
| rs4671050   | 2      | 62988169  | T             | G            | 0.320               | -0.0223969  | 1.36E-06 | 6.35E-38  | Yes        | Yes                        |
| rs954680    | 2      | 64913045  | G             | C            | 0.702               | 0.0123572   | 1.39E-06 | 3.84E-12  | Yes        | Yes                        |
| rs10206764  | 2      | 70549961  | C             | T            | 0.407               | 0.010666    | 1.29E-06 | 1.20E-10  | Yes        | No                         |
| rs11887443  | 2      | 85879041  | T             | G            | 0.263               | -0.0124671  | 1.70E-06 | 8.89E-10  | No         | No                         |
| rs2970901   | 2      | 88428834  | T             | G            | 0.459               | 0.00969091  | 1.27E-06 | 2.83E-09  | Yes        | Yes                        |
| rs10185855  | 2      | 101642260 | G             | A            | 0.361               | -0.0129858  | 1.29E-06 | 5.29E-15  | Yes        | Yes                        |
| rs1992172   | 2      | 109093836 | G             | A            | 0.194               | 0.019503    | 1.59E-06 | 9.42E-22  | Yes        | Yes                        |
| rs6734238   | 2      | 113841030 | G             | A            | 0.407               | -0.00932154 | 1.27E-06 | 1.07E-08  | Yes        | No                         |
| rs115626828 | 2      | 118224104 | C             | G            | 0.021               | -0.041072   | 5.01E-06 | 1.54E-10  | Yes        | No                         |

|             |   |           |         |    |       |             |          |           |     |     |
|-------------|---|-----------|---------|----|-------|-------------|----------|-----------|-----|-----|
| rs150474434 | 2 | 118845121 | A       | G  | 0.095 | -0.0423421  | 2.15E-06 | 3.34E-53  | Yes | No  |
| rs17050272  | 2 | 121306440 | A       | G  | 0.421 | -0.0228383  | 1.33E-06 | 2.37E-42  | No  | No  |
| rs10928512  | 2 | 135451302 | T       | G  | 0.601 | -0.0107469  | 1.32E-06 | 1.83E-10  | Yes | No  |
| rs1375131   | 2 | 135954797 | C       | T  | 0.313 | 0.0195868   | 1.66E-06 | 1.09E-22  | No  | No  |
| rs12614487  | 2 | 158434569 | T       | C  | 0.074 | -0.026633   | 2.38E-06 | 2.62E-18  | Yes | No  |
| rs10184004  | 2 | 165508389 | T       | C  | 0.413 | -0.0104874  | 1.27E-06 | 1.29E-10  | Yes | No  |
| rs10184673  | 2 | 169827796 | A       | G  | 0.595 | -0.0220445  | 1.29E-06 | 1.03E-40  | Yes | No  |
| rs12693968  | 2 | 203302627 | A       | G  | 0.258 | 0.0212882   | 1.44E-06 | 1.28E-30  | Yes | Yes |
| rs1250259   | 2 | 216300482 | A       | T  | 0.736 | 0.0176512   | 1.44E-06 | 1.07E-21  | Yes | No  |
| rs78058190  | 2 | 219699999 | A       | G  | 0.052 | 0.0239644   | 3.30E-06 | 9.58E-09  | No  | No  |
| rs6431630   | 2 | 234677386 | A       | G  | 0.105 | 0.0241194   | 2.03E-06 | 2.53E-20  | Yes | Yes |
| rs13076933  | 3 | 12327431  | G       | T  | 0.257 | -0.0245071  | 1.44E-06 | 4.73E-40  | Yes | No  |
| rs6792725   | 3 | 24520283  | G       | A  | 0.681 | -0.015304   | 1.42E-06 | 2.56E-17  | No  | No  |
| rs9837622   | 3 | 32514647  | A       | T  | 0.073 | -0.0370846  | 2.44E-06 | 2.22E-32  | Yes | Yes |
| rs13621     | 3 | 52558133  | C       | T  | 0.462 | 0.010972    | 1.26E-06 | 1.17E-11  | Yes | No  |
| rs71311871  | 3 | 58420613  | G       | A  | 0.081 | -0.0379602  | 2.27E-06 | 1.01E-38  | Yes | No  |
| rs55921103  | 3 | 69810294  | T       | G  | 0.641 | 0.0126185   | 1.34E-06 | 1.63E-13  | Yes | No  |
| rs3732359   | 3 | 119536429 | A       | G  | 0.770 | -0.0148565  | 1.48E-06 | 5.78E-15  | Yes | No  |
| rs68028452  | 3 | 122285218 | C       | CT | 0.302 | 0.018998    | 1.60E-06 | 4.77E-23  | No  | No  |
| rs2011442   | 3 | 124959834 | T       | C  | 0.661 | 0.0120962   | 1.34E-06 | 1.95E-12  | Yes | Yes |
| rs9862203   | 3 | 126058362 | G       | A  | 0.760 | 0.0131919   | 1.47E-06 | 2.69E-12  | Yes | Yes |
| rs62264113  | 3 | 127292333 | A       | G  | 0.110 | 0.0144742   | 2.03E-06 | 2.67E-08  | Yes | No  |
| rs56299595  | 3 | 129278182 | G       | A  | 0.125 | 0.0182263   | 1.91E-06 | 9.60E-14  | Yes | No  |
| rs74341202  | 3 | 132183991 | A       | G  | 0.050 | -0.0425579  | 2.92E-06 | 4.21E-30  | Yes | No  |
| rs523118    | 3 | 135965888 | G       | T  | 0.789 | 0.0144134   | 1.60E-06 | 2.00E-12  | Yes | No  |
| rs9653945   | 3 | 142660706 | A       | G  | 0.347 | -0.012963   | 1.31E-06 | 1.30E-14  | Yes | No  |
| rs76440173  | 3 | 155546124 | T       | C  | 0.005 | 0.0817026   | 1.06E-05 | 1.42E-10  | No  | No  |
| rs6441313   | 3 | 160036400 | G       | A  | 0.537 | -0.0125638  | 1.28E-06 | 1.80E-14  | Yes | Yes |
| rs56118251  | 3 | 171534525 | G       | A  | 0.157 | 0.0136844   | 1.70E-06 | 3.84E-10  | Yes | No  |
| rs397726270 | 3 | 195942080 | TG      | T  | 0.574 | -0.0116888  | 1.56E-06 | 2.72E-10  | No  | No  |
| rs13108218  | 4 | 3443931   | G       | A  | 0.615 | -0.0182714  | 1.33E-06 | 4.28E-27  | Yes | No  |
| rs4689653   | 4 | 7223319   | G       | T  | 0.617 | 0.0112429   | 1.31E-06 | 1.50E-11  | Yes | No  |
| rs79623641  | 4 | 39999404  | A       | G  | 0.068 | -0.0179333  | 2.58E-06 | 4.14E-08  | Yes | No  |
| rs112575086 | 4 | 54429890  | T       | C  | 0.120 | -0.0139398  | 1.92E-06 | 1.66E-08  | Yes | No  |
| rs4860987   | 4 | 69491284  | T       | A  | 0.248 | 0.0317757   | 1.75E-06 | 4.68E-49  | No  | No  |
| rs187479321 | 4 | 70264840  | G       | A  | 0.004 | -0.0812608  | 1.00E-05 | 2.44E-10  | No  | No  |
| rs530082542 | 4 | 71474948  | C       | G  | 0.002 | 0.172365    | 3.00E-05 | 4.38E-10  | No  | No  |
| rs938075289 | 4 | 72754788  | C       | A  | 0.001 | 0.323714    | 2.88E-05 | 1.61E-33  | No  | No  |
| rs537526354 | 4 | 73491622  | A       | G  | 0.002 | 0.399372    | 2.69E-05 | 3.93E-57  | No  | No  |
| rs187918276 | 4 | 74033564  | C       | G  | 0.001 | 0.467202    | 2.26E-05 | 5.20E-78  | No  | No  |
| rs181372486 | 4 | 74793806  | A       | G  | 0.002 | 0.344759    | 2.41E-05 | 4.05E-49  | No  | No  |
| rs189087436 | 4 | 75416194  | C       | T  | 0.002 | 0.242217    | 2.03E-05 | 4.41E-26  | No  | No  |
| rs60117481  | 4 | 77420598  | GTATAAC | G  | 0.653 | -0.00999555 | 1.49E-06 | 3.06E-08  | No  | No  |
| rs342467    | 4 | 88052219  | C       | T  | 0.601 | 0.0101553   | 1.28E-06 | 6.24E-10  | Yes | No  |
| rs144198753 | 4 | 99713350  | T       | C  | 0.010 | -0.0555826  | 6.74E-06 | 1.18E-10  | No  | No  |
| rs28497720  | 4 | 100487370 | T       | C  | 0.251 | -0.0175436  | 1.44E-06 | 2.15E-21  | Yes | No  |
| rs13107325  | 4 | 103188709 | T       | C  | 0.064 | -0.0251333  | 2.51E-06 | 6.65E-15  | Yes | No  |
| rs17617028  | 4 | 106064683 | A       | G  | 0.217 | 0.0132543   | 1.51E-06 | 8.06E-12  | Yes | No  |
| rs28471982  | 4 | 110918687 | G       | A  | 0.372 | -0.00915595 | 1.30E-06 | 4.05E-08  | Yes | No  |
| rs138204164 | 4 | 120123417 | G       | C  | 0.132 | -0.0145038  | 1.86E-06 | 1.20E-09  | Yes | No  |
| rs2085723   | 4 | 151206057 | T       | G  | 0.649 | 0.00980493  | 1.31E-06 | 5.70E-09  | Yes | No  |
| rs41280463  | 4 | 154191226 | A       | G  | 0.167 | -0.0152278  | 1.67E-06 | 1.42E-12  | Yes | No  |
| rs6054      | 4 | 155489608 | T       | C  | 0.005 | 0.124754    | 1.01E-05 | 3.68E-23  | No  | No  |
| rs72701754  | 4 | 185251995 | T       | A  | 0.404 | 0.0091812   | 1.31E-06 | 3.45E-08  | Yes | No  |
| rs116734477 | 4 | 52095024  | T       | C  | 0.038 | -0.0511426  | 3.30E-06 | 1.50E-33  | Yes | No  |
| rs13173241  | 5 | 55861359  | A       | G  | 0.195 | 0.0156087   | 1.57E-06 | 8.74E-15  | Yes | No  |
| rs3010275   | 5 | 72014761  | G       | T  | 0.210 | -0.0183321  | 1.53E-06 | 1.36E-20  | Yes | No  |
| rs12916     | 5 | 74656539  | C       | T  | 0.402 | 0.0700561   | 1.27E-06 | 0         | Yes | Yes |
| rs139733342 | 5 | 75241150  | CT      | C  | 0.085 | -0.0253779  | 2.67E-06 | 3.63E-15  | No  | No  |
| rs6869845   | 5 | 122833703 | T       | C  | 0.549 | 0.0167463   | 1.26E-06 | 4.75E-25  | Yes | No  |
| rs11745587  | 5 | 131796922 | A       | G  | 0.355 | 0.0162122   | 1.31E-06 | 5.00E-22  | Yes | Yes |
| rs10037298  | 5 | 139567696 | G       | T  | 0.213 | -0.0130198  | 1.93E-06 | 4.33E-09  | Yes | No  |
| rs11167778  | 5 | 141888881 | T       | C  | 0.107 | 0.0218031   | 2.03E-06 | 5.54E-17  | Yes | Yes |
| rs17053386  | 5 | 155709100 | A       | G  | 0.023 | 0.0331219   | 4.50E-06 | 8.95E-09  | Yes | No  |
| rs12657266  | 5 | 156396003 | T       | C  | 0.635 | 0.0353193   | 1.30E-06 | 4.31E-100 | Yes | No  |
| rs352942    | 5 | 176528386 | A       | G  | 0.252 | -0.0104223  | 1.48E-06 | 3.60E-08  | Yes | No  |
| rs59408219  | 6 | 11850754  | C       | T  | 0.076 | -0.0223639  | 2.37E-06 | 2.18E-13  | No  | No  |
| rs2235215   | 6 | 16131156  | C       | T  | 0.321 | -0.0318004  | 1.34E-06 | 2.46E-76  | Yes | No  |
| rs6940342   | 6 | 21381568  | C       | T  | 0.625 | 0.00925897  | 1.29E-06 | 2.28E-08  | Yes | Yes |
| rs113760175 | 6 | 22343592  | A       | G  | 0.065 | -0.0200291  | 2.58E-06 | 1.19E-09  | Yes | No  |
| rs116272812 | 6 | 25452783  | C       | T  | 0.121 | -0.0226615  | 1.92E-06 | 4.26E-20  | Yes | No  |
| rs1800562   | 6 | 26093141  | A       | G  | 0.068 | -0.0571711  | 2.49E-06 | 1.28E-71  | Yes | No  |

|             |   |           |    |       |       |             |          |           |     |     |
|-------------|---|-----------|----|-------|-------|-------------|----------|-----------|-----|-----|
| rs35657082  | 6 | 27067657  | T  | A     | 0.077 | -0.0324863  | 2.42E-06 | 1.07E-25  | No  | No  |
| rs3118362   | 6 | 28785085  | T  | C     | 0.916 | 0.0249093   | 2.47E-06 | 2.03E-15  | No  | No  |
| rs2517671   | 6 | 29937977  | G  | A     | 0.407 | 0.0151548   | 1.40E-06 | 2.14E-18  | Yes | No  |
| rs1265097   | 6 | 31106459  | A  | C     | 0.095 | 0.0289453   | 2.16E-06 | 1.30E-25  | Yes | No  |
| rs7774197   | 6 | 32046275  | C  | A     | 0.064 | 0.0350273   | 2.73E-06 | 7.72E-25  | Yes | Yes |
| rs6689      | 6 | 32627700  | G  | A     | 0.203 | 0.0389564   | 1.72E-06 | 1.20E-70  | Yes | No  |
| rs3800461   | 6 | 34616322  | C  | G     | 0.119 | -0.0244376  | 1.93E-06 | 5.20E-23  | Yes | No  |
| rs11754612  | 6 | 35476562  | A  | T     | 0.115 | -0.0148612  | 2.01E-06 | 7.00E-09  | Yes | No  |
| rs11380614  | 6 | 37037818  | TA | T     | 0.516 | -0.0124344  | 1.45E-06 | 8.54E-13  | No  | No  |
| rs11759627  | 6 | 39238772  | T  | C     | 0.320 | 0.00971594  | 1.34E-06 | 1.67E-08  | Yes | No  |
| rs2395943   | 6 | 42940673  | G  | A     | 0.586 | -0.0134641  | 1.26E-06 | 1.02E-16  | Yes | No  |
| rs9472125   | 6 | 43756169  | T  | C     | 0.111 | -0.0155888  | 2.17E-06 | 1.54E-08  | No  | No  |
| rs17665178  | 6 | 52435243  | G  | C     | 0.302 | -0.0158917  | 1.42E-06 | 1.40E-18  | Yes | No  |
| rs12662589  | 6 | 53509035  | C  | G     | 0.259 | 0.015299    | 1.43E-06 | 6.98E-17  | Yes | Yes |
| rs9496567   | 6 | 100602753 | A  | G     | 0.236 | -0.0209744  | 1.48E-06 | 2.80E-28  | Yes | Yes |
| rs62419249  | 6 | 101447338 | A  | G     | 0.478 | 0.0121051   | 1.27E-06 | 9.27E-14  | Yes | No  |
| rs4946713   | 6 | 106374015 | A  | C     | 0.447 | -0.0112055  | 1.26E-06 | 4.56E-12  | Yes | Yes |
| rs11153143  | 6 | 109300661 | T  | C     | 0.126 | -0.0144056  | 1.94E-06 | 4.72E-09  | Yes | No  |
| rs1556857   | 6 | 116325559 | C  | T     | 0.407 | -0.0168848  | 1.27E-06 | 3.72E-25  | Yes | Yes |
| rs9388498   | 6 | 126873423 | T  | G     | 0.190 | -0.0150019  | 1.71E-06 | 5.68E-12  | No  | No  |
| rs67822704  | 6 | 130386212 | G  | GGAGA | 0.678 | 0.0112973   | 1.54E-06 | 1.14E-09  | No  | No  |
| rs9399137   | 6 | 135419018 | C  | T     | 0.262 | -0.0255597  | 1.43E-06 | 3.16E-44  | Yes | No  |
| rs72974722  | 6 | 139331419 | C  | A     | 0.177 | 0.0211309   | 1.66E-06 | 4.12E-23  | Yes | No  |
| rs635769    | 6 | 139831981 | C  | T     | 0.619 | -0.00977103 | 1.29E-06 | 3.20E-09  | Yes | No  |
| rs9480534   | 6 | 151015562 | G  | A     | 0.092 | -0.0169154  | 2.18E-06 | 1.56E-09  | Yes | No  |
| rs1871859   | 6 | 151898506 | T  | C     | 0.130 | 0.0184903   | 1.86E-06 | 1.03E-14  | Yes | Yes |
| rs9347330   | 6 | 159984784 | A  | T     | 0.337 | 0.0104853   | 1.36E-06 | 1.84E-09  | Yes | No  |
| rs2297359   | 6 | 160492613 | C  | T     | 0.015 | 0.117683    | 5.31E-06 | 4.17E-67  | Yes | No  |
| rs10455872  | 6 | 161010118 | G  | A     | 0.069 | 0.113763    | 2.47E-06 | 3.86E-282 | Yes | Yes |
| rs148349043 | 6 | 161659369 | G  | C     | 0.014 | 0.0847064   | 5.55E-06 | 1.28E-32  | Yes | No  |
| rs10272002  | 7 | 1047615   | G  | A     | 0.210 | -0.0223057  | 1.55E-06 | 2.39E-29  | Yes | No  |
| rs144787122 | 7 | 2296552   | G  | A     | 0.004 | 0.112032    | 1.21E-05 | 2.55E-15  | No  | No  |
| rs55696093  | 7 | 21605973  | G  | A     | 0.211 | 0.0382032   | 1.54E-06 | 1.67E-83  | Yes | No  |
| rs4722551   | 7 | 25991826  | C  | T     | 0.163 | 0.0361336   | 1.68E-06 | 6.05E-63  | Yes | Yes |
| rs12533280  | 7 | 36171953  | T  | C     | 0.195 | 0.0180348   | 1.59E-06 | 8.29E-19  | Yes | Yes |
| rs7808613   | 7 | 41746922  | G  | C     | 0.245 | 0.011275    | 1.48E-06 | 2.52E-09  | Yes | Yes |
| rs28658444  | 7 | 44006213  | C  | G     | 0.014 | 0.0390561   | 5.47E-06 | 2.58E-08  | Yes | No  |
| rs17725246  | 7 | 44581986  | C  | T     | 0.195 | 0.0427777   | 1.63E-06 | 6.38E-95  | Yes | Yes |
| rs799157    | 7 | 73020301  | C  | T     | 0.964 | -0.0317878  | 3.52E-06 | 1.32E-12  | Yes | No  |
| rs2302434   | 7 | 75630183  | T  | C     | 0.174 | 0.0145292   | 1.66E-06 | 9.87E-12  | Yes | Yes |
| rs1014283   | 7 | 87076587  | A  | C     | 0.183 | -0.0136301  | 1.62E-06 | 5.72E-11  | Yes | Yes |
| rs6967728   | 7 | 97915637  | G  | A     | 0.817 | 0.0179411   | 1.66E-06 | 3.09E-17  | Yes | No  |
| rs564449    | 7 | 100321138 | G  | T     | 0.885 | -0.0267236  | 1.98E-06 | 3.27E-26  | Yes | No  |
| rs10248717  | 7 | 107056795 | G  | A     | 0.309 | 0.0125877   | 1.39E-06 | 1.31E-12  | Yes | No  |
| rs62621812  | 7 | 127015083 | A  | G     | 0.024 | 0.0302076   | 4.14E-06 | 1.29E-08  | Yes | No  |
| rs1838931   | 7 | 130455588 | T  | C     | 0.312 | 0.0113437   | 1.38E-06 | 1.37E-10  | Yes | No  |
| rs4374942   | 7 | 155026807 | C  | T     | 0.081 | 0.0199517   | 2.30E-06 | 1.43E-11  | Yes | Yes |
| rs2928576   | 8 | 6600349   | C  | T     | 0.672 | 0.0119763   | 1.33E-06 | 2.65E-12  | Yes | No  |
| rs13256216  | 8 | 8577883   | T  | C     | 0.250 | 0.0125804   | 1.46E-06 | 1.67E-11  | Yes | No  |
| rs9987289   | 8 | 9183358   | G  | A     | 0.908 | 0.0598584   | 2.15E-06 | 7.20E-104 | Yes | No  |
| rs4645567   | 8 | 9723964   | A  | T     | 0.786 | -0.0141477  | 1.54E-06 | 9.02E-13  | Yes | No  |
| rs11250076  | 8 | 10647823  | G  | A     | 0.571 | -0.0100347  | 1.29E-06 | 1.42E-09  | Yes | No  |
| rs9692668   | 8 | 11789933  | A  | C     | 0.556 | 0.0101773   | 1.29E-06 | 7.25E-10  | Yes | No  |
| rs1495741   | 8 | 18272881  | A  | G     | 0.779 | -0.021999   | 1.50E-06 | 2.17E-30  | Yes | No  |
| rs769111033 | 8 | 19855858  | A  | ATTTT | 0.232 | -0.0215664  | 5.14E-06 | 6.39E-09  | No  | No  |
| rs900776    | 8 | 21918089  | C  | A     | 0.170 | -0.0195692  | 1.69E-06 | 1.99E-19  | Yes | No  |
| rs117139027 | 8 | 29024943  | A  | G     | 0.013 | -0.0782787  | 6.18E-06 | 6.06E-26  | No  | No  |
| rs9298506   | 8 | 55437524  | G  | A     | 0.208 | 0.0245553   | 1.54E-06 | 1.69E-35  | Yes | Yes |
| rs9297994   | 8 | 59392324  | A  | G     | 0.662 | -0.0355062  | 1.32E-06 | 1.94E-97  | Yes | Yes |
| rs12114596  | 8 | 61518399  | T  | C     | 0.347 | 0.0117407   | 1.57E-06 | 3.15E-10  | No  | No  |
| rs62509311  | 8 | 74907295  | T  | A     | 0.279 | -0.0152619  | 1.41E-06 | 3.00E-17  | No  | No  |
| rs400824    | 8 | 81357702  | T  | C     | 0.290 | 0.0103308   | 1.40E-06 | 8.16E-09  | Yes | No  |
| rs2737245   | 8 | 116658583 | T  | G     | 0.277 | -0.0253718  | 1.40E-06 | 2.33E-45  | Yes | Yes |
| rs28601761  | 8 | 126500031 | G  | C     | 0.422 | -0.0649002  | 1.29E-06 | 0         | No  | No  |
| rs11787335  | 8 | 145044104 | T  | C     | 0.355 | 0.0231214   | 1.33E-06 | 2.80E-42  | Yes | No  |
| rs3780181   | 9 | 2640759   | G  | A     | 0.070 | -0.0358747  | 2.49E-06 | 3.11E-29  | Yes | Yes |
| rs28498684  | 9 | 16900695  | G  | A     | 0.600 | -0.0131553  | 1.29E-06 | 1.18E-15  | Yes | No  |
| rs12551960  | 9 | 19267440  | T  | C     | 0.079 | 0.0349877   | 2.39E-06 | 3.47E-30  | Yes | No  |
| rs10757273  | 9 | 22090301  | A  | C     | 0.443 | -0.0140171  | 1.49E-06 | 4.72E-15  | No  | No  |
| rs7864568   | 9 | 78212428  | G  | A     | 0.684 | 0.0155516   | 1.43E-06 | 6.51E-18  | Yes | Yes |
| rs1571791   | 9 | 78729213  | C  | T     | 0.620 | -0.0138569  | 1.29E-06 | 7.20E-17  | Yes | No  |
| rs142550358 | 9 | 91392686  | T  | TTC   | 0.054 | -0.0242448  | 3.27E-06 | 7.79E-10  | No  | No  |

|             |    |           |      |    |       |            |          |           |     |     |
|-------------|----|-----------|------|----|-------|------------|----------|-----------|-----|-----|
| rs2740488   | 9  | 107661742 | C    | A  | 0.261 | -0.0249217 | 1.43E-06 | 3.35E-42  | Yes | No  |
| rs56294298  | 9  | 117133524 | A    | G  | 0.085 | -0.0183291 | 2.36E-06 | 1.34E-09  | Yes | No  |
| rs13289095  | 9  | 131466489 | T    | G  | 0.137 | -0.0288711 | 1.87E-06 | 1.05E-33  | No  | No  |
| rs2519093   | 9  | 136141870 | T    | C  | 0.188 | 0.0724494  | 1.58E-06 | 7.20E-279 | Yes | No  |
| rs13301660  | 9  | 139340802 | T    | C  | 0.270 | -0.0156411 | 1.42E-06 | 7.26E-18  | Yes | No  |
| rs7903259   | 10 | 17259642  | G    | C  | 0.416 | 0.0163158  | 1.30E-06 | 3.65E-23  | Yes | No  |
| rs41274050  | 10 | 52573772  | T    | C  | 0.009 | 0.070494   | 7.41E-06 | 5.00E-15  | No  | No  |
| rs10761750  | 10 | 65128619  | A    | G  | 0.483 | 0.0141123  | 1.26E-06 | 2.16E-18  | Yes | No  |
| rs17476364  | 10 | 71094504  | C    | T  | 0.099 | -0.0268457 | 2.10E-06 | 2.53E-23  | Yes | No  |
| rs11000443  | 10 | 74665640  | A    | C  | 0.043 | -0.0214412 | 3.06E-06 | 4.70E-08  | Yes | No  |
| rs1870140   | 10 | 82246749  | G    | A  | 0.843 | 0.0124748  | 1.74E-06 | 2.10E-08  | Yes | No  |
| rs477418    | 10 | 89805410  | A    | C  | 0.033 | -0.0253606 | 3.46E-06 | 1.08E-08  | Yes | No  |
| rs2068888   | 10 | 94839642  | A    | G  | 0.451 | -0.0180327 | 1.26E-06 | 5.95E-29  | Yes | No  |
| rs61886346  | 10 | 96101364  | T    | C  | 0.061 | -0.0192465 | 2.63E-06 | 1.15E-08  | Yes | No  |
| rs603424    | 10 | 102075479 | A    | G  | 0.169 | 0.0158621  | 1.70E-06 | 3.38E-13  | Yes | No  |
| rs2792751   | 10 | 113940329 | C    | T  | 0.719 | -0.023866  | 1.38E-06 | 2.03E-41  | Yes | No  |
| rs7079542   | 10 | 115794898 | G    | A  | 0.120 | -0.0156888 | 1.97E-06 | 3.44E-10  | Yes | No  |
| rs2301179   | 10 | 118404620 | G    | A  | 0.508 | 0.0158997  | 1.26E-06 | 7.02E-23  | Yes | Yes |
| rs7904973   | 10 | 124693587 | T    | G  | 0.576 | 0.0209679  | 1.27E-06 | 5.30E-38  | Yes | No  |
| rs151191319 | 11 | 1081287   | A    | G  | 0.033 | -0.0308281 | 3.48E-06 | 5.36E-12  | Yes | No  |
| rs7124487   | 11 | 2988323   | T    | C  | 0.186 | -0.011576  | 1.64E-06 | 3.90E-08  | Yes | No  |
| rs188513096 | 11 | 4993424   | A    | T  | 0.001 | -0.194759  | 2.75E-05 | 7.40E-11  | No  | No  |
| rs11601507  | 11 | 5701074   | A    | C  | 0.070 | 0.0404129  | 3.46E-06 | 3.97E-28  | Yes | No  |
| rs10832956  | 11 | 18645668  | C    | T  | 0.728 | 0.0208132  | 1.41E-06 | 8.07E-31  | Yes | Yes |
| rs61882680  | 11 | 46370636  | T    | C  | 0.030 | -0.0279637 | 3.70E-06 | 4.07E-09  | Yes | No  |
| rs174547    | 11 | 61570783  | C    | T  | 0.346 | -0.0429432 | 1.31E-06 | 2.21E-143 | Yes | No  |
| rs7950543   | 11 | 63599440  | C    | T  | 0.370 | 0.0114755  | 1.34E-06 | 1.67E-11  | Yes | No  |
| rs642803    | 11 | 65560620  | T    | C  | 0.456 | 0.0101855  | 1.27E-06 | 3.58E-10  | Yes | No  |
| rs117777720 | 11 | 66196384  | T    | C  | 0.241 | -0.0147267 | 1.46E-06 | 4.79E-15  | Yes | No  |
| rs78643851  | 11 | 69706362  | G    | T  | 0.979 | -0.0348153 | 4.91E-06 | 2.37E-08  | No  | No  |
| rs11237488  | 11 | 78128775  | T    | C  | 0.128 | -0.0134092 | 1.91E-06 | 4.63E-08  | Yes | No  |
| rs11226108  | 11 | 103870755 | C    | G  | 0.191 | -0.0142732 | 1.62E-06 | 7.33E-12  | Yes | No  |
| rs964184    | 11 | 116648917 | C    | G  | 0.865 | -0.0552411 | 1.82E-06 | 1.41E-123 | Yes | No  |
| rs116987336 | 11 | 117175658 | A    | G  | 0.027 | 0.0359014  | 4.17E-06 | 1.08E-11  | Yes | No  |
| rs4639966   | 11 | 118573519 | C    | T  | 0.241 | 0.0147037  | 1.46E-06 | 3.93E-15  | Yes | Yes |
| rs3862606   | 11 | 121330087 | G    | A  | 0.448 | 0.00990989 | 1.31E-06 | 2.44E-09  | Yes | No  |
| rs10790519  | 11 | 122535408 | C    | T  | 0.385 | 0.015594   | 1.29E-06 | 3.68E-21  | Yes | No  |
| rs112771035 | 11 | 126225876 | G    | C  | 0.069 | 0.0626229  | 2.45E-06 | 1.63E-88  | Yes | No  |
| rs35882350  | 12 | 623129    | G    | A  | 0.256 | 0.0181651  | 1.48E-06 | 4.64E-22  | No  | No  |
| rs76895963  | 12 | 4384844   | G    | T  | 0.018 | -0.0544743 | 5.09E-06 | 6.02E-17  | No  | No  |
| rs145920606 | 12 | 7627311   | G    | A  | 0.081 | -0.0166614 | 2.34E-06 | 2.79E-08  | Yes | No  |
| rs149871778 | 12 | 9098995   | GAAC | G  | 0.104 | -0.0272823 | 2.34E-06 | 4.28E-22  | No  | No  |
| rs75667995  | 12 | 25409070  | C    | T  | 0.068 | -0.0291431 | 2.46E-06 | 2.93E-20  | Yes | No  |
| rs11175540  | 12 | 40586295  | A    | T  | 0.066 | 0.0260974  | 2.60E-06 | 2.41E-15  | Yes | No  |
| rs2250751   | 12 | 51106178  | A    | G  | 0.341 | -0.0165291 | 1.34E-06 | 4.00E-22  | Yes | No  |
| rs61177162  | 12 | 51779544  | A    | AG | 0.502 | -0.0160938 | 1.66E-06 | 9.46E-17  | No  | No  |
| rs74090765  | 12 | 53792914  | G    | T  | 0.173 | 0.0144654  | 1.66E-06 | 9.48E-12  | Yes | No  |
| rs11172134  | 12 | 57645789  | A    | T  | 0.208 | -0.0147456 | 1.56E-06 | 1.59E-13  | Yes | No  |
| rs61754230  | 12 | 72179446  | T    | C  | 0.016 | 0.0491427  | 5.48E-06 | 1.42E-13  | No  | No  |
| rs12306780  | 12 | 89921860  | T    | A  | 0.342 | 0.0115655  | 1.33E-06 | 9.04E-12  | Yes | No  |
| rs1515565   | 12 | 92818786  | G    | A  | 0.518 | 0.00927654 | 1.26E-06 | 8.47E-09  | Yes | No  |
| rs11837065  | 12 | 100859983 | T    | C  | 0.366 | -0.0111241 | 1.33E-06 | 6.73E-11  | Yes | Yes |
| rs978458    | 12 | 102802239 | C    | T  | 0.737 | -0.0119449 | 1.43E-06 | 7.09E-11  | Yes | No  |
| rs1196760   | 12 | 105606068 | C    | G  | 0.908 | -0.0202432 | 2.21E-06 | 9.99E-13  | Yes | Yes |
| rs11114055  | 12 | 109169137 | C    | T  | 0.311 | 0.0132504  | 1.36E-06 | 3.52E-14  | Yes | No  |
| rs4766519   | 12 | 111370980 | T    | C  | 0.521 | 0.0112003  | 1.28E-06 | 7.50E-12  | Yes | No  |
| rs3184504   | 12 | 111884608 | C    | T  | 0.527 | 0.0234144  | 1.26E-06 | 9.10E-48  | Yes | No  |
| rs11066412  | 12 | 113218868 | A    | G  | 0.270 | -0.0139136 | 1.44E-06 | 5.17E-14  | Yes | No  |
| rs2516079   | 12 | 120859188 | G    | T  | 0.287 | 0.0103971  | 1.42E-06 | 9.51E-09  | Yes | No  |
| rs1169288   | 12 | 121416650 | C    | A  | 0.322 | 0.0358725  | 1.34E-06 | 5.27E-96  | Yes | Yes |
| rs2247139   | 12 | 122380274 | G    | A  | 0.868 | -0.0132285 | 1.84E-06 | 2.29E-08  | Yes | No  |
| rs28461471  | 12 | 123856974 | A    | G  | 0.904 | -0.0221249 | 2.47E-06 | 9.80E-14  | No  | No  |
| rs2451322   | 12 | 124545515 | A    | G  | 0.595 | 0.0106423  | 1.29E-06 | 1.02E-10  | Yes | No  |
| rs11057840  | 12 | 125316055 | C    | A  | 0.138 | 0.0218994  | 1.82E-06 | 5.32E-21  | Yes | No  |
| rs75588192  | 12 | 133048600 | A    | G  | 0.140 | 0.0164726  | 2.03E-06 | 1.99E-11  | Yes | No  |
| rs368213791 | 13 | 32976656  | G    | GC | 0.482 | -0.0227156 | 1.48E-06 | 2.60E-37  | No  | No  |
| rs17532371  | 13 | 41635301  | G    | C  | 0.071 | -0.0193589 | 2.44E-06 | 6.89E-10  | Yes | No  |
| rs9592980   | 13 | 74855425  | A    | G  | 0.585 | 0.0095033  | 1.29E-06 | 7.55E-09  | Yes | Yes |
| rs7330899   | 13 | 95223400  | A    | G  | 0.244 | 0.0143148  | 1.45E-06 | 1.59E-14  | Yes | Yes |
| rs4771674   | 13 | 111039070 | G    | A  | 0.619 | 0.0140486  | 1.31E-06 | 5.20E-17  | Yes | No  |
| rs6602909   | 13 | 114551993 | C    | T  | 0.330 | 0.0211903  | 1.38E-06 | 1.01E-33  | Yes | No  |
| rs11621792  | 14 | 24871926  | T    | C  | 0.449 | 0.0219774  | 1.29E-06 | 1.21E-40  | Yes | No  |



|              |    |           |    |    |       |             |          |           |     |     |
|--------------|----|-----------|----|----|-------|-------------|----------|-----------|-----|-----|
| rs139262716  | 14 | 31725111  | A  | G  | 0.019 | -0.0386898  | 4.81E-06 | 3.65E-10  | Yes | No  |
| rs11846704   | 14 | 35186694  | T  | C  | 0.267 | -0.0137613  | 1.41E-06 | 3.12E-14  | Yes | No  |
| rs12897637   | 14 | 64239351  | C  | T  | 0.160 | 0.015518    | 1.72E-06 | 1.78E-12  | Yes | No  |
| rs7157399    | 14 | 70846954  | C  | T  | 0.860 | 0.0253853   | 1.81E-06 | 7.26E-28  | Yes | Yes |
| rs13379043   | 14 | 74250126  | C  | T  | 0.271 | -0.0165377  | 1.42E-06 | 7.92E-20  | Yes | No  |
| rs2058919    | 14 | 75310812  | C  | G  | 0.610 | -0.0099062  | 1.32E-06 | 3.37E-09  | Yes | Yes |
| rs35802157   | 14 | 90066634  | C  | T  | 0.627 | -0.00970292 | 1.31E-06 | 6.41E-09  | Yes | No  |
| rs17580      | 14 | 94847262  | A  | T  | 0.039 | 0.0498131   | 3.27E-06 | 1.05E-32  | Yes | Yes |
| rs2413926    | 15 | 49336477  | A  | T  | 0.375 | -0.013495   | 1.31E-06 | 7.63E-16  | Yes | Yes |
| rs62023490   | 15 | 53079024  | A  | G  | 0.105 | -0.0145004  | 2.03E-06 | 2.63E-08  | Yes | No  |
| rs79391862   | 15 | 53739426  | C  | A  | 0.020 | -0.0639367  | 4.82E-06 | 3.15E-25  | Yes | No  |
| rs72749499   | 15 | 57295579  | G  | A  | 0.070 | 0.0287142   | 2.51E-06 | 4.44E-19  | Yes | No  |
| rs35609148   | 15 | 58681533  | GT | G  | 0.614 | -0.026278   | 4.30E-06 | 2.68E-17  | No  | No  |
| rs11636087   | 15 | 63788267  | C  | T  | 0.298 | 0.0144221   | 1.40E-06 | 8.54E-16  | Yes | No  |
| rs12917376   | 15 | 75116167  | T  | C  | 0.577 | 0.0125937   | 1.29E-06 | 2.04E-14  | Yes | No  |
| rs34631529   | 15 | 101845482 | A  | G  | 0.005 | -0.0711347  | 9.85E-06 | 2.14E-09  | No  | No  |
| rs12445804   | 16 | 11706100  | A  | G  | 0.076 | 0.0325513   | 2.42E-06 | 8.48E-26  | Yes | Yes |
| rs35468353   | 16 | 31056433  | G  | A  | 0.377 | 0.0118798   | 1.29E-06 | 7.21E-13  | Yes | No  |
| rs247617     | 16 | 56990716  | A  | C  | 0.321 | -0.0366691  | 1.34E-06 | 1.66E-101 | Yes | No  |
| rs181501802  | 16 | 70067440  | A  | G  | 0.060 | 0.0238834   | 2.79E-06 | 2.35E-11  | Yes | No  |
| rs56212732   | 16 | 70930370  | T  | C  | 0.085 | -0.0266227  | 2.46E-06 | 2.19E-17  | No  | No  |
| rs34042070   | 16 | 72101525  | G  | C  | 0.191 | 0.0572597   | 1.59E-06 | 2.34E-173 | Yes | No  |
| rs7404072    | 16 | 73096750  | T  | C  | 0.714 | 0.0102936   | 1.41E-06 | 9.82E-09  | No  | No  |
| rs1121985    | 16 | 79363079  | C  | A  | 0.630 | 0.0107366   | 1.32E-06 | 2.06E-10  | Yes | Yes |
| rs67890964   | 16 | 83979317  | C  | T  | 0.381 | -0.0182605  | 1.35E-06 | 1.04E-26  | No  | No  |
| rs74035509   | 16 | 88567333  | T  | C  | 0.074 | 0.0232369   | 2.50E-06 | 2.89E-13  | Yes | No  |
| rs34460487   | 17 | 4685228   | A  | G  | 0.336 | 0.0146432   | 1.36E-06 | 2.74E-17  | No  | No  |
| rs571475342  | 17 | 5207882   | G  | A  | 0.005 | -0.0711954  | 9.44E-06 | 1.98E-09  | No  | No  |
| rs186021206  | 17 | 7069412   | A  | G  | 0.005 | -0.324203   | 9.77E-06 | 4.01E-151 | No  | No  |
| rs9894946    | 17 | 7571080   | G  | A  | 0.841 | -0.0165055  | 1.82E-06 | 6.62E-13  | Yes | No  |
| rs2270445    | 17 | 8219478   | G  | A  | 0.483 | 0.0141398   | 1.27E-06 | 3.23E-18  | Yes | Yes |
| rs28811342   | 17 | 18125845  | C  | T  | 0.197 | 0.0125833   | 1.58E-06 | 5.14E-10  | Yes | No  |
| rs704        | 17 | 26694861  | A  | G  | 0.477 | 0.018865    | 1.25E-06 | 8.12E-32  | Yes | Yes |
| rs56336338   | 17 | 27645258  | A  | G  | 0.134 | -0.0192092  | 1.86E-06 | 7.13E-16  | Yes | No  |
| rs111919672  | 17 | 28583498  | G  | C  | 0.073 | -0.0202781  | 2.69E-06 | 3.03E-09  | Yes | No  |
| rs12945088   | 17 | 29397852  | A  | G  | 0.693 | 0.0181711   | 1.46E-06 | 1.67E-22  | Yes | No  |
| rs640306     | 17 | 37067261  | C  | T  | 0.656 | -0.0100429  | 1.34E-06 | 4.19E-09  | Yes | No  |
| rs12943633   | 17 | 37970365  | T  | C  | 0.081 | -0.0177676  | 2.30E-06 | 1.84E-09  | Yes | Yes |
| rs2354155    | 17 | 40546652  | A  | G  | 0.527 | -0.0102054  | 1.37E-06 | 2.97E-09  | Yes | No  |
| rs72836561   | 17 | 41926126  | T  | C  | 0.030 | -0.0297626  | 3.65E-06 | 1.98E-10  | Yes | No  |
| rs12603290   | 17 | 45650196  | C  | T  | 0.505 | -0.0267572  | 1.30E-06 | 2.66E-58  | Yes | No  |
| rs2288278    | 17 | 46661292  | A  | G  | 0.650 | 0.0144015   | 1.32E-06 | 1.89E-17  | Yes | Yes |
| rs1292061    | 17 | 57911230  | G  | A  | 0.549 | 0.00994871  | 1.26E-06 | 8.02E-10  | Yes | No  |
| rs1801689    | 17 | 64210580  | C  | A  | 0.026 | 0.0908315   | 3.88E-06 | 8.37E-75  | Yes | No  |
| rs9332408    | 17 | 65108987  | C  | T  | 0.472 | 0.0123167   | 1.27E-06 | 2.73E-14  | Yes | Yes |
| rs78186330   | 17 | 66004715  | A  | G  | 0.208 | 0.0163391   | 1.61E-06 | 1.28E-15  | Yes | No  |
| rs77542162   | 17 | 67081278  | G  | A  | 0.020 | 0.18313     | 4.59E-06 | 9.74E-213 | Yes | No  |
| rs75910690   | 17 | 67668868  | T  | C  | 0.027 | 0.0534589   | 4.04E-06 | 5.46E-25  | Yes | No  |
| rs9890133    | 17 | 68169005  | G  | A  | 0.119 | 0.0156495   | 1.97E-06 | 6.17E-10  | Yes | No  |
| rs4485425    | 17 | 73767437  | G  | A  | 0.714 | 0.0177272   | 1.40E-06 | 4.26E-23  | Yes | Yes |
| rs11657987   | 17 | 76387363  | T  | G  | 0.498 | 0.0177879   | 1.27E-06 | 7.51E-28  | Yes | No  |
| rs12950377   | 17 | 81011652  | C  | T  | 0.151 | 0.0127952   | 1.76E-06 | 1.51E-08  | Yes | No  |
| rs150513143  | 18 | 3451539   | G  | GA | 0.084 | -0.0195269  | 2.97E-06 | 2.90E-08  | No  | No  |
| rs2840354    | 18 | 9545961   | T  | C  | 0.191 | 0.011566    | 1.60E-06 | 1.91E-08  | Yes | Yes |
| rs538969346  | 18 | 46545976  | C  | G  | 0.010 | 0.0553636   | 6.77E-06 | 1.02E-10  | No  | No  |
| rs77960347   | 18 | 47109955  | G  | A  | 0.013 | 0.0699399   | 5.59E-06 | 1.85E-22  | Yes | No  |
| rs12968116   | 18 | 55322502  | T  | C  | 0.126 | 0.0142034   | 1.89E-06 | 4.59E-09  | Yes | Yes |
| rs402348     | 18 | 61034420  | G  | T  | 0.205 | -0.0111643  | 1.58E-06 | 3.23E-08  | No  | No  |
| rs4807570    | 19 | 1123652   | A  | G  | 0.210 | -0.011545   | 1.55E-06 | 5.45E-09  | Yes | No  |
| rs1736177    | 19 | 2791624   | T  | C  | 0.307 | 0.015137    | 1.38E-06 | 1.49E-18  | Yes | No  |
| rs34054295   | 19 | 4478062   | G  | A  | 0.617 | -0.0117815  | 1.36E-06 | 4.51E-12  | Yes | No  |
| rs708686     | 19 | 5840619   | T  | C  | 0.278 | 0.0110129   | 1.41E-06 | 9.37E-10  | Yes | No  |
| rs571497     | 19 | 7827830   | A  | G  | 0.153 | -0.0145349  | 1.75E-06 | 1.10E-10  | Yes | Yes |
| rs1042540024 | 19 | 9901805   | A  | G  | 0.003 | -0.233452   | 7.24E-05 | 2.94E-11  | No  | No  |
| rs12720359   | 19 | 10464138  | G  | C  | 0.033 | -0.0573388  | 3.49E-06 | 1.25E-37  | Yes | No  |
| rs73015024   | 19 | 11197598  | T  | G  | 0.112 | -0.214907   | 1.97E-06 | 0         | Yes | No  |
| rs553321524  | 19 | 11723655  | C  | T  | 0.003 | -0.271418   | 5.06E-05 | 5.50E-13  | No  | No  |
| rs753931089  | 19 | 12295949  | G  | A  | 0.002 | -0.337892   | 4.14E-05 | 3.08E-20  | No  | No  |
| rs560788989  | 19 | 13250023  | C  | T  | 0.000 | 1.29738     | 0.000177 | 1.59E-14  | No  | No  |
| rs36014207   | 19 | 14172728  | T  | C  | 0.407 | -0.0108883  | 1.41E-06 | 5.36E-10  | Yes | No  |
| rs660247     | 19 | 15796507  | G  | A  | 0.531 | 0.0101861   | 1.27E-06 | 3.09E-10  | Yes | Yes |
| rs11668883   | 19 | 17527370  | A  | G  | 0.811 | -0.0132765  | 1.65E-06 | 2.66E-10  | Yes | No  |

|             |    |          |   |   |       |             |          |           |     |     |
|-------------|----|----------|---|---|-------|-------------|----------|-----------|-----|-----|
| rs4808766   | 19 | 18335715 | C | G | 0.258 | 0.0142898   | 1.43E-06 | 7.14E-15  | Yes | No  |
| rs58542926  | 19 | 19379549 | T | C | 0.075 | -0.110726   | 2.36E-06 | 2.89E-291 | Yes | No  |
| rs75916629  | 19 | 20213781 | G | A | 0.025 | -0.0580588  | 4.23E-06 | 6.06E-27  | Yes | No  |
| rs187551406 | 19 | 20737538 | T | C | 0.024 | -0.0372373  | 4.23E-06 | 6.11E-12  | Yes | No  |
| rs147791730 | 19 | 33864260 | A | G | 0.028 | -0.0290811  | 3.76E-06 | 1.76E-09  | Yes | No  |
| rs28659908  | 19 | 35693120 | C | T | 0.402 | -0.00997026 | 1.33E-06 | 3.83E-09  | Yes | No  |
| rs4803525   | 19 | 38319269 | G | A | 0.581 | -0.00926952 | 1.27E-06 | 1.43E-08  | Yes | No  |
| rs56113850  | 19 | 41353107 | C | T | 0.567 | 0.0142152   | 1.39E-06 | 1.85E-16  | No  | No  |
| rs768815028 | 19 | 41921372 | A | G | 0.001 | -0.457818   | 6.81E-05 | 2.68E-14  | No  | No  |
| rs562494568 | 19 | 42649075 | C | T | 0.001 | -0.497178   | 6.80E-05 | 2.82E-16  | No  | No  |
| rs538657595 | 19 | 43234281 | A | G | 0.001 | -0.506521   | 6.60E-05 | 1.84E-17  | No  | No  |
| rs76989105  | 19 | 44388711 | C | G | 0.013 | -0.0762932  | 5.86E-06 | 2.73E-24  | Yes | No  |
| rs62116778  | 19 | 44894070 | T | G | 0.035 | -0.116332   | 3.54E-06 | 1.65E-145 | Yes | No  |
| rs7412      | 19 | 45412079 | T | C | 0.075 | -0.515782   | 2.37E-06 | 0         | Yes | No  |
| rs540662190 | 19 | 45913250 | T | C | 0.017 | -0.174478   | 5.68E-06 | 7.62E-143 | No  | No  |
| rs150262789 | 19 | 46436564 | T | C | 0.017 | -0.0947987  | 4.99E-06 | 9.10E-50  | Yes | No  |
| rs574825898 | 19 | 47034252 | C | T | 0.001 | -0.238577   | 4.14E-05 | 1.56E-09  | No  | No  |
| rs681343    | 19 | 49206462 | T | C | 0.494 | 0.0292543   | 1.26E-06 | 1.24E-73  | Yes | No  |
| rs142385484 | 19 | 50016759 | T | C | 0.153 | -0.0186184  | 1.81E-06 | 1.16E-15  | Yes | No  |
| rs10406304  | 19 | 57010947 | G | T | 0.720 | -0.0124536  | 1.43E-06 | 8.15E-12  | Yes | No  |
| rs181976063 | 19 | 57969606 | T | C | 0.008 | 0.0595997   | 7.04E-06 | 3.73E-11  | No  | No  |
| rs35081008  | 19 | 58662235 | T | C | 0.155 | -0.0308607  | 1.74E-06 | 2.09E-43  | Yes | No  |
| rs73075609  | 20 | 5580789  | T | C | 0.024 | 0.0479201   | 4.29E-06 | 2.92E-18  | Yes | No  |
| rs438568    | 20 | 12958687 | G | A | 0.608 | 0.0135404   | 1.28E-06 | 1.85E-16  | Yes | No  |
| rs2618566   | 20 | 17844684 | T | G | 0.661 | -0.040212   | 1.39E-06 | 4.68E-117 | No  | No  |
| rs1044573   | 20 | 25206654 | G | A | 0.495 | 0.0102945   | 1.28E-06 | 2.93E-10  | Yes | No  |
| rs7261820   | 20 | 34160840 | A | G | 0.137 | -0.0304061  | 1.81E-06 | 4.90E-39  | Yes | No  |
| rs1883711   | 20 | 39179822 | C | G | 0.032 | 0.130754    | 3.77E-06 | 1.90E-161 | Yes | No  |
| rs6029549   | 20 | 39754695 | G | C | 0.474 | 0.0301702   | 1.25E-06 | 1.11E-78  | No  | No  |
| rs1800961   | 20 | 43042364 | T | C | 0.034 | -0.0549493  | 3.47E-06 | 5.93E-35  | Yes | No  |
| rs3843763   | 20 | 44548193 | T | C | 0.265 | -0.0120459  | 1.41E-06 | 2.99E-11  | Yes | No  |
| rs2295027   | 20 | 47582884 | A | G | 0.322 | 0.0115448   | 1.38E-06 | 5.72E-11  | Yes | No  |
| rs6022851   | 20 | 52536425 | T | C | 0.446 | 0.0115658   | 1.30E-06 | 2.14E-12  | Yes | Yes |
| rs3746778   | 20 | 61341472 | A | G | 0.402 | -0.0130201  | 1.50E-06 | 1.37E-12  | No  | No  |
| rs6090040   | 20 | 62692060 | C | A | 0.517 | -0.0143197  | 1.42E-06 | 4.26E-17  | Yes | No  |
| rs12106385  | 21 | 16586682 | A | T | 0.019 | -0.0364153  | 4.97E-06 | 1.13E-08  | Yes | No  |
| rs2833487   | 21 | 33087863 | G | A | 0.049 | 0.0314967   | 2.90E-06 | 2.40E-17  | Yes | Yes |
| rs1963676   | 21 | 40709960 | T | C | 0.576 | 0.0143783   | 1.29E-06 | 3.68E-18  | Yes | No  |
| rs5746498   | 22 | 18435794 | T | C | 0.762 | -0.0133001  | 1.54E-06 | 1.27E-11  | No  | No  |
| rs165722    | 22 | 19949013 | T | C | 0.529 | 0.00910311  | 1.27E-06 | 1.97E-08  | Yes | No  |
| rs5754102   | 22 | 21916272 | A | C | 0.190 | -0.0154113  | 1.98E-06 | 7.32E-11  | No  | No  |
| rs5752963   | 22 | 30203833 | A | G | 0.036 | 0.0267521   | 3.30E-06 | 2.53E-10  | Yes | No  |
| rs5755688   | 22 | 35685048 | G | A | 0.641 | -0.0136768  | 1.32E-06 | 4.99E-16  | Yes | No  |
| rs132646    | 22 | 36550067 | C | T | 0.834 | -0.0133892  | 1.68E-06 | 5.51E-10  | Yes | Yes |
| rs760719    | 22 | 37460449 | T | C | 0.428 | 0.00966108  | 1.29E-06 | 4.32E-09  | Yes | No  |
| rs138352    | 22 | 41268925 | G | T | 0.654 | -0.0137988  | 1.33E-06 | 6.84E-16  | Yes | Yes |
| rs3747207   | 22 | 44324855 | A | G | 0.222 | -0.0139089  | 1.50E-06 | 5.51E-13  | Yes | No  |
| rs13268     | 22 | 45996298 | G | A | 0.024 | -0.0379802  | 4.09E-06 | 4.07E-13  | Yes | Yes |
| rs146471363 | 22 | 46730338 | G | C | 0.005 | 0.0814738   | 1.05E-05 | 4.80E-10  | No  | No  |
| rs9616822   | 22 | 50840573 | A | G | 0.359 | 0.0113696   | 1.31E-06 | 1.12E-11  | Yes | No  |

47 **Supplemental Table 5.** SNPs included in HDL cholesterol-related analyses.

48

| RSID        | Chrom. | Position  | Effect allele | Other allele | Effect allele freq. | Beta       | SE       | p-value   | Used in MR | Used in MR + Steiger filt. |
|-------------|--------|-----------|---------------|--------------|---------------------|------------|----------|-----------|------------|----------------------------|
| rs13303368  | 1      | 914852    | C             | G            | 0.591               | -0.0110648 | 1.44E-06 | 3.07E-08  | Yes        | No                         |
| rs10753556  | 1      | 23732762  | G             | A            | 0.874               | 0.019612   | 1.87E-06 | 5.69E-13  | Yes        | No                         |
| rs75460349  | 1      | 27180088  | C             | A            | 0.024               | -0.0872946 | 4.03E-06 | 7.54E-50  | Yes        | No                         |
| rs41309280  | 1      | 27688814  | T             | C            | 0.037               | -0.0301971 | 3.40E-06 | 1.06E-09  | Yes        | No                         |
| rs546355    | 1      | 28364156  | C             | T            | 0.312               | -0.0127904 | 1.34E-06 | 5.33E-11  | Yes        | Yes                        |
| rs4660446   | 1      | 39438889  | C             | T            | 0.656               | -0.0123102 | 1.37E-06 | 4.26E-10  | Yes        | No                         |
| rs3768321   | 1      | 40035928  | T             | G            | 0.193               | -0.0443841 | 1.59E-06 | 1.98E-81  | Yes        | No                         |
| rs12140153  | 1      | 62579891  | T             | G            | 0.091               | 0.019101   | 2.22E-06 | 3.75E-09  | Yes        | No                         |
| rs1168124   | 1      | 63139730  | T             | C            | 0.663               | 0.0122399  | 1.34E-06 | 2.80E-10  | Yes        | No                         |
| rs6663226   | 1      | 66164748  | A             | T            | 0.640               | -0.010488  | 1.29E-06 | 2.57E-08  | No         | No                         |
| rs650194    | 1      | 71414863  | G             | A            | 0.662               | 0.0114281  | 1.32E-06 | 3.01E-09  | Yes        | No                         |
| rs2613496   | 1      | 72754788  | C             | T            | 0.816               | -0.0141294 | 1.61E-06 | 1.82E-09  | Yes        | No                         |
| rs4847419   | 1      | 93845655  | A             | T            | 0.638               | -0.0258976 | 1.31E-06 | 1.78E-42  | Yes        | No                         |
| rs646776    | 1      | 109818530 | T             | C            | 0.780               | -0.0346789 | 1.48E-06 | 5.92E-58  | Yes        | No                         |
| rs333947    | 1      | 110470764 | A             | G            | 0.150               | -0.0267442 | 1.77E-06 | 3.93E-25  | Yes        | Yes                        |
| rs181473381 | 1      | 145472741 | A             | C            | 0.004               | 0.140501   | 1.20E-05 | 2.62E-16  | No         | No                         |
| rs72692849  | 1      | 149995966 | T             | C            | 0.089               | 0.0245208  | 2.19E-06 | 1.52E-14  | Yes        | No                         |
| rs267738    | 1      | 150940625 | G             | T            | 0.213               | 0.0223838  | 1.51E-06 | 3.77E-24  | Yes        | No                         |
| rs3806415   | 1      | 156698265 | T             | C            | 0.325               | 0.011271   | 1.32E-06 | 4.71E-09  | Yes        | No                         |
| rs9425299   | 1      | 172359100 | T             | C            | 0.570               | 0.0117647  | 1.26E-06 | 1.19E-10  | Yes        | No                         |
| rs10913570  | 1      | 178523126 | C             | A            | 0.519               | -0.0181662 | 1.24E-06 | 9.01E-24  | Yes        | Yes                        |
| rs1689797   | 1      | 182150978 | A             | C            | 0.326               | -0.0260934 | 1.32E-06 | 8.78E-42  | Yes        | Yes                        |
| rs13303359  | 1      | 203518873 | C             | A            | 0.522               | 0.0118279  | 1.41E-06 | 2.27E-09  | Yes        | No                         |
| rs3862948   | 1      | 205099959 | A             | C            | 0.234               | -0.012452  | 1.46E-06 | 5.78E-09  | Yes        | No                         |
| rs3747973   | 1      | 205677148 | G             | A            | 0.588               | 0.0156362  | 1.28E-06 | 3.51E-17  | Yes        | No                         |
| rs59770119  | 1      | 219664627 | A             | G            | 0.577               | -0.0168521 | 1.27E-06 | 6.83E-20  | Yes        | No                         |
| rs2642438   | 1      | 220970028 | G             | A            | 0.706               | 0.0271768  | 1.37E-06 | 1.07E-42  | Yes        | No                         |
| rs56105022  | 1      | 224544746 | A             | G            | 0.035               | -0.030072  | 3.53E-06 | 5.21E-09  | Yes        | No                         |
| rs10127775  | 1      | 230295789 | T             | A            | 0.600               | 0.0511741  | 1.26E-06 | 1.20E-170 | Yes        | No                         |
| rs553427    | 1      | 234852760 | T             | C            | 0.527               | 0.0171565  | 1.25E-06 | 6.46E-21  | Yes        | No                         |
| rs17713729  | 2      | 249092    | C             | A            | 0.352               | 0.0157694  | 1.29E-06 | 6.61E-17  | Yes        | Yes                        |
| rs6542680   | 2      | 3640142   | T             | C            | 0.808               | -0.0226427 | 1.61E-06 | 1.67E-22  | Yes        | No                         |
| rs1107850   | 2      | 20371772  | A             | G            | 0.485               | -0.0132386 | 1.24E-06 | 2.39E-13  | Yes        | No                         |
| rs676210    | 2      | 21231524  | A             | G            | 0.214               | 0.0604574  | 1.50E-06 | 4.90E-168 | Yes        | No                         |
| rs13389106  | 2      | 30480750  | G             | T            | 0.195               | -0.0123905 | 1.56E-06 | 4.90E-08  | Yes        | No                         |
| rs17326656  | 2      | 48962291  | T             | G            | 0.231               | -0.0162522 | 1.47E-06 | 4.25E-14  | Yes        | No                         |
| rs805317    | 2      | 54135004  | A             | T            | 0.449               | 0.010611   | 1.25E-06 | 5.75E-09  | No         | No                         |
| rs17049712  | 2      | 58961136  | T             | C            | 0.295               | -0.0120282 | 1.36E-06 | 1.37E-09  | Yes        | No                         |
| rs2540949   | 2      | 65284231  | T             | A            | 0.383               | 0.0164761  | 1.27E-06 | 8.04E-19  | Yes        | No                         |
| rs11883967  | 2      | 66673862  | C             | A            | 0.662               | 0.0107699  | 1.32E-06 | 2.15E-08  | No         | No                         |
| rs7586605   | 2      | 85561141  | T             | C            | 0.730               | 0.0121958  | 1.40E-06 | 2.56E-09  | Yes        | No                         |
| rs4851250   | 2      | 100729293 | C             | T            | 0.172               | 0.0147729  | 1.64E-06 | 6.25E-10  | Yes        | No                         |
| rs11688682  | 2      | 121347612 | C             | G            | 0.257               | 0.0177778  | 1.71E-06 | 5.06E-14  | No         | No                         |
| rs6758044   | 2      | 135592245 | C             | T            | 0.387               | 0.0109946  | 1.35E-06 | 1.89E-08  | Yes        | No                         |
| rs3739020   | 2      | 136602491 | G             | T            | 0.216               | 0.01843    | 1.60E-06 | 5.94E-16  | Yes        | No                         |
| rs13389219  | 2      | 165528876 | T             | C            | 0.400               | 0.0290173  | 1.26E-06 | 4.10E-56  | Yes        | No                         |
| rs1866631   | 2      | 174075761 | A             | G            | 0.584               | -0.0106601 | 1.26E-06 | 6.77E-09  | Yes        | No                         |
| rs7581601   | 2      | 203497786 | C             | A            | 0.315               | -0.0175099 | 1.34E-06 | 2.64E-19  | Yes        | No                         |
| rs1047891   | 2      | 211540507 | A             | C            | 0.308               | -0.0164194 | 1.36E-06 | 8.45E-17  | Yes        | No                         |
| rs78058190  | 2      | 219699999 | A             | G            | 0.052               | -0.0808669 | 3.25E-06 | 6.52E-67  | No         | No                         |
| rs2943645   | 2      | 227099180 | T             | C            | 0.636               | -0.0372461 | 1.28E-06 | 4.88E-88  | Yes        | No                         |
| rs11694828  | 2      | 228565656 | A             | G            | 0.451               | 0.0145721  | 1.31E-06 | 1.17E-14  | Yes        | No                         |
| rs4675812   | 2      | 242395674 | A             | G            | 0.590               | 0.0133286  | 1.26E-06 | 4.17E-13  | Yes        | Yes                        |
| rs12485478  | 3      | 12351223  | G             | A            | 0.027               | -0.0536649 | 3.78E-06 | 2.12E-22  | Yes        | No                         |
| rs2455850   | 3      | 15782711  | C             | A            | 0.684               | 0.0136177  | 1.38E-06 | 6.42E-12  | Yes        | No                         |
| rs2044754   | 3      | 24292940  | G             | A            | 0.109               | -0.0169416 | 1.98E-06 | 4.55E-09  | Yes        | No                         |
| rs11706926  | 3      | 36978647  | G             | A            | 0.552               | 0.0126115  | 1.25E-06 | 4.24E-12  | Yes        | No                         |
| rs2290547   | 3      | 47061183  | A             | G            | 0.172               | -0.0201189 | 1.68E-06 | 9.61E-17  | Yes        | No                         |
| rs7634917   | 3      | 50049299  | G             | T            | 0.478               | 0.0219633  | 1.28E-06 | 1.32E-32  | Yes        | No                         |
| rs138789058 | 3      | 52124388  | T             | C            | 0.018               | -0.0399666 | 4.74E-06 | 7.05E-09  | Yes        | No                         |
| rs2240921   | 3      | 52830764  | T             | C            | 0.116               | 0.0262069  | 1.93E-06 | 1.41E-20  | Yes        | No                         |
| rs13066793  | 3      | 87037543  | G             | A            | 0.091               | 0.0180945  | 2.21E-06 | 1.75E-08  | No         | No                         |
| rs4516580   | 3      | 114509447 | C             | T            | 0.833               | -0.0148484 | 1.73E-06 | 2.31E-09  | Yes        | No                         |
| rs3732356   | 3      | 119529113 | T             | G            | 0.932               | -0.0300666 | 2.49E-06 | 1.37E-16  | Yes        | No                         |

|             |   |           |   |         |       |            |          |           |     |     |
|-------------|---|-----------|---|---------|-------|------------|----------|-----------|-----|-----|
| rs11708067  | 3 | 123065778 | G | A       | 0.227 | -0.0129598 | 1.47E-06 | 1.45E-09  | Yes | No  |
| rs2811468   | 3 | 129296847 | G | A       | 0.195 | 0.0144412  | 1.56E-06 | 2.55E-10  | Yes | No  |
| rs1154988   | 3 | 135925191 | A | T       | 0.780 | -0.0260492 | 1.50E-06 | 1.76E-32  | Yes | No  |
| rs62271373  | 3 | 150066540 | A | T       | 0.053 | -0.0370833 | 2.81E-06 | 1.64E-19  | Yes | No  |
| rs13082076  | 3 | 152085277 | C | T       | 0.296 | 0.0122004  | 1.35E-06 | 6.66E-10  | Yes | No  |
| rs10049088  | 3 | 156797648 | T | C       | 0.384 | 0.0211283  | 1.28E-06 | 5.35E-30  | Yes | No  |
| rs1516725   | 3 | 185824004 | C | T       | 0.866 | 0.0300388  | 1.83E-06 | 2.63E-29  | Yes | No  |
| rs1051613   | 4 | 951179    | A | G       | 0.538 | 0.0133651  | 1.26E-06 | 3.78E-13  | Yes | No  |
| rs4450871   | 4 | 4990298   | G | A       | 0.437 | 0.0114259  | 1.40E-06 | 8.83E-09  | No  | No  |
| rs7694606   | 4 | 18028987  | A | G       | 0.149 | -0.0141157 | 1.73E-06 | 2.13E-08  | Yes | No  |
| rs73243877  | 4 | 26047616  | G | A       | 0.163 | -0.0214443 | 1.66E-06 | 8.91E-19  | Yes | No  |
| rs150361490 | 4 | 55530748  | A | ATTA... | 0.467 | 0.0121747  | 1.54E-06 | 3.64E-09  | No  | No  |
| rs35662434  | 4 | 69339933  | G | A       | 0.221 | 0.0151227  | 1.59E-06 | 2.58E-11  | Yes | No  |
| rs573930512 | 4 | 74512280  | A | G       | 0.002 | 0.157789   | 2.50E-05 | 6.62E-09  | No  | No  |
| rs6831339   | 4 | 83906408  | T | C       | 0.248 | -0.0120156 | 1.44E-06 | 9.08E-09  | Yes | No  |
| rs342469    | 4 | 88050554  | A | G       | 0.602 | -0.0152462 | 1.27E-06 | 1.56E-16  | Yes | No  |
| rs2167750   | 4 | 89730074  | T | C       | 0.464 | -0.0190136 | 1.24E-06 | 5.54E-26  | Yes | No  |
| rs547953616 | 4 | 100020668 | T | C       | 0.003 | 0.168679   | 1.37E-05 | 6.27E-18  | No  | No  |
| rs951941    | 4 | 100541411 | A | G       | 0.035 | 0.0294019  | 3.37E-06 | 2.26E-09  | Yes | No  |
| rs12511373  | 4 | 102666785 | T | C       | 0.098 | -0.0227101 | 2.22E-06 | 9.89E-13  | No  | No  |
| rs13107325  | 4 | 103188709 | T | C       | 0.064 | -0.0827466 | 2.48E-06 | 3.39E-115 | Yes | No  |
| rs74332078  | 4 | 103766720 | A | G       | 0.032 | -0.0352122 | 3.57E-06 | 1.31E-11  | Yes | No  |
| rs9884482   | 4 | 106081636 | C | T       | 0.378 | -0.0117657 | 1.27E-06 | 2.15E-10  | Yes | No  |
| rs138307849 | 4 | 110095620 | C | T       | 0.006 | -0.116992  | 8.58E-06 | 1.28E-21  | No  | No  |
| rs114816312 | 4 | 110638824 | T | C       | 0.006 | -0.125672  | 8.40E-06 | 1.03E-25  | No  | No  |
| rs62328321  | 4 | 143319721 | T | C       | 0.629 | 0.0105435  | 1.28E-06 | 1.55E-08  | Yes | No  |
| rs72729623  | 4 | 154208278 | T | C       | 0.145 | -0.0163973 | 1.75E-06 | 1.50E-10  | Yes | No  |
| rs1425485   | 4 | 157681890 | T | C       | 0.228 | 0.0185608  | 1.47E-06 | 5.53E-18  | Yes | No  |
| rs76086106  | 5 | 39491186  | A | G       | 0.042 | 0.0274271  | 3.17E-06 | 2.78E-09  | Yes | No  |
| rs6866562   | 5 | 52697383  | A | G       | 0.539 | -0.0107433 | 1.24E-06 | 3.18E-09  | Yes | No  |
| rs1664781   | 5 | 53276301  | A | G       | 0.688 | -0.0144373 | 1.33E-06 | 1.01E-13  | Yes | No  |
| rs28650790  | 5 | 55861464  | T | C       | 0.180 | -0.0302227 | 1.60E-06 | 1.85E-38  | Yes | No  |
| rs4976033   | 5 | 67714246  | G | A       | 0.405 | -0.0135062 | 1.30E-06 | 5.18E-13  | Yes | No  |
| rs970305    | 5 | 72942296  | G | A       | 0.716 | 0.0128703  | 1.39E-06 | 2.02E-10  | Yes | No  |
| rs2307111   | 5 | 75003678  | C | T       | 0.394 | 0.0161161  | 1.26E-06 | 2.68E-18  | Yes | No  |
| rs9293683   | 5 | 75700310  | T | C       | 0.661 | 0.0108197  | 1.34E-06 | 2.94E-08  | Yes | Yes |
| rs115912456 | 5 | 82815158  | G | A       | 0.042 | 0.0287502  | 3.07E-06 | 1.43E-10  | Yes | No  |
| rs12234017  | 5 | 118711834 | G | A       | 0.257 | 0.0163739  | 1.42E-06 | 2.68E-15  | Yes | No  |
| rs35897671  | 5 | 127349745 | T | C       | 0.335 | 0.0110772  | 1.32E-06 | 9.95E-09  | Yes | No  |
| rs10479001  | 5 | 131607721 | T | C       | 0.042 | 0.0243148  | 3.06E-06 | 4.85E-08  | Yes | No  |
| rs72801474  | 5 | 132444128 | A | G       | 0.096 | 0.0257732  | 2.15E-06 | 2.60E-16  | Yes | No  |
| rs254559    | 5 | 134444982 | A | C       | 0.408 | -0.0109635 | 1.25E-06 | 2.07E-09  | Yes | No  |
| rs12523418  | 5 | 141707225 | G | A       | 0.320 | 0.0117155  | 1.35E-06 | 2.39E-09  | Yes | No  |
| rs1438588   | 5 | 153444950 | G | A       | 0.633 | -0.0117196 | 1.29E-06 | 4.43E-10  | Yes | No  |
| rs1650527   | 5 | 158022724 | T | C       | 0.228 | -0.0206524 | 1.47E-06 | 8.06E-22  | Yes | No  |
| rs1473247   | 5 | 158603571 | C | T       | 0.254 | 0.0116636  | 1.41E-06 | 1.36E-08  | Yes | Yes |
| rs72812818  | 5 | 173356752 | C | G       | 0.311 | -0.0110461 | 1.33E-06 | 1.28E-08  | Yes | No  |
| rs6882591   | 5 | 176546460 | A | G       | 0.147 | 0.0165661  | 1.76E-06 | 1.21E-10  | Yes | No  |
| rs138692142 | 5 | 180349778 | T | C       | 0.009 | -0.0717938 | 7.24E-06 | 5.14E-12  | No  | No  |
| rs1240811   | 6 | 16818805  | T | C       | 0.309 | 0.011396   | 1.33E-06 | 4.64E-09  | Yes | No  |
| rs806794    | 6 | 26200677  | G | A       | 0.289 | 0.0110885  | 1.37E-06 | 2.80E-08  | Yes | No  |
| rs9368561   | 6 | 28168343  | T | C       | 0.132 | -0.0163993 | 1.89E-06 | 2.63E-09  | Yes | No  |
| rs1611282   | 6 | 29730002  | T | G       | 0.580 | 0.0105981  | 1.31E-06 | 2.84E-08  | Yes | No  |
| rs1264377   | 6 | 30764907  | A | G       | 0.155 | -0.015369  | 1.93E-06 | 1.22E-08  | Yes | No  |
| rs76716928  | 6 | 31295941  | G | C       | 0.367 | -0.0201802 | 1.39E-06 | 1.96E-23  | No  | No  |
| rs115003989 | 6 | 31925921  | A | G       | 0.023 | -0.0424634 | 4.58E-06 | 5.47E-11  | Yes | No  |
| rs17209803  | 6 | 32443061  | A | C       | 0.047 | -0.0371845 | 3.27E-06 | 4.76E-16  | Yes | No  |
| rs115675705 | 6 | 34094919  | G | A       | 0.031 | -0.0410057 | 3.74E-06 | 4.89E-14  | Yes | No  |
| rs2263329   | 6 | 34595543  | C | T       | 0.358 | -0.0292735 | 1.32E-06 | 1.62E-52  | Yes | No  |
| rs11754612  | 6 | 35476562  | A | T       | 0.115 | -0.0173013 | 1.98E-06 | 2.05E-09  | Yes | No  |
| rs142449754 | 6 | 41986427  | T | C       | 0.249 | -0.018916  | 1.42E-06 | 6.84E-20  | Yes | No  |
| rs9296406   | 6 | 42940810  | C | T       | 0.539 | 0.0166988  | 1.24E-06 | 2.08E-20  | Yes | No  |
| rs998584    | 6 | 43757896  | A | C       | 0.478 | -0.0305272 | 1.31E-06 | 3.48E-60  | Yes | No  |
| rs2608629   | 6 | 52625794  | A | G       | 0.648 | 0.0131163  | 1.30E-06 | 3.74E-12  | Yes | No  |
| rs71721600  | 6 | 98584717  | T | TA      | 0.479 | 0.0115191  | 1.67E-06 | 3.32E-08  | No  | No  |
| rs565216100 | 6 | 109064220 | T | C       | 0.157 | 0.0175023  | 2.28E-06 | 7.83E-09  | No  | No  |
| rs11759230  | 6 | 109640321 | C | A       | 0.342 | -0.0173729 | 1.30E-06 | 6.56E-20  | Yes | No  |
| rs1338668   | 6 | 116394809 | A | G       | 0.412 | 0.015197   | 1.26E-06 | 1.33E-16  | Yes | No  |
| rs72959041  | 6 | 127454893 | A | G       | 0.052 | -0.046877  | 2.84E-06 | 8.90E-30  | Yes | No  |
| rs2245133   | 6 | 131931092 | C | T       | 0.167 | -0.0144025 | 1.67E-06 | 3.78E-09  | Yes | No  |
| rs9399136   | 6 | 135402339 | C | T       | 0.260 | -0.012162  | 1.45E-06 | 5.96E-09  | Yes | No  |
| rs6924387   | 6 | 137082948 | G | A       | 0.414 | -0.0129052 | 1.29E-06 | 5.72E-12  | Yes | No  |

|             |    |           |    |         |       |            |          |           |     |     |
|-------------|----|-----------|----|---------|-------|------------|----------|-----------|-----|-----|
| rs2750415   | 6  | 139261477 | A  | G       | 0.825 | -0.0156339 | 1.65E-06 | 6.62E-11  | Yes | No  |
| rs17585887  | 6  | 139835498 | C  | T       | 0.582 | 0.0210868  | 1.25E-06 | 5.29E-31  | Yes | No  |
| rs672341    | 6  | 153455994 | A  | G       | 0.410 | 0.0139449  | 1.26E-06 | 3.85E-14  | Yes | No  |
| rs78425119  | 6  | 160501825 | A  | G       | 0.066 | -0.0257746 | 2.47E-06 | 9.41E-13  | Yes | No  |
| rs41272086  | 6  | 161008646 | A  | G       | 0.101 | -0.0576994 | 2.05E-06 | 7.66E-83  | Yes | No  |
| rs147829643 | 6  | 161588372 | T  | C       | 0.037 | -0.0300993 | 3.40E-06 | 1.26E-09  | Yes | No  |
| rs9347737   | 6  | 163740322 | G  | A       | 0.423 | -0.0115335 | 1.30E-06 | 9.93E-10  | Yes | No  |
| rs34409228  | 7  | 1102674   | T  | C       | 0.126 | 0.0282762  | 1.90E-06 | 1.00E-24  | Yes | No  |
| rs144787122 | 7  | 2296552   | G  | A       | 0.004 | 0.0889132  | 1.21E-05 | 3.08E-08  | No  | No  |
| rs79949326  | 7  | 6461310   | T  | C       | 0.252 | 0.0282304  | 1.44E-06 | 2.05E-41  | Yes | No  |
| rs1990622   | 7  | 12283787  | G  | A       | 0.411 | -0.0124601 | 1.27E-06 | 1.57E-11  | Yes | Yes |
| rs6968554   | 7  | 17287106  | G  | A       | 0.635 | -0.0125768 | 1.29E-06 | 2.11E-11  | Yes | No  |
| rs10242866  | 7  | 17920613  | T  | C       | 0.393 | -0.02315   | 1.27E-06 | 1.04E-35  | Yes | Yes |
| rs1534696   | 7  | 26397239  | A  | C       | 0.552 | 0.0158296  | 1.28E-06 | 1.61E-17  | Yes | No  |
| rs12533197  | 7  | 36192606  | G  | T       | 0.443 | -0.0154886 | 1.26E-06 | 3.13E-17  | Yes | No  |
| rs138994411 | 7  | 38265179  | C  | CTTG... | 0.469 | 0.0136679  | 1.48E-06 | 8.79E-12  | No  | No  |
| rs876039    | 7  | 50308811  | C  | G       | 0.313 | 0.0153154  | 1.33E-06 | 2.69E-15  | Yes | Yes |
| rs55747707  | 7  | 73037366  | A  | G       | 0.196 | 0.0381472  | 1.57E-06 | 1.52E-62  | Yes | No  |
| rs117649635 | 7  | 74297908  | G  | C       | 0.054 | -0.023684  | 2.96E-06 | 2.87E-08  | Yes | No  |
| rs1761661   | 7  | 80238041  | C  | A       | 0.455 | 0.0107802  | 1.25E-06 | 2.98E-09  | Yes | No  |
| rs705379    | 7  | 94953895  | A  | G       | 0.464 | -0.0102792 | 1.27E-06 | 2.55E-08  | Yes | No  |
| rs4730222   | 7  | 106810293 | C  | G       | 0.200 | 0.0142388  | 1.56E-06 | 3.89E-10  | Yes | No  |
| rs10229792  | 7  | 116982907 | A  | G       | 0.362 | -0.0118447 | 1.31E-06 | 5.21E-10  | Yes | No  |
| rs11762784  | 7  | 130424646 | A  | G       | 0.495 | 0.0299962  | 1.27E-06 | 1.33E-59  | Yes | No  |
| rs10273527  | 7  | 139036598 | T  | G       | 0.234 | 0.0118801  | 1.48E-06 | 3.36E-08  | Yes | No  |
| rs7794796   | 7  | 150540196 | T  | C       | 0.332 | -0.0174129 | 1.32E-06 | 1.61E-19  | Yes | No  |
| rs11783088  | 8  | 6620392   | G  | A       | 0.250 | -0.0120541 | 1.46E-06 | 1.39E-08  | Yes | No  |
| rs9987289   | 8  | 9183358   | G  | A       | 0.908 | 0.0933621  | 2.13E-06 | 2.87E-198 | Yes | No  |
| rs4645567   | 8  | 9723964   | A  | T       | 0.786 | -0.0145358 | 1.53E-06 | 7.49E-11  | Yes | No  |
| rs9657541   | 8  | 10643164  | T  | C       | 0.202 | -0.0183142 | 1.55E-06 | 5.26E-16  | Yes | No  |
| rs113920320 | 8  | 19292422  | A  | C       | 0.001 | -0.225248  | 2.53E-05 | 1.58E-12  | No  | No  |
| rs15285     | 8  | 19824667  | T  | C       | 0.287 | 0.107166   | 1.36E-06 | 0         | Yes | Yes |
| rs73221948  | 8  | 25464670  | T  | G       | 0.277 | -0.0137693 | 1.74E-06 | 7.93E-09  | No  | No  |
| rs75772194  | 8  | 36846435  | G  | A       | 0.166 | -0.0131949 | 1.65E-06 | 4.44E-08  | Yes | No  |
| rs6994609   | 8  | 64799004  | G  | T       | 0.474 | 0.0111147  | 1.24E-06 | 7.69E-10  | Yes | No  |
| rs34246353  | 8  | 71138299  | C  | T       | 0.093 | -0.0249181 | 2.11E-06 | 6.10E-16  | Yes | No  |
| rs28471687  | 8  | 72459582  | G  | A       | 0.073 | -0.0216641 | 2.37E-06 | 3.97E-10  | Yes | No  |
| rs35910594  | 8  | 103924469 | AT | A       | 0.162 | 0.0165165  | 2.16E-06 | 1.04E-08  | No  | No  |
| rs2941657   | 8  | 106372180 | G  | A       | 0.531 | -0.0105831 | 1.25E-06 | 7.08E-09  | Yes | No  |
| rs3808460   | 8  | 116597635 | C  | T       | 0.574 | 0.0325051  | 1.25E-06 | 5.44E-71  | Yes | Yes |
| rs10955991  | 8  | 121867780 | C  | T       | 0.669 | -0.0196898 | 1.33E-06 | 2.84E-24  | Yes | Yes |
| rs2954038   | 8  | 126507389 | A  | C       | 0.697 | 0.0425786  | 1.35E-06 | 1.44E-103 | Yes | No  |
| rs7817574   | 8  | 144302570 | C  | T       | 0.195 | 0.0275212  | 1.59E-06 | 6.78E-33  | Yes | No  |
| rs4741016   | 9  | 1036132   | C  | T       | 0.230 | -0.0144567 | 1.48E-06 | 1.92E-11  | Yes | No  |
| rs77375493  | 9  | 5073770   | T  | G       | 0.000 | -0.344082  | 5.32E-05 | 4.54E-08  | No  | No  |
| rs543458    | 9  | 14068327  | C  | A       | 0.190 | 0.0128359  | 1.58E-06 | 2.50E-08  | Yes | No  |
| rs686030    | 9  | 15304782  | A  | C       | 0.858 | 0.0496185  | 1.77E-06 | 1.50E-82  | Yes | Yes |
| rs62543565  | 9  | 16901067  | A  | C       | 0.637 | 0.0105497  | 1.30E-06 | 2.06E-08  | Yes | No  |
| rs1412234   | 9  | 28410683  | C  | T       | 0.320 | -0.0125588 | 1.33E-06 | 9.96E-11  | Yes | No  |
| rs11795343  | 9  | 32523737  | C  | T       | 0.404 | 0.0101314  | 1.27E-06 | 4.18E-08  | Yes | Yes |
| rs746125435 | 9  | 105805994 | G  | T       | 0.000 | -0.410586  | 7.01E-05 | 4.71E-09  | No  | No  |
| rs549466628 | 9  | 106532723 | T  | TA      | 0.006 | 0.0752904  | 9.97E-06 | 2.67E-08  | No  | No  |
| rs186793936 | 9  | 107093784 | T  | G       | 0.002 | -0.33492   | 1.85E-05 | 3.20E-38  | No  | No  |
| rs2740488   | 9  | 107661742 | C  | A       | 0.261 | -0.0689666 | 1.41E-06 | 2.18E-246 | Yes | No  |
| rs577703186 | 9  | 108359753 | G  | A       | 0.001 | -0.27686   | 3.19E-05 | 2.32E-13  | No  | No  |
| rs535372564 | 9  | 109062494 | A  | C       | 0.001 | -0.277012  | 3.74E-05 | 4.13E-10  | No  | No  |
| rs10733608  | 9  | 117148430 | T  | G       | 0.476 | 0.0119209  | 1.25E-06 | 6.03E-11  | Yes | No  |
| rs4620350   | 9  | 126539944 | G  | A       | 0.065 | -0.0202953 | 2.48E-06 | 2.01E-08  | Yes | No  |
| rs2519093   | 9  | 136141870 | T  | C       | 0.187 | 0.0169995  | 1.56E-06 | 9.30E-14  | Yes | No  |
| rs75406471  | 10 | 5257647   | A  | G       | 0.156 | -0.0141584 | 1.71E-06 | 1.52E-08  | Yes | No  |
| rs11254464  | 10 | 17265447  | C  | T       | 0.421 | 0.0140662  | 1.29E-06 | 3.81E-14  | Yes | No  |
| rs12358424  | 10 | 33641149  | G  | T       | 0.090 | -0.0256025 | 2.19E-06 | 1.30E-15  | Yes | No  |
| rs55665473  | 10 | 46022005  | A  | G       | 0.239 | 0.0262865  | 1.44E-06 | 1.09E-35  | Yes | No  |
| rs10826337  | 10 | 61409469  | A  | G       | 0.417 | -0.0117207 | 1.27E-06 | 2.35E-10  | Yes | No  |
| rs7924036   | 10 | 65191645  | T  | G       | 0.513 | 0.0113101  | 1.26E-06 | 6.66E-10  | Yes | No  |
| rs703966    | 10 | 80954251  | A  | G       | 0.418 | 0.01183    | 1.26E-06 | 1.14E-10  | Yes | Yes |
| rs17875327  | 10 | 94274809  | G  | A       | 0.110 | -0.0179101 | 2.02E-06 | 1.15E-09  | Yes | No  |
| rs4418728   | 10 | 94839724  | T  | G       | 0.451 | 0.0194771  | 1.25E-06 | 7.98E-27  | Yes | No  |
| rs7091593   | 10 | 95342772  | T  | A       | 0.113 | -0.0206023 | 1.96E-06 | 6.55E-13  | Yes | No  |
| rs2862954   | 10 | 101912064 | C  | T       | 0.482 | 0.0145913  | 1.23E-06 | 5.65E-16  | Yes | No  |
| rs2792751   | 10 | 113940329 | C  | T       | 0.719 | -0.0306446 | 1.36E-06 | 1.40E-53  | Yes | No  |
| rs72823014  | 10 | 115786236 | A  | G       | 0.118 | 0.0309908  | 1.92E-06 | 1.91E-28  | Yes | No  |

|             |    |           |   |       |       |            |          |           |     |     |
|-------------|----|-----------|---|-------|-------|------------|----------|-----------|-----|-----|
| rs11197783  | 10 | 118407116 | A | T     | 0.574 | -0.0120878 | 1.26E-06 | 4.40E-11  | No  | No  |
| rs12415055  | 10 | 122869552 | G | A     | 0.112 | -0.018222  | 1.94E-06 | 1.22E-10  | Yes | No  |
| rs10901854  | 10 | 126733643 | C | T     | 0.271 | -0.0112228 | 1.40E-06 | 4.15E-08  | Yes | No  |
| rs140201358 | 11 | 823586    | G | C     | 0.013 | -0.0586188 | 5.54E-06 | 2.81E-13  | Yes | No  |
| rs1661052   | 11 | 2942593   | A | G     | 0.908 | 0.0260638  | 2.22E-06 | 5.40E-16  | Yes | No  |
| rs2218793   | 11 | 10380828  | A | C     | 0.286 | -0.0130127 | 1.36E-06 | 6.29E-11  | Yes | No  |
| rs150090666 | 11 | 14865399  | T | C     | 0.001 | 0.345269   | 2.53E-05 | 1.12E-25  | No  | No  |
| rs7944119   | 11 | 27722298  | T | G     | 0.315 | -0.0152899 | 1.33E-06 | 3.48E-15  | Yes | No  |
| rs11031791  | 11 | 32469729  | T | A     | 0.394 | -0.0115235 | 1.26E-06 | 4.27E-10  | Yes | Yes |
| rs77403571  | 11 | 45913607  | A | G     | 0.060 | 0.0364128  | 2.65E-06 | 4.20E-21  | Yes | No  |
| rs10838684  | 11 | 47283862  | G | A     | 0.311 | 0.0419489  | 1.35E-06 | 1.27E-100 | Yes | No  |
| rs11229252  | 11 | 55129640  | T | C     | 0.113 | 0.0391144  | 2.10E-06 | 4.23E-37  | Yes | Yes |
| rs35366909  | 11 | 57065586  | T | C     | 0.047 | 0.0294414  | 3.02E-06 | 1.33E-11  | Yes | No  |
| rs12575459  | 11 | 58162382  | A | G     | 0.077 | 0.0189899  | 2.34E-06 | 2.65E-08  | Yes | No  |
| rs174564    | 11 | 61588305  | G | A     | 0.351 | -0.0458541 | 1.30E-06 | 1.46E-129 | Yes | No  |
| rs56271783  | 11 | 64004723  | C | G     | 0.047 | -0.050479  | 2.92E-06 | 1.74E-32  | Yes | No  |
| rs10750766  | 11 | 65473798  | A | C     | 0.710 | -0.0179201 | 1.37E-06 | 2.77E-19  | Yes | No  |
| rs4930352   | 11 | 66066993  | T | G     | 0.491 | 0.010935   | 1.26E-06 | 2.54E-09  | Yes | No  |
| rs12794995  | 11 | 67372946  | A | G     | 0.258 | 0.0115744  | 1.42E-06 | 2.26E-08  | Yes | No  |
| rs2003892   | 11 | 68593929  | A | G     | 0.334 | -0.0144655 | 1.35E-06 | 1.26E-13  | Yes | No  |
| rs673335    | 11 | 75450576  | C | T     | 0.174 | -0.0299251 | 1.63E-06 | 1.82E-36  | Yes | No  |
| rs10891054  | 11 | 109966513 | C | A     | 0.695 | -0.0164975 | 1.36E-06 | 5.72E-17  | Yes | No  |
| rs964184    | 11 | 116648917 | C | G     | 0.865 | 0.108211   | 1.80E-06 | 0         | Yes | Yes |
| rs192489212 | 11 | 117220429 | C | A     | 0.002 | 0.663639   | 1.84E-05 | 1.10E-144 | No  | No  |
| rs3825061   | 11 | 118944675 | T | C     | 0.386 | -0.0159004 | 1.27E-06 | 8.19E-18  | Yes | No  |
| rs6589939   | 11 | 122518525 | G | A     | 0.383 | 0.02413    | 1.28E-06 | 1.59E-38  | Yes | Yes |
| rs73632737  | 11 | 126226775 | C | G     | 0.072 | -0.0366335 | 2.36E-06 | 2.51E-26  | Yes | No  |
| rs56196860  | 12 | 2908330   | A | C     | 0.026 | 0.0336444  | 3.99E-06 | 6.43E-09  | No  | No  |
| rs7298463   | 12 | 6663964   | C | G     | 0.171 | -0.018262  | 1.67E-06 | 7.30E-14  | Yes | No  |
| rs7305678   | 12 | 7681181   | G | T     | 0.859 | -0.020079  | 1.84E-06 | 5.11E-14  | Yes | No  |
| rs4883201   | 12 | 9082581   | G | A     | 0.105 | -0.0270081 | 2.03E-06 | 4.92E-20  | Yes | No  |
| rs11045172  | 12 | 20470221  | C | A     | 0.199 | 0.0265875  | 1.56E-06 | 1.17E-31  | Yes | Yes |
| rs10842703  | 12 | 26456188  | T | A     | 0.251 | -0.0122468 | 1.42E-06 | 3.57E-09  | Yes | No  |
| rs1126930   | 12 | 49399132  | C | G     | 0.034 | -0.0294202 | 3.45E-06 | 4.33E-09  | Yes | No  |
| rs7132908   | 12 | 50263148  | A | G     | 0.385 | -0.0113633 | 1.27E-06 | 8.28E-10  | Yes | No  |
| rs9943712   | 12 | 51160715  | T | C     | 0.391 | 0.0107399  | 1.28E-06 | 8.24E-09  | Yes | No  |
| rs11170538  | 12 | 53796744  | C | T     | 0.476 | -0.0156092 | 1.56E-06 | 4.88E-14  | No  | No  |
| rs11171739  | 12 | 56470625  | T | C     | 0.578 | -0.0111703 | 1.25E-06 | 9.31E-10  | Yes | No  |
| rs73119306  | 12 | 57826982  | G | A     | 0.249 | 0.0274664  | 1.44E-06 | 3.77E-39  | Yes | No  |
| rs12368865  | 12 | 58422642  | G | A     | 0.096 | 0.0207915  | 2.12E-06 | 1.77E-11  | Yes | No  |
| rs1012306   | 12 | 101888063 | T | C     | 0.558 | 0.0100538  | 1.26E-06 | 4.16E-08  | Yes | Yes |
| rs11114022  | 12 | 109050204 | A | G     | 0.360 | -0.011738  | 1.37E-06 | 1.95E-09  | Yes | No  |
| rs2338104   | 12 | 109895168 | G | C     | 0.528 | 0.0283678  | 1.24E-06 | 2.35E-55  | No  | No  |
| rs3184504   | 12 | 111884608 | C | T     | 0.527 | 0.0221089  | 1.26E-06 | 8.78E-34  | Yes | No  |
| rs10774579  | 12 | 121405210 | C | T     | 0.481 | -0.0148137 | 1.24E-06 | 2.48E-16  | Yes | No  |
| rs12369179  | 12 | 122963550 | T | C     | 0.083 | -0.0317251 | 2.23E-06 | 1.63E-22  | Yes | No  |
| rs12366872  | 12 | 123804721 | C | G     | 0.095 | 0.043415   | 2.11E-06 | 3.07E-45  | Yes | Yes |
| rs7133378   | 12 | 124409502 | A | G     | 0.320 | 0.0333465  | 1.33E-06 | 6.97E-66  | Yes | No  |
| rs61941677  | 12 | 125325010 | G | C     | 0.130 | -0.0616162 | 1.90E-06 | 1.52E-110 | Yes | No  |
| rs76428106  | 13 | 28604007  | C | T     | 0.012 | -0.0610701 | 6.25E-06 | 1.67E-11  | No  | No  |
| rs78424108  | 13 | 41673457  | G | C     | 0.071 | -0.0255808 | 2.42E-06 | 4.10E-13  | Yes | No  |
| rs549058    | 13 | 51201045  | T | G     | 0.125 | 0.0182085  | 1.87E-06 | 2.53E-11  | Yes | No  |
| rs9537803   | 13 | 58366634  | T | C     | 0.721 | 0.0111516  | 1.38E-06 | 3.31E-08  | Yes | No  |
| rs200748895 | 13 | 108960380 | T | TGCTG | 0.019 | -0.0445135 | 5.39E-06 | 1.27E-09  | No  | No  |
| rs9604045   | 13 | 113927208 | T | G     | 0.239 | 0.0168561  | 1.71E-06 | 2.31E-12  | No  | No  |
| rs1955512   | 14 | 33175822  | A | G     | 0.571 | 0.0102855  | 1.30E-06 | 4.35E-08  | Yes | No  |
| rs8022053   | 14 | 65867947  | G | T     | 0.666 | 0.0107806  | 1.34E-06 | 2.84E-08  | Yes | No  |
| rs72729582  | 14 | 69149372  | G | A     | 0.073 | 0.0230866  | 2.42E-06 | 5.95E-11  | Yes | No  |
| rs1044527   | 14 | 70833819  | G | C     | 0.462 | -0.0103927 | 1.25E-06 | 1.22E-08  | No  | No  |
| rs13379043  | 14 | 74250126  | C | T     | 0.271 | 0.0187991  | 1.40E-06 | 3.01E-20  | Yes | No  |
| rs8021280   | 14 | 75290018  | G | C     | 0.463 | -0.0100281 | 1.25E-06 | 3.61E-08  | No  | No  |
| rs2371562   | 14 | 81619474  | A | C     | 0.263 | 0.0113865  | 1.42E-06 | 3.54E-08  | Yes | No  |
| rs3825667   | 14 | 89804373  | A | T     | 0.805 | 0.0152946  | 1.57E-06 | 2.19E-11  | Yes | No  |
| rs113953439 | 14 | 100380290 | A | G     | 0.175 | -0.0139381 | 1.64E-06 | 5.31E-09  | Yes | No  |
| rs12888955  | 14 | 103256877 | A | G     | 0.654 | 0.0130983  | 1.30E-06 | 4.26E-12  | Yes | No  |
| rs2494747   | 14 | 105258437 | T | G     | 0.615 | -0.0260436 | 1.36E-06 | 7.31E-41  | Yes | No  |
| rs275179    | 15 | 39447529  | G | A     | 0.158 | 0.0150309  | 1.71E-06 | 1.64E-09  | Yes | No  |
| rs3803357   | 15 | 40751555  | A | C     | 0.493 | 0.0107287  | 1.24E-06 | 3.26E-09  | Yes | No  |
| rs7170463   | 15 | 41888918  | G | A     | 0.312 | 0.013358   | 1.36E-06 | 1.56E-11  | Yes | No  |
| rs55707100  | 15 | 43820717  | T | C     | 0.026 | -0.101589  | 3.86E-06 | 1.04E-72  | Yes | No  |
| rs1901529   | 15 | 45001900  | G | A     | 0.120 | -0.0167127 | 2.02E-06 | 1.27E-08  | Yes | No  |
| rs261290    | 15 | 58678720  | C | T     | 0.655 | -0.106053  | 1.30E-06 | 0         | Yes | No  |

|             |    |          |   |     |       |            |          |           |     |     |
|-------------|----|----------|---|-----|-------|------------|----------|-----------|-----|-----|
| rs112147665 | 15 | 59277019 | C | T   | 0.002 | 0.301863   | 1.97E-05 | 1.21E-38  | No  | No  |
| rs187359403 | 15 | 59780362 | G | C   | 0.002 | 0.15504    | 2.09E-05 | 7.11E-09  | No  | No  |
| rs10851698  | 15 | 61947694 | T | C   | 0.264 | -0.012561  | 1.40E-06 | 7.14E-10  | Yes | No  |
| rs4619348   | 15 | 63359564 | C | A   | 0.565 | 0.0164447  | 1.25E-06 | 2.03E-19  | Yes | Yes |
| rs58633453  | 15 | 63939033 | A | AC  | 0.578 | 0.0127269  | 1.53E-06 | 4.73E-10  | No  | No  |
| rs2469128   | 15 | 66877172 | A | G   | 0.440 | 0.0100007  | 1.25E-06 | 4.03E-08  | Yes | No  |
| rs56332871  | 15 | 96714816 | A | C   | 0.270 | 0.0111343  | 1.40E-06 | 4.96E-08  | Yes | No  |
| rs7404696   | 16 | 1012393  | C | T   | 0.274 | 0.0144949  | 1.44E-06 | 2.06E-12  | Yes | No  |
| rs62025680  | 16 | 11464263 | A | G   | 0.203 | 0.0159799  | 1.56E-06 | 2.46E-12  | Yes | No  |
| rs12928099  | 16 | 15150505 | A | C   | 0.297 | 0.0181148  | 1.36E-06 | 7.55E-20  | Yes | No  |
| rs9938120   | 16 | 19977733 | T | C   | 0.137 | 0.0144557  | 1.81E-06 | 4.59E-08  | Yes | No  |
| rs3814883   | 16 | 29994922 | T | C   | 0.469 | -0.0127004 | 1.27E-06 | 6.40E-12  | Yes | No  |
| rs41440449  | 16 | 31337677 | G | A   | 0.340 | 0.0104103  | 1.30E-06 | 3.81E-08  | Yes | No  |
| rs56094641  | 16 | 53806453 | G | A   | 0.410 | -0.0194015 | 1.26E-06 | 3.23E-26  | Yes | No  |
| rs532566544 | 16 | 55793904 | C | A   | 0.001 | 0.311028   | 4.56E-05 | 3.02E-10  | No  | No  |
| rs560117104 | 16 | 56393734 | C | CCT | 0.006 | -0.222071  | 1.01E-05 | 2.80E-60  | No  | No  |
| rs183130    | 16 | 56991363 | T | C   | 0.321 | 0.22933    | 1.32E-06 | 0         | Yes | No  |
| rs12924311  | 16 | 57551366 | T | C   | 0.033 | -0.0527638 | 3.51E-06 | 6.37E-25  | Yes | No  |
| rs567124999 | 16 | 58191848 | A | T   | 0.001 | 0.546547   | 8.08E-05 | 4.37E-11  | No  | No  |
| rs117365265 | 16 | 66461927 | A | G   | 0.021 | -0.0442457 | 4.38E-06 | 4.05E-12  | Yes | No  |
| rs55781197  | 16 | 67940350 | G | A   | 0.122 | 0.0702085  | 1.88E-06 | 4.04E-144 | Yes | No  |
| rs571298027 | 16 | 68866671 | G | C   | 0.000 | -0.509566  | 3.52E-05 | 2.05E-27  | No  | No  |
| rs141904578 | 16 | 69538239 | T | A   | 0.037 | -0.0320828 | 3.47E-06 | 1.86E-10  | No  | No  |
| rs940922629 | 16 | 70587724 | C | T   | 0.002 | -0.39946   | 0.000146 | 6.14E-11  | No  | No  |
| rs745977021 | 16 | 72852502 | G | A   | 0.000 | -0.78526   | 0.000147 | 1.61E-09  | No  | No  |
| rs11149803  | 16 | 75195765 | G | C   | 0.311 | 0.0111756  | 1.37E-06 | 1.49E-08  | Yes | No  |
| rs2925979   | 16 | 81534790 | C | T   | 0.699 | 0.0347222  | 1.35E-06 | 3.29E-70  | Yes | Yes |
| rs896263    | 16 | 85927519 | G | C   | 0.241 | 0.0126468  | 1.51E-06 | 6.74E-09  | Yes | Yes |
| rs12931143  | 16 | 88006065 | C | T   | 0.478 | -0.0120075 | 1.31E-06 | 1.79E-10  | Yes | No  |
| rs36049560  | 16 | 88535620 | G | A   | 0.310 | -0.0125811 | 1.40E-06 | 4.42E-10  | Yes | No  |
| rs11870735  | 17 | 481604   | T | C   | 0.176 | -0.0156151 | 1.63E-06 | 4.82E-11  | Yes | No  |
| rs12449758  | 17 | 3884026  | G | A   | 0.305 | -0.0113088 | 1.36E-06 | 1.17E-08  | Yes | No  |
| rs3803800   | 17 | 7462969  | G | A   | 0.783 | 0.0189566  | 1.50E-06 | 3.84E-18  | Yes | No  |
| rs6503091   | 17 | 8109598  | A | G   | 0.610 | -0.0105406 | 1.27E-06 | 1.41E-08  | Yes | No  |
| rs28583584  | 17 | 17483297 | A | G   | 0.061 | -0.0254357 | 2.60E-06 | 2.07E-11  | Yes | No  |
| rs881844    | 17 | 37810218 | G | C   | 0.663 | 0.0303148  | 1.33E-06 | 1.27E-55  | Yes | Yes |
| rs2586116   | 17 | 38505824 | G | C   | 0.253 | -0.0130752 | 1.50E-06 | 1.56E-09  | Yes | No  |
| rs180705493 | 17 | 40359483 | A | G   | 0.003 | -0.112174  | 1.26E-05 | 3.20E-10  | No  | No  |
| rs200576810 | 17 | 41166479 | T | TTC | 0.012 | -0.089826  | 7.36E-06 | 2.22E-19  | No  | No  |
| rs72836561  | 17 | 41926126 | T | C   | 0.030 | -0.187095  | 3.63E-06 | 3.28E-275 | Yes | No  |
| rs72828813  | 17 | 42984085 | T | C   | 0.014 | -0.061509  | 5.51E-06 | 1.63E-14  | Yes | No  |
| rs4264433   | 17 | 45737275 | T | A   | 0.510 | -0.0145091 | 1.29E-06 | 4.89E-15  | No  | No  |
| rs115271198 | 17 | 46319476 | T | C   | 0.071 | 0.0279303  | 2.45E-06 | 5.25E-15  | Yes | No  |
| rs35895680  | 17 | 47060322 | A | C   | 0.314 | 0.012067   | 1.37E-06 | 1.24E-09  | Yes | No  |
| rs12940636  | 17 | 53400110 | C | T   | 0.345 | 0.0115518  | 1.30E-06 | 1.29E-09  | Yes | No  |
| rs9915591   | 17 | 65826090 | G | C   | 0.202 | -0.0141955 | 1.54E-06 | 2.77E-10  | Yes | No  |
| rs34931250  | 17 | 66879927 | T | C   | 0.060 | -0.0502261 | 2.68E-06 | 3.41E-38  | No  | No  |
| rs7214563   | 17 | 74214276 | T | C   | 0.076 | -0.0187203 | 2.33E-06 | 3.97E-08  | Yes | No  |
| rs2376583   | 17 | 76402105 | T | A   | 0.504 | 0.0294916  | 1.23E-06 | 2.15E-60  | No  | No  |
| rs6506032   | 18 | 287534   | A | G   | 0.073 | 0.0217664  | 2.35E-06 | 2.17E-10  | No  | No  |
| rs1652343   | 18 | 21131929 | C | T   | 0.493 | 0.0130372  | 1.24E-06 | 5.28E-13  | Yes | No  |
| rs144242131 | 18 | 29769910 | A | G   | 0.001 | -0.187716  | 2.66E-05 | 1.63E-09  | No  | No  |
| rs1518166   | 18 | 40705900 | G | A   | 0.379 | 0.0114137  | 1.28E-06 | 1.02E-09  | Yes | No  |
| rs538969346 | 18 | 46545976 | C | G   | 0.010 | 0.157629   | 6.71E-06 | 3.00E-60  | No  | No  |
| rs1943977   | 18 | 47173181 | G | A   | 0.826 | 0.0754744  | 1.63E-06 | 3.94E-220 | Yes | No  |
| rs76511906  | 18 | 47698555 | A | G   | 0.012 | 0.0936806  | 5.94E-06 | 2.37E-27  | No  | No  |
| NA          | 18 | 48570324 | G | A   | 0.002 | 0.750597   | 0.000566 | 3.57E-09  | No  | No  |
| rs41292412  | 18 | 56118358 | T | C   | 0.010 | -0.0607068 | 6.44E-06 | 9.29E-11  | No  | No  |
| rs35693910  | 18 | 57913965 | A | G   | 0.271 | -0.0202312 | 1.79E-06 | 5.64E-18  | Yes | No  |
| rs12454712  | 18 | 60845884 | C | T   | 0.380 | 0.0116847  | 1.35E-06 | 1.54E-09  | No  | No  |
| rs12975319  | 19 | 3414088  | A | G   | 0.305 | -0.0153128 | 1.38E-06 | 1.60E-14  | Yes | Yes |
| rs2289863   | 19 | 4028783  | T | C   | 0.750 | -0.0167291 | 1.51E-06 | 1.77E-14  | No  | No  |
| rs10853981  | 19 | 4965064  | A | G   | 0.333 | -0.0114931 | 1.33E-06 | 2.70E-09  | Yes | No  |
| rs112659531 | 19 | 7238475  | C | T   | 0.188 | -0.0170911 | 1.58E-06 | 1.28E-13  | Yes | No  |
| rs116843064 | 19 | 8429323  | A | G   | 0.020 | 0.214779   | 4.46E-06 | 3.79E-241 | Yes | No  |
| rs555628099 | 19 | 8945880  | G | A   | 0.004 | 0.0822218  | 9.69E-06 | 4.52E-09  | No  | No  |
| rs56322906  | 19 | 11346155 | A | G   | 0.039 | -0.0791286 | 3.14E-06 | 6.74E-67  | Yes | No  |
| rs60570301  | 19 | 18597196 | A | G   | 0.121 | 0.0159804  | 1.95E-06 | 1.73E-08  | Yes | No  |
| rs4805881   | 19 | 33896432 | C | A   | 0.666 | 0.019606   | 1.31E-06 | 1.20E-24  | Yes | No  |
| rs62122148  | 19 | 35492575 | A | G   | 0.318 | 0.0113102  | 1.36E-06 | 1.02E-08  | Yes | No  |
| rs56254331  | 19 | 41826020 | C | A   | 0.163 | 0.0163287  | 1.73E-06 | 6.19E-11  | Yes | No  |
| rs4760      | 19 | 44153100 | G | A   | 0.149 | -0.0165489 | 1.74E-06 | 6.62E-11  | No  | No  |

|             |    |          |   |   |       |            |          |           |     |     |
|-------------|----|----------|---|---|-------|------------|----------|-----------|-----|-----|
| rs141226346 | 19 | 44890969 | G | C | 0.002 | 0.159161   | 1.88E-05 | 7.04E-10  | No  | No  |
| rs429358    | 19 | 45411941 | C | T | 0.152 | -0.0861765 | 1.73E-06 | 5.84E-256 | No  | No  |
| rs34514836  | 19 | 46385438 | C | A | 0.111 | -0.0306264 | 1.96E-06 | 9.50E-27  | Yes | No  |
| rs12609461  | 19 | 47581464 | C | A | 0.683 | -0.0157891 | 1.35E-06 | 7.94E-16  | Yes | No  |
| rs3112494   | 19 | 48105826 | T | C | 0.867 | 0.017953   | 1.82E-06 | 1.47E-11  | Yes | No  |
| rs28873836  | 19 | 52314655 | C | G | 0.265 | -0.0207095 | 1.40E-06 | 5.89E-24  | Yes | No  |
| rs367070    | 19 | 54800500 | G | A | 0.219 | 0.0555795  | 1.52E-06 | 6.61E-140 | Yes | No  |
| rs151235402 | 20 | 569164   | T | C | 0.017 | -0.0676011 | 4.98E-06 | 1.11E-20  | Yes | No  |
| rs1054787   | 20 | 17600114 | C | G | 0.156 | -0.0181091 | 1.71E-06 | 3.17E-13  | Yes | No  |
| rs7266471   | 20 | 30220599 | A | T | 0.164 | 0.0154312  | 1.68E-06 | 3.07E-10  | Yes | No  |
| rs12624640  | 20 | 32952125 | A | G | 0.429 | -0.0179233 | 1.28E-06 | 4.68E-22  | Yes | Yes |
| rs1800961   | 20 | 43042364 | T | C | 0.034 | -0.133595  | 3.44E-06 | 2.98E-157 | Yes | Yes |
| rs2743402   | 20 | 43985204 | C | T | 0.762 | 0.0128977  | 1.45E-06 | 1.15E-09  | Yes | No  |
| rs6065908   | 20 | 44569930 | T | C | 0.187 | -0.0595686 | 1.58E-06 | 2.46E-146 | Yes | No  |
| rs55966194  | 20 | 45599090 | G | C | 0.274 | 0.0116153  | 1.39E-06 | 9.92E-09  | Yes | No  |
| rs4239651   | 20 | 46340596 | C | T | 0.797 | 0.0249398  | 1.56E-06 | 3.00E-28  | Yes | Yes |
| rs6096939   | 20 | 51034268 | C | G | 0.362 | 0.0109737  | 1.29E-06 | 5.98E-09  | Yes | No  |
| rs6123685   | 20 | 55836040 | A | G | 0.251 | 0.01273    | 1.50E-06 | 4.21E-09  | No  | No  |
| rs8126001   | 20 | 62711459 | T | C | 0.484 | 0.0135804  | 1.45E-06 | 2.37E-12  | Yes | No  |
| rs4818226   | 21 | 42633065 | G | A | 0.677 | -0.0110549 | 1.33E-06 | 1.15E-08  | Yes | No  |
| rs235314    | 21 | 46271452 | T | C | 0.523 | -0.0176913 | 1.26E-06 | 3.38E-22  | Yes | Yes |
| rs9976784   | 21 | 46907479 | A | G | 0.201 | -0.0185235 | 1.55E-06 | 1.89E-16  | Yes | No  |
| rs2070512   | 22 | 21949411 | C | A | 0.205 | -0.036325  | 1.53E-06 | 1.76E-59  | Yes | No  |
| rs9608956   | 22 | 30901592 | C | T | 0.251 | -0.0165122 | 1.42E-06 | 1.58E-15  | Yes | Yes |
| rs9610329   | 22 | 36042986 | T | C | 0.436 | -0.0105407 | 1.31E-06 | 2.83E-08  | No  | No  |
| rs4820325   | 22 | 38599978 | A | G | 0.582 | -0.0196419 | 1.27E-06 | 2.37E-26  | Yes | No  |
| rs4821815   | 22 | 39105707 | A | G | 0.333 | -0.0118793 | 1.32E-06 | 6.16E-10  | Yes | No  |
| rs2294915   | 22 | 44340904 | T | C | 0.239 | -0.0131713 | 1.45E-06 | 4.76E-10  | Yes | No  |



50 **Supplemental Table 6.** SNPs included in triglyceride-related analyses.

51

| RSID        | Chrom. | Position  | Effect allele | Other allele | Effect allele freq. | Beta        | SE       | p-value   | Used in MR | Used in MR + Steiger filt. |
|-------------|--------|-----------|---------------|--------------|---------------------|-------------|----------|-----------|------------|----------------------------|
| rs6605083   | 1      | 2147162   | C             | T            | 0.233               | 0.0119684   | 1.49E-06 | 6.45E-09  | Yes        | No                         |
| rs7538833   | 1      | 16504381  | C             | T            | 0.628               | 0.0111822   | 1.27E-06 | 2.58E-10  | Yes        | No                         |
| rs7551124   | 1      | 23785760  | T             | C            | 0.874               | 0.0174888   | 1.85E-06 | 1.09E-11  | Yes        | No                         |
| rs213641    | 1      | 26232356  | A             | C            | 0.593               | 0.00960533  | 1.27E-06 | 4.97E-08  | Yes        | No                         |
| rs114165349 | 1      | 27021913  | C             | G            | 0.023               | 0.0684903   | 4.08E-06 | 1.81E-33  | Yes        | No                         |
| rs4660690   | 1      | 39819503  | A             | G            | 0.215               | 0.0206177   | 1.49E-06 | 2.92E-23  | Yes        | No                         |
| rs61781290  | 1      | 40393160  | G             | A            | 0.262               | 0.0132882   | 1.39E-06 | 5.97E-12  | Yes        | No                         |
| rs12078980  | 1      | 51508526  | C             | T            | 0.092               | -0.0222738  | 2.13E-06 | 5.86E-14  | Yes        | No                         |
| rs1883783   | 1      | 54890956  | G             | T            | 0.581               | 0.0137463   | 1.26E-06 | 2.83E-15  | Yes        | Yes                        |
| rs188503412 | 1      | 61680217  | G             | A            | 0.001               | -0.362757   | 4.98E-05 | 1.98E-14  | No         | No                         |
| rs10889333  | 1      | 62957030  | A             | G            | 0.334               | -0.0713472  | 1.31E-06 | 0         | Yes        | Yes                        |
| rs574313788 | 1      | 63679932  | A             | C            | 1.000               | 0.493268    | 7.95E-05 | 3.71E-11  | No         | No                         |
| rs2613505   | 1      | 72835410  | T             | C            | 0.811               | 0.0139303   | 1.58E-06 | 2.54E-10  | Yes        | No                         |
| rs165316    | 1      | 91533297  | G             | A            | 0.200               | -0.0132725  | 1.53E-06 | 4.26E-10  | Yes        | No                         |
| rs12133907  | 1      | 93850283  | A             | C            | 0.609               | 0.0118584   | 1.28E-06 | 1.85E-11  | Yes        | No                         |
| rs4378243   | 1      | 98395881  | T             | G            | 0.826               | -0.0147155  | 1.64E-06 | 9.63E-11  | Yes        | No                         |
| rs646776    | 1      | 109818530 | T             | C            | 0.780               | 0.0113777   | 1.47E-06 | 2.53E-08  | Yes        | No                         |
| rs10494363  | 1      | 149909495 | A             | G            | 0.075               | -0.0269128  | 2.33E-06 | 9.74E-17  | Yes        | No                         |
| rs12750321  | 1      | 154251626 | G             | A            | 0.292               | -0.0148669  | 1.37E-06 | 4.59E-15  | Yes        | No                         |
| rs7539464   | 1      | 172359576 | A             | T            | 0.570               | -0.0131357  | 1.24E-06 | 2.69E-14  | No         | No                         |
| rs115276619 | 1      | 184865132 | A             | T            | 0.016               | -0.0497207  | 5.06E-06 | 1.61E-12  | Yes        | No                         |
| rs2821228   | 1      | 203517723 | G             | C            | 0.537               | -0.0133718  | 1.35E-06 | 3.12E-13  | No         | No                         |
| rs11240358  | 1      | 205070573 | A             | G            | 0.397               | 0.013375    | 1.26E-06 | 2.03E-14  | Yes        | Yes                        |
| rs1337101   | 1      | 219726100 | T             | G            | 0.313               | -0.020048   | 1.35E-06 | 5.19E-27  | Yes        | No                         |
| rs2642438   | 1      | 220970028 | G             | A            | 0.706               | -0.0157453  | 1.35E-06 | 4.56E-17  | Yes        | No                         |
| rs2281721   | 1      | 230297136 | T             | C            | 0.610               | -0.0444727  | 1.25E-06 | 3.36E-144 | Yes        | No                         |
| rs75054794  | 1      | 230823363 | G             | A            | 0.052               | 0.0232243   | 2.81E-06 | 2.78E-09  | Yes        | No                         |
| rs17713879  | 2      | 254215    | A             | G            | 0.368               | -0.0111716  | 1.28E-06 | 3.04E-10  | Yes        | No                         |
| rs3820897   | 2      | 3642361   | C             | T            | 0.807               | 0.0161779   | 1.57E-06 | 1.03E-13  | Yes        | No                         |
| rs12478327  | 2      | 20374249  | C             | A            | 0.487               | -0.0171517  | 1.23E-06 | 1.00E-23  | Yes        | No                         |
| rs676210    | 2      | 21231524  | A             | G            | 0.214               | -0.0704109  | 1.48E-06 | 1.16E-254 | Yes        | No                         |
| rs62128360  | 2      | 26309420  | G             | T            | 0.070               | 0.0205154   | 2.40E-06 | 8.38E-10  | Yes        | No                         |
| rs57035494  | 2      | 26924018  | G             | C            | 0.038               | -0.0383752  | 3.23E-06 | 1.15E-17  | Yes        | No                         |
| rs1260326   | 2      | 27730940  | C             | T            | 0.609               | -0.110708   | 1.25E-06 | 0         | Yes        | No                         |
| rs72780006  | 2      | 28599749  | A             | G            | 0.099               | 0.0343261   | 2.27E-06 | 1.09E-27  | No         | No                         |
| rs72616903  | 2      | 43743012  | C             | T            | 0.165               | 0.0146626   | 1.67E-06 | 2.74E-10  | Yes        | No                         |
| rs17326656  | 2      | 48962291  | T             | G            | 0.231               | 0.0126477   | 1.46E-06 | 5.06E-10  | Yes        | No                         |
| rs1861410   | 2      | 58933591  | T             | C            | 0.551               | -0.0108161  | 1.24E-06 | 3.52E-10  | Yes        | No                         |
| rs3087898   | 2      | 61765074  | A             | G            | 0.424               | -0.00993216 | 1.24E-06 | 9.21E-09  | Yes        | No                         |
| rs2540949   | 2      | 65284231  | T             | A            | 0.383               | -0.019884   | 1.26E-06 | 1.01E-29  | Yes        | No                         |
| rs939136    | 2      | 66677531  | C             | G            | 0.662               | -0.0100461  | 1.31E-06 | 3.41E-08  | No         | No                         |
| rs6708784   | 2      | 111927379 | G             | A            | 0.496               | -0.0131009  | 1.24E-06 | 2.38E-14  | Yes        | Yes                        |
| rs13409360  | 2      | 113838102 | A             | G            | 0.398               | -0.0102795  | 1.26E-06 | 4.10E-09  | Yes        | No                         |
| rs78198921  | 2      | 119749146 | G             | C            | 0.014               | 0.0436598   | 5.22E-06 | 1.79E-09  | Yes        | No                         |
| rs7578604   | 2      | 121308660 | T             | G            | 0.248               | 0.0161417   | 1.43E-06 | 4.29E-16  | Yes        | No                         |
| rs6430090   | 2      | 146347459 | G             | A            | 0.598               | -0.0104499  | 1.26E-06 | 2.33E-09  | Yes        | No                         |
| rs6743795   | 2      | 161122134 | G             | A            | 0.723               | 0.0112246   | 1.38E-06 | 5.16E-09  | Yes        | No                         |
| rs13389219  | 2      | 165528876 | T             | C            | 0.400               | -0.0335082  | 1.25E-06 | 5.27E-83  | Yes        | No                         |
| rs12472667  | 2      | 171629063 | G             | C            | 0.361               | 0.0100003   | 1.31E-06 | 2.90E-08  | Yes        | No                         |
| rs148566631 | 2      | 203447875 | A             | G            | 0.117               | 0.0177558   | 1.91E-06 | 2.26E-11  | Yes        | No                         |
| rs78058190  | 2      | 219699999 | A             | G            | 0.052               | 0.0766795   | 3.20E-06 | 9.79E-68  | No         | No                         |
| rs1024137   | 2      | 227095876 | T             | G            | 0.637               | 0.0342883   | 1.27E-06 | 7.77E-84  | Yes        | No                         |
| rs79639690  | 2      | 227605895 | C             | T            | 0.046               | 0.0236798   | 2.97E-06 | 1.00E-08  | Yes        | No                         |
| rs9812100   | 3      | 4763301   | A             | G            | 0.471               | -0.0117735  | 1.24E-06 | 6.21E-12  | Yes        | No                         |
| rs62246311  | 3      | 9498143   | A             | G            | 0.102               | 0.0162634   | 2.06E-06 | 9.90E-09  | Yes        | No                         |
| rs1801282   | 3      | 12393125  | G             | C            | 0.125               | -0.0270379  | 1.84E-06 | 4.85E-26  | Yes        | No                         |
| rs6792725   | 3      | 24520283  | G             | A            | 0.681               | -0.0159417  | 1.39E-06 | 1.09E-16  | No         | No                         |
| rs144323903 | 3      | 36981990  | CA            | C            | 0.508               | -0.0132743  | 1.62E-06 | 6.36E-11  | No         | No                         |
| rs4955411   | 3      | 49145304  | G             | A            | 0.776               | 0.0137496   | 1.51E-06 | 3.28E-11  | No         | No                         |
| rs17052061  | 3      | 52346240  | G             | T            | 0.169               | -0.0200737  | 1.64E-06 | 1.19E-18  | Yes        | No                         |
| rs12486424  | 3      | 66874481  | C             | A            | 0.289               | 0.0118231   | 1.35E-06 | 3.51E-10  | Yes        | No                         |
| rs13066793  | 3      | 87037543  | G             | A            | 0.091               | -0.0175987  | 2.18E-06 | 6.29E-09  | No         | No                         |
| rs684773    | 3      | 135956305 | C             | A            | 0.791               | 0.0253918   | 1.56E-06 | 1.79E-31  | Yes        | No                         |
| rs111834982 | 3      | 142019751 | G             | A            | 0.129               | -0.0142007  | 1.84E-06 | 2.83E-08  | Yes        | No                         |

|             |   |           |   |    |       |             |          |          |     |     |
|-------------|---|-----------|---|----|-------|-------------|----------|----------|-----|-----|
| rs9653945   | 3 | 142660706 | A | G  | 0.347 | -0.0131346  | 1.28E-06 | 1.97E-13 | Yes | No  |
| rs62271373  | 3 | 150066540 | A | T  | 0.053 | 0.035005    | 2.80E-06 | 2.19E-19 | Yes | No  |
| rs6787781   | 3 | 155535351 | C | G  | 0.270 | 0.0127098   | 1.42E-06 | 6.65E-11 | Yes | No  |
| rs9817452   | 3 | 156795414 | T | G  | 0.383 | -0.0178823  | 1.28E-06 | 7.61E-24 | Yes | No  |
| rs11924648  | 3 | 170717996 | G | A  | 0.128 | 0.020145    | 1.81E-06 | 1.49E-15 | Yes | No  |
| rs79287178  | 3 | 172294500 | A | G  | 0.029 | 0.0601879   | 3.77E-06 | 1.77E-30 | Yes | No  |
| rs34311866  | 4 | 951947    | C | T  | 0.182 | 0.017284    | 1.59E-06 | 5.68E-15 | Yes | No  |
| rs3775067   | 4 | 2888622   | A | G  | 0.386 | 0.0136097   | 1.28E-06 | 1.86E-14 | Yes | Yes |
| rs13108218  | 4 | 3443931   | G | A  | 0.614 | -0.0286405  | 1.31E-06 | 6.60E-57 | Yes | No  |
| rs4450871   | 4 | 4990298   | G | A  | 0.439 | -0.0146138  | 1.41E-06 | 1.13E-14 | No  | No  |
| rs9942171   | 4 | 18032487  | A | G  | 0.130 | 0.0208147   | 1.82E-06 | 1.87E-16 | Yes | No  |
| rs6448429   | 4 | 26066863  | T | C  | 0.164 | 0.0216715   | 1.66E-06 | 6.40E-21 | Yes | No  |
| rs35484700  | 4 | 55498781  | C | CG | 0.480 | -0.0105291  | 1.42E-06 | 1.34E-08 | No  | No  |
| rs9884390   | 4 | 69373407  | C | T  | 0.223 | 0.0168636   | 1.55E-06 | 2.46E-15 | Yes | No  |
| rs573930512 | 4 | 74512280  | A | G  | 0.002 | 0.156249    | 2.48E-05 | 1.56E-09 | No  | No  |
| rs10008637  | 4 | 77414144  | C | T  | 0.456 | 0.0104937   | 1.23E-06 | 8.17E-10 | Yes | No  |
| rs17449582  | 4 | 87240157  | T | C  | 0.358 | 0.0162529   | 1.28E-06 | 6.22E-20 | Yes | No  |
| rs17605615  | 4 | 87996745  | A | G  | 0.394 | 0.0272349   | 1.26E-06 | 1.36E-54 | Yes | Yes |
| rs2167750   | 4 | 89730074  | T | C  | 0.465 | 0.0121113   | 1.23E-06 | 1.22E-12 | Yes | No  |
| rs1126673   | 4 | 100045616 | T | C  | 0.694 | 0.0142118   | 1.33E-06 | 1.54E-14 | Yes | No  |
| rs13107325  | 4 | 103188709 | T | C  | 0.064 | 0.0372865   | 2.47E-06 | 1.76E-27 | Yes | No  |
| rs10017313  | 4 | 103861380 | G | A  | 0.486 | -0.00997113 | 1.24E-06 | 7.60E-09 | Yes | No  |
| rs138307849 | 4 | 110095620 | C | T  | 0.006 | 0.121263    | 8.47E-06 | 7.10E-26 | No  | No  |
| rs114816312 | 4 | 110638824 | T | C  | 0.006 | 0.134231    | 8.26E-06 | 9.11E-33 | No  | No  |
| rs192929239 | 4 | 124641827 | G | A  | 0.013 | 0.0462829   | 5.58E-06 | 2.43E-09 | Yes | No  |
| rs7696969   | 4 | 143326714 | G | T  | 0.632 | -0.0118988  | 1.27E-06 | 1.89E-11 | Yes | No  |
| rs6054      | 4 | 155489608 | T | C  | 0.005 | 0.118104    | 9.92E-06 | 9.38E-19 | No  | No  |
| rs6822892   | 4 | 157734675 | G | A  | 0.330 | -0.0140865  | 1.31E-06 | 8.82E-15 | Yes | No  |
| rs79760705  | 5 | 53298716  | T | G  | 0.110 | 0.0258967   | 1.95E-06 | 1.71E-21 | Yes | No  |
| rs28650790  | 5 | 55861464  | T | C  | 0.181 | 0.0382226   | 1.58E-06 | 1.94E-67 | Yes | No  |
| rs151912    | 5 | 57607142  | T | A  | 0.589 | -0.0119062  | 1.27E-06 | 1.32E-11 | No  | No  |
| rs4976033   | 5 | 67714246  | G | A  | 0.406 | 0.0176192   | 1.28E-06 | 1.57E-23 | Yes | No  |
| rs10052346  | 5 | 78472599  | T | G  | 0.390 | -0.0112414  | 1.29E-06 | 2.47E-10 | Yes | No  |
| rs115912456 | 5 | 82815158  | G | A  | 0.042 | -0.0273591  | 3.05E-06 | 1.09E-10 | Yes | No  |
| rs6595187   | 5 | 118723609 | G | A  | 0.283 | -0.0192878  | 1.36E-06 | 2.89E-24 | Yes | No  |
| rs17764730  | 5 | 127357526 | T | C  | 0.232 | -0.0112479  | 1.47E-06 | 3.61E-08 | Yes | No  |
| rs253942    | 5 | 131320462 | T | C  | 0.062 | 0.0247988   | 2.53E-06 | 1.93E-12 | Yes | No  |
| rs72801474  | 5 | 132444128 | A | G  | 0.095 | -0.0301264  | 2.13E-06 | 3.22E-24 | Yes | No  |
| rs111998037 | 5 | 139798007 | C | A  | 0.257 | -0.0110462  | 1.42E-06 | 2.02E-08 | Yes | No  |
| rs12523418  | 5 | 141707225 | G | A  | 0.320 | -0.0103615  | 1.34E-06 | 2.29E-08 | Yes | No  |
| rs245078    | 5 | 149353598 | G | A  | 0.406 | -0.00975476 | 1.26E-06 | 2.36E-08 | Yes | No  |
| rs6882076   | 5 | 156390297 | C | T  | 0.635 | 0.0344004   | 1.27E-06 | 1.23E-84 | Yes | No  |
| rs2914231   | 5 | 158011435 | C | G  | 0.230 | 0.021926    | 1.46E-06 | 2.72E-27 | Yes | No  |
| rs72812818  | 5 | 173356752 | C | G  | 0.311 | 0.0107924   | 1.32E-06 | 4.06E-09 | Yes | No  |
| rs62397245  | 5 | 176750688 | G | C  | 0.231 | 0.0145686   | 1.46E-06 | 8.47E-13 | Yes | No  |
| rs6924805   | 6 | 18747705  | T | G  | 0.592 | -0.0100688  | 1.25E-06 | 7.49E-09 | Yes | No  |
| rs7451008   | 6 | 20673880  | C | T  | 0.267 | 0.0118633   | 1.38E-06 | 6.46E-10 | Yes | No  |
| rs9379828   | 6 | 26167951  | G | C  | 0.355 | -0.00997724 | 1.30E-06 | 2.86E-08 | Yes | No  |
| rs56114371  | 6 | 27274834  | T | C  | 0.089 | -0.0169634  | 2.22E-06 | 3.68E-08 | No  | No  |
| rs3131337   | 6 | 28796071  | C | G  | 0.106 | -0.0188271  | 2.11E-06 | 1.29E-10 | No  | No  |
| rs9258375   | 6 | 29752808  | G | A  | 0.102 | -0.0217211  | 2.30E-06 | 2.39E-12 | Yes | No  |
| rs3094034   | 6 | 30363351  | T | A  | 0.097 | -0.0329575  | 3.46E-06 | 2.16E-18 | No  | No  |
| rs9468937   | 6 | 31270118  | A | C  | 0.435 | 0.0280444   | 1.28E-06 | 6.90E-56 | Yes | No  |
| rs622871    | 6 | 31878495  | G | A  | 0.703 | 0.0281582   | 1.46E-06 | 3.15E-46 | Yes | No  |
| rs9461755   | 6 | 32441046  | A | G  | 0.046 | 0.0755246   | 3.23E-06 | 9.14E-69 | Yes | No  |
| rs144607208 | 6 | 32947516  | G | A  | 0.023 | 0.0651614   | 4.46E-06 | 2.68E-27 | Yes | No  |
| rs75507056  | 6 | 33457187  | T | C  | 0.016 | 0.0562096   | 5.39E-06 | 5.77E-14 | Yes | No  |
| rs6934083   | 6 | 35237153  | T | C  | 0.034 | 0.0263927   | 3.35E-06 | 1.44E-08 | Yes | No  |
| rs3176320   | 6 | 36646788  | G | A  | 0.339 | -0.0100726  | 1.30E-06 | 2.17E-08 | Yes | No  |
| rs742493    | 6 | 40998167  | C | T  | 0.116 | -0.0167097  | 1.90E-06 | 2.68E-10 | Yes | No  |
| rs7757363   | 6 | 42876386  | T | C  | 0.309 | 0.0103216   | 1.32E-06 | 2.09E-08 | Yes | Yes |
| rs998584    | 6 | 43757896  | A | C  | 0.479 | 0.0360954   | 1.29E-06 | 5.54E-94 | Yes | No  |
| rs2749005   | 6 | 52621433  | G | T  | 0.648 | -0.0186302  | 1.32E-06 | 9.25E-25 | Yes | No  |
| rs398085093 | 6 | 86296925  | C | CA | 0.398 | 0.0121528   | 1.50E-06 | 3.60E-10 | No  | No  |
| rs9496567   | 6 | 100602753 | A | G  | 0.236 | -0.0120741  | 1.45E-06 | 2.23E-09 | Yes | No  |
| rs6913325   | 6 | 106378009 | T | G  | 0.441 | -0.00969798 | 1.23E-06 | 1.61E-08 | Yes | No  |
| rs35045014  | 6 | 107432157 | A | C  | 0.462 | 0.0135114   | 1.32E-06 | 3.45E-14 | Yes | No  |
| rs9480889   | 6 | 109189021 | G | C  | 0.788 | 0.0151355   | 1.52E-06 | 7.10E-13 | Yes | No  |
| rs577721086 | 6 | 127440047 | C | T  | 0.052 | 0.0528261   | 2.82E-06 | 1.61E-41 | Yes | No  |
| rs7740188   | 6 | 130346105 | A | G  | 0.705 | 0.0143399   | 1.35E-06 | 2.00E-14 | Yes | No  |
| rs672457    | 6 | 139836562 | A | G  | 0.582 | -0.0262392  | 1.24E-06 | 1.98E-52 | Yes | No  |
| rs9321765   | 6 | 140595744 | C | T  | 0.208 | -0.0125852  | 1.52E-06 | 2.78E-09 | No  | No  |

|             |    |           |   |   |       |             |          |          |     |     |
|-------------|----|-----------|---|---|-------|-------------|----------|----------|-----|-----|
| rs607335    | 6  | 153465230 | A | C | 0.412 | -0.00981496 | 1.25E-06 | 1.68E-08 | Yes | No  |
| rs78425119  | 6  | 160501825 | A | G | 0.066 | 0.0345754   | 2.45E-06 | 4.38E-24 | Yes | No  |
| rs41272086  | 6  | 161008646 | A | G | 0.102 | 0.0386596   | 2.03E-06 | 1.45E-42 | Yes | No  |
| rs1464780   | 6  | 161520837 | A | G | 0.945 | 0.0225946   | 2.74E-06 | 3.01E-09 | Yes | No  |
| rs73029263  | 6  | 164113762 | G | A | 0.130 | -0.0188921  | 1.82E-06 | 9.09E-14 | Yes | No  |
| rs5011439   | 7  | 12268811  | C | G | 0.403 | 0.0101804   | 1.41E-06 | 4.30E-08 | No  | No  |
| rs38205     | 7  | 15913588  | C | A | 0.624 | -0.0126731  | 1.29E-06 | 1.23E-12 | Yes | Yes |
| rs4410790   | 7  | 17284577  | C | T | 0.632 | 0.0131573   | 1.27E-06 | 8.31E-14 | Yes | No  |
| rs4142995   | 7  | 17919258  | T | G | 0.392 | 0.0129524   | 1.26E-06 | 1.26E-13 | Yes | No  |
| rs55696093  | 7  | 21605973  | G | A | 0.210 | 0.0118305   | 1.51E-06 | 1.64E-08 | Yes | No  |
| rs4722551   | 7  | 25991826  | C | T | 0.163 | -0.0279113  | 1.65E-06 | 4.02E-34 | Yes | No  |
| rs849336    | 7  | 28224053  | G | A | 0.649 | -0.0102383  | 1.28E-06 | 9.27E-09 | Yes | No  |
| rs2070971   | 7  | 44197583  | T | G | 0.140 | 0.0291243   | 1.78E-06 | 3.44E-32 | Yes | Yes |
| rs71551223  | 7  | 71256489  | C | A | 0.030 | -0.0366084  | 3.72E-06 | 1.31E-12 | Yes | No  |
| rs36104871  | 7  | 71808047  | T | G | 0.029 | -0.0579807  | 3.89E-06 | 1.59E-27 | Yes | No  |
| rs35753501  | 7  | 72330303  | T | C | 0.026 | -0.0942105  | 4.15E-06 | 3.40E-60 | Yes | No  |
| rs3812316   | 7  | 73020337  | G | C | 0.124 | -0.121587   | 1.85E-06 | 0        | Yes | No  |
| rs3135688   | 7  | 73651743  | C | T | 0.040 | -0.0304901  | 3.17E-06 | 4.57E-12 | Yes | Yes |
| rs1057868   | 7  | 75615006  | T | C | 0.288 | 0.0118739   | 1.35E-06 | 2.51E-10 | Yes | No  |
| rs1229499   | 7  | 81573045  | A | T | 0.706 | -0.0110413  | 1.36E-06 | 5.65E-09 | Yes | Yes |
| rs2283038   | 7  | 106835410 | T | C | 0.235 | -0.0112869  | 1.48E-06 | 4.29E-08 | Yes | No  |
| rs10215153  | 7  | 116399131 | A | G | 0.311 | 0.0120159   | 1.34E-06 | 8.81E-11 | Yes | Yes |
| rs12534129  | 7  | 117018135 | C | T | 0.392 | 0.0120072   | 1.30E-06 | 1.61E-11 | Yes | No  |
| rs4731702   | 7  | 130433384 | T | C | 0.495 | -0.0248647  | 1.22E-06 | 1.11E-48 | Yes | No  |
| rs7808446   | 7  | 150214465 | G | T | 0.754 | -0.0160134  | 1.43E-06 | 9.38E-16 | Yes | No  |
| rs2921060   | 8  | 8317817   | C | A | 0.458 | -0.0159013  | 1.27E-06 | 2.55E-19 | Yes | No  |
| rs17149279  | 8  | 9195638   | T | C | 0.231 | -0.0186103  | 1.47E-06 | 9.58E-20 | Yes | No  |
| rs615632    | 8  | 9796321   | T | C | 0.525 | 0.0150368   | 1.29E-06 | 3.14E-17 | Yes | No  |
| rs7821812   | 8  | 10644101  | C | G | 0.205 | 0.0281306   | 1.52E-06 | 3.39E-40 | Yes | No  |
| rs4320509   | 8  | 11528339  | C | G | 0.127 | 0.0319964   | 1.89E-06 | 4.36E-34 | Yes | No  |
| rs28415552  | 8  | 13511219  | A | C | 0.631 | -0.0100524  | 1.27E-06 | 1.34E-08 | Yes | No  |
| rs1968041   | 8  | 17616562  | T | C | 0.358 | -0.0100629  | 1.29E-06 | 2.19E-08 | Yes | No  |
| rs35246381  | 8  | 18272535  | T | C | 0.778 | -0.0342271  | 1.46E-06 | 2.50E-63 | Yes | No  |
| rs2958557   | 8  | 19251679  | C | T | 0.992 | -0.0762122  | 7.60E-06 | 3.52E-13 | No  | No  |
| rs328       | 8  | 19819724  | G | C | 0.100 | -0.179736   | 2.03E-06 | 0        | Yes | No  |
| rs2616213   | 8  | 20610866  | C | T | 0.544 | -0.0103828  | 1.25E-06 | 2.12E-09 | Yes | No  |
| rs56193509  | 8  | 23525075  | A | T | 0.244 | 0.0109869   | 1.42E-06 | 2.80E-08 | Yes | No  |
| rs73221948  | 8  | 25464670  | T | G | 0.278 | 0.0134884   | 1.68E-06 | 1.21E-09 | No  | No  |
| rs7007256   | 8  | 26203081  | A | G | 0.712 | 0.0102662   | 1.35E-06 | 4.53E-08 | Yes | No  |
| rs7816345   | 8  | 36846109  | T | C | 0.169 | 0.014053    | 1.62E-06 | 4.34E-10 | Yes | No  |
| rs4647906   | 8  | 38325411  | A | G | 0.402 | 0.0125267   | 1.26E-06 | 7.16E-13 | Yes | No  |
| rs2081687   | 8  | 59388565  | C | T | 0.659 | -0.0231942  | 1.29E-06 | 2.01E-38 | Yes | No  |
| rs745578    | 8  | 72466324  | A | G | 0.245 | 0.0169094   | 1.43E-06 | 2.15E-17 | Yes | Yes |
| rs7830852   | 8  | 106415088 | G | A | 0.226 | 0.0115959   | 1.47E-06 | 1.32E-08 | Yes | No  |
| rs2737246   | 8  | 116659578 | C | G | 0.277 | -0.0124772  | 1.37E-06 | 5.48E-11 | Yes | No  |
| rs28601761  | 8  | 126500031 | G | C | 0.421 | -0.0893169  | 1.26E-06 | 0        | No  | No  |
| rs1561929   | 8  | 129567373 | T | C | 0.883 | 0.0158895   | 1.93E-06 | 2.74E-09 | Yes | Yes |
| rs7832515   | 8  | 144306379 | G | A | 0.197 | -0.0141355  | 1.58E-06 | 1.04E-10 | Yes | No  |
| rs7856817   | 9  | 1054587   | A | G | 0.173 | 0.0143397   | 1.62E-06 | 2.02E-10 | No  | No  |
| rs1658970   | 9  | 6664853   | A | C | 0.139 | 0.0139805   | 1.76E-06 | 1.07E-08 | Yes | Yes |
| rs7041117   | 9  | 13679856  | T | A | 0.583 | -0.0105964  | 1.24E-06 | 9.07E-10 | Yes | No  |
| rs686030    | 9  | 15304782  | A | C | 0.859 | 0.0167448   | 1.75E-06 | 6.58E-12 | Yes | No  |
| rs62543565  | 9  | 16901067  | A | C | 0.637 | -0.0158249  | 1.28E-06 | 5.48E-19 | Yes | No  |
| rs2383766   | 9  | 28412500  | T | G | 0.319 | 0.0100595   | 1.31E-06 | 3.68E-08 | Yes | No  |
| rs10971957  | 9  | 34151463  | T | C | 0.598 | -0.0111533  | 1.27E-06 | 2.37E-10 | Yes | No  |
| rs296883    | 9  | 86578925  | T | A | 0.264 | -0.0112733  | 1.40E-06 | 6.38E-09 | Yes | No  |
| rs17055001  | 9  | 92195246  | A | G | 0.311 | 0.0115782   | 1.33E-06 | 3.76E-10 | Yes | No  |
| rs1800978   | 9  | 107665978 | G | C | 0.123 | -0.0252201  | 1.89E-06 | 7.58E-22 | Yes | No  |
| rs11789974  | 9  | 110488875 | A | C | 0.032 | -0.0294302  | 3.52E-06 | 1.78E-09 | Yes | No  |
| rs75113691  | 9  | 112245773 | C | G | 0.036 | -0.0305867  | 3.30E-06 | 2.57E-11 | No  | No  |
| rs150611042 | 9  | 117083803 | A | C | 0.069 | -0.0198344  | 2.54E-06 | 1.80E-08 | Yes | No  |
| rs2416797   | 9  | 123480600 | A | C | 0.699 | 0.0113578   | 1.34E-06 | 1.14E-09 | Yes | No  |
| rs142122182 | 10 | 5263341   | G | A | 0.155 | -0.0213308  | 1.74E-06 | 4.34E-19 | Yes | No  |
| rs4934927   | 10 | 33628062  | C | G | 0.090 | 0.0180806   | 2.21E-06 | 2.39E-09 | Yes | No  |
| rs41274050  | 10 | 52573772  | T | C | 0.009 | 0.0860984   | 7.30E-06 | 3.19E-19 | No  | No  |
| rs1171616   | 10 | 61468589  | T | G | 0.775 | 0.0156446   | 1.48E-06 | 2.60E-14 | Yes | Yes |
| rs35706909  | 10 | 63922233  | C | T | 0.099 | -0.0178206  | 2.06E-06 | 4.84E-10 | Yes | No  |
| rs7924036   | 10 | 65191645  | T | G | 0.512 | -0.0292802  | 1.24E-06 | 1.73E-64 | Yes | No  |
| rs7904738   | 10 | 74710484  | C | G | 0.086 | 0.0239034   | 2.20E-06 | 6.29E-15 | Yes | No  |
| rs149590572 | 10 | 93575831  | A | G | 0.064 | 0.0247658   | 2.49E-06 | 9.53E-13 | Yes | No  |
| rs17875327  | 10 | 94274809  | G | A | 0.111 | 0.0240046   | 2.00E-06 | 4.88E-18 | Yes | No  |
| rs2068888   | 10 | 94839642  | A | G | 0.451 | -0.0291415  | 1.24E-06 | 8.25E-65 | Yes | Yes |

|             |    |           |   |    |       |             |          |           |     |     |
|-------------|----|-----------|---|----|-------|-------------|----------|-----------|-----|-----|
| rs7091593   | 10 | 95342772  | T | A  | 0.113 | 0.0177942   | 1.95E-06 | 4.96E-11  | Yes | No  |
| rs3891783   | 10 | 96015793  | G | C  | 0.434 | -0.0100667  | 1.24E-06 | 5.26E-09  | No  | No  |
| rs1408579   | 10 | 101912194 | T | C  | 0.482 | 0.00997137  | 1.22E-06 | 4.51E-09  | Yes | No  |
| rs75398587  | 10 | 103946480 | G | C  | 0.062 | -0.0265685  | 2.53E-06 | 4.98E-14  | Yes | No  |
| rs2803619   | 10 | 113934384 | C | G  | 0.718 | 0.0179132   | 1.35E-06 | 1.56E-21  | Yes | No  |
| rs2484294   | 10 | 115792062 | A | G  | 0.737 | -0.0105345  | 1.39E-06 | 4.68E-08  | Yes | No  |
| rs12772930  | 10 | 120493295 | A | G  | 0.353 | 0.0103304   | 1.29E-06 | 7.58E-09  | Yes | No  |
| rs1873449   | 10 | 122931652 | T | G  | 0.022 | -0.0367787  | 4.23E-06 | 3.73E-10  | Yes | No  |
| rs1133400   | 10 | 134459388 | G | A  | 0.213 | 0.0134112   | 1.52E-06 | 1.71E-10  | Yes | No  |
| rs537132753 | 10 | 135440683 | G | T  | 0.034 | 0.0355115   | 4.62E-06 | 2.60E-09  | No  | No  |
| rs117739035 | 11 | 408174    | T | G  | 0.036 | 0.0253911   | 3.39E-06 | 4.75E-08  | Yes | No  |
| rs4909945   | 11 | 10673739  | C | T  | 0.680 | 0.0134149   | 1.30E-06 | 1.45E-13  | Yes | No  |
| rs1037169   | 11 | 13361005  | C | T  | 0.683 | 0.0180982   | 1.36E-06 | 2.60E-22  | Yes | No  |
| rs150090666 | 11 | 14865399  | T | C  | 0.001 | -0.302766   | 2.52E-05 | 4.07E-22  | No  | No  |
| rs142108391 | 11 | 26216166  | A | G  | 0.063 | 0.0208814   | 2.52E-06 | 2.50E-09  | Yes | No  |
| rs1519480   | 11 | 27675712  | T | C  | 0.679 | -0.01485    | 1.31E-06 | 3.40E-16  | Yes | No  |
| rs75160368  | 11 | 30402714  | A | G  | 0.088 | -0.01732    | 2.22E-06 | 2.09E-08  | Yes | No  |
| rs117847116 | 11 | 46048240  | C | T  | 0.040 | -0.0269749  | 3.17E-06 | 1.02E-09  | Yes | No  |
| rs3758669   | 11 | 47272579  | G | A  | 0.310 | -0.0230282  | 1.33E-06 | 2.16E-35  | Yes | No  |
| rs541958245 | 11 | 56385221  | T | A  | 0.002 | -0.158508   | 2.52E-05 | 3.03E-08  | No  | No  |
| rs174562    | 11 | 61585144  | G | A  | 0.346 | 0.0522293   | 1.28E-06 | 1.91E-187 | Yes | No  |
| rs11231161  | 11 | 62378221  | G | A  | 0.358 | 0.0111123   | 1.29E-06 | 5.86E-10  | Yes | Yes |
| rs56271783  | 11 | 64004723  | C | G  | 0.047 | 0.0530991   | 2.89E-06 | 7.35E-40  | Yes | No  |
| rs10750766  | 11 | 65473798  | A | C  | 0.710 | 0.017147    | 1.36E-06 | 1.05E-19  | Yes | No  |
| rs10896373  | 11 | 68614810  | T | A  | 0.514 | -0.0141036  | 1.24E-06 | 2.44E-16  | No  | No  |
| rs10796821  | 11 | 69305417  | G | A  | 0.513 | 0.0096435   | 1.26E-06 | 2.42E-08  | Yes | No  |
| rs2063724   | 11 | 78133077  | C | T  | 0.173 | -0.0144717  | 1.64E-06 | 2.12E-10  | Yes | No  |
| rs759831202 | 11 | 115554537 | A | T  | 0.000 | -0.621662   | 7.47E-05 | 3.89E-17  | No  | No  |
| rs117288140 | 11 | 116139965 | T | C  | 0.017 | 0.0395228   | 5.04E-06 | 1.59E-08  | Yes | No  |
| rs964184    | 11 | 116648917 | C | G  | 0.865 | -0.246288   | 1.78E-06 | 0         | Yes | No  |
| rs192489212 | 11 | 117220429 | C | A  | 0.002 | -0.893298   | 1.81E-05 | 1.04E-292 | No  | No  |
| rs747437837 | 11 | 117849058 | G | C  | 0.001 | -0.413548   | 6.08E-05 | 8.34E-11  | No  | No  |
| rs749804194 | 11 | 118574327 | C | T  | 0.000 | -0.827719   | 0.000106 | 2.31E-16  | No  | No  |
| rs76895963  | 12 | 4384844   | G | T  | 0.018 | -0.10398    | 4.98E-06 | 5.11E-51  | No  | No  |
| rs73047887  | 12 | 6736843   | C | T  | 0.255 | 0.0113359   | 1.48E-06 | 3.26E-08  | Yes | No  |
| rs11045171  | 12 | 20470199  | G | A  | 0.200 | -0.0201072  | 1.55E-06 | 7.51E-21  | Yes | No  |
| rs4149056   | 12 | 21331549  | C | T  | 0.158 | 0.0270573   | 1.67E-06 | 2.25E-31  | Yes | Yes |
| rs11046481  | 12 | 22747967  | G | T  | 0.235 | -0.0154524  | 1.49E-06 | 9.88E-14  | Yes | Yes |
| rs17389465  | 12 | 25414408  | A | T  | 0.069 | -0.0199909  | 2.42E-06 | 2.82E-09  | Yes | No  |
| rs4963975   | 12 | 26443030  | A | G  | 0.250 | 0.0150408   | 1.42E-06 | 2.55E-14  | Yes | No  |
| rs10082956  | 12 | 29504556  | G | A  | 0.290 | -0.0127726  | 1.35E-06 | 1.15E-11  | Yes | No  |
| rs11183212  | 12 | 46213867  | G | A  | 0.202 | 0.0157919   | 1.55E-06 | 2.33E-13  | Yes | Yes |
| rs145878042 | 12 | 48143315  | G | A  | 0.011 | 0.0464549   | 5.81E-06 | 8.89E-09  | Yes | No  |
| rs1126930   | 12 | 49399132  | C | G  | 0.034 | 0.0279141   | 3.39E-06 | 3.05E-09  | Yes | No  |
| rs7312441   | 12 | 56941146  | A | C  | 0.345 | -0.0114274  | 1.33E-06 | 4.27E-10  | Yes | No  |
| rs79395356  | 12 | 57738600  | G | T  | 0.248 | -0.0248319  | 1.46E-06 | 4.52E-35  | Yes | No  |
| rs8756      | 12 | 66359752  | A | C  | 0.509 | 0.00972395  | 1.22E-06 | 9.37E-09  | Yes | No  |
| rs11615712  | 12 | 69619736  | T | A  | 0.448 | -0.00958192 | 1.27E-06 | 4.70E-08  | No  | No  |
| rs11113118  | 12 | 107199142 | A | G  | 0.235 | 0.0166424   | 1.45E-06 | 1.25E-16  | Yes | No  |
| rs4964736   | 12 | 109100503 | T | C  | 0.359 | 0.0101781   | 1.28E-06 | 1.16E-08  | Yes | No  |
| rs149793040 | 12 | 109661672 | G | A  | 0.001 | -0.215222   | 2.05E-05 | 2.91E-17  | No  | No  |
| rs2009170   | 12 | 111703313 | C | T  | 0.255 | -0.0127277  | 1.43E-06 | 1.20E-10  | Yes | No  |
| rs580063    | 12 | 123206340 | C | T  | 0.212 | -0.01712    | 1.51E-06 | 2.66E-16  | Yes | No  |
| rs12303671  | 12 | 124492610 | G | T  | 0.337 | -0.025901   | 1.31E-06 | 5.37E-46  | Yes | No  |
| rs11057840  | 12 | 125316055 | C | A  | 0.138 | 0.0190088   | 1.78E-06 | 1.36E-14  | Yes | No  |
| rs4770433   | 13 | 23903791  | G | A  | 0.449 | -0.0105335  | 1.22E-06 | 6.03E-10  | Yes | Yes |
| rs1340819   | 13 | 29145323  | C | A  | 0.337 | -0.00996674 | 1.31E-06 | 3.69E-08  | Yes | No  |
| rs398098735 | 13 | 31001091  | A | AT | 0.389 | -0.0125411  | 1.46E-06 | 4.15E-11  | No  | No  |
| rs138358301 | 13 | 45970147  | G | A  | 0.004 | 0.0711919   | 9.48E-06 | 4.23E-08  | No  | No  |
| rs2812208   | 13 | 50707087  | C | G  | 0.023 | -0.0480352  | 4.19E-06 | 1.55E-16  | Yes | No  |
| rs797482    | 13 | 51214613  | G | A  | 0.875 | 0.0149092   | 1.85E-06 | 6.72E-09  | Yes | No  |
| rs2298058   | 13 | 95248566  | T | C  | 0.316 | 0.0183947   | 1.33E-06 | 2.00E-23  | Yes | Yes |
| rs6602909   | 13 | 114551993 | C | T  | 0.330 | 0.0263997   | 1.35E-06 | 6.66E-46  | Yes | No  |
| rs72681869  | 14 | 50655357  | C | G  | 0.009 | -0.0542227  | 6.96E-06 | 1.57E-08  | No  | No  |
| rs12878001  | 14 | 64239629  | G | T  | 0.161 | 0.0207307   | 1.67E-06 | 4.82E-19  | Yes | No  |
| rs3825669   | 14 | 89804276  | G | A  | 0.805 | -0.0122844  | 1.56E-06 | 1.34E-08  | Yes | No  |
| rs61993685  | 14 | 100765823 | C | T  | 0.071 | -0.0194213  | 2.41E-06 | 6.12E-09  | Yes | No  |
| rs12891399  | 14 | 104293533 | C | T  | 0.339 | 0.0112518   | 1.30E-06 | 5.14E-10  | Yes | No  |
| rs28624578  | 15 | 31637666  | C | T  | 0.166 | 0.0134612   | 1.69E-06 | 7.93E-09  | Yes | No  |
| rs275179    | 15 | 39447529  | G | A  | 0.158 | -0.0154206  | 1.70E-06 | 6.88E-11  | Yes | No  |
| rs34245505  | 15 | 40397191  | G | C  | 0.188 | 0.0153228   | 1.66E-06 | 1.37E-11  | Yes | No  |
| rs72735627  | 15 | 41057507  | T | C  | 0.088 | -0.0206445  | 2.27E-06 | 5.46E-11  | Yes | No  |

|             |    |           |   |   |       |            |          |           |     |     |
|-------------|----|-----------|---|---|-------|------------|----------|-----------|-----|-----|
| rs8025212   | 15 | 41880619  | G | A | 0.324 | -0.01134   | 1.33E-06 | 8.38E-10  | Yes | No  |
| rs139661283 | 15 | 42384229  | A | G | 0.014 | 0.0603118  | 5.20E-06 | 7.84E-17  | Yes | No  |
| rs139974673 | 15 | 44027885  | C | T | 0.026 | 0.13397    | 3.83E-06 | 9.32E-140 | Yes | No  |
| rs1901529   | 15 | 45001900  | G | A | 0.121 | 0.0181697  | 2.01E-06 | 6.30E-11  | Yes | No  |
| rs72749502  | 15 | 57297078  | T | A | 0.070 | 0.0296693  | 2.45E-06 | 3.46E-18  | Yes | No  |
| rs1077835   | 15 | 58723426  | G | A | 0.216 | 0.0447226  | 1.49E-06 | 1.14E-103 | Yes | No  |
| rs112147665 | 15 | 59277019  | C | T | 0.002 | 0.183501   | 2.00E-05 | 2.71E-16  | No  | No  |
| rs12438742  | 15 | 61947280  | G | C | 0.560 | -0.0103506 | 1.24E-06 | 1.69E-09  | No  | No  |
| rs11635675  | 15 | 63793238  | G | T | 0.352 | 0.0235284  | 1.28E-06 | 6.14E-40  | Yes | Yes |
| rs12442852  | 15 | 64677413  | T | C | 0.881 | 0.0149168  | 1.94E-06 | 2.79E-08  | Yes | No  |
| rs2218181   | 15 | 66872325  | C | T | 0.346 | 0.0140202  | 1.28E-06 | 3.40E-15  | Yes | Yes |
| rs11072332  | 15 | 72108307  | T | G | 0.214 | -0.0122426 | 1.51E-06 | 5.05E-09  | Yes | No  |
| rs7164727   | 15 | 73093991  | T | C | 0.681 | 0.0109811  | 1.32E-06 | 2.19E-09  | Yes | No  |
| rs1037117   | 15 | 102068658 | A | G | 0.253 | 0.0140873  | 1.44E-06 | 1.40E-12  | Yes | Yes |
| rs12600110  | 16 | 962154    | C | T | 0.375 | -0.0150678 | 1.29E-06 | 3.90E-17  | Yes | No  |
| rs12921195  | 16 | 4677604   | A | C | 0.129 | 0.0170527  | 2.15E-06 | 1.62E-09  | Yes | No  |
| rs12928099  | 16 | 15150505  | A | C | 0.297 | -0.025582  | 1.35E-06 | 2.24E-42  | Yes | No  |
| rs7196161   | 16 | 31110981  | A | G | 0.624 | 0.0149822  | 1.27E-06 | 1.90E-17  | Yes | No  |
| rs62033400  | 16 | 53811788  | G | A | 0.401 | 0.0156307  | 1.25E-06 | 2.08E-19  | Yes | No  |
| rs17231506  | 16 | 56994528  | T | C | 0.320 | -0.0329787 | 1.31E-06 | 4.65E-73  | Yes | No  |
| rs73597575  | 16 | 67677001  | T | C | 0.085 | -0.0174762 | 2.18E-06 | 8.62E-09  | Yes | No  |
| rs6499240   | 16 | 69686912  | G | A | 0.582 | 0.0162186  | 1.27E-06 | 2.87E-20  | Yes | No  |
| rs12445401  | 16 | 72148419  | G | A | 0.192 | 0.0221914  | 1.59E-06 | 3.47E-24  | Yes | No  |
| rs76862947  | 16 | 79746461  | C | T | 0.289 | 0.0120231  | 1.36E-06 | 2.25E-10  | Yes | No  |
| rs2925979   | 16 | 81534790  | C | T | 0.699 | -0.0257081 | 1.33E-06 | 9.10E-44  | Yes | No  |
| rs11641586  | 16 | 85270707  | T | G | 0.198 | -0.013998  | 1.57E-06 | 1.52E-10  | Yes | No  |
| rs8054124   | 16 | 86434553  | C | T | 0.231 | 0.0121188  | 1.46E-06 | 2.52E-09  | Yes | No  |
| rs11870735  | 17 | 481604    | T | C | 0.176 | 0.0133745  | 1.61E-06 | 2.52E-09  | Yes | No  |
| rs11078597  | 17 | 1618363   | C | T | 0.187 | 0.0174414  | 1.59E-06 | 2.71E-15  | Yes | Yes |
| rs79202680  | 17 | 4692640   | T | G | 0.006 | -0.149708  | 8.06E-06 | 3.55E-41  | No  | No  |
| rs571475342 | 17 | 5207882   | G | A | 0.005 | -0.106433  | 9.23E-06 | 2.71E-17  | No  | No  |
| rs200489612 | 17 | 7106378   | A | G | 0.004 | -0.118553  | 1.13E-05 | 7.32E-15  | No  | No  |
| rs9905032   | 17 | 17457768  | A | G | 0.063 | 0.0287209  | 2.53E-06 | 3.14E-16  | Yes | No  |
| rs704       | 17 | 26694861  | A | G | 0.477 | -0.0111031 | 1.23E-06 | 7.48E-11  | Yes | No  |
| rs17767256  | 17 | 28581043  | G | T | 0.337 | -0.0106848 | 1.30E-06 | 3.31E-09  | Yes | No  |
| rs650558    | 17 | 40721042  | T | C | 0.242 | 0.0153589  | 1.44E-06 | 1.47E-14  | Yes | No  |
| rs186398347 | 17 | 41335716  | G | A | 0.005 | 0.0933955  | 9.80E-06 | 4.90E-12  | No  | No  |
| rs72836561  | 17 | 41926126  | T | C | 0.030 | 0.149617   | 3.58E-06 | 2.98E-199 | Yes | No  |
| rs72824773  | 17 | 42626279  | A | G | 0.006 | 0.0739476  | 9.06E-06 | 2.88E-09  | Yes | No  |
| rs7207542   | 17 | 45697549  | G | C | 0.495 | 0.0104051  | 1.27E-06 | 2.10E-09  | No  | No  |
| rs10775406  | 17 | 46197755  | G | A | 0.752 | 0.0151746  | 1.43E-06 | 1.90E-14  | Yes | No  |
| rs28394864  | 17 | 47450775  | A | G | 0.462 | 0.015812   | 1.25E-06 | 5.50E-20  | Yes | No  |
| rs1292072   | 17 | 57925649  | G | A | 0.211 | 0.0164089  | 1.50E-06 | 4.31E-15  | Yes | No  |
| rs1801689   | 17 | 64210580  | C | A | 0.026 | -0.0573699 | 3.80E-06 | 1.83E-27  | Yes | No  |
| rs11656743  | 17 | 65980289  | A | G | 0.788 | -0.0244634 | 1.52E-06 | 2.86E-31  | Yes | No  |
| rs77542162  | 17 | 67081278  | G | A | 0.020 | -0.0487845 | 4.51E-06 | 6.50E-15  | Yes | No  |
| rs717118    | 17 | 68464817  | A | T | 0.506 | -0.0102742 | 1.24E-06 | 2.30E-09  | No  | No  |
| rs3744231   | 17 | 73268801  | T | C | 0.701 | 0.0103018  | 1.36E-06 | 4.76E-08  | Yes | No  |
| rs193220    | 17 | 74268619  | T | C | 0.309 | -0.0117996 | 1.34E-06 | 1.94E-10  | Yes | No  |
| rs7212201   | 17 | 76393896  | A | C | 0.611 | -0.0195429 | 1.25E-06 | 3.17E-29  | Yes | No  |
| rs62078746  | 17 | 80053590  | A | G | 0.553 | -0.0106501 | 1.27E-06 | 1.24E-09  | Yes | No  |
| rs8083730   | 18 | 293519    | A | G | 0.082 | -0.0185654 | 2.22E-06 | 1.73E-09  | No  | No  |
| rs11664106  | 18 | 2846812   | T | A | 0.364 | -0.0108268 | 1.45E-06 | 2.76E-08  | No  | No  |
| rs35321365  | 18 | 19905141  | T | C | 0.516 | -0.0114514 | 1.25E-06 | 3.66E-11  | Yes | No  |
| rs1623060   | 18 | 21143183  | T | C | 0.493 | -0.0145633 | 1.23E-06 | 1.57E-17  | Yes | No  |
| rs150261265 | 18 | 29772887  | C | T | 0.001 | 0.191355   | 2.63E-05 | 1.35E-10  | No  | No  |
| rs143393480 | 18 | 56089858  | T | G | 0.009 | 0.0561342  | 6.53E-06 | 5.86E-10  | No  | No  |
| rs1457489   | 18 | 57861961  | A | G | 0.270 | 0.0132806  | 1.39E-06 | 6.08E-12  | Yes | No  |
| rs12454712  | 18 | 60845884  | C | T | 0.380 | -0.0150757 | 1.33E-06 | 1.55E-16  | No  | No  |
| rs1135908   | 19 | 808742    | T | G | 0.146 | 0.0134369  | 1.80E-06 | 4.95E-08  | Yes | No  |
| rs350885    | 19 | 4147445   | C | A | 0.742 | 0.0168072  | 1.43E-06 | 1.82E-17  | Yes | Yes |
| rs35502362  | 19 | 4966041   | T | C | 0.338 | -0.0151418 | 1.31E-06 | 6.07E-17  | Yes | No  |
| rs4804414   | 19 | 7223785   | T | C | 0.427 | 0.0203605  | 1.24E-06 | 2.42E-32  | Yes | No  |
| rs11672003  | 19 | 7909765   | A | G | 0.276 | 0.0138575  | 1.41E-06 | 1.35E-12  | Yes | No  |
| rs116843064 | 19 | 8429323   | A | G | 0.020 | -0.23635   | 4.40E-06 | 0         | Yes | No  |
| rs555628099 | 19 | 8945880   | G | A | 0.004 | -0.0900764 | 9.63E-06 | 1.29E-11  | No  | No  |
| rs145464906 | 19 | 11350874  | T | C | 0.001 | -0.361925  | 3.47E-05 | 2.22E-19  | No  | No  |
| rs1966500   | 19 | 18735666  | C | T | 0.452 | -0.0122074 | 1.27E-06 | 3.33E-12  | Yes | No  |
| rs58542926  | 19 | 19379549  | T | C | 0.075 | -0.108022  | 2.32E-06 | 6.77E-246 | Yes | No  |
| rs75916629  | 19 | 20213781  | G | A | 0.025 | -0.0565652 | 4.13E-06 | 5.54E-23  | Yes | No  |
| rs7256564   | 19 | 33889593  | G | A | 0.689 | -0.0146903 | 1.33E-06 | 1.37E-15  | Yes | No  |
| rs58895965  | 19 | 35551428  | A | C | 0.165 | 0.0238047  | 1.64E-06 | 2.11E-25  | Yes | No  |

|             |    |          |   |   |       |            |          |           |     |     |
|-------------|----|----------|---|---|-------|------------|----------|-----------|-----|-----|
| rs35538872  | 19 | 41754430 | A | G | 0.006 | -0.0889336 | 8.34E-06 | 1.55E-14  | No  | No  |
| rs141226346 | 19 | 44890969 | G | C | 0.002 | -0.212674  | 1.83E-05 | 6.24E-19  | No  | No  |
| rs483082    | 19 | 45416178 | T | G | 0.229 | 0.0960549  | 1.48E-06 | 0         | Yes | No  |
| rs12459222  | 19 | 46859301 | C | G | 0.301 | -0.0129416 | 1.35E-06 | 4.05E-12  | Yes | No  |
| rs10408163  | 19 | 47597102 | C | T | 0.709 | 0.0118257  | 1.35E-06 | 2.55E-10  | Yes | No  |
| rs62129968  | 19 | 48383542 | A | C | 0.162 | -0.0164856 | 1.69E-06 | 1.52E-12  | Yes | No  |
| rs838133    | 19 | 49259529 | G | A | 0.556 | -0.019842  | 1.35E-06 | 3.98E-27  | No  | No  |
| rs113886122 | 19 | 50044741 | G | C | 0.151 | 0.0198719  | 1.73E-06 | 1.41E-16  | Yes | No  |
| rs798889    | 19 | 54793250 | T | G | 0.220 | -0.0130809 | 1.50E-06 | 3.63E-10  | Yes | No  |
| rs7251733   | 19 | 56099951 | A | G | 0.161 | 0.0209954  | 1.68E-06 | 2.13E-19  | Yes | No  |
| rs8102873   | 19 | 57488423 | T | C | 0.581 | 0.0104809  | 1.24E-06 | 1.27E-09  | Yes | No  |
| rs151235402 | 20 | 569164   | T | C | 0.017 | 0.0475823  | 4.93E-06 | 3.56E-12  | Yes | No  |
| rs6120879   | 20 | 30202961 | C | T | 0.164 | -0.012668  | 1.67E-06 | 4.49E-08  | Yes | No  |
| rs67611724  | 20 | 32308275 | T | C | 0.147 | 0.0155546  | 1.74E-06 | 1.42E-10  | Yes | No  |
| rs78185617  | 20 | 34124603 | C | G | 0.132 | -0.0182643 | 1.84E-06 | 5.41E-13  | Yes | No  |
| rs1883711   | 20 | 39179822 | C | G | 0.032 | 0.0590939  | 3.68E-06 | 7.09E-31  | Yes | No  |
| rs6102322   | 20 | 39872768 | T | C | 0.298 | 0.0157916  | 1.35E-06 | 2.95E-17  | Yes | No  |
| rs6073958   | 20 | 44551855 | C | T | 0.202 | 0.0487116  | 1.52E-06 | 7.47E-117 | Yes | No  |
| rs6066138   | 20 | 45594711 | A | G | 0.274 | -0.0171088 | 1.37E-06 | 3.31E-19  | Yes | No  |
| rs6068174   | 20 | 51046309 | T | C | 0.637 | 0.0112436  | 1.29E-06 | 3.34E-10  | Yes | No  |
| rs6070138   | 20 | 56118558 | A | C | 0.594 | 0.0146908  | 1.28E-06 | 5.72E-17  | Yes | Yes |
| rs8126001   | 20 | 62711459 | T | C | 0.484 | -0.0158162 | 1.43E-06 | 6.08E-18  | Yes | No  |
| rs8134638   | 21 | 40644170 | C | T | 0.384 | 0.0122478  | 1.29E-06 | 6.24E-12  | Yes | No  |
| rs960230    | 21 | 42622479 | G | A | 0.786 | 0.0117786  | 1.51E-06 | 1.88E-08  | Yes | No  |
| rs200559406 | 21 | 46875817 | A | G | 0.001 | 0.23301    | 3.39E-05 | 3.34E-08  | No  | No  |
| rs35665085  | 22 | 17625915 | A | G | 0.056 | 0.0230441  | 2.70E-06 | 8.51E-10  | Yes | No  |
| rs4822458   | 22 | 24265659 | T | C | 0.546 | -0.0110083 | 1.26E-06 | 2.45E-10  | Yes | No  |
| rs4352308   | 22 | 29131788 | T | C | 0.708 | 0.0115682  | 1.36E-06 | 9.30E-10  | Yes | No  |
| rs2530679   | 22 | 30082569 | G | A | 0.548 | 0.0108578  | 1.25E-06 | 4.04E-10  | No  | No  |
| rs9610329   | 22 | 36042986 | T | C | 0.437 | 0.0124373  | 1.30E-06 | 3.94E-12  | No  | No  |
| rs4820325   | 22 | 38599978 | A | G | 0.582 | 0.0209178  | 1.26E-06 | 3.70E-33  | Yes | No  |
| rs4821815   | 22 | 39105707 | A | G | 0.334 | 0.0151832  | 1.30E-06 | 4.60E-17  | Yes | Yes |
| rs3747207   | 22 | 44324855 | A | G | 0.222 | -0.0121357 | 1.47E-06 | 3.01E-09  | Yes | No  |
| rs4253766   | 22 | 46623905 | T | C | 0.107 | 0.0225365  | 1.98E-06 | 2.91E-16  | Yes | Yes |
| rs140947018 | 22 | 50165082 | A | G | 0.029 | -0.0307324 | 3.73E-06 | 3.22E-09  | Yes | No  |
| rs73188911  | 22 | 50746706 | T | C | 0.082 | -0.0182969 | 2.30E-06 | 9.16E-09  | Yes | No  |

53 **Supplemental Table 7. SNPs included in systolic blood pressure-related analyses.**

54

| RSID        | Chrom. | Position  | Effect allele | Other allele | Effect allele freq. | Beta    | SE     | p-value   | Used in MR | Used in MR + Steiger filt. |
|-------------|--------|-----------|---------------|--------------|---------------------|---------|--------|-----------|------------|----------------------------|
| rs2076328   | 1      | 1687482   | T             | G            | 0.4892              | -0.334  | 0.0311 | 7.96E-27  | Yes        | No                         |
| rs260508    | 1      | 2187085   | T             | G            | 0.6151              | 0.1578  | 0.0311 | 3.85E-07  | Yes        | No                         |
| rs2493292   | 1      | 3328659   | T             | C            | 0.1446              | 0.4078  | 0.0438 | 1.35E-20  | Yes        | No                         |
| rs709209    | 1      | 6278414   | A             | G            | 0.6582              | 0.0899  | 0.0329 | 0.006243  | Yes        | No                         |
| rs4908678   | 1      | 7739250   | T             | C            | 0.6253              | -0.1343 | 0.0315 | 1.98E-05  | Yes        | No                         |
| rs2252865   | 1      | 8422676   | T             | C            | 0.3485              | 0.2022  | 0.0317 | 1.75E-10  | Yes        | No                         |
| rs9662255   | 1      | 9441949   | A             | C            | 0.4271              | -0.2291 | 0.031  | 1.40E-13  | Yes        | No                         |
| rs880315    | 1      | 10796866  | T             | C            | 0.6565              | -0.5076 | 0.0323 | 9.59E-56  | Yes        | Yes                        |
| rs17367504  | 1      | 11862778  | A             | G            | 0.8409              | 0.8968  | 0.0413 | 1.58E-104 | Yes        | Yes                        |
| rs3820068   | 1      | 15798197  | A             | G            | 0.8038              | 0.2935  | 0.0387 | 3.31E-14  | Yes        | No                         |
| rs2807337   | 1      | 22577371  | T             | C            | 0.3655              | 0.1864  | 0.0314 | 2.78E-09  | Yes        | Yes                        |
| rs150266910 | 1      | 23442265  | T             | C            | 0.1766              | 0.1152  | 0.0394 | 0.003509  | Yes        | No                         |
| rs6686889   | 1      | 25030470  | T             | C            | 0.2531              | 0.205   | 0.0348 | 3.89E-09  | Yes        | No                         |
| rs79598313  | 1      | 27284913  | T             | C            | 0.0252              | 0.6651  | 0.0996 | 2.40E-11  | Yes        | No                         |
| rs3737801   | 1      | 27960832  | C             | G            | 0.9224              | 0.3886  | 0.0601 | 1.02E-10  | Yes        | No                         |
| rs143167197 | 1      | 28734372  | A             | G            | 0.9286              | -0.4337 | 0.0618 | 2.31E-12  | Yes        | No                         |
| rs1565716   | 1      | 29549216  | A             | G            | 0.0697              | 0.247   | 0.0594 | 3.23E-05  | Yes        | No                         |
| rs4652875   | 1      | 33868469  | C             | G            | 0.4224              | 0.1396  | 0.0305 | 4.81E-06  | No         | No                         |
| rs9729719   | 1      | 38298207  | A             | G            | 0.2932              | 0.1529  | 0.0338 | 5.95E-06  | Yes        | No                         |
| rs11210029  | 1      | 41865293  | A             | G            | 0.6322              | -0.203  | 0.0313 | 8.92E-11  | Yes        | No                         |
| rs7515635   | 1      | 42408070  | T             | C            | 0.4619              | 0.2509  | 0.0303 | 1.25E-16  | Yes        | No                         |
| rs72659998  | 1      | 43037556  | T             | C            | 0.1508              | -0.1811 | 0.0427 | 2.22E-05  | Yes        | No                         |
| rs839755    | 1      | 43856410  | A             | C            | 0.6149              | -0.2665 | 0.0308 | 5.41E-18  | Yes        | No                         |
| rs512083    | 1      | 46027355  | T             | C            | 0.5349              | -0.1111 | 0.0303 | 0.0002425 | Yes        | No                         |
| rs12142296  | 1      | 46541679  | T             | G            | 0.8639              | -0.112  | 0.0442 | 0.01134   | Yes        | No                         |
| rs4926923   | 1      | 48109225  | T             | C            | 0.9114              | 0.3199  | 0.0537 | 2.56E-09  | Yes        | No                         |
| rs11579440  | 1      | 49052423  | T             | C            | 0.8483              | 0.2674  | 0.0425 | 3.24E-10  | Yes        | Yes                        |
| rs147696085 | 1      | 51021867  | A             | G            | 0.094               | -0.0841 | 0.0527 | 0.1103    | Yes        | No                         |
| rs6681713   | 1      | 51527684  | T             | G            | 0.9811              | 0.3175  | 0.1138 | 0.005268  | Yes        | No                         |
| rs112557609 | 1      | 56576924  | A             | G            | 0.3438              | 0.2838  | 0.0319 | 5.87E-19  | Yes        | No                         |
| rs2404715   | 1      | 57008778  | T             | C            | 0.0925              | -0.305  | 0.0523 | 5.49E-09  | Yes        | No                         |
| rs60199046  | 1      | 59663341  | A             | G            | 0.711               | 0.2722  | 0.0332 | 2.41E-16  | Yes        | No                         |
| rs20354     | 1      | 67071356  | T             | G            | 0.1335              | 0.2014  | 0.0442 | 5.31E-06  | Yes        | No                         |
| rs34517439  | 1      | 78450517  | A             | C            | 0.1191              | -0.2446 | 0.049  | 5.95E-07  | No         | No                         |
| rs12034319  | 1      | 86040107  | A             | G            | 0.2197              | 0.1267  | 0.0365 | 0.000519  | Yes        | No                         |
| rs385437    | 1      | 86822231  | A             | G            | 0.8598              | 0.1831  | 0.0438 | 2.89E-05  | Yes        | No                         |
| rs10923038  | 1      | 88651771  | A             | C            | 0.6179              | 0.2008  | 0.0313 | 1.36E-10  | Yes        | Yes                        |
| rs10922502  | 1      | 89360158  | A             | G            | 0.628               | -0.2863 | 0.0313 | 6.14E-20  | Yes        | No                         |
| rs2065152   | 1      | 90228519  | T             | C            | 0.3574              | 0.155   | 0.0314 | 8.12E-07  | Yes        | No                         |
| rs17516329  | 1      | 92319781  | A             | T            | 0.6855              | 0.0971  | 0.0327 | 0.002961  | Yes        | No                         |
| rs7514579   | 1      | 94051350  | A             | C            | 0.7712              | 0.2243  | 0.0361 | 5.45E-10  | Yes        | No                         |
| rs17396055  | 1      | 94730954  | A             | G            | 0.3317              | -0.1762 | 0.0321 | 3.96E-08  | Yes        | No                         |
| rs17030613  | 1      | 113190807 | A             | C            | 0.7898              | -0.4053 | 0.0371 | 8.36E-28  | Yes        | No                         |
| rs2932538   | 1      | 113216543 | A             | G            | 0.2569              | -0.3389 | 0.0345 | 8.48E-23  | Yes        | No                         |
| rs12078697  | 1      | 117015118 | C             | G            | 0.2113              | -0.1462 | 0.0371 | 8.06E-05  | Yes        | No                         |
| rs7553422   | 1      | 119540719 | T             | C            | 0.4117              | -0.1007 | 0.0306 | 0.001004  | Yes        | No                         |
| rs72704264  | 1      | 145713305 | C             | G            | 0.2163              | 0.0926  | 0.0372 | 0.01273   | Yes        | No                         |
| rs11585169  | 1      | 150572037 | A             | T            | 0.5773              | 0.1796  | 0.0308 | 5.34E-09  | No         | No                         |
| rs13796     | 1      | 154245917 | T             | C            | 0.8643              | -0.053  | 0.0449 | 0.2377    | Yes        | No                         |
| rs76719272  | 1      | 156129796 | T             | C            | 0.1312              | -0.2738 | 0.0461 | 2.97E-09  | Yes        | No                         |
| rs2171690   | 1      | 164740099 | T             | C            | 0.5352              | 0.1527  | 0.0303 | 4.76E-07  | Yes        | No                         |
| rs7524019   | 1      | 167367193 | T             | C            | 0.4909              | 0.1308  | 0.0303 | 1.60E-05  | Yes        | No                         |
| rs2157597   | 1      | 169201567 | T             | C            | 0.3546              | -0.1432 | 0.0317 | 6.18E-06  | Yes        | No                         |
| rs12405515  | 1      | 172357441 | T             | G            | 0.5709              | -0.1411 | 0.0304 | 3.33E-06  | Yes        | No                         |
| rs12118102  | 1      | 176634724 | A             | G            | 0.947               | 0.1916  | 0.0676 | 0.004579  | Yes        | No                         |
| rs150816167 | 1      | 179571862 | T             | C            | 0.955               | -0.2367 | 0.0782 | 0.002465  | Yes        | No                         |
| rs10913934  | 1      | 180131640 | T             | G            | 0.5929              | 0.1021  | 0.0307 | 0.0008957 | Yes        | No                         |
| rs1043069   | 1      | 180859368 | T             | G            | 0.6156              | 0.234   | 0.0311 | 5.26E-14  | Yes        | Yes                        |
| rs41475048  | 1      | 183058452 | A             | G            | 0.745               | -0.1233 | 0.0352 | 0.0004657 | Yes        | No                         |
| rs4651224   | 1      | 184585182 | T             | C            | 0.4474              | 0.1986  | 0.0306 | 9.00E-11  | Yes        | No                         |
| rs12042924  | 1      | 197297417 | T             | C            | 0.5284              | -0.1807 | 0.0303 | 2.62E-09  | Yes        | No                         |
| rs882624    | 1      | 201735913 | T             | C            | 0.332               | -0.0178 | 0.0324 | 0.5825    | No         | No                         |
| rs33996239  | 1      | 203109801 | T             | C            | 0.0601              | -0.3655 | 0.0662 | 3.39E-08  | Yes        | No                         |
| rs4245739   | 1      | 204518842 | A             | C            | 0.7284              | 0.0949  | 0.034  | 0.005305  | Yes        | No                         |

|             |   |           |   |   |        |         |        |           |     |     |
|-------------|---|-----------|---|---|--------|---------|--------|-----------|-----|-----|
| rs2629665   | 1 | 207220800 | A | C | 0.4101 | -0.1795 | 0.0309 | 6.03E-09  | Yes | No  |
| rs2761436   | 1 | 207919748 | T | C | 0.5368 | 0.1839  | 0.0302 | 1.15E-09  | Yes | No  |
| rs7555285   | 1 | 209970355 | C | G | 0.8011 | 0.2294  | 0.0376 | 1.05E-09  | Yes | No  |
| rs12408022  | 1 | 217718789 | T | C | 0.2587 | 0.1939  | 0.0347 | 2.41E-08  | Yes | No  |
| rs35981664  | 1 | 218549354 | A | T | 0.6879 | -0.1561 | 0.033  | 2.27E-06  | Yes | No  |
| rs2820443   | 1 | 219753509 | T | C | 0.7089 | 0.1596  | 0.0331 | 1.40E-06  | Yes | No  |
| rs9431431   | 1 | 221358796 | A | G | 0.294  | -0.2107 | 0.0331 | 1.97E-10  | Yes | No  |
| rs73091767  | 1 | 227250775 | T | C | 0.7343 | -0.179  | 0.0339 | 1.35E-07  | Yes | No  |
| rs2004776   | 1 | 230848702 | T | C | 0.2397 | 0.3789  | 0.0354 | 8.37E-27  | Yes | No  |
| rs6429422   | 1 | 243472801 | T | G | 0.6769 | -0.1532 | 0.0323 | 2.10E-06  | Yes | No  |
| rs4926499   | 1 | 249155909 | C | G | 0.8263 | 0.2965  | 0.0438 | 1.33E-11  | No  | No  |
| rs4850047   | 2 | 3634753   | T | C | 0.1468 | -0.132  | 0.0446 | 0.003067  | Yes | No  |
| rs2175337   | 2 | 9298590   | A | C | 0.6104 | 0.146   | 0.031  | 2.53E-06  | Yes | No  |
| rs67720684  | 2 | 18975439  | A | C | 0.2385 | 0.1943  | 0.0353 | 3.85E-08  | Yes | No  |
| rs1344653   | 2 | 19730845  | A | G | 0.499  | -0.2534 | 0.03   | 3.09E-17  | Yes | No  |
| rs7255      | 2 | 20878820  | T | C | 0.454  | -0.1518 | 0.0305 | 6.42E-07  | Yes | No  |
| rs66774912  | 2 | 21423532  | A | G | 0.1371 | -0.1645 | 0.0441 | 0.0001928 | Yes | No  |
| rs10779936  | 2 | 23950200  | A | G | 0.7129 | -0.1413 | 0.0332 | 2.15E-05  | Yes | No  |
| rs55701159  | 2 | 25139596  | T | G | 0.8867 | 0.3959  | 0.0481 | 1.73E-16  | Yes | No  |
| rs1275988   | 2 | 26914364  | T | C | 0.6112 | -0.541  | 0.0308 | 4.42E-69  | Yes | Yes |
| rs9678851   | 2 | 27887034  | A | C | 0.5675 | -0.1722 | 0.0307 | 1.99E-08  | Yes | No  |
| rs7562      | 2 | 28635740  | T | C | 0.5207 | 0.2313  | 0.0305 | 3.26E-14  | Yes | Yes |
| rs1607644   | 2 | 34679626  | A | G | 0.3664 | -0.1274 | 0.0313 | 4.61E-05  | Yes | No  |
| rs13420463  | 2 | 37517566  | A | G | 0.7734 | 0.3143  | 0.036  | 2.72E-18  | Yes | No  |
| rs2707238   | 2 | 38094149  | C | G | 0.284  | 0.0927  | 0.0335 | 0.005663  | Yes | No  |
| rs4952611   | 2 | 40567743  | T | C | 0.5795 | -0.211  | 0.0315 | 1.97E-11  | Yes | No  |
| rs11681462  | 2 | 42352567  | A | C | 0.7891 | -0.1776 | 0.0374 | 2.00E-06  | Yes | No  |
| rs76326501  | 2 | 43167878  | A | C | 0.9092 | 0.5681  | 0.0533 | 1.63E-26  | Yes | No  |
| rs35590893  | 2 | 43716933  | A | G | 0.2773 | -0.2374 | 0.0336 | 1.66E-12  | Yes | No  |
| rs11690961  | 2 | 46363336  | A | C | 0.8833 | 0.1388  | 0.047  | 0.003158  | Yes | No  |
| rs6545155   | 2 | 50429861  | T | C | 0.7817 | 0.1821  | 0.0364 | 5.78E-07  | Yes | Yes |
| rs10189186  | 2 | 53025757  | A | G | 0.53   | 0.1893  | 0.0302 | 3.91E-10  | Yes | No  |
| rs2920899   | 2 | 55279681  | T | G | 0.7864 | 0.1986  | 0.0372 | 9.45E-08  | Yes | No  |
| rs1975487   | 2 | 55809054  | A | G | 0.4812 | -0.1986 | 0.0307 | 9.62E-11  | Yes | No  |
| rs6730325   | 2 | 59315828  | A | G | 0.6053 | -0.1268 | 0.0308 | 3.81E-05  | Yes | No  |
| rs72816333  | 2 | 60096560  | A | T | 0.8298 | 0.2336  | 0.04   | 5.45E-09  | Yes | No  |
| rs925484    | 2 | 60611437  | C | G | 0.5998 | -0.1696 | 0.0308 | 3.66E-08  | Yes | No  |
| rs7608483   | 2 | 61836235  | A | C | 0.4176 | 0.1383  | 0.0307 | 6.56E-06  | Yes | No  |
| rs13014371  | 2 | 64217786  | T | C | 0.5705 | -0.1709 | 0.0305 | 1.99E-08  | Yes | No  |
| rs2631669   | 2 | 66104881  | T | C | 0.471  | 0.0429  | 0.0302 | 0.1558    | Yes | No  |
| rs2300481   | 2 | 66782467  | T | C | 0.3865 | 0.1981  | 0.031  | 1.56E-10  | Yes | Yes |
| rs6731373   | 2 | 68503044  | A | G | 0.3492 | 0.1913  | 0.0326 | 4.18E-09  | Yes | No  |
| rs12052761  | 2 | 69065841  | A | G | 0.3936 | -0.1336 | 0.031  | 1.60E-05  | Yes | No  |
| rs3771371   | 2 | 71627539  | T | C | 0.5692 | -0.1489 | 0.0304 | 9.72E-07  | Yes | No  |
| rs10193543  | 2 | 72483329  | T | G | 0.8367 | 0.2023  | 0.0407 | 6.73E-07  | Yes | No  |
| rs1876487   | 2 | 73114352  | A | C | 0.2939 | -0.1277 | 0.0342 | 0.000191  | Yes | No  |
| rs11689667  | 2 | 85491365  | T | C | 0.5447 | 0.1983  | 0.0304 | 6.66E-11  | Yes | No  |
| rs72847885  | 2 | 86326717  | A | G | 0.663  | 0.2413  | 0.0318 | 3.08E-14  | Yes | No  |
| rs2579519   | 2 | 96675166  | T | C | 0.6161 | -0.0094 | 0.0314 | 0.7639    | Yes | No  |
| rs4851462   | 2 | 98357163  | T | C | 0.6236 | -0.0706 | 0.0317 | 0.02578   | No  | No  |
| rs150194832 | 2 | 106126880 | C | G | 0.0934 | -0.2901 | 0.0523 | 2.88E-08  | Yes | No  |
| rs28377357  | 2 | 112769721 | A | G | 0.2938 | -0.2142 | 0.0331 | 9.60E-11  | No  | No  |
| rs62158170  | 2 | 114082175 | A | G | 0.7834 | 0.2369  | 0.0368 | 1.21E-10  | Yes | No  |
| rs10864859  | 2 | 121440218 | T | G | 0.9155 | 0.3089  | 0.0567 | 5.07E-08  | Yes | No  |
| rs6723509   | 2 | 122000745 | T | C | 0.8609 | 0.2531  | 0.0438 | 7.61E-09  | Yes | No  |
| rs13001283  | 2 | 127183454 | A | G | 0.1595 | 0.1816  | 0.0417 | 1.32E-05  | Yes | No  |
| rs4954192   | 2 | 135632981 | T | C | 0.391  | -0.1796 | 0.0312 | 8.62E-09  | Yes | No  |
| rs72844590  | 2 | 138421227 | T | G | 0.1497 | 0.2173  | 0.0432 | 4.95E-07  | Yes | No  |
| rs7606205   | 2 | 144146311 | A | C | 0.7023 | -0.1843 | 0.0333 | 3.06E-08  | Yes | No  |
| rs1438896   | 2 | 145646072 | T | C | 0.2982 | 0.208   | 0.0329 | 2.48E-10  | Yes | No  |
| rs34570306  | 2 | 146272860 | T | C | 0.5278 | -0.1515 | 0.0309 | 9.08E-07  | Yes | No  |
| rs62169544  | 2 | 146950908 | A | G | 0.4421 | -0.1885 | 0.0305 | 6.21E-10  | Yes | No  |
| rs12990959  | 2 | 148572160 | T | C | 0.6866 | -0.097  | 0.0326 | 0.002953  | Yes | No  |
| rs4664080   | 2 | 152978341 | A | G | 0.3975 | -0.1451 | 0.0308 | 2.44E-06  | Yes | No  |
| rs3175      | 2 | 153618773 | A | G | 0.6519 | 0.16    | 0.0324 | 7.70E-07  | Yes | No  |
| rs1220128   | 2 | 158499902 | C | G | 0.8519 | 0.2034  | 0.0429 | 2.12E-06  | Yes | No  |
| rs79523138  | 2 | 161368213 | A | G | 0.8807 | -0.2469 | 0.0474 | 1.85E-07  | Yes | No  |
| rs55732192  | 2 | 162278233 | T | G | 0.0947 | -0.3358 | 0.0521 | 1.15E-10  | Yes | No  |
| rs1446468   | 2 | 164963486 | T | C | 0.4538 | -0.5063 | 0.0304 | 4.38E-62  | Yes | Yes |
| rs6712203   | 2 | 165557318 | T | C | 0.3723 | -0.2092 | 0.0313 | 2.41E-11  | Yes | No  |
| rs2390258   | 2 | 166250129 | A | G | 0.3074 | -0.1309 | 0.0328 | 6.55E-05  | Yes | No  |
| rs560887    | 2 | 169763148 | T | C | 0.299  | -0.1572 | 0.0329 | 1.79E-06  | Yes | No  |



|             |   |           |   |   |        |         |        |           |     |     |
|-------------|---|-----------|---|---|--------|---------|--------|-----------|-----|-----|
| rs151054210 | 2 | 172381487 | A | G | 0.1825 | 0.1823  | 0.039  | 3.00E-06  | Yes | No  |
| rs6758859   | 2 | 173965056 | T | C | 0.6357 | 0.0898  | 0.0313 | 0.0041    | Yes | No  |
| rs11694601  | 2 | 174949358 | A | G | 0.5968 | -0.1909 | 0.0309 | 6.41E-10  | Yes | No  |
| rs72914576  | 2 | 175529967 | C | G | 0.8099 | -0.292  | 0.0388 | 5.38E-14  | Yes | No  |
| rs60148403  | 2 | 177989414 | A | T | 0.1955 | -0.2043 | 0.0385 | 1.12E-07  | Yes | No  |
| rs1837164   | 2 | 178716601 | A | T | 0.3697 | 0.1824  | 0.0311 | 4.66E-09  | Yes | Yes |
| rs79146658  | 2 | 179786068 | T | C | 0.9147 | -0.074  | 0.0545 | 0.1742    | Yes | No  |
| rs1486236   | 2 | 180739450 | A | C | 0.3702 | -0.2339 | 0.0321 | 2.96E-13  | Yes | Yes |
| rs10184839  | 2 | 181946115 | A | T | 0.2914 | -0.1853 | 0.0332 | 2.40E-08  | Yes | No  |
| rs16823124  | 2 | 183224127 | A | G | 0.3066 | 0.236   | 0.0326 | 4.59E-13  | Yes | No  |
| rs12473688  | 2 | 185033470 | A | G | 0.2844 | 0.1805  | 0.0334 | 6.47E-08  | Yes | No  |
| rs28558491  | 2 | 187816321 | T | C | 0.7336 | -0.2114 | 0.0343 | 7.54E-10  | Yes | No  |
| rs11901929  | 2 | 189643316 | A | G | 0.3462 | 0.0908  | 0.0318 | 0.004324  | Yes | No  |
| rs7592578   | 2 | 191439591 | T | G | 0.1947 | -0.2857 | 0.0391 | 2.79E-13  | Yes | No  |
| rs296797    | 2 | 201102905 | T | C | 0.405  | 0.2161  | 0.0308 | 2.16E-12  | Yes | Yes |
| rs1469760   | 2 | 204125426 | T | C | 0.5835 | -0.2485 | 0.0307 | 5.87E-16  | Yes | No  |
| rs2162003   | 2 | 205077128 | T | C | 0.6042 | 0.1985  | 0.0321 | 6.21E-10  | No  | No  |
| rs1263671   | 2 | 207996447 | T | C | 0.8367 | -0.1298 | 0.0415 | 0.001754  | Yes | No  |
| rs55780018  | 2 | 208526140 | T | C | 0.5434 | -0.2784 | 0.031  | 2.73E-19  | Yes | No  |
| rs1047891   | 2 | 211540507 | A | C | 0.3193 | -0.2528 | 0.0328 | 1.37E-14  | Yes | No  |
| rs12694277  | 2 | 213188795 | T | C | 0.2946 | -0.2018 | 0.0335 | 1.80E-09  | Yes | No  |
| rs4674114   | 2 | 217659266 | A | G | 0.2006 | -0.1773 | 0.0377 | 2.53E-06  | Yes | No  |
| rs1063281   | 2 | 218668732 | T | C | 0.6031 | -0.2585 | 0.0313 | 1.40E-16  | Yes | No  |
| rs1996992   | 2 | 219651349 | T | G | 0.0514 | -0.1248 | 0.0687 | 0.06902   | Yes | No  |
| rs12474050  | 2 | 220362557 | T | C | 0.3433 | 0.0647  | 0.0318 | 0.04184   | Yes | No  |
| rs2972146   | 2 | 227100698 | T | G | 0.6425 | 0.2532  | 0.0313 | 6.53E-16  | Yes | No  |
| rs1044822   | 2 | 230629138 | T | C | 0.1482 | -0.248  | 0.0424 | 5.16E-09  | Yes | No  |
| rs12052878  | 2 | 238227594 | A | G | 0.32   | -0.1163 | 0.0324 | 0.0003356 | Yes | No  |
| rs4507125   | 2 | 239864732 | A | C | 0.7858 | -0.121  | 0.0368 | 0.0009911 | Yes | No  |
| rs139354822 | 2 | 242344695 | T | C | 0.9704 | 0.6115  | 0.0975 | 3.51E-10  | Yes | No  |
| rs9865843   | 3 | 7489993   | A | G | 0.518  | -0.1368 | 0.0308 | 8.82E-06  | Yes | No  |
| rs347591    | 3 | 11290122  | T | G | 0.6625 | 0.3181  | 0.032  | 2.87E-23  | Yes | Yes |
| rs729639    | 3 | 13826854  | T | C | 0.3453 | -0.113  | 0.0319 | 0.0003941 | Yes | No  |
| rs11128722  | 3 | 14958126  | A | G | 0.5696 | -0.2865 | 0.0309 | 1.93E-20  | Yes | No  |
| rs189267552 | 3 | 20073193  | A | T | 0.0132 | -0.8664 | 0.139  | 4.55E-10  | Yes | No  |
| rs4634143   | 3 | 23163749  | T | C | 0.3002 | 0.1482  | 0.0329 | 6.79E-06  | Yes | No  |
| rs13082711  | 3 | 27537909  | T | C | 0.7617 | -0.3087 | 0.0354 | 2.78E-18  | Yes | No  |
| rs72851229  | 3 | 29374219  | C | G | 0.1746 | -0.1793 | 0.0403 | 8.79E-06  | Yes | No  |
| rs12638085  | 3 | 30405936  | A | T | 0.3559 | 0.2189  | 0.0318 | 5.61E-12  | Yes | Yes |
| rs4678915   | 3 | 36964583  | A | G | 0.4315 | -0.1377 | 0.0311 | 9.44E-06  | Yes | No  |
| rs267517    | 3 | 37539090  | A | G | 0.5916 | -0.261  | 0.0313 | 7.18E-17  | Yes | No  |
| rs6801957   | 3 | 38767315  | T | C | 0.4101 | 0.0868  | 0.0306 | 0.004561  | Yes | No  |
| rs6788984   | 3 | 41107173  | A | G | 0.8563 | 0.2999  | 0.0432 | 3.81E-12  | Yes | Yes |
| rs9815354   | 3 | 41912651  | A | G | 0.1641 | -0.2166 | 0.0413 | 1.52E-07  | Yes | No  |
| rs141979279 | 3 | 44858131  | T | C | 0.9509 | 0.2883  | 0.0699 | 3.75E-05  | Yes | No  |
| rs113134141 | 3 | 46861939  | A | G | 0.8983 | -0.2732 | 0.0504 | 5.75E-08  | Yes | No  |
| rs6797587   | 3 | 48197614  | A | G | 0.3279 | -0.3271 | 0.0322 | 3.40E-24  | Yes | No  |
| rs73082337  | 3 | 49009570  | C | G | 0.8791 | 0.2795  | 0.0481 | 6.40E-09  | Yes | No  |
| rs36022378  | 3 | 49913705  | T | C | 0.8004 | -0.1925 | 0.0383 | 4.99E-07  | Yes | No  |
| rs13303     | 3 | 52558008  | T | C | 0.4365 | -0.0957 | 0.0307 | 0.001803  | Yes | No  |
| rs9810888   | 3 | 53635595  | T | G | 0.4984 | -0.172  | 0.0304 | 1.60E-08  | Yes | No  |
| rs9827472   | 3 | 56726646  | T | C | 0.3635 | -0.169  | 0.0315 | 8.10E-08  | No  | No  |
| rs12486605  | 3 | 57706503  | T | C | 0.5726 | -0.0832 | 0.0307 | 0.006754  | Yes | No  |
| rs3774702   | 3 | 63856870  | A | G | 0.1766 | 0.0514  | 0.0398 | 0.197     | Yes | No  |
| rs918466    | 3 | 64710253  | A | G | 0.4096 | -0.067  | 0.0309 | 0.03036   | Yes | No  |
| rs7630745   | 3 | 66427029  | T | C | 0.6588 | 0.1692  | 0.0317 | 9.36E-08  | Yes | No  |
| rs4499560   | 3 | 70920485  | A | T | 0.3171 | -0.2199 | 0.0326 | 1.46E-11  | Yes | No  |
| rs729448    | 3 | 73260545  | A | G | 0.5472 | -0.1213 | 0.0304 | 6.62E-05  | Yes | No  |
| rs9857362   | 3 | 74710462  | A | C | 0.5291 | 0.1727  | 0.0306 | 1.62E-08  | Yes | No  |
| rs1375564   | 3 | 85656311  | T | C | 0.6395 | 0.2579  | 0.0315 | 2.84E-16  | Yes | No  |
| rs9860290   | 3 | 99839106  | A | G | 0.2093 | -0.1386 | 0.0371 | 0.0001862 | Yes | No  |
| rs11923667  | 3 | 101268080 | A | T | 0.407  | 0.0914  | 0.0309 | 0.003052  | No  | No  |
| rs28675079  | 3 | 111500002 | A | G | 0.1876 | -0.1762 | 0.0387 | 5.32E-06  | Yes | No  |
| rs1882289   | 3 | 114461208 | A | G | 0.8846 | -0.2089 | 0.0471 | 9.25E-06  | Yes | No  |
| rs6806529   | 3 | 123049938 | A | C | 0.4338 | 0.1768  | 0.0309 | 1.03E-08  | Yes | No  |
| rs6438857   | 3 | 124557643 | T | C | 0.5774 | 0.2736  | 0.0305 | 3.13E-19  | Yes | No  |
| rs62270945  | 3 | 128201889 | T | C | 0.0289 | 0.4362  | 0.096  | 5.51E-06  | Yes | No  |
| rs9875380   | 3 | 132780356 | T | C | 0.4638 | -0.1752 | 0.0302 | 6.53E-09  | Yes | No  |
| rs6783086   | 3 | 133959552 | T | C | 0.3954 | 0.3048  | 0.0308 | 5.13E-23  | Yes | No  |
| rs590198    | 3 | 135953729 | A | G | 0.5286 | 0.1871  | 0.0301 | 5.11E-10  | Yes | No  |
| rs2306374   | 3 | 138119952 | T | C | 0.838  | -0.2825 | 0.0411 | 6.11E-12  | Yes | No  |
| rs16851397  | 3 | 141134818 | A | G | 0.953  | -0.5294 | 0.0726 | 2.96E-13  | Yes | No  |

|             |   |           |   |   |        |         |        |           |     |     |
|-------------|---|-----------|---|---|--------|---------|--------|-----------|-----|-----|
| rs62278541  | 3 | 142631909 | A | G | 0.6473 | 0.137   | 0.0316 | 1.43E-05  | Yes | No  |
| rs6772704   | 3 | 149524692 | A | C | 0.6842 | -0.1237 | 0.0325 | 0.0001394 | Yes | No  |
| rs73158427  | 3 | 153721493 | A | T | 0.1618 | 0.2804  | 0.0409 | 7.24E-12  | Yes | No  |
| rs143112823 | 3 | 154707967 | A | G | 0.0876 | -0.4171 | 0.0557 | 7.16E-14  | Yes | No  |
| rs9833313   | 3 | 157576791 | A | T | 0.2418 | -0.1907 | 0.0356 | 8.43E-08  | Yes | Yes |
| rs78151625  | 3 | 158316726 | T | C | 0.8344 | -0.2453 | 0.0407 | 1.61E-09  | Yes | No  |
| rs419076    | 3 | 169100886 | T | C | 0.4732 | 0.4049  | 0.0301 | 3.00E-41  | Yes | No  |
| rs4894535   | 3 | 171995605 | T | C | 0.1601 | 0.1883  | 0.0414 | 5.42E-06  | Yes | No  |
| rs73171158  | 3 | 176927949 | T | C | 0.4672 | -0.1763 | 0.032  | 3.51E-08  | No  | No  |
| rs7611674   | 3 | 179169230 | T | G | 0.803  | 0.1184  | 0.0389 | 0.002348  | Yes | No  |
| rs262986    | 3 | 183435713 | A | G | 0.4704 | -0.2371 | 0.0305 | 7.67E-15  | Yes | No  |
| rs12374077  | 3 | 185317674 | C | G | 0.3443 | 0.2143  | 0.0317 | 1.48E-11  | Yes | No  |
| rs1706003   | 3 | 194299967 | T | G | 0.4682 | 0.0276  | 0.0315 | 0.3807    | No  | No  |
| rs6777317   | 3 | 197070959 | A | G | 0.2911 | 0.1843  | 0.034  | 5.86E-08  | No  | No  |
| rs1250129   | 4 | 1254930   | A | G | 0.1149 | -0.2057 | 0.0474 | 1.46E-05  | Yes | No  |
| rs55829085  | 4 | 2165493   | A | C | 0.9546 | -0.4309 | 0.074  | 5.73E-09  | Yes | No  |
| rs231708    | 4 | 2694773   | C | G | 0.6921 | -0.2824 | 0.0326 | 4.74E-18  | Yes | No  |
| rs2498323   | 4 | 3451109   | A | G | 0.098  | 0.3171  | 0.0517 | 8.52E-10  | Yes | No  |
| rs3822239   | 4 | 10095539  | A | T | 0.6971 | 0.1473  | 0.0328 | 7.04E-06  | Yes | No  |
| rs13122790  | 4 | 15356795  | A | G | 0.7316 | 0.1161  | 0.0341 | 0.0006688 | Yes | No  |
| rs11730129  | 4 | 16032948  | T | C | 0.2183 | -0.0824 | 0.0367 | 0.02474   | Yes | No  |
| rs2610990   | 4 | 18008232  | A | G | 0.2641 | -0.2903 | 0.0343 | 2.86E-17  | Yes | No  |
| rs28667801  | 4 | 26785356  | A | T | 0.5923 | -0.2627 | 0.0314 | 5.80E-17  | No  | No  |
| rs1878825   | 4 | 36091370  | C | G | 0.6416 | -0.1215 | 0.0319 | 0.0001366 | Yes | No  |
| rs2291435   | 4 | 38387395  | T | C | 0.5335 | -0.262  | 0.0303 | 5.31E-18  | Yes | Yes |
| rs12511987  | 4 | 46595623  | T | G | 0.8226 | -0.2329 | 0.0399 | 5.39E-09  | Yes | No  |
| rs871606    | 4 | 54799245  | T | C | 0.895  | 0.3705  | 0.0495 | 7.25E-14  | Yes | No  |
| rs1718845   | 4 | 57943153  | A | G | 0.2978 | -0.0938 | 0.0331 | 0.00457   | Yes | No  |
| rs6551716   | 4 | 63575696  | A | T | 0.856  | 0.2137  | 0.0438 | 1.05E-06  | Yes | No  |
| rs10008637  | 4 | 77414144  | T | C | 0.5405 | 0.2157  | 0.0302 | 9.24E-13  | Yes | No  |
| rs1458038   | 4 | 81164723  | T | C | 0.294  | 0.8233  | 0.0333 | 3.82E-135 | Yes | No  |
| rs6823199   | 4 | 83925895  | T | C | 0.7438 | 0.2094  | 0.0348 | 1.72E-09  | Yes | No  |
| rs2014912   | 4 | 86715670  | T | C | 0.1528 | 0.4772  | 0.042  | 6.97E-30  | Yes | Yes |
| rs13149209  | 4 | 89750668  | T | C | 0.7773 | 0.281   | 0.0367 | 1.97E-14  | Yes | No  |
| rs7694000   | 4 | 95324968  | A | T | 0.5394 | -0.0636 | 0.0305 | 0.0368    | No  | No  |
| rs1347345   | 4 | 95938386  | A | G | 0.6179 | -0.1806 | 0.0312 | 6.92E-09  | Yes | Yes |
| rs17248480  | 4 | 102435265 | A | G | 0.0283 | -0.8442 | 0.0966 | 2.37E-18  | Yes | No  |
| rs13107325  | 4 | 103188709 | T | C | 0.0739 | -0.9086 | 0.0592 | 4.22E-53  | Yes | No  |
| rs223361    | 4 | 103769304 | T | C | 0.6651 | 0.0477  | 0.0321 | 0.1368    | Yes | No  |
| rs4699165   | 4 | 106109381 | A | G | 0.3565 | 0.1069  | 0.0315 | 0.0006875 | Yes | No  |
| rs13112725  | 4 | 106911742 | C | G | 0.7631 | 0.4137  | 0.0358 | 6.81E-31  | Yes | No  |
| rs7694643   | 4 | 109017528 | A | G | 0.6455 | -0.1953 | 0.0315 | 5.77E-10  | Yes | No  |
| rs6825911   | 4 | 111381638 | T | C | 0.7915 | -0.3066 | 0.0375 | 3.05E-16  | Yes | No  |
| rs4834735   | 4 | 119958809 | T | C | 0.1366 | 0.1843  | 0.0443 | 3.16E-05  | Yes | No  |
| rs66887589  | 4 | 120509279 | T | C | 0.5216 | -0.1951 | 0.0303 | 1.20E-10  | Yes | No  |
| rs3097937   | 4 | 124794644 | A | T | 0.8026 | 0.2226  | 0.0381 | 4.95E-09  | Yes | No  |
| rs7439567   | 4 | 138464842 | T | C | 0.4106 | 0.2537  | 0.0309 | 2.31E-16  | Yes | Yes |
| rs72719160  | 4 | 144051276 | A | T | 0.6829 | -0.2243 | 0.0324 | 4.34E-12  | Yes | No  |
| rs4292285   | 4 | 145271954 | A | T | 0.402  | -0.1397 | 0.0308 | 5.63E-06  | Yes | No  |
| rs4835266   | 4 | 146821725 | T | C | 0.5217 | 0.2155  | 0.0309 | 3.07E-12  | Yes | No  |
| rs10305838  | 4 | 148400256 | T | C | 0.8592 | -0.2659 | 0.0433 | 7.94E-10  | Yes | No  |
| rs6823767   | 4 | 151295085 | T | C | 0.7226 | -0.2129 | 0.0341 | 4.40E-10  | Yes | No  |
| rs13139571  | 4 | 156645513 | A | C | 0.2366 | -0.3299 | 0.0355 | 1.33E-20  | Yes | No  |
| rs17035181  | 4 | 157678511 | T | G | 0.8552 | 0.3074  | 0.0429 | 7.61E-13  | Yes | No  |
| rs869396    | 4 | 169688000 | A | C | 0.4659 | -0.2115 | 0.0305 | 4.12E-12  | Yes | No  |
| rs4957026   | 5 | 361148    | A | G | 0.3399 | 0.1982  | 0.0323 | 8.12E-10  | Yes | No  |
| rs10069690  | 5 | 1279790   | T | C | 0.2582 | 0.3098  | 0.0369 | 4.47E-17  | Yes | Yes |
| rs954767    | 5 | 3706050   | A | C | 0.7413 | -0.2127 | 0.0346 | 7.53E-10  | Yes | No  |
| rs1173771   | 5 | 32815028  | A | G | 0.3987 | -0.6321 | 0.0307 | 5.92E-94  | Yes | Yes |
| rs74774746  | 5 | 33411769  | C | G | 0.2609 | -0.1902 | 0.035  | 5.60E-08  | Yes | No  |
| rs7710854   | 5 | 43824677  | A | G | 0.8834 | 0.2244  | 0.0479 | 2.76E-06  | Yes | No  |
| rs6867399   | 5 | 52135543  | A | C | 0.2671 | 0.1576  | 0.0357 | 1.02E-05  | Yes | No  |
| rs1694068   | 5 | 53283630  | A | T | 0.6139 | 0.2657  | 0.0311 | 1.18E-17  | Yes | No  |
| rs13179413  | 5 | 55868097  | T | C | 0.2819 | 0.2238  | 0.0347 | 1.08E-10  | Yes | No  |
| rs12515541  | 5 | 57095011  | T | G | 0.6081 | 0.1582  | 0.0308 | 2.89E-07  | Yes | No  |
| rs1848510   | 5 | 57754005  | A | G | 0.3621 | 0.1839  | 0.0316 | 5.72E-09  | Yes | No  |
| rs10062049  | 5 | 61553881  | T | C | 0.1358 | 0.2732  | 0.0445 | 8.02E-10  | Yes | No  |
| rs6875372   | 5 | 64079015  | A | T | 0.5151 | 0.1886  | 0.0303 | 4.80E-10  | No  | No  |
| rs3121685   | 5 | 65662133  | T | C | 0.4838 | -0.1563 | 0.0302 | 2.28E-07  | Yes | Yes |
| rs4286632   | 5 | 66291370  | A | G | 0.7306 | 0.211   | 0.0343 | 7.64E-10  | Yes | No  |
| rs246973    | 5 | 68007803  | T | C | 0.2882 | 0.2479  | 0.0335 | 1.45E-13  | Yes | Yes |
| rs72761109  | 5 | 71506529  | T | C | 0.3026 | 0.1501  | 0.0329 | 4.93E-06  | Yes | No  |

|             |   |           |   |   |        |         |        |           |     |     |
|-------------|---|-----------|---|---|--------|---------|--------|-----------|-----|-----|
| rs4443403   | 5 | 72654304  | T | C | 0.9031 | -0.2496 | 0.0513 | 1.13E-06  | Yes | No  |
| rs10078021  | 5 | 75038431  | T | G | 0.6274 | -0.0476 | 0.0317 | 0.1328    | Yes | No  |
| rs10057188  | 5 | 77837789  | A | G | 0.4584 | -0.2275 | 0.0307 | 1.19E-13  | Yes | No  |
| rs10059921  | 5 | 87514515  | T | G | 0.0825 | -0.4248 | 0.0587 | 4.39E-13  | Yes | No  |
| rs62380354  | 5 | 89484911  | A | C | 0.8916 | 0.2161  | 0.0511 | 2.36E-05  | Yes | No  |
| rs709668    | 5 | 96174186  | A | G | 0.2003 | -0.2943 | 0.0377 | 5.96E-15  | Yes | Yes |
| rs1871190   | 5 | 97953719  | T | G | 0.3349 | 0.1954  | 0.0324 | 1.66E-09  | Yes | Yes |
| rs286809    | 5 | 107458637 | A | G | 0.1725 | -0.1748 | 0.0399 | 1.20E-05  | Yes | No  |
| rs79409628  | 5 | 108113740 | T | G | 0.0845 | -0.2578 | 0.0543 | 2.04E-06  | Yes | No  |
| rs10077885  | 5 | 114390121 | A | C | 0.5084 | -0.259  | 0.0308 | 4.43E-17  | Yes | Yes |
| rs1432457   | 5 | 119781569 | A | G | 0.7152 | -0.1561 | 0.0334 | 2.94E-06  | Yes | No  |
| rs9885577   | 5 | 121194226 | T | C | 0.3709 | 0.2309  | 0.0321 | 6.53E-13  | Yes | No  |
| rs13359291  | 5 | 122476457 | A | G | 0.1573 | 0.4333  | 0.0415 | 1.64E-25  | Yes | Yes |
| rs6891344   | 5 | 123136656 | A | G | 0.8179 | 0.2706  | 0.0395 | 6.96E-12  | Yes | No  |
| rs62373688  | 5 | 127352807 | A | T | 0.1306 | 0.2742  | 0.0454 | 1.58E-09  | Yes | No  |
| rs6595838   | 5 | 127868199 | A | G | 0.2985 | 0.3229  | 0.0331 | 1.54E-22  | Yes | No  |
| rs12521868  | 5 | 131784393 | T | G | 0.4223 | -0.0872 | 0.0308 | 0.004612  | Yes | No  |
| rs55747751  | 5 | 132397351 | A | G | 0.0807 | -0.2776 | 0.0582 | 1.82E-06  | Yes | No  |
| rs702395    | 5 | 140086677 | T | C | 0.4369 | 0.2318  | 0.0305 | 3.24E-14  | Yes | No  |
| rs1650911   | 5 | 141740620 | C | G | 0.7647 | 0.2549  | 0.0368 | 4.34E-12  | Yes | No  |
| rs2400509   | 5 | 147696018 | A | G | 0.2583 | -0.1671 | 0.0344 | 1.21E-06  | Yes | No  |
| rs9687065   | 5 | 148391140 | A | G | 0.8099 | 0.3356  | 0.0387 | 4.62E-18  | Yes | No  |
| rs157678    | 5 | 156145654 | A | T | 0.6689 | -0.183  | 0.0329 | 2.66E-08  | Yes | No  |
| rs11953630  | 5 | 157845402 | T | C | 0.3659 | -0.4529 | 0.032  | 1.55E-45  | Yes | No  |
| rs62385385  | 5 | 158367249 | A | T | 0.3829 | 0.2834  | 0.031  | 6.30E-20  | Yes | No  |
| rs114503346 | 5 | 172192350 | T | C | 0.0458 | -0.1801 | 0.0746 | 0.01576   | Yes | No  |
| rs72812846  | 5 | 173377636 | A | T | 0.278  | -0.2579 | 0.0344 | 6.91E-14  | Yes | No  |
| rs28362590  | 5 | 176731452 | T | G | 0.7547 | 0.1302  | 0.0354 | 0.0002299 | Yes | No  |
| rs12153395  | 5 | 179411477 | A | G | 0.1147 | -0.3303 | 0.0486 | 1.07E-11  | Yes | No  |
| rs2745599   | 6 | 1613686   | A | G | 0.552  | 0.2164  | 0.0317 | 8.96E-12  | Yes | No  |
| rs1334576   | 6 | 7211818   | A | G | 0.4198 | -0.0706 | 0.0306 | 0.02107   | Yes | No  |
| rs9392172   | 6 | 7723962   | C | G | 0.5357 | -0.1969 | 0.0302 | 7.31E-11  | No  | No  |
| rs114275780 | 6 | 8224648   | A | T | 0.0592 | 0.3039  | 0.0675 | 6.78E-06  | Yes | No  |
| rs1630736   | 6 | 12295987  | T | C | 0.465  | -0.1706 | 0.0309 | 3.52E-08  | No  | No  |
| rs9349379   | 6 | 12903957  | A | G | 0.593  | 0.2664  | 0.0312 | 1.31E-17  | Yes | No  |
| rs12216497  | 6 | 19028623  | T | C | 0.5622 | 0.1551  | 0.0304 | 3.28E-07  | Yes | No  |
| rs9368222   | 6 | 20686996  | A | C | 0.2688 | 0.2281  | 0.0339 | 1.84E-11  | Yes | No  |
| rs6911827   | 6 | 22130601  | T | C | 0.4577 | 0.2378  | 0.0306 | 7.96E-15  | Yes | Yes |
| rs1799945   | 6 | 26091179  | C | G | 0.8505 | -0.5445 | 0.0426 | 1.83E-37  | Yes | No  |
| rs409558    | 6 | 31708147  | T | C | 0.8487 | 0.3844  | 0.0431 | 4.66E-19  | Yes | No  |
| rs115245297 | 6 | 34244132  | T | C | 0.9555 | -0.4453 | 0.0769 | 7.06E-09  | Yes | No  |
| rs3176336   | 6 | 36648816  | A | T | 0.6092 | 0.1083  | 0.0314 | 0.0005583 | Yes | No  |
| rs4714224   | 6 | 39186743  | C | G | 0.2779 | -0.0809 | 0.0341 | 0.01757   | Yes | No  |
| rs1563788   | 6 | 43308363  | T | C | 0.2867 | 0.3385  | 0.0332 | 2.36E-24  | Yes | No  |
| rs9472135   | 6 | 43809802  | T | C | 0.6986 | 0.0467  | 0.0332 | 0.1595    | Yes | No  |
| rs78648104  | 6 | 50683009  | T | C | 0.9075 | -0.4287 | 0.0541 | 2.37E-15  | Yes | No  |
| rs13205180  | 6 | 51832494  | T | C | 0.4877 | 0.1241  | 0.0303 | 4.31E-05  | Yes | No  |
| rs631441    | 6 | 53994626  | T | G | 0.6949 | -0.1686 | 0.0327 | 2.48E-07  | Yes | No  |
| rs1925153   | 6 | 56102780  | T | C | 0.4455 | -0.1193 | 0.0313 | 0.0001377 | Yes | No  |
| rs504691    | 6 | 72206620  | A | C | 0.4005 | -0.0362 | 0.0309 | 0.2407    | Yes | No  |
| rs12195276  | 6 | 73657714  | T | C | 0.7246 | -0.1672 | 0.034  | 9.05E-07  | Yes | No  |
| rs10943605  | 6 | 79655477  | A | G | 0.4887 | 0.239   | 0.0302 | 2.72E-15  | Yes | No  |
| rs7753695   | 6 | 80818531  | T | C | 0.4374 | 0.0979  | 0.0307 | 0.001441  | Yes | No  |
| rs9449350   | 6 | 82281417  | T | C | 0.6795 | -0.2189 | 0.0323 | 1.19E-11  | Yes | No  |
| rs60255247  | 6 | 85283253  | A | C | 0.8875 | 0.2191  | 0.0486 | 6.66E-06  | Yes | No  |
| rs35410524  | 6 | 96885405  | T | C | 0.1885 | 0.3368  | 0.0387 | 3.19E-18  | Yes | No  |
| rs9486916   | 6 | 109013930 | T | C | 0.1979 | 0.2657  | 0.0385 | 5.42E-12  | Yes | No  |
| rs3822857   | 6 | 116313931 | C | G | 0.3664 | -0.0837 | 0.0314 | 0.007753  | Yes | No  |
| rs2693560   | 6 | 117523671 | A | G | 0.366  | -0.206  | 0.0316 | 6.99E-11  | Yes | No  |
| rs2498586   | 6 | 118026126 | T | C | 0.1652 | -0.2073 | 0.0412 | 5.02E-07  | Yes | Yes |
| rs9372498   | 6 | 118572486 | A | T | 0.0812 | 0.3967  | 0.0556 | 9.43E-13  | Yes | No  |
| rs9401090   | 6 | 119113317 | T | C | 0.7457 | 0.1575  | 0.0349 | 6.29E-06  | Yes | No  |
| rs11154027  | 6 | 121781390 | T | C | 0.4606 | 0.063   | 0.0307 | 0.03993   | Yes | No  |
| rs6925750   | 6 | 122287990 | T | C | 0.8858 | 0.0896  | 0.0475 | 0.05928   | Yes | No  |
| rs10782230  | 6 | 126228512 | A | G | 0.4845 | 0.2106  | 0.0302 | 2.91E-12  | Yes | Yes |
| rs13209747  | 6 | 127115454 | T | C | 0.4413 | 0.5117  | 0.0305 | 2.49E-63  | Yes | No  |
| rs9885632   | 6 | 131311909 | T | C | 0.7309 | 0.2358  | 0.0341 | 4.37E-12  | Yes | Yes |
| rs4896104   | 6 | 135119089 | T | C | 0.5595 | -0.0703 | 0.0308 | 0.02258   | Yes | No  |
| rs668459    | 6 | 139835689 | T | C | 0.5859 | -0.1292 | 0.0305 | 2.27E-05  | Yes | No  |
| rs7763294   | 6 | 140383733 | T | G | 0.3163 | -0.2004 | 0.0324 | 6.39E-10  | Yes | No  |
| rs6941056   | 6 | 143591821 | C | G | 0.5582 | 0.1476  | 0.0306 | 1.37E-06  | No  | No  |
| rs7765526   | 6 | 147713764 | A | G | 0.4633 | 0.201   | 0.0307 | 5.88E-11  | Yes | Yes |

|             |   |           |   |   |        |         |        |           |     |     |
|-------------|---|-----------|---|---|--------|---------|--------|-----------|-----|-----|
| rs17080102  | 6 | 151004770 | C | G | 0.0694 | -0.8085 | 0.0594 | 3.52E-42  | Yes | No  |
| rs9479200   | 6 | 152398505 | A | G | 0.8856 | -0.2562 | 0.0478 | 8.28E-08  | Yes | No  |
| rs9479509   | 6 | 153427265 | A | G | 0.2959 | -0.1448 | 0.0333 | 1.15E-05  | Yes | No  |
| rs598682    | 6 | 154418759 | A | G | 0.2506 | -0.1566 | 0.0347 | 6.56E-06  | Yes | No  |
| rs449789    | 6 | 159699125 | C | G | 0.139  | 0.3233  | 0.0438 | 1.50E-13  | Yes | No  |
| rs555754    | 6 | 160769423 | A | G | 0.4749 | -0.1559 | 0.0302 | 2.41E-07  | Yes | No  |
| rs9456648   | 6 | 161712235 | T | C | 0.3227 | -0.1771 | 0.0322 | 3.76E-08  | Yes | No  |
| rs73030266  | 6 | 166179459 | A | T | 0.9331 | 0.4393  | 0.062  | 1.42E-12  | Yes | No  |
| rs4342401   | 6 | 169016615 | A | T | 0.5414 | -0.0639 | 0.0304 | 0.03573   | No  | No  |
| rs1322639   | 6 | 169587103 | A | G | 0.7761 | 0.1535  | 0.0365 | 2.59E-05  | Yes | No  |
| rs6959688   | 7 | 1966831   | A | G | 0.5981 | -0.2344 | 0.031  | 4.22E-14  | Yes | No  |
| rs2969070   | 7 | 2512545   | A | G | 0.6313 | -0.2726 | 0.0313 | 2.86E-18  | Yes | No  |
| rs73049928  | 7 | 4669949   | A | G | 0.8061 | -0.2382 | 0.0392 | 1.20E-09  | Yes | No  |
| rs1468520   | 7 | 7290732   | A | G | 0.8321 | -0.1874 | 0.0407 | 4.21E-06  | Yes | No  |
| rs13240040  | 7 | 14375977  | A | G | 0.6841 | 0.1753  | 0.0331 | 1.18E-07  | Yes | No  |
| rs2107595   | 7 | 19049388  | A | G | 0.159  | 0.4176  | 0.0415 | 7.37E-24  | Yes | No  |
| rs4507656   | 7 | 22156538  | C | G | 0.6934 | -0.2167 | 0.0351 | 6.78E-10  | No  | No  |
| rs2069833   | 7 | 22767664  | T | C | 0.5746 | -0.1988 | 0.0306 | 8.34E-11  | Yes | No  |
| rs12979     | 7 | 24738164  | C | G | 0.8698 | 0.2739  | 0.0449 | 1.09E-09  | Yes | Yes |
| rs1055144   | 7 | 25871109  | T | C | 0.1927 | 0.11    | 0.0382 | 0.003985  | Yes | No  |
| rs6969780   | 7 | 27159136  | C | G | 0.0918 | 0.2957  | 0.0526 | 1.88E-08  | Yes | No  |
| rs7777128   | 7 | 27337113  | C | G | 0.0798 | 0.5158  | 0.0557 | 2.06E-20  | Yes | No  |
| rs10274928  | 7 | 28142088  | A | G | 0.4845 | 0.1641  | 0.0306 | 8.15E-08  | Yes | No  |
| rs917275    | 7 | 28658522  | A | G | 0.6099 | -0.1726 | 0.0312 | 3.26E-08  | Yes | No  |
| rs10233127  | 7 | 30933453  | A | T | 0.1076 | 0.2555  | 0.0507 | 4.74E-07  | Yes | No  |
| rs342989    | 7 | 35467896  | A | G | 0.2282 | 0.0914  | 0.036  | 0.0112    | Yes | No  |
| rs2052263   | 7 | 36225818  | A | G | 0.1177 | 0.2543  | 0.0483 | 1.40E-07  | Yes | No  |
| rs76206723  | 7 | 40447971  | A | G | 0.107  | -0.4037 | 0.0491 | 2.02E-16  | Yes | No  |
| rs12701929  | 7 | 41722494  | T | C | 0.2498 | 0.1075  | 0.035  | 0.002107  | Yes | No  |
| rs1004558   | 7 | 44240407  | T | C | 0.1782 | 0.1639  | 0.0398 | 3.87E-05  | Yes | No  |
| rs73105827  | 7 | 45036785  | T | G | 0.0903 | -0.2232 | 0.0547 | 4.51E-05  | Yes | No  |
| rs11977526  | 7 | 46008110  | A | G | 0.4009 | -0.3213 | 0.0312 | 6.62E-25  | Yes | No  |
| rs71543920  | 7 | 46554358  | T | G | 0.9398 | -0.2142 | 0.0642 | 0.0008562 | Yes | No  |
| rs12668436  | 7 | 47548893  | T | C | 0.7541 | -0.2151 | 0.035  | 7.88E-10  | Yes | No  |
| rs17454517  | 7 | 50915776  | A | G | 0.4926 | 0.0276  | 0.0303 | 0.3629    | Yes | No  |
| rs6593297   | 7 | 56122058  | A | T | 0.3029 | 0.1674  | 0.0337 | 6.55E-07  | Yes | No  |
| rs2222544   | 7 | 69769369  | T | C | 0.737  | -0.1419 | 0.0342 | 3.36E-05  | Yes | No  |
| rs1091811   | 7 | 73491212  | A | G | 0.1688 | -0.1554 | 0.0405 | 0.0001262 | Yes | No  |
| rs34324971  | 7 | 74107374  | A | G | 0.1846 | 0.1515  | 0.0408 | 0.0002019 | Yes | No  |
| rs6963105   | 7 | 75097488  | A | G | 0.4388 | -0.1892 | 0.0321 | 3.83E-09  | Yes | No  |
| rs848445    | 7 | 77572461  | T | C | 0.2851 | -0.2025 | 0.0339 | 2.28E-09  | Yes | No  |
| rs11770630  | 7 | 89805241  | T | C | 0.5355 | 0.0386  | 0.0302 | 0.2014    | Yes | No  |
| rs10245696  | 7 | 90449362  | A | C | 0.4003 | 0.1695  | 0.0308 | 3.59E-08  | Yes | No  |
| rs2282978   | 7 | 92264410  | T | C | 0.6677 | 0.2802  | 0.0321 | 2.51E-18  | Yes | No  |
| rs1947228   | 7 | 96461649  | T | C | 0.418  | -0.1756 | 0.0308 | 1.19E-08  | Yes | No  |
| rs12705090  | 7 | 100467700 | T | C | 0.1896 | -0.0696 | 0.0386 | 0.07122   | Yes | No  |
| rs17477177  | 7 | 106411858 | T | C | 0.796  | -0.7351 | 0.0375 | 9.01E-86  | Yes | Yes |
| rs115172170 | 7 | 107019947 | T | C | 0.9441 | -0.3136 | 0.0662 | 2.14E-06  | Yes | No  |
| rs1997571   | 7 | 116198621 | A | G | 0.5911 | -0.1553 | 0.0307 | 4.09E-07  | Yes | No  |
| rs4728142   | 7 | 128573967 | A | G | 0.4439 | -0.1814 | 0.0305 | 2.59E-09  | Yes | Yes |
| rs11556924  | 7 | 129663496 | T | C | 0.3818 | -0.2097 | 0.0317 | 3.43E-11  | Yes | No  |
| rs34072724  | 7 | 130432469 | A | G | 0.4889 | -0.2422 | 0.0303 | 1.37E-15  | Yes | No  |
| rs13238550  | 7 | 131059056 | A | G | 0.3964 | 0.2572  | 0.0309 | 7.80E-17  | Yes | No  |
| rs1722886   | 7 | 134215259 | A | T | 0.5666 | 0.2072  | 0.0305 | 1.09E-11  | No  | No  |
| rs10267979  | 7 | 136618188 | A | T | 0.3245 | -0.1197 | 0.0322 | 0.000198  | Yes | No  |
| rs7810028   | 7 | 139461616 | C | G | 0.8068 | 0.2835  | 0.0382 | 1.24E-13  | Yes | No  |
| rs12703989  | 7 | 140238048 | A | G | 0.4991 | 0.1531  | 0.0306 | 5.82E-07  | Yes | No  |
| rs73727605  | 7 | 149474622 | A | G | 0.0663 | 0.3616  | 0.0623 | 6.60E-09  | Yes | No  |
| rs11771693  | 7 | 150050111 | A | G | 0.6755 | 0.183   | 0.0326 | 1.90E-08  | Yes | No  |
| rs3918226   | 7 | 150690176 | T | C | 0.0811 | 0.664   | 0.0575 | 8.46E-31  | Yes | No  |
| rs891511    | 7 | 150704843 | A | G | 0.3335 | -0.3506 | 0.0333 | 6.13E-26  | Yes | No  |
| rs10224002  | 7 | 151415041 | A | G | 0.7141 | -0.3672 | 0.0337 | 1.31E-27  | Yes | Yes |
| rs1870735   | 7 | 155744303 | C | G | 0.4531 | 0.206   | 0.0311 | 3.61E-11  | No  | No  |
| rs9638084   | 7 | 156311745 | A | G | 0.3979 | 0.1578  | 0.031  | 3.68E-07  | Yes | No  |
| rs4875958   | 8 | 1721090   | A | G | 0.7119 | 0.2256  | 0.0336 | 1.85E-11  | Yes | No  |
| rs2922895   | 8 | 6379932   | C | G | 0.43   | 0.1396  | 0.0306 | 4.94E-06  | No  | No  |
| rs61040371  | 8 | 8503700   | T | C | 0.6287 | 0.1836  | 0.0314 | 4.77E-09  | Yes | No  |
| rs62491354  | 8 | 9730663   | A | G | 0.1342 | 0.3087  | 0.0443 | 3.25E-12  | Yes | No  |
| rs1986971   | 8 | 10268736  | A | G | 0.7064 | 0.2565  | 0.0334 | 1.61E-14  | Yes | Yes |
| rs2898290   | 8 | 11433909  | T | C | 0.4762 | 0.3123  | 0.0304 | 1.08E-24  | Yes | No  |
| rs75902664  | 8 | 17427186  | A | G | 0.9742 | -0.2514 | 0.1002 | 0.01208   | Yes | No  |
| rs1047030   | 8 | 22428708  | A | G | 0.8045 | 0.2073  | 0.0408 | 3.71E-07  | Yes | No  |

|             |    |           |   |   |        |         |        |           |     |     |
|-------------|----|-----------|---|---|--------|---------|--------|-----------|-----|-----|
| rs62503324  | 8  | 23400615  | T | C | 0.2393 | 0.2638  | 0.0356 | 1.26E-13  | Yes | No  |
| rs6557876   | 8  | 25900675  | T | C | 0.2503 | -0.4156 | 0.0349 | 1.11E-32  | Yes | No  |
| rs17321041  | 8  | 26445194  | T | C | 0.0631 | 0.2943  | 0.0633 | 3.36E-06  | Yes | No  |
| rs2979470   | 8  | 30288272  | T | C | 0.49   | 0.1991  | 0.0302 | 4.62E-11  | Yes | Yes |
| rs11991469  | 8  | 32413280  | C | G | 0.5392 | -0.1118 | 0.0303 | 0.0002221 | No  | No  |
| rs7845722   | 8  | 33309993  | A | G | 0.6005 | -0.1269 | 0.0308 | 3.72E-05  | Yes | No  |
| rs1906672   | 8  | 38130025  | A | G | 0.2319 | 0.2966  | 0.0358 | 1.20E-16  | Yes | Yes |
| rs2978456   | 8  | 42324765  | T | C | 0.5517 | -0.1798 | 0.0313 | 8.95E-09  | No  | No  |
| rs4873492   | 8  | 51947549  | T | C | 0.1724 | -0.3431 | 0.0403 | 1.61E-17  | Yes | Yes |
| rs6996733   | 8  | 60535824  | T | C | 0.8488 | 0.2106  | 0.0426 | 7.79E-07  | Yes | No  |
| rs2354862   | 8  | 64501744  | A | C | 0.6407 | 0.2507  | 0.0317 | 2.42E-15  | Yes | No  |
| rs13253358  | 8  | 68920135  | T | C | 0.2979 | 0.2127  | 0.033  | 1.13E-10  | Yes | No  |
| rs1350100   | 8  | 76054904  | A | G | 0.4446 | 0.1028  | 0.0306 | 0.000781  | Yes | No  |
| rs1449544   | 8  | 76591880  | A | C | 0.5436 | 0.2117  | 0.0303 | 2.57E-12  | Yes | No  |
| rs72688070  | 8  | 81393697  | T | C | 0.1686 | -0.2705 | 0.0406 | 2.82E-11  | Yes | No  |
| rs56345595  | 8  | 82814156  | A | G | 0.5853 | 0.2066  | 0.0308 | 1.91E-11  | Yes | No  |
| rs2142141   | 8  | 90940205  | C | G | 0.5325 | -0.1476 | 0.0312 | 2.26E-06  | No  | No  |
| rs7009170   | 8  | 92149429  | T | C | 0.3189 | -0.2151 | 0.0324 | 3.01E-11  | Yes | No  |
| rs62526122  | 8  | 92769569  | A | G | 0.2899 | 0.2108  | 0.0345 | 1.02E-09  | Yes | No  |
| rs4582532   | 8  | 95969257  | A | G | 0.5059 | -0.2003 | 0.0303 | 3.64E-11  | Yes | No  |
| rs2978098   | 8  | 101676675 | A | C | 0.5468 | 0.2227  | 0.0307 | 3.78E-13  | Yes | No  |
| rs142449193 | 8  | 102750597 | T | C | 0.0464 | -0.4549 | 0.074  | 7.86E-10  | Yes | No  |
| rs2513877   | 8  | 103883630 | A | G | 0.1924 | -0.1586 | 0.0383 | 3.52E-05  | Yes | No  |
| rs35783704  | 8  | 105966258 | A | G | 0.1042 | -0.4619 | 0.0507 | 8.81E-20  | Yes | No  |
| rs28499085  | 8  | 110107161 | A | G | 0.7253 | 0.2096  | 0.0339 | 6.42E-10  | Yes | No  |
| rs2205260   | 8  | 116959837 | A | C | 0.1677 | 0.0666  | 0.0405 | 0.1002    | Yes | No  |
| rs2071518   | 8  | 120435812 | T | C | 0.2611 | 0.2757  | 0.0343 | 8.76E-16  | Yes | No  |
| rs62523863  | 8  | 126520544 | A | G | 0.2197 | 0.2689  | 0.0368 | 2.87E-13  | Yes | No  |
| rs4598218   | 8  | 129483956 | T | C | 0.6158 | 0.1911  | 0.0313 | 1.00E-09  | Yes | Yes |
| rs894344    | 8  | 135612745 | A | G | 0.5926 | -0.2136 | 0.0306 | 3.11E-12  | Yes | No  |
| rs4454254   | 8  | 141060027 | A | G | 0.6312 | -0.2177 | 0.0312 | 3.05E-12  | Yes | No  |
| rs10087782  | 8  | 141858620 | T | C | 0.4466 | 0.2254  | 0.0303 | 9.86E-14  | Yes | No  |
| rs34591516  | 8  | 142367087 | T | C | 0.0494 | 0.4862  | 0.071  | 7.65E-12  | Yes | No  |
| rs4129585   | 8  | 143312933 | A | C | 0.4413 | 0.1862  | 0.0305 | 1.03E-09  | Yes | Yes |
| rs62524579  | 8  | 144060955 | A | G | 0.533  | -0.2676 | 0.0321 | 6.87E-17  | Yes | No  |
| rs56233017  | 8  | 144981488 | A | G | 0.0458 | -0.1583 | 0.077  | 0.03988   | Yes | No  |
| rs520015    | 9  | 211762    | C | G | 0.513  | 0.2003  | 0.0301 | 2.84E-11  | No  | No  |
| rs60191654  | 9  | 753648    | A | G | 0.8118 | -0.2382 | 0.0385 | 5.88E-10  | Yes | No  |
| rs12216886  | 9  | 2493751   | T | G | 0.8073 | 0.1902  | 0.0382 | 6.30E-07  | Yes | No  |
| rs28558845  | 9  | 4334791   | C | G | 0.1553 | -0.2569 | 0.0422 | 1.16E-09  | Yes | No  |
| rs1332813   | 9  | 9350706   | T | C | 0.3514 | 0.2203  | 0.0314 | 2.32E-12  | Yes | No  |
| rs35287509  | 9  | 10594635  | T | C | 0.6627 | -0.1645 | 0.0319 | 2.57E-07  | Yes | No  |
| rs11789875  | 9  | 16872323  | A | G | 0.1519 | 0.1609  | 0.042  | 0.0001271 | Yes | No  |
| rs4977492   | 9  | 19057551  | T | C | 0.6624 | -0.124  | 0.0317 | 9.07E-05  | Yes | No  |
| rs4364717   | 9  | 21801530  | A | G | 0.5476 | -0.0993 | 0.0302 | 0.000995  | Yes | No  |
| rs9886665   | 9  | 22942770  | T | C | 0.2671 | 0.2048  | 0.0343 | 2.47E-09  | Yes | Yes |
| rs4553000   | 9  | 34223553  | T | C | 0.5141 | -0.2035 | 0.03   | 1.09E-11  | Yes | No  |
| rs76452347  | 9  | 35906471  | T | C | 0.205  | -0.2974 | 0.0397 | 7.13E-14  | No  | No  |
| rs11139596  | 9  | 85128518  | T | G | 0.7759 | -0.1167 | 0.037  | 0.001616  | Yes | No  |
| rs11141731  | 9  | 89888472  | T | C | 0.2272 | -0.1945 | 0.0359 | 6.19E-08  | Yes | No  |
| rs7045409   | 9  | 95201540  | A | T | 0.3669 | -0.1862 | 0.0313 | 2.55E-09  | Yes | No  |
| rs10988442  | 9  | 101739709 | A | G | 0.6193 | 0.1477  | 0.0311 | 2.04E-06  | Yes | No  |
| rs7020564   | 9  | 109670016 | A | T | 0.7007 | -0.0739 | 0.0332 | 0.02594   | Yes | No  |
| rs7043304   | 9  | 112358150 | T | C | 0.8545 | 0.1985  | 0.0432 | 4.31E-06  | Yes | No  |
| rs111245230 | 9  | 113169775 | T | C | 0.9654 | -0.7486 | 0.0834 | 2.81E-19  | Yes | No  |
| rs13290326  | 9  | 116696625 | T | C | 0.5014 | -0.2122 | 0.03   | 1.52E-12  | Yes | No  |
| rs10982910  | 9  | 118534500 | T | G | 0.9039 | -0.1196 | 0.0517 | 0.02066   | Yes | No  |
| rs1861881   | 9  | 119312256 | T | G | 0.316  | 0.1276  | 0.0323 | 7.63E-05  | Yes | No  |
| rs1953126   | 9  | 123640500 | T | C | 0.3536 | 0.1581  | 0.0315 | 5.20E-07  | Yes | No  |
| rs10818775  | 9  | 125755571 | T | C | 0.1213 | -0.302  | 0.0462 | 6.23E-11  | Yes | No  |
| rs7861040   | 9  | 127044135 | C | G | 0.367  | -0.1888 | 0.031  | 1.21E-09  | Yes | No  |
| rs72765298  | 9  | 127900996 | T | C | 0.8751 | -0.3675 | 0.0462 | 1.75E-15  | Yes | No  |
| rs7023828   | 9  | 128498594 | T | C | 0.418  | -0.2595 | 0.0306 | 2.17E-17  | Yes | No  |
| rs1891730   | 9  | 130309028 | T | C | 0.6166 | -0.1812 | 0.0314 | 7.74E-09  | Yes | Yes |
| rs7869756   | 9  | 131210410 | A | G | 0.8099 | -0.0724 | 0.039  | 0.06328   | Yes | No  |
| rs184457    | 9  | 131940019 | A | G | 0.308  | -0.1716 | 0.0326 | 1.43E-07  | Yes | No  |
| rs687621    | 9  | 136137065 | A | G | 0.6717 | 0.1026  | 0.0321 | 0.001399  | Yes | No  |
| rs6271      | 9  | 136522274 | T | C | 0.0735 | -0.5547 | 0.0611 | 1.18E-19  | No  | No  |
| rs11145807  | 9  | 139520789 | A | G | 0.4057 | 0.2135  | 0.0322 | 3.54E-11  | No  | No  |
| rs56352451  | 10 | 5804865   | T | C | 0.1324 | 0.2224  | 0.0444 | 5.51E-07  | Yes | No  |
| rs36006409  | 10 | 10876943  | T | G | 0.7937 | -0.159  | 0.0376 | 2.35E-05  | Yes | No  |
| rs10906391  | 10 | 13523937  | T | C | 0.3191 | 0.1254  | 0.0327 | 0.0001261 | Yes | No  |

|             |    |           |   |   |        |         |        |           |     |     |
|-------------|----|-----------|---|---|--------|---------|--------|-----------|-----|-----|
| rs4373814   | 10 | 18419972  | C | G | 0.4277 | 0.3266  | 0.0306 | 1.20E-26  | No  | No  |
| rs1813353   | 10 | 18707448  | T | C | 0.6625 | 0.5198  | 0.0319 | 8.15E-60  | Yes | No  |
| rs11010905  | 10 | 19934813  | A | T | 0.4854 | 0.0774  | 0.0302 | 0.01035   | No  | No  |
| rs72795925  | 10 | 20531420  | T | C | 0.2208 | 0.1246  | 0.0364 | 0.0006166 | Yes | No  |
| rs10732433  | 10 | 21037294  | T | C | 0.4206 | 0.1553  | 0.0306 | 3.79E-07  | Yes | No  |
| rs3802517   | 10 | 28233469  | A | T | 0.4618 | 0.2527  | 0.0301 | 4.65E-17  | No  | No  |
| rs1265842   | 10 | 28924901  | T | C | 0.4836 | 0.128   | 0.0304 | 2.53E-05  | Yes | No  |
| rs9337951   | 10 | 30317073  | A | G | 0.3414 | 0.1505  | 0.0334 | 6.46E-06  | No  | No  |
| rs11008355  | 10 | 31412561  | C | G | 0.2388 | -0.0559 | 0.0354 | 0.1143    | Yes | No  |
| rs10826995  | 10 | 32082658  | T | C | 0.7161 | -0.1936 | 0.0335 | 7.55E-09  | Yes | No  |
| rs76164690  | 10 | 32590362  | T | G | 0.8597 | -0.1967 | 0.0438 | 6.94E-06  | Yes | No  |
| rs2246438   | 10 | 45273079  | A | G | 0.2762 | -0.0453 | 0.0338 | 0.18      | Yes | No  |
| rs34130368  | 10 | 48411796  | T | G | 0.117  | -0.3016 | 0.0497 | 1.28E-09  | No  | No  |
| rs10761530  | 10 | 62390726  | T | C | 0.4989 | 0.2004  | 0.03   | 2.54E-11  | Yes | No  |
| rs1530440   | 10 | 63524591  | T | C | 0.1875 | -0.5669 | 0.0386 | 7.36E-49  | Yes | No  |
| rs7090758   | 10 | 65335315  | T | C | 0.5284 | -0.1607 | 0.0301 | 9.66E-08  | Yes | No  |
| rs7914287   | 10 | 69350563  | T | C | 0.7794 | -0.1889 | 0.0368 | 2.86E-07  | Yes | No  |
| rs10823136  | 10 | 69855363  | T | C | 0.9215 | -0.3501 | 0.0583 | 1.91E-09  | Yes | No  |
| rs10998362  | 10 | 70404159  | T | C | 0.3172 | 0.1072  | 0.0336 | 0.00141   | Yes | No  |
| rs12572586  | 10 | 74751579  | T | C | 0.9377 | -0.3899 | 0.0642 | 1.23E-09  | Yes | No  |
| rs10887914  | 10 | 82215288  | T | C | 0.4625 | 0.2007  | 0.0302 | 3.18E-11  | Yes | No  |
| rs77413490  | 10 | 89681688  | T | G | 0.0424 | 0.4489  | 0.0764 | 4.27E-09  | Yes | No  |
| rs11187142  | 10 | 94468685  | T | C | 0.1047 | 0.3312  | 0.0496 | 2.53E-11  | Yes | No  |
| rs932764    | 10 | 95895940  | A | G | 0.5689 | -0.4303 | 0.0306 | 5.43E-45  | Yes | Yes |
| rs4494250   | 10 | 96563757  | A | G | 0.3625 | 0.3038  | 0.0316 | 6.05E-22  | Yes | No  |
| rs603424    | 10 | 102075479 | A | G | 0.1784 | 0.233   | 0.0402 | 6.67E-09  | Yes | No  |
| rs112184198 | 10 | 102604514 | A | G | 0.1047 | -0.6626 | 0.0498 | 1.94E-40  | Yes | No  |
| rs72847884  | 10 | 103115345 | A | G | 0.9534 | 0.1035  | 0.0741 | 0.1626    | Yes | No  |
| rs11191156  | 10 | 103702763 | A | G | 0.6484 | -0.1553 | 0.0317 | 9.57E-07  | Yes | No  |
| rs11191548  | 10 | 104846178 | T | C | 0.9188 | 1.0983  | 0.0553 | 1.16E-87  | Yes | Yes |
| rs4387287   | 10 | 105677897 | A | C | 0.165  | 0.2282  | 0.0408 | 2.26E-08  | Yes | No  |
| rs191784289 | 10 | 106894942 | T | C | 0.0121 | 1.2287  | 0.1432 | 9.24E-18  | Yes | No  |
| rs111777102 | 10 | 111965826 | T | C | 0.0661 | 0.2908  | 0.0617 | 2.39E-06  | Yes | No  |
| rs34872471  | 10 | 114754071 | T | C | 0.7076 | -0.2201 | 0.0333 | 3.83E-11  | Yes | No  |
| rs2782980   | 10 | 115781527 | T | C | 0.2841 | -0.4249 | 0.0338 | 3.58E-36  | Yes | No  |
| rs11197813  | 10 | 118523933 | A | G | 0.6992 | -0.182  | 0.033  | 3.53E-08  | Yes | Yes |
| rs72842207  | 10 | 121433675 | T | C | 0.2144 | -0.203  | 0.0367 | 3.14E-08  | Yes | No  |
| rs11592107  | 10 | 122968964 | A | G | 0.3096 | 0.3024  | 0.0326 | 1.55E-20  | Yes | Yes |
| rs72834453  | 10 | 124235226 | T | G | 0.8756 | -0.3246 | 0.0465 | 2.95E-12  | Yes | No  |
| rs4411245   | 10 | 126712781 | A | G | 0.2934 | 0.1254  | 0.0331 | 0.0001512 | Yes | No  |
| rs7096563   | 10 | 133770229 | A | G | 0.3548 | 0.21    | 0.0321 | 6.39E-11  | Yes | No  |
| rs1133400   | 10 | 134459388 | A | G | 0.786  | -0.2975 | 0.0376 | 2.53E-15  | Yes | Yes |
| rs7126805   | 11 | 828916    | A | G | 0.7277 | 0.1599  | 0.0349 | 4.46E-06  | Yes | No  |
| rs661348    | 11 | 1905292   | T | C | 0.5747 | -0.4451 | 0.0316 | 5.23E-45  | Yes | Yes |
| rs17224476  | 11 | 4673788   | A | G | 0.1113 | 0.2078  | 0.0482 | 1.61E-05  | Yes | No  |
| rs2929184   | 11 | 6289118   | A | G | 0.771  | 0.1294  | 0.0372 | 0.0005068 | Yes | No  |
| rs110419    | 11 | 8252853   | A | G | 0.4785 | 0.1133  | 0.0299 | 0.0001519 | Yes | No  |
| rs10743086  | 11 | 8774923   | A | G | 0.2072 | -0.2053 | 0.0373 | 3.60E-08  | Yes | No  |
| rs360153    | 11 | 9762274   | T | C | 0.4166 | -0.3445 | 0.0306 | 1.73E-29  | Yes | No  |
| rs7129220   | 11 | 10350538  | A | G | 0.1192 | 0.5002  | 0.0472 | 2.96E-26  | Yes | Yes |
| rs900145    | 11 | 13293905  | T | C | 0.7043 | 0.1786  | 0.0329 | 5.63E-08  | Yes | No  |
| rs4757391   | 11 | 16302939  | T | C | 0.798  | -0.5112 | 0.0375 | 2.07E-42  | Yes | No  |
| rs381815    | 11 | 16902268  | T | C | 0.2746 | 0.3009  | 0.0338 | 5.62E-19  | Yes | No  |
| rs5219      | 11 | 17409572  | T | C | 0.3657 | 0.3474  | 0.0312 | 9.18E-29  | Yes | No  |
| rs10766533  | 11 | 19224677  | A | T | 0.7108 | 0.2099  | 0.0337 | 4.69E-10  | Yes | Yes |
| rs11026586  | 11 | 22515533  | A | G | 0.0705 | 0.4341  | 0.0597 | 3.66E-13  | Yes | No  |
| rs11030119  | 11 | 27728102  | A | G | 0.3013 | -0.2218 | 0.033  | 1.79E-11  | Yes | No  |
| rs871004    | 11 | 28512458  | A | G | 0.3481 | 0.2336  | 0.0317 | 1.65E-13  | Yes | Yes |
| rs11031051  | 11 | 30355707  | A | C | 0.6901 | -0.2238 | 0.0327 | 7.73E-12  | Yes | No  |
| rs919045    | 11 | 31111810  | T | C | 0.6281 | 0.1704  | 0.0312 | 4.64E-08  | Yes | No  |
| rs4922591   | 11 | 32374199  | T | C | 0.3869 | -0.1892 | 0.0314 | 1.76E-09  | Yes | No  |
| rs190194639 | 11 | 34068037  | T | C | 0.0766 | 0.3023  | 0.0577 | 1.61E-07  | Yes | No  |
| rs7480089   | 11 | 45207851  | A | G | 0.118  | -0.2614 | 0.0471 | 2.94E-08  | Yes | No  |
| rs1585453   | 11 | 46884713  | A | T | 0.8868 | -0.3825 | 0.049  | 6.15E-15  | Yes | No  |
| rs7103648   | 11 | 47461783  | A | G | 0.6129 | -0.3862 | 0.031  | 1.27E-35  | Yes | No  |
| rs11537751  | 11 | 47587452  | T | C | 0.0548 | 0.4404  | 0.0674 | 6.30E-11  | Yes | No  |
| rs2688716   | 11 | 54835623  | T | G | 0.2894 | -0.2479 | 0.035  | 1.37E-12  | No  | No  |
| rs75905900  | 11 | 55113534  | A | C | 0.8656 | 0.4174  | 0.0449 | 1.36E-20  | Yes | No  |
| rs11607056  | 11 | 57496820  | T | C | 0.3276 | -0.2511 | 0.0321 | 4.79E-15  | Yes | No  |
| rs11229457  | 11 | 58207203  | T | C | 0.213  | -0.317  | 0.0369 | 8.45E-18  | Yes | Yes |
| rs751984    | 11 | 61278246  | T | C | 0.8824 | 0.4408  | 0.0479 | 3.60E-20  | Yes | No  |
| rs4980515   | 11 | 63744609  | T | C | 0.4993 | 0.2253  | 0.0303 | 9.73E-14  | Yes | No  |

|             |    |           |   |   |        |         |        |           |     |     |
|-------------|----|-----------|---|---|--------|---------|--------|-----------|-----|-----|
| rs3741378   | 11 | 65408937  | T | C | 0.1352 | -0.4087 | 0.0446 | 4.83E-20  | Yes | Yes |
| rs67976715  | 11 | 68023742  | C | G | 0.2342 | 0.2082  | 0.0359 | 6.80E-09  | Yes | No  |
| rs67330701  | 11 | 69079707  | T | C | 0.0936 | -0.3913 | 0.0563 | 3.63E-12  | Yes | No  |
| rs875106    | 11 | 70005641  | A | G | 0.5222 | -0.0824 | 0.0302 | 0.006299  | Yes | No  |
| rs504217    | 11 | 72006086  | T | C | 0.0738 | 0.3855  | 0.0583 | 3.90E-11  | Yes | No  |
| rs2298807   | 11 | 73068571  | T | C | 0.784  | 0.1501  | 0.0368 | 4.49E-05  | Yes | No  |
| rs4420291   | 11 | 74374950  | A | G | 0.5057 | 0.0745  | 0.0303 | 0.01385   | Yes | No  |
| rs7927515   | 11 | 76125330  | A | C | 0.3459 | 0.2271  | 0.0319 | 1.05E-12  | Yes | Yes |
| rs59986178  | 11 | 77359909  | C | G | 0.1043 | 0.1284  | 0.0516 | 0.01278   | Yes | No  |
| rs2450128   | 11 | 77940075  | A | G | 0.1544 | -0.1728 | 0.0419 | 3.65E-05  | Yes | No  |
| rs2289125   | 11 | 89224453  | A | C | 0.2205 | -0.2592 | 0.0375 | 4.90E-12  | Yes | No  |
| rs10830963  | 11 | 92708710  | C | G | 0.7235 | -0.1324 | 0.0347 | 0.0001389 | Yes | No  |
| rs11021221  | 11 | 95308854  | A | T | 0.1663 | 0.0019  | 0.0406 | 0.9631    | Yes | No  |
| rs633185    | 11 | 100593538 | C | G | 0.7127 | 0.6373  | 0.0334 | 5.60E-81  | Yes | No  |
| rs61892344  | 11 | 101100768 | T | C | 0.1738 | -0.0948 | 0.0399 | 0.01738   | Yes | No  |
| rs12807220  | 11 | 102077200 | A | G | 0.3593 | -0.0718 | 0.0317 | 0.02337   | Yes | No  |
| rs4754196   | 11 | 107096777 | A | G | 0.5216 | -0.3486 | 0.0303 | 1.46E-30  | Yes | No  |
| rs12362593  | 11 | 111586091 | C | G | 0.729  | -0.2004 | 0.0347 | 7.91E-09  | Yes | No  |
| rs17119370  | 11 | 116097136 | A | T | 0.6926 | 0.2207  | 0.033  | 2.16E-11  | Yes | Yes |
| rs1076485   | 11 | 116772441 | T | C | 0.1304 | 0.3388  | 0.0457 | 1.19E-13  | Yes | No  |
| rs8258      | 11 | 117283676 | T | C | 0.3739 | 0.1648  | 0.0312 | 1.29E-07  | Yes | No  |
| rs12574332  | 11 | 122521123 | T | C | 0.1231 | 0.2452  | 0.0463 | 1.20E-07  | Yes | No  |
| rs11222386  | 11 | 130779068 | C | G | 0.1973 | 0.153   | 0.038  | 5.57E-05  | Yes | No  |
| rs78998485  | 12 | 434755    | C | G | 0.7443 | -0.2449 | 0.0346 | 1.48E-12  | Yes | No  |
| rs11571376  | 12 | 1059556   | C | G | 0.7057 | -0.1803 | 0.0332 | 5.70E-08  | Yes | No  |
| rs55935819  | 12 | 2521579   | A | G | 0.3634 | 0.1745  | 0.0313 | 2.43E-08  | Yes | No  |
| rs117233107 | 12 | 4328521   | A | G | 0.0158 | -0.6366 | 0.1368 | 3.27E-06  | Yes | No  |
| rs75507123  | 12 | 5417856   | T | G | 0.1276 | -0.2319 | 0.0452 | 2.86E-07  | Yes | No  |
| rs7132012   | 12 | 8832203   | A | G | 0.6748 | 0.2     | 0.0321 | 4.76E-10  | Yes | No  |
| rs2024385   | 12 | 12888438  | A | T | 0.424  | -0.2642 | 0.0306 | 5.88E-18  | No  | No  |
| rs28621435  | 12 | 13860990  | A | G | 0.1151 | -0.2976 | 0.0482 | 6.47E-10  | Yes | No  |
| rs7313556   | 12 | 15297359  | A | G | 0.3484 | -0.048  | 0.0313 | 0.1254    | Yes | No  |
| rs61912333  | 12 | 19554817  | C | G | 0.4968 | 0.1837  | 0.0304 | 1.57E-09  | No  | No  |
| rs12579720  | 12 | 20173764  | C | G | 0.2434 | -0.258  | 0.0352 | 2.46E-13  | Yes | No  |
| rs73080726  | 12 | 20754154  | T | C | 0.102  | -0.2444 | 0.0499 | 9.69E-07  | Yes | No  |
| rs704191    | 12 | 22015022  | T | C | 0.4629 | 0.1526  | 0.0302 | 4.46E-07  | Yes | No  |
| rs7976167   | 12 | 24210599  | T | C | 0.6889 | 0.1784  | 0.0324 | 3.81E-08  | Yes | Yes |
| rs17287293  | 12 | 24770878  | A | G | 0.8508 | -0.0703 | 0.042  | 0.09424   | Yes | No  |
| rs6487543   | 12 | 26438189  | A | G | 0.7699 | 0.1904  | 0.0368 | 2.29E-07  | Yes | No  |
| rs1098708   | 12 | 27321112  | A | G | 0.5423 | -0.1969 | 0.0303 | 8.21E-11  | Yes | No  |
| rs10842991  | 12 | 27962103  | T | C | 0.1975 | -0.0908 | 0.0381 | 0.01731   | Yes | No  |
| rs7965392   | 12 | 42540280  | A | G | 0.3866 | 0.0935  | 0.031  | 0.00257   | Yes | No  |
| rs11168245  | 12 | 48204499  | C | G | 0.7655 | 0.2784  | 0.0357 | 5.83E-15  | No  | No  |
| rs2261608   | 12 | 48721634  | A | T | 0.3511 | 0.1723  | 0.0313 | 3.65E-08  | Yes | No  |
| rs1126930   | 12 | 49399132  | C | G | 0.035  | 0.6378  | 0.0856 | 9.48E-14  | Yes | No  |
| rs7977389   | 12 | 49981722  | T | C | 0.8938 | 0.2575  | 0.049  | 1.46E-07  | Yes | No  |
| rs7302981   | 12 | 50537815  | A | G | 0.3788 | 0.3755  | 0.0308 | 2.77E-34  | Yes | No  |
| rs61926181  | 12 | 50767037  | A | G | 0.0384 | -0.6472 | 0.0846 | 2.02E-14  | Yes | No  |
| rs73099903  | 12 | 53440779  | T | C | 0.0824 | 0.4694  | 0.0557 | 3.43E-17  | Yes | No  |
| rs7297416   | 12 | 54443090  | A | C | 0.6955 | 0.3764  | 0.0329 | 2.90E-30  | Yes | Yes |
| rs7137749   | 12 | 57098040  | T | C | 0.3675 | 0.0775  | 0.0314 | 0.0136    | Yes | No  |
| rs10437954  | 12 | 58003922  | A | G | 0.9069 | -0.4101 | 0.0534 | 1.60E-14  | Yes | No  |
| rs4143175   | 12 | 67782397  | T | C | 0.2409 | 0.2187  | 0.0352 | 5.10E-10  | Yes | Yes |
| rs513177    | 12 | 69950545  | T | C | 0.1405 | 0.2386  | 0.0431 | 3.06E-08  | No  | No  |
| rs7963801   | 12 | 79685226  | T | C | 0.4221 | -0.2362 | 0.0311 | 2.87E-14  | No  | No  |
| rs17249754  | 12 | 90060586  | A | G | 0.1683 | -0.8446 | 0.0403 | 1.25E-97  | Yes | Yes |
| rs10858966  | 12 | 90567026  | C | G | 0.2989 | 0.2565  | 0.0331 | 9.27E-15  | Yes | No  |
| rs76785029  | 12 | 94882905  | T | C | 0.0787 | -0.1901 | 0.0582 | 0.001084  | Yes | No  |
| rs7977311   | 12 | 95487226  | T | C | 0.1154 | -0.2296 | 0.0469 | 1.00E-06  | Yes | No  |
| rs11108209  | 12 | 96109855  | T | C | 0.9069 | -0.1849 | 0.0521 | 0.0003823 | Yes | No  |
| rs7134060   | 12 | 96717095  | A | G | 0.4465 | -0.1109 | 0.0301 | 0.0002284 | Yes | No  |
| rs10778174  | 12 | 102838996 | A | G | 0.2479 | -0.2209 | 0.0348 | 2.08E-10  | Yes | No  |
| rs11112548  | 12 | 105871914 | A | T | 0.9556 | 0.5092  | 0.0768 | 3.34E-11  | Yes | Yes |
| rs12184466  | 12 | 111281636 | T | C | 0.1991 | 0.2992  | 0.0434 | 5.30E-12  | No  | No  |
| rs3184504   | 12 | 111884608 | T | C | 0.48   | 0.5779  | 0.0303 | 6.54E-81  | Yes | No  |
| rs10850411  | 12 | 115387796 | T | C | 0.6969 | 0.2908  | 0.0326 | 4.58E-19  | Yes | No  |
| rs35444     | 12 | 115552437 | A | G | 0.6138 | 0.4368  | 0.031  | 3.47E-45  | Yes | No  |
| rs11067763  | 12 | 116198341 | A | G | 0.8983 | 0.3069  | 0.05   | 8.10E-10  | Yes | No  |
| rs11615689  | 12 | 116699675 | T | C | 0.8196 | -0.1511 | 0.039  | 0.0001057 | Yes | No  |
| rs3898618   | 12 | 120813921 | T | C | 0.9445 | -0.3089 | 0.0664 | 3.33E-06  | Yes | No  |
| rs28498002  | 12 | 122599796 | T | C | 0.4751 | -0.1604 | 0.031  | 2.19E-07  | Yes | No  |
| rs1060105   | 12 | 123806219 | T | C | 0.203  | -0.1025 | 0.0375 | 0.006263  | Yes | No  |

|             |    |           |   |   |        |         |        |           |     |     |
|-------------|----|-----------|---|---|--------|---------|--------|-----------|-----|-----|
| rs1271309   | 12 | 124820705 | A | G | 0.162  | -0.1607 | 0.0416 | 0.0001106 | Yes | No  |
| rs117206641 | 12 | 133086888 | T | C | 0.1108 | 0.3154  | 0.0499 | 2.66E-10  | Yes | No  |
| rs2480171   | 13 | 21559858  | T | C | 0.1221 | 0.2909  | 0.0467 | 4.69E-10  | Yes | No  |
| rs606950    | 13 | 22298923  | A | G | 0.6163 | 0.2704  | 0.0311 | 3.23E-18  | Yes | No  |
| rs55641580  | 13 | 25257917  | T | C | 0.1262 | 0.2685  | 0.046  | 5.29E-09  | Yes | No  |
| rs1331012   | 13 | 27115424  | T | G | 0.2703 | 0.2043  | 0.0338 | 1.49E-09  | Yes | No  |
| rs63418562  | 13 | 30146201  | T | C | 0.7565 | -0.3557 | 0.0353 | 6.34E-24  | No  | No  |
| rs9532243   | 13 | 32191408  | A | C | 0.4839 | 0.2241  | 0.03   | 8.17E-14  | Yes | No  |
| rs9549297   | 13 | 41397482  | A | G | 0.8207 | -0.1101 | 0.0397 | 0.005558  | Yes | No  |
| rs4274337   | 13 | 41967193  | A | G | 0.1697 | -0.2968 | 0.0406 | 2.48E-13  | Yes | No  |
| rs73187288  | 13 | 42738672  | A | C | 0.8909 | -0.2766 | 0.0483 | 1.04E-08  | Yes | No  |
| rs912434    | 13 | 47189928  | T | G | 0.7594 | 0.234   | 0.0351 | 2.47E-11  | Yes | Yes |
| rs12583615  | 13 | 50564085  | A | G | 0.1321 | 0.1457  | 0.0446 | 0.00109   | Yes | No  |
| rs9526707   | 13 | 51489186  | A | G | 0.3216 | -0.2039 | 0.0323 | 2.77E-10  | Yes | No  |
| rs75961402  | 13 | 56398286  | A | G | 0.1534 | 0.2659  | 0.0418 | 1.95E-10  | Yes | No  |
| rs9563529   | 13 | 58316637  | T | G | 0.204  | 0.1859  | 0.0373 | 6.30E-07  | Yes | No  |
| rs3861113   | 13 | 72364382  | A | C | 0.0838 | 0.2231  | 0.0555 | 5.92E-05  | Yes | No  |
| rs78474310  | 13 | 73826901  | A | G | 0.9552 | -0.4699 | 0.0734 | 1.51E-10  | Yes | No  |
| rs4304924   | 13 | 79238925  | A | G | 0.5671 | -0.0927 | 0.0306 | 0.002421  | Yes | No  |
| rs7988232   | 13 | 79808655  | A | G | 0.4113 | 0.1525  | 0.0307 | 6.91E-07  | Yes | No  |
| rs1215469   | 13 | 80707408  | A | C | 0.2297 | -0.2124 | 0.0365 | 6.16E-09  | Yes | No  |
| rs55684003  | 13 | 97988689  | A | G | 0.6964 | 0.1172  | 0.0327 | 0.0003369 | Yes | No  |
| rs3742182   | 13 | 111375132 | T | C | 0.8098 | -0.2058 | 0.0382 | 7.30E-08  | Yes | No  |
| rs9549328   | 13 | 113636156 | T | C | 0.2305 | 0.2915  | 0.0362 | 7.91E-16  | Yes | No  |
| rs7331680   | 13 | 115000650 | T | G | 0.1491 | 0.4101  | 0.0423 | 3.35E-22  | Yes | No  |
| rs17880989  | 14 | 23313633  | A | G | 0.0259 | 0.5248  | 0.1027 | 3.27E-07  | No  | No  |
| rs452036    | 14 | 23865885  | A | G | 0.3546 | -0.2218 | 0.0315 | 2.02E-12  | Yes | No  |
| rs17115145  | 14 | 30122409  | T | C | 0.3967 | 0.1775  | 0.0307 | 7.39E-09  | Yes | Yes |
| rs4424827   | 14 | 35110857  | T | C | 0.567  | -0.1269 | 0.0303 | 2.79E-05  | Yes | No  |
| rs8904      | 14 | 35871217  | A | G | 0.3678 | 0.3061  | 0.0314 | 1.71E-22  | Yes | No  |
| rs34983854  | 14 | 39858442  | A | G | 0.6028 | -0.2056 | 0.0307 | 2.06E-11  | Yes | No  |
| rs72683923  | 14 | 50735947  | T | C | 0.9788 | 0.9587  | 0.1101 | 3.08E-18  | No  | No  |
| rs9888615   | 14 | 53377540  | T | C | 0.291  | -0.274  | 0.0332 | 1.46E-16  | Yes | Yes |
| rs210381    | 14 | 54107791  | A | G | 0.5651 | -0.1446 | 0.0303 | 1.88E-06  | Yes | No  |
| rs7144602   | 14 | 55285588  | T | G | 0.6488 | -0.1575 | 0.0317 | 6.52E-07  | Yes | No  |
| rs11628933  | 14 | 60700903  | C | G | 0.2335 | -0.1025 | 0.0357 | 0.00409   | Yes | No  |
| rs731681    | 14 | 68010224  | C | G | 0.5585 | -0.154  | 0.0302 | 3.40E-07  | No  | No  |
| rs57786342  | 14 | 69260028  | A | G | 0.2059 | 0.2317  | 0.0374 | 5.63E-10  | Yes | No  |
| rs11623535  | 14 | 72462381  | A | G | 0.7439 | 0.2095  | 0.0343 | 1.02E-09  | Yes | Yes |
| rs4903064   | 14 | 73279420  | T | C | 0.7643 | -0.0277 | 0.0357 | 0.4381    | Yes | No  |
| rs11159091  | 14 | 75074316  | A | G | 0.4615 | 0.1978  | 0.0303 | 6.79E-11  | Yes | Yes |
| rs11627326  | 14 | 85785251  | C | G | 0.2869 | 0.0937  | 0.0333 | 0.004916  | Yes | No  |
| rs4904503   | 14 | 89565130  | T | C | 0.2976 | 0.0875  | 0.033  | 0.00802   | Yes | No  |
| rs11160085  | 14 | 93112102  | T | C | 0.7039 | 0.1565  | 0.0335 | 3.00E-06  | Yes | No  |
| rs8013933   | 14 | 94465789  | T | C | 0.6913 | 0.2027  | 0.0327 | 5.48E-10  | Yes | No  |
| rs9323988   | 14 | 98587630  | T | C | 0.6152 | -0.2491 | 0.0309 | 6.83E-16  | Yes | No  |
| rs1475130   | 14 | 100225144 | T | C | 0.346  | -0.1977 | 0.0318 | 4.83E-10  | Yes | No  |
| rs28470843  | 14 | 100742658 | T | C | 0.5971 | 0.1185  | 0.0309 | 0.0001262 | Yes | No  |
| rs11626434  | 14 | 101998443 | C | G | 0.3615 | -0.1094 | 0.0321 | 0.0006515 | Yes | No  |
| rs8014182   | 14 | 103859962 | T | C | 0.1324 | -0.3339 | 0.0444 | 5.23E-14  | Yes | No  |
| rs34161718  | 14 | 104620193 | T | C | 0.242  | -0.1482 | 0.0376 | 8.04E-05  | No  | No  |
| rs10873612  | 15 | 26105602  | T | C | 0.5957 | -0.1053 | 0.031  | 0.0006929 | Yes | No  |
| rs11629850  | 15 | 40317075  | A | G | 0.5287 | 0.2297  | 0.0301 | 2.26E-14  | Yes | No  |
| rs2925345   | 15 | 41311799  | T | C | 0.4678 | 0.274   | 0.0301 | 9.14E-20  | Yes | No  |
| rs4924570   | 15 | 41974660  | T | C | 0.6287 | -0.211  | 0.0314 | 1.80E-11  | Yes | No  |
| rs1036477   | 15 | 48914926  | A | G | 0.8971 | 0.3843  | 0.0494 | 6.88E-15  | Yes | No  |
| rs3098186   | 15 | 50810621  | T | C | 0.5156 | -0.2422 | 0.0303 | 1.41E-15  | Yes | No  |
| rs3191402   | 15 | 59429160  | A | G | 0.4068 | -0.1217 | 0.0311 | 8.94E-05  | No  | No  |
| rs956006    | 15 | 62808539  | T | C | 0.3309 | -0.0963 | 0.0323 | 0.002828  | Yes | No  |
| rs832890    | 15 | 65166309  | T | C | 0.465  | 0.0943  | 0.0302 | 0.001806  | Yes | No  |
| rs7178615   | 15 | 66869072  | A | G | 0.3768 | -0.1647 | 0.0312 | 1.32E-07  | Yes | No  |
| rs2289261   | 15 | 67457485  | C | G | 0.6523 | -0.11   | 0.0316 | 0.0005069 | Yes | No  |
| rs62004794  | 15 | 68454523  | A | G | 0.4393 | -0.0971 | 0.0302 | 0.001301  | Yes | No  |
| rs11853359  | 15 | 71621524  | A | G | 0.3321 | -0.0241 | 0.0317 | 0.4466    | Yes | No  |
| rs61653296  | 15 | 74557817  | A | G | 0.8008 | -0.1836 | 0.0378 | 1.17E-06  | Yes | No  |
| rs1378942   | 15 | 75077367  | A | C | 0.6676 | -0.5076 | 0.032  | 9.37E-57  | Yes | No  |
| rs11634028  | 15 | 76276150  | A | T | 0.2143 | 0.1907  | 0.0376 | 3.84E-07  | Yes | No  |
| rs62011052  | 15 | 79156983  | T | C | 0.8493 | -0.1105 | 0.0422 | 0.00888   | Yes | No  |
| rs2759308   | 15 | 81016227  | A | G | 0.4749 | 0.3155  | 0.0303 | 1.89E-25  | Yes | Yes |
| rs2034618   | 15 | 83799632  | T | C | 0.2225 | 0.0099  | 0.0363 | 0.7857    | Yes | No  |
| rs899927    | 15 | 84561879  | T | C | 0.3177 | 0.0836  | 0.0326 | 0.01027   | Yes | No  |
| rs7180952   | 15 | 85162551  | T | C | 0.5385 | -0.0719 | 0.0305 | 0.01827   | Yes | No  |



|             |    |           |   |   |        |         |        |           |     |     |
|-------------|----|-----------|---|---|--------|---------|--------|-----------|-----|-----|
| rs3743157   | 15 | 85680532  | A | C | 0.1669 | 0.293   | 0.0404 | 4.20E-13  | Yes | Yes |
| rs11632436  | 15 | 86295286  | C | G | 0.5035 | 0.222   | 0.0302 | 1.96E-13  | No  | No  |
| rs28611491  | 15 | 90641809  | T | C | 0.0814 | 0.3343  | 0.0576 | 6.54E-09  | Yes | No  |
| rs2521501   | 15 | 91437388  | A | T | 0.6745 | -0.6314 | 0.0331 | 6.40E-81  | No  | No  |
| rs873122    | 15 | 92702020  | C | G | 0.7197 | 0.1373  | 0.0339 | 5.04E-05  | Yes | No  |
| rs11632112  | 15 | 93468276  | C | G | 0.2405 | -0.1771 | 0.0353 | 5.39E-07  | Yes | No  |
| rs12906962  | 15 | 95312071  | T | C | 0.676  | -0.2653 | 0.0325 | 3.28E-16  | Yes | No  |
| rs4984496   | 15 | 96635898  | T | G | 0.3359 | 0.0744  | 0.0325 | 0.02192   | Yes | No  |
| rs34756251  | 15 | 100192540 | T | C | 0.171  | -0.2616 | 0.0399 | 5.44E-11  | Yes | No  |
| rs9932866   | 16 | 706067    | A | G | 0.3668 | 0.1596  | 0.0318 | 5.14E-07  | Yes | No  |
| rs11248862  | 16 | 1344291   | A | G | 0.1252 | 0.2796  | 0.0463 | 1.53E-09  | Yes | No  |
| rs28590346  | 16 | 2080653   | A | T | 0.6597 | -0.2709 | 0.0332 | 3.37E-16  | Yes | No  |
| rs2379829   | 16 | 3538873   | C | G | 0.7304 | -0.2678 | 0.0342 | 4.48E-15  | Yes | Yes |
| rs4785955   | 16 | 4297651   | T | G | 0.2181 | 0.1382  | 0.0375 | 0.0002264 | Yes | No  |
| rs12921187  | 16 | 4943019   | T | G | 0.4283 | -0.2925 | 0.0303 | 5.19E-22  | Yes | No  |
| rs35450617  | 16 | 6889675   | T | G | 0.6993 | -0.1773 | 0.0333 | 1.05E-07  | Yes | No  |
| rs11642631  | 16 | 11198835  | T | C | 0.5621 | -0.0936 | 0.0303 | 0.002003  | Yes | No  |
| rs57327054  | 16 | 14487036  | T | C | 0.3082 | -0.0757 | 0.0331 | 0.02208   | Yes | No  |
| rs3915425   | 16 | 15912544  | T | C | 0.6819 | 0.206   | 0.0323 | 1.86E-10  | Yes | No  |
| rs4782211   | 16 | 19152219  | A | G | 0.2712 | 0.1775  | 0.0363 | 9.92E-07  | No  | No  |
| rs13333226  | 16 | 20365654  | A | G | 0.8156 | 0.377   | 0.0386 | 1.70E-22  | Yes | No  |
| rs11639856  | 16 | 24788645  | A | T | 0.1934 | -0.3197 | 0.0379 | 3.53E-17  | Yes | No  |
| rs6565174   | 16 | 30111904  | A | C | 0.1121 | -0.2882 | 0.0484 | 2.57E-09  | Yes | No  |
| rs72799341  | 16 | 30936743  | A | G | 0.2399 | 0.057   | 0.0354 | 0.1072    | Yes | No  |
| rs10468291  | 16 | 49768046  | A | C | 0.5688 | -0.1868 | 0.0305 | 9.38E-10  | Yes | No  |
| rs34941092  | 16 | 50550137  | A | G | 0.1498 | -0.3225 | 0.0425 | 3.23E-14  | Yes | No  |
| rs9932220   | 16 | 51758116  | A | G | 0.2177 | -0.229  | 0.0364 | 3.18E-10  | Yes | No  |
| rs37060     | 16 | 58566304  | A | G | 0.2467 | 0.1103  | 0.0347 | 0.0015    | Yes | No  |
| rs28633979  | 16 | 65282820  | A | C | 0.4303 | -0.1794 | 0.0302 | 2.97E-09  | Yes | No  |
| rs45474499  | 16 | 66914492  | T | C | 0.0474 | 0.4432  | 0.0717 | 6.41E-10  | Yes | No  |
| rs7185555   | 16 | 69131281  | C | G | 0.1526 | -0.0131 | 0.0422 | 0.7557    | Yes | No  |
| rs33063     | 16 | 69640217  | A | G | 0.1482 | 0.2244  | 0.0424 | 1.20E-07  | Yes | No  |
| rs62053102  | 16 | 71654365  | A | T | 0.953  | -0.5691 | 0.0751 | 3.41E-14  | Yes | No  |
| rs1012089   | 16 | 74171973  | C | G | 0.4752 | -0.192  | 0.0302 | 1.95E-10  | No  | No  |
| rs35261357  | 16 | 75444572  | T | C | 0.585  | 0.3502  | 0.0307 | 4.43E-30  | Yes | No  |
| rs56844452  | 16 | 80864776  | T | C | 0.0708 | -0.4506 | 0.0596 | 3.97E-14  | Yes | No  |
| rs8059962   | 16 | 81574197  | T | C | 0.4214 | -0.197  | 0.0307 | 1.46E-10  | Yes | No  |
| rs7500448   | 16 | 83045790  | A | G | 0.7467 | 0.2227  | 0.035  | 1.98E-10  | Yes | No  |
| rs7187540   | 16 | 85318302  | A | C | 0.3351 | -0.1951 | 0.0341 | 1.02E-08  | No  | No  |
| rs3851018   | 16 | 86437811  | C | G | 0.5693 | 0.1918  | 0.0309 | 5.40E-10  | No  | No  |
| rs6540125   | 16 | 87993889  | T | G | 0.3411 | 0.2042  | 0.0317 | 1.21E-10  | Yes | No  |
| rs1126464   | 16 | 89704365  | C | G | 0.2428 | 0.1285  | 0.036  | 0.0003654 | Yes | No  |
| rs12941318  | 17 | 1333598   | T | C | 0.4955 | -0.2351 | 0.0309 | 2.74E-14  | Yes | No  |
| rs4480845   | 17 | 1958609   | T | C | 0.3652 | 0.3156  | 0.0316 | 1.85E-23  | Yes | No  |
| rs7215084   | 17 | 3880148   | T | C | 0.5127 | 0.095   | 0.03   | 0.001537  | Yes | No  |
| rs28427409  | 17 | 6473882   | T | C | 0.4169 | 0.2187  | 0.0306 | 8.84E-13  | Yes | No  |
| rs78378222  | 17 | 7571752   | T | G | 0.9859 | 0.4549  | 0.1384 | 0.001017  | Yes | No  |
| rs8069739   | 17 | 8078765   | T | C | 0.3217 | -0.1594 | 0.0321 | 6.80E-07  | Yes | No  |
| rs4925159   | 17 | 18185510  | A | G | 0.4246 | 0.2174  | 0.0305 | 9.66E-13  | Yes | Yes |
| rs7502046   | 17 | 19196440  | T | C | 0.8103 | 0.1769  | 0.0389 | 5.46E-06  | Yes | No  |
| rs138285687 | 17 | 27195674  | T | C | 0.0431 | -0.3474 | 0.076  | 4.81E-06  | No  | No  |
| rs11080134  | 17 | 29161503  | A | G | 0.6432 | -0.1682 | 0.032  | 1.46E-07  | Yes | Yes |
| rs1551355   | 17 | 30032420  | T | C | 0.2334 | 0.2098  | 0.0356 | 3.89E-09  | Yes | Yes |
| rs9899540   | 17 | 30777924  | A | T | 0.3999 | 0.2011  | 0.0316 | 1.87E-10  | Yes | No  |
| rs3135967   | 17 | 33313729  | A | G | 0.5238 | 0.0642  | 0.03   | 0.03248   | Yes | No  |
| rs79089478  | 17 | 40317241  | T | C | 0.9726 | 0.3327  | 0.0946 | 0.0004378 | Yes | No  |
| rs56228409  | 17 | 40919596  | A | C | 0.8461 | -0.1854 | 0.0438 | 2.36E-05  | Yes | No  |
| rs9904409   | 17 | 42680402  | A | G | 0.0974 | 0.3682  | 0.0508 | 4.20E-13  | Yes | No  |
| rs12946454  | 17 | 43208121  | A | T | 0.7348 | -0.4125 | 0.0341 | 1.01E-33  | Yes | Yes |
| rs115231027 | 17 | 44199290  | T | C | 0.8216 | -0.2968 | 0.0418 | 1.23E-12  | No  | No  |
| rs17608766  | 17 | 45013271  | T | C | 0.8555 | -0.6903 | 0.0433 | 2.48E-57  | Yes | No  |
| rs62076103  | 17 | 45888374  | A | G | 0.9312 | -0.5803 | 0.0604 | 7.91E-22  | Yes | No  |
| rs7406910   | 17 | 46688256  | T | C | 0.0884 | -0.4347 | 0.0533 | 3.39E-16  | Yes | Yes |
| rs12940887  | 17 | 47402807  | T | C | 0.3671 | 0.2597  | 0.0312 | 8.03E-17  | Yes | No  |
| rs12325702  | 17 | 55446364  | A | T | 0.4433 | 0.1263  | 0.0307 | 3.78E-05  | No  | No  |
| rs34430710  | 17 | 56876627  | A | T | 0.6763 | -0.2116 | 0.0322 | 5.02E-11  | Yes | No  |
| rs2645466   | 17 | 57853214  | A | C | 0.7045 | -0.1603 | 0.0329 | 1.08E-06  | Yes | No  |
| rs1036902   | 17 | 58950791  | T | C | 0.8469 | -0.2543 | 0.0422 | 1.70E-09  | Yes | No  |
| rs2240736   | 17 | 59485393  | T | C | 0.7344 | 0.4088  | 0.0343 | 1.17E-32  | Yes | Yes |
| rs740698    | 17 | 60767151  | T | C | 0.5651 | -0.2104 | 0.0308 | 8.48E-12  | Yes | No  |
| rs4308      | 17 | 61559625  | A | G | 0.3777 | 0.2731  | 0.0314 | 3.11E-18  | Yes | No  |
| rs6504213   | 17 | 62381714  | T | C | 0.4182 | -0.2982 | 0.0312 | 1.25E-21  | Yes | No  |

|             |    |          |   |   |        |         |        |           |     |     |
|-------------|----|----------|---|---|--------|---------|--------|-----------|-----|-----|
| rs112260610 | 17 | 64252393 | T | C | 0.1403 | 0.2588  | 0.0435 | 2.69E-09  | Yes | No  |
| rs2467099   | 17 | 73949045 | T | C | 0.2232 | -0.2462 | 0.036  | 8.26E-12  | Yes | No  |
| rs35504735  | 17 | 74686809 | A | G | 0.5576 | 0.024   | 0.0302 | 0.4261    | Yes | No  |
| rs57927100  | 17 | 75317300 | C | G | 0.7371 | 0.3149  | 0.0347 | 1.13E-19  | Yes | No  |
| rs9302885   | 17 | 76799898 | A | G | 0.4452 | 0.2242  | 0.0302 | 1.03E-13  | Yes | Yes |
| rs112280096 | 17 | 79367409 | A | C | 0.3624 | -0.203  | 0.0335 | 1.33E-09  | No  | No  |
| rs34413141  | 18 | 777282   | A | T | 0.1822 | -0.3531 | 0.0393 | 2.47E-19  | Yes | No  |
| rs11665020  | 18 | 10879503 | C | G | 0.3211 | -0.1304 | 0.0324 | 5.87E-05  | Yes | No  |
| rs963920    | 18 | 12711052 | T | G | 0.675  | -0.1022 | 0.0321 | 0.001435  | Yes | No  |
| rs4800420   | 18 | 20158965 | A | G | 0.2923 | 0.0936  | 0.0332 | 0.0048    | Yes | No  |
| rs1154214   | 18 | 24546824 | T | G | 0.3963 | -0.2031 | 0.0306 | 3.27E-11  | Yes | No  |
| rs10164193  | 18 | 31161426 | T | G | 0.9221 | -0.2782 | 0.0566 | 8.93E-07  | Yes | No  |
| rs61735998  | 18 | 34289285 | T | G | 0.0241 | 0.5567  | 0.1033 | 7.01E-08  | Yes | No  |
| rs12958173  | 18 | 42141977 | A | C | 0.297  | 0.295   | 0.0329 | 2.97E-19  | Yes | Yes |
| rs7236548   | 18 | 43097750 | A | C | 0.1848 | 0.3431  | 0.0388 | 8.51E-19  | Yes | No  |
| rs745821    | 18 | 48142854 | T | G | 0.7548 | 0.2214  | 0.0351 | 2.80E-10  | Yes | No  |
| rs36010659  | 18 | 48283949 | T | C | 0.8586 | 0.2912  | 0.0432 | 1.55E-11  | Yes | No  |
| rs11876341  | 18 | 48799991 | A | G | 0.6919 | -0.213  | 0.0334 | 1.82E-10  | Yes | No  |
| rs34163044  | 18 | 51851616 | A | C | 0.4199 | 0.1753  | 0.031  | 1.59E-08  | Yes | No  |
| rs72930904  | 18 | 52607301 | T | C | 0.1597 | -0.2316 | 0.041  | 1.57E-08  | Yes | No  |
| rs12605156  | 18 | 53498114 | A | T | 0.8081 | 0.2044  | 0.0383 | 9.60E-08  | Yes | No  |
| rs10048404  | 18 | 54578482 | T | C | 0.3701 | -0.2607 | 0.0317 | 1.91E-16  | No  | No  |
| rs7235890   | 18 | 55732115 | T | G | 0.8957 | -0.2125 | 0.0498 | 2.01E-05  | Yes | No  |
| rs6567160   | 18 | 57829135 | T | C | 0.7661 | 0.2242  | 0.0357 | 3.33E-10  | Yes | No  |
| rs12172847  | 18 | 60223017 | A | G | 0.3229 | -0.1436 | 0.032  | 7.22E-06  | Yes | No  |
| rs12454712  | 18 | 60845884 | T | C | 0.6229 | 0.1908  | 0.0328 | 5.82E-09  | No  | No  |
| rs10460108  | 18 | 73034151 | A | G | 0.4801 | 0.2141  | 0.0301 | 1.12E-12  | Yes | No  |
| rs1047922   | 18 | 74070562 | T | C | 0.8486 | -0.1923 | 0.0437 | 1.10E-05  | No  | No  |
| rs7250835   | 19 | 670234   | T | C | 0.1648 | 0.2067  | 0.0428 | 1.40E-06  | Yes | No  |
| rs3760994   | 19 | 1435771  | A | G | 0.4915 | -0.1787 | 0.032  | 2.29E-08  | No  | No  |
| rs740406    | 19 | 2232221  | A | G | 0.9401 | -0.5905 | 0.0659 | 3.25E-19  | Yes | No  |
| rs2656523   | 19 | 4085896  | C | G | 0.7735 | 0.1398  | 0.037  | 0.0001607 | Yes | No  |
| rs2613765   | 19 | 5066330  | A | G | 0.4747 | -0.2353 | 0.0301 | 5.32E-15  | Yes | No  |
| rs7248104   | 19 | 7224431  | A | G | 0.4124 | -0.2326 | 0.0306 | 2.74E-14  | Yes | No  |
| rs4247374   | 19 | 7252756  | T | C | 0.1394 | -0.6354 | 0.0456 | 4.52E-44  | No  | No  |
| rs2009733   | 19 | 8398714  | A | G | 0.4999 | 0.1148  | 0.0306 | 0.0001758 | Yes | No  |
| rs10409243  | 19 | 10332988 | T | C | 0.5904 | -0.3077 | 0.0313 | 8.10E-23  | Yes | No  |
| rs1529744   | 19 | 10841472 | T | C | 0.3183 | -0.1542 | 0.0323 | 1.82E-06  | Yes | No  |
| rs167479    | 19 | 11526765 | T | G | 0.4726 | -0.5642 | 0.0327 | 7.21E-67  | No  | No  |
| rs17638167  | 19 | 11584818 | T | C | 0.0439 | -0.4519 | 0.0741 | 1.07E-09  | Yes | No  |
| rs10418305  | 19 | 15278808 | C | G | 0.0991 | -0.1619 | 0.0505 | 0.00135   | Yes | No  |
| rs3745318   | 19 | 16436262 | T | C | 0.2494 | 0.1637  | 0.0359 | 5.06E-06  | No  | No  |
| rs1077795   | 19 | 17222584 | A | G | 0.7393 | 0.2507  | 0.0344 | 3.33E-13  | Yes | No  |
| rs8111708   | 19 | 18558876 | A | G | 0.653  | 0.0644  | 0.0316 | 0.04185   | Yes | No  |
| rs2304130   | 19 | 19789528 | A | G | 0.9157 | -0.3387 | 0.0552 | 8.22E-10  | Yes | No  |
| rs6511291   | 19 | 21950402 | T | C | 0.4361 | -0.1692 | 0.0308 | 3.95E-08  | Yes | No  |
| rs62104477  | 19 | 30294991 | T | G | 0.3302 | 0.1078  | 0.0321 | 0.0007895 | Yes | No  |
| rs8105753   | 19 | 31927547 | A | C | 0.6315 | 0.2178  | 0.0318 | 6.84E-12  | No  | No  |
| rs1821295   | 19 | 32590773 | T | C | 0.6987 | -0.2253 | 0.0328 | 6.75E-12  | Yes | No  |
| rs7256564   | 19 | 33889593 | A | G | 0.3122 | 0.1955  | 0.0324 | 1.53E-09  | Yes | No  |
| rs12983238  | 19 | 39438532 | A | G | 0.3064 | -0.1293 | 0.0351 | 0.0002276 | Yes | No  |
| rs1800470   | 19 | 41858921 | A | G | 0.6236 | -0.1011 | 0.0313 | 0.00122   | Yes | No  |
| rs7412      | 19 | 45412079 | T | C | 0.0819 | -0.4339 | 0.0574 | 4.04E-14  | Yes | No  |
| rs34783010  | 19 | 46180414 | T | G | 0.1996 | 0.2208  | 0.0381 | 6.79E-09  | Yes | No  |
| rs73046792  | 19 | 49605705 | A | G | 0.1588 | -0.3554 | 0.0426 | 7.23E-17  | Yes | No  |
| rs138877676 | 19 | 50935809 | T | G | 0.0193 | -0.66   | 0.1237 | 9.53E-08  | Yes | No  |
| rs2143635   | 20 | 2793063  | T | C | 0.8996 | -0.1676 | 0.0514 | 0.001096  | Yes | No  |
| rs1764975   | 20 | 4101290  | A | T | 0.7954 | 0.2819  | 0.0379 | 1.08E-13  | Yes | No  |
| rs11087740  | 20 | 6657554  | T | C | 0.5116 | -0.1627 | 0.0303 | 7.91E-08  | Yes | No  |
| rs6108168   | 20 | 8626271  | A | C | 0.2542 | -0.2957 | 0.0344 | 8.71E-18  | Yes | No  |
| rs680515    | 20 | 10458688 | A | G | 0.3893 | -0.0876 | 0.031  | 0.004681  | Yes | No  |
| rs1327235   | 20 | 10969030 | A | G | 0.5295 | -0.426  | 0.03   | 7.88E-46  | Yes | No  |
| rs1232482   | 20 | 11886643 | T | C | 0.4015 | -0.1379 | 0.0306 | 6.42E-06  | Yes | No  |
| rs2618647   | 20 | 17882452 | A | G | 0.5055 | -0.1884 | 0.0301 | 4.01E-10  | Yes | No  |
| rs6081613   | 20 | 19465907 | A | G | 0.2744 | 0.1815  | 0.0336 | 6.58E-08  | Yes | No  |
| rs6060114   | 20 | 30169673 | T | C | 0.8416 | 0.2731  | 0.0413 | 3.79E-11  | Yes | No  |
| rs6141767   | 20 | 31225069 | C | G | 0.157  | 0.3107  | 0.0419 | 1.17E-13  | Yes | No  |
| rs13042148  | 20 | 32298286 | T | C | 0.1534 | -0.1344 | 0.0424 | 0.001506  | Yes | No  |
| rs6141479   | 20 | 33121942 | C | G | 0.1968 | 0.0997  | 0.0392 | 0.011     | Yes | No  |
| rs4811601   | 20 | 36849007 | T | C | 0.4588 | 0.0642  | 0.0306 | 0.03582   | Yes | No  |
| rs4810332   | 20 | 40268334 | A | T | 0.3792 | -0.2608 | 0.0317 | 1.92E-16  | Yes | No  |
| rs6031435   | 20 | 42797358 | A | G | 0.5398 | -0.2592 | 0.0303 | 1.09E-17  | Yes | No  |

|            |    |          |   |   |        |         |        |           |     |     |
|------------|----|----------|---|---|--------|---------|--------|-----------|-----|-----|
| rs6095241  | 20 | 47308798 | A | G | 0.4395 | -0.1718 | 0.0302 | 1.26E-08  | Yes | No  |
| rs237485   | 20 | 48004238 | A | G | 0.698  | 0.1101  | 0.0331 | 0.0008706 | Yes | No  |
| rs6021247  | 20 | 50108980 | A | G | 0.529  | 0.2328  | 0.0301 | 9.80E-15  | Yes | Yes |
| rs6015450  | 20 | 57751117 | A | G | 0.8761 | -0.7003 | 0.0461 | 3.95E-52  | Yes | No  |
| rs35213536 | 20 | 62694319 | T | G | 0.2466 | 0.2937  | 0.0357 | 1.94E-16  | Yes | No  |
| rs1882961  | 21 | 16556367 | T | C | 0.3087 | 0.2443  | 0.0326 | 6.69E-14  | Yes | Yes |
| rs11909120 | 21 | 30131872 | A | T | 0.857  | -0.0916 | 0.043  | 0.03324   | Yes | No  |
| rs11701033 | 21 | 33788341 | C | G | 0.8178 | -0.2187 | 0.0392 | 2.52E-08  | Yes | No  |
| rs9976596  | 21 | 35596842 | T | C | 0.843  | 0.097   | 0.0424 | 0.02209   | Yes | No  |
| rs62229372 | 21 | 37692507 | T | C | 0.1275 | 0.2408  | 0.047  | 2.95E-07  | Yes | No  |
| rs2277788  | 21 | 40817702 | C | G | 0.1054 | 0.2295  | 0.0489 | 2.67E-06  | Yes | No  |
| rs12627651 | 21 | 44760603 | A | G | 0.2872 | 0.3498  | 0.0341 | 1.02E-24  | Yes | No  |
| rs9306160  | 21 | 45107562 | T | C | 0.4107 | -0.2123 | 0.0309 | 6.35E-12  | Yes | No  |
| rs35796750 | 21 | 47422412 | T | C | 0.5502 | -0.1337 | 0.0305 | 1.19E-05  | Yes | No  |
| rs11701512 | 21 | 47962811 | A | G | 0.1809 | 0.1958  | 0.039  | 5.24E-07  | Yes | No  |
| rs12628032 | 22 | 19967980 | T | C | 0.3094 | 0.2445  | 0.0328 | 9.81E-14  | Yes | No  |
| rs134041   | 22 | 28056338 | T | C | 0.4358 | 0.0193  | 0.0303 | 0.5252    | Yes | No  |
| rs9608690  | 22 | 28921347 | A | G | 0.0682 | -0.3711 | 0.06   | 6.13E-10  | Yes | No  |
| rs4823006  | 22 | 29451671 | A | G | 0.5553 | 0.2172  | 0.0302 | 6.23E-13  | Yes | No  |
| rs737721   | 22 | 30172254 | C | G | 0.9478 | -0.4074 | 0.0684 | 2.62E-09  | Yes | No  |
| rs5753103  | 22 | 30768777 | A | G | 0.4519 | 0.1303  | 0.0303 | 1.74E-05  | Yes | No  |
| rs9609429  | 22 | 32517431 | T | C | 0.7243 | 0.1304  | 0.0337 | 0.0001087 | Yes | No  |
| rs5750482  | 22 | 38117943 | T | C | 0.3813 | 0.1578  | 0.031  | 3.67E-07  | Yes | No  |
| rs470113   | 22 | 40729614 | A | G | 0.8182 | -0.1849 | 0.039  | 2.07E-06  | Yes | No  |
| rs73161324 | 22 | 42038786 | T | C | 0.0562 | 0.203   | 0.0702 | 0.003837  | Yes | No  |
| rs77692990 | 22 | 50219952 | T | C | 0.0797 | -0.3178 | 0.0566 | 1.95E-08  | Yes | No  |
| rs28578714 | 22 | 50727921 | T | C | 0.6062 | 0.2066  | 0.0327 | 2.53E-10  | Yes | No  |

56 **Supplemental Table 8.** SNPs included in diastolic blood pressure-related analyses.

57

| RSID        | Chrom. | Position  | Effect allele | Other allele | Effect allele freq. | Beta    | SE     | p-value   | Used in MR | Used in MR + Steiger filt. |
|-------------|--------|-----------|---------------|--------------|---------------------|---------|--------|-----------|------------|----------------------------|
| rs2076328   | 1      | 1687482   | T             | G            | 0.49                | -0.1318 | 0.0178 | 1.33E-13  | Yes        | No                         |
| rs260508    | 1      | 2187085   | T             | G            | 0.6148              | 0.0548  | 0.0178 | 0.002125  | Yes        | No                         |
| rs2493292   | 1      | 3328659   | T             | C            | 0.144               | 0.2481  | 0.0251 | 5.54E-23  | Yes        | Yes                        |
| rs709209    | 1      | 6278414   | A             | G            | 0.6584              | -0.0357 | 0.0188 | 0.05666   | Yes        | No                         |
| rs4908678   | 1      | 7739250   | T             | C            | 0.626               | -0.1124 | 0.018  | 4.59E-10  | Yes        | Yes                        |
| rs2252865   | 1      | 8422676   | T             | C            | 0.3499              | 0.1189  | 0.0181 | 5.51E-11  | Yes        | Yes                        |
| rs9662255   | 1      | 9441949   | A             | C            | 0.4273              | -0.0041 | 0.0177 | 0.8184    | Yes        | No                         |
| rs880315    | 1      | 10796866  | T             | C            | 0.6567              | -0.2583 | 0.0185 | 1.99E-44  | Yes        | No                         |
| rs17367504  | 1      | 11862778  | A             | G            | 0.8406              | 0.511   | 0.0237 | 3.55E-103 | Yes        | No                         |
| rs3820068   | 1      | 15798197  | A             | G            | 0.8042              | 0.0953  | 0.0221 | 1.65E-05  | Yes        | No                         |
| rs2807337   | 1      | 22577371  | T             | C            | 0.3642              | 0.0901  | 0.018  | 5.54E-07  | Yes        | No                         |
| rs150266910 | 1      | 23442265  | T             | C            | 0.1767              | -0.0651 | 0.0226 | 0.003997  | Yes        | No                         |
| rs6686889   | 1      | 25030470  | T             | C            | 0.2533              | 0.1918  | 0.0199 | 6.95E-22  | Yes        | No                         |
| rs79598313  | 1      | 27284913  | T             | C            | 0.0251              | 0.3286  | 0.057  | 8.13E-09  | Yes        | No                         |
| rs3737801   | 1      | 27960832  | C             | G            | 0.9231              | 0.1855  | 0.0344 | 7.08E-08  | Yes        | No                         |
| rs143167197 | 1      | 28734372  | A             | G            | 0.9284              | -0.1242 | 0.0352 | 0.0004161 | Yes        | No                         |
| rs1565716   | 1      | 29549216  | A             | G            | 0.0698              | 0.2139  | 0.0341 | 3.45E-10  | Yes        | No                         |
| rs4652875   | 1      | 33868469  | C             | G            | 0.4207              | 0.0319  | 0.0175 | 0.06864   | No         | No                         |
| rs9729719   | 1      | 38298207  | A             | G            | 0.2929              | -0.0503 | 0.0193 | 0.009217  | Yes        | No                         |
| rs11210029  | 1      | 41865293  | A             | G            | 0.6325              | -0.0917 | 0.018  | 3.39E-07  | Yes        | No                         |
| rs7515635   | 1      | 42408070  | T             | C            | 0.4612              | 0.0979  | 0.0174 | 1.82E-08  | Yes        | No                         |
| rs72659998  | 1      | 43037556  | T             | C            | 0.1513              | 0.0322  | 0.0244 | 0.1872    | Yes        | No                         |
| rs839755    | 1      | 43856410  | A             | C            | 0.6146              | -0.1483 | 0.0177 | 5.22E-17  | Yes        | No                         |
| rs512083    | 1      | 46027355  | T             | C            | 0.5349              | 0.0161  | 0.0173 | 0.3525    | Yes        | No                         |
| rs12142296  | 1      | 46541679  | T             | G            | 0.8639              | -0.1643 | 0.0253 | 8.89E-11  | Yes        | No                         |
| rs4926923   | 1      | 48109225  | T             | C            | 0.9117              | 0.1918  | 0.0308 | 4.75E-10  | Yes        | Yes                        |
| rs11579440  | 1      | 49052423  | T             | C            | 0.8482              | 0.1303  | 0.0243 | 8.57E-08  | Yes        | No                         |
| rs147696085 | 1      | 51021867  | A             | G            | 0.0934              | 0.1533  | 0.0302 | 3.98E-07  | Yes        | No                         |
| rs6681713   | 1      | 51527684  | T             | G            | 0.9813              | 0.4146  | 0.0656 | 2.66E-10  | Yes        | No                         |
| rs112557609 | 1      | 56576924  | A             | G            | 0.3441              | 0.0685  | 0.0183 | 0.0001774 | Yes        | No                         |
| rs2404715   | 1      | 57008778  | T             | C            | 0.0926              | -0.0282 | 0.03   | 0.3469    | Yes        | No                         |
| rs60199046  | 1      | 59663341  | A             | G            | 0.7102              | -0.0884 | 0.019  | 3.28E-06  | Yes        | No                         |
| rs20354     | 1      | 67071356  | T             | G            | 0.1333              | -0.0072 | 0.0254 | 0.7764    | Yes        | No                         |
| rs34517439  | 1      | 78450517  | A             | C            | 0.1199              | -0.2514 | 0.0279 | 2.02E-19  | No         | No                         |
| rs12034319  | 1      | 86040107  | A             | G            | 0.2202              | -0.0095 | 0.0209 | 0.6492    | Yes        | No                         |
| rs385437    | 1      | 86822231  | A             | G            | 0.8607              | 0.0187  | 0.0251 | 0.4557    | Yes        | No                         |
| rs10923038  | 1      | 88651771  | A             | C            | 0.6175              | 0.0847  | 0.0179 | 2.32E-06  | Yes        | No                         |
| rs10922502  | 1      | 89360158  | A             | G            | 0.6269              | -0.1094 | 0.0179 | 1.10E-09  | Yes        | No                         |
| rs2065152   | 1      | 90228519  | T             | C            | 0.3574              | 0.1103  | 0.018  | 8.95E-10  | Yes        | Yes                        |
| rs17516329  | 1      | 92319781  | A             | T            | 0.6861              | -0.0376 | 0.0188 | 0.04519   | Yes        | No                         |
| rs7514579   | 1      | 94051350  | A             | C            | 0.7706              | 0.1121  | 0.0207 | 6.16E-08  | Yes        | No                         |
| rs17396055  | 1      | 94730954  | A             | G            | 0.3324              | -0.115  | 0.0184 | 4.13E-10  | Yes        | Yes                        |
| rs17030613  | 1      | 113190807 | A             | C            | 0.7905              | -0.2847 | 0.0213 | 8.22E-41  | Yes        | Yes                        |
| rs2932538   | 1      | 113216543 | A             | G            | 0.2566              | -0.2435 | 0.0198 | 8.85E-35  | Yes        | No                         |
| rs12078697  | 1      | 117015118 | C             | G            | 0.2113              | -0.1077 | 0.0213 | 4.07E-07  | Yes        | Yes                        |
| rs7553422   | 1      | 119540719 | T             | C            | 0.4118              | -0.1097 | 0.0176 | 4.17E-10  | Yes        | No                         |
| rs72704264  | 1      | 145713305 | C             | G            | 0.2172              | 0.117   | 0.0212 | 3.60E-08  | Yes        | No                         |
| rs11585169  | 1      | 150572037 | A             | T            | 0.5774              | 0.0274  | 0.0176 | 0.1202    | No         | No                         |
| rs13796     | 1      | 154245917 | T             | C            | 0.8641              | -0.1626 | 0.0257 | 2.44E-10  | Yes        | No                         |
| rs76719272  | 1      | 156129796 | T             | C            | 0.1315              | -0.1438 | 0.0264 | 4.86E-08  | Yes        | No                         |
| rs2171690   | 1      | 164740099 | T             | C            | 0.5352              | 0.1181  | 0.0174 | 1.19E-11  | Yes        | Yes                        |
| rs7524019   | 1      | 167367193 | T             | C            | 0.492               | 0.1036  | 0.0174 | 2.60E-09  | Yes        | No                         |
| rs2157597   | 1      | 169201567 | T             | C            | 0.3558              | 0.034   | 0.0181 | 0.06064   | Yes        | No                         |
| rs12405515  | 1      | 172357441 | T             | G            | 0.5702              | -0.1698 | 0.0174 | 1.92E-22  | Yes        | No                         |
| rs12118102  | 1      | 176634724 | A             | G            | 0.947               | -0.1766 | 0.0387 | 5.16E-06  | Yes        | No                         |
| rs150816167 | 1      | 179571862 | T             | C            | 0.9549              | -0.2873 | 0.0446 | 1.17E-10  | Yes        | No                         |
| rs10913934  | 1      | 180131640 | T             | G            | 0.5935              | -0.0254 | 0.0176 | 0.1503    | Yes        | No                         |
| rs1043069   | 1      | 180859368 | T             | G            | 0.6148              | 0.1123  | 0.0178 | 2.93E-10  | Yes        | No                         |
| rs41475048  | 1      | 183058452 | A             | G            | 0.7451              | -0.1233 | 0.0202 | 9.93E-10  | Yes        | No                         |
| rs4651224   | 1      | 184585182 | T             | C            | 0.4469              | 0.1102  | 0.0175 | 3.39E-10  | Yes        | No                         |
| rs12042924  | 1      | 197297417 | T             | C            | 0.5287              | -0.0604 | 0.0174 | 0.0005231 | Yes        | No                         |
| rs882624    | 1      | 201735913 | T             | C            | 0.3325              | -0.1571 | 0.0185 | 2.33E-17  | No         | No                         |
| rs33996239  | 1      | 203109801 | T             | C            | 0.0607              | -0.2513 | 0.0378 | 2.86E-11  | Yes        | No                         |
| rs4245739   | 1      | 204518842 | A             | C            | 0.7279              | 0.1591  | 0.0195 | 3.44E-16  | Yes        | No                         |

|             |   |           |   |   |        |         |        |           |     |     |
|-------------|---|-----------|---|---|--------|---------|--------|-----------|-----|-----|
| rs2629665   | 1 | 207220800 | A | C | 0.4096 | -0.1193 | 0.0177 | 1.52E-11  | Yes | No  |
| rs2761436   | 1 | 207919748 | T | C | 0.5379 | 0.0093  | 0.0173 | 0.5929    | Yes | No  |
| rs7555285   | 1 | 209970355 | C | G | 0.8012 | 0.1005  | 0.0216 | 3.21E-06  | Yes | No  |
| rs12408022  | 1 | 217718789 | T | C | 0.2588 | 0.1483  | 0.0199 | 9.60E-14  | Yes | Yes |
| rs35981664  | 1 | 218549354 | A | T | 0.6881 | -0.1606 | 0.0189 | 2.01E-17  | Yes | No  |
| rs2820443   | 1 | 219753509 | T | C | 0.7078 | -0.0308 | 0.0189 | 0.104     | Yes | No  |
| rs9431431   | 1 | 221358796 | A | G | 0.294  | -0.134  | 0.019  | 1.71E-12  | Yes | No  |
| rs73091767  | 1 | 227250775 | T | C | 0.7345 | -0.1346 | 0.0195 | 4.77E-12  | Yes | No  |
| rs2004776   | 1 | 230848702 | T | C | 0.2403 | 0.2513  | 0.0203 | 2.55E-35  | Yes | Yes |
| rs6429422   | 1 | 243472801 | T | G | 0.678  | -0.246  | 0.0185 | 3.29E-40  | Yes | Yes |
| rs4926499   | 1 | 249155909 | C | G | 0.826  | 0.1694  | 0.0248 | 9.37E-12  | No  | No  |
| rs4850047   | 2 | 3634753   | T | C | 0.1455 | -0.1244 | 0.0255 | 1.10E-06  | Yes | No  |
| rs2175337   | 2 | 9298590   | A | C | 0.6108 | -0.024  | 0.0178 | 0.1765    | Yes | No  |
| rs67720684  | 2 | 18975439  | A | C | 0.239  | 0.1014  | 0.0203 | 5.73E-07  | Yes | No  |
| rs1344653   | 2 | 19730845  | A | G | 0.4996 | 0.055   | 0.0172 | 0.001397  | Yes | No  |
| rs7255      | 2 | 20878820  | T | C | 0.453  | 0.0345  | 0.0175 | 0.04818   | Yes | No  |
| rs66774912  | 2 | 21423532  | A | G | 0.1368 | 0.0249  | 0.0253 | 0.3263    | Yes | No  |
| rs10779936  | 2 | 23950200  | A | G | 0.7134 | 0.0099  | 0.0191 | 0.6054    | Yes | No  |
| rs55701159  | 2 | 25139596  | T | G | 0.8864 | 0.2254  | 0.0275 | 2.47E-16  | Yes | No  |
| rs1275988   | 2 | 26914364  | T | C | 0.6111 | -0.2945 | 0.0177 | 1.92E-62  | Yes | No  |
| rs9678851   | 2 | 27887034  | A | C | 0.568  | -0.076  | 0.0176 | 1.49E-05  | Yes | No  |
| rs7562      | 2 | 28635740  | T | C | 0.5192 | 0.1059  | 0.0175 | 1.33E-09  | Yes | No  |
| rs1607644   | 2 | 34679626  | A | G | 0.3658 | -0.0934 | 0.0179 | 1.95E-07  | Yes | Yes |
| rs13420463  | 2 | 37517566  | A | G | 0.7725 | 0.1645  | 0.0206 | 1.60E-15  | Yes | No  |
| rs2707238   | 2 | 38094149  | C | G | 0.2839 | 0.1037  | 0.0192 | 6.81E-08  | Yes | No  |
| rs4952611   | 2 | 40567743  | T | C | 0.5795 | -0.1401 | 0.018  | 7.38E-15  | Yes | No  |
| rs11681462  | 2 | 42352567  | A | C | 0.7885 | -0.1325 | 0.0214 | 5.96E-10  | Yes | No  |
| rs76326501  | 2 | 43167878  | A | C | 0.9089 | 0.3618  | 0.0305 | 2.17E-32  | Yes | No  |
| rs35590893  | 2 | 43716933  | A | G | 0.2776 | -0.1141 | 0.0193 | 3.23E-09  | Yes | No  |
| rs11690961  | 2 | 46363336  | A | C | 0.8832 | -0.1611 | 0.0269 | 2.22E-09  | Yes | No  |
| rs6545155   | 2 | 50429861  | T | C | 0.7818 | 0.0844  | 0.0209 | 5.49E-05  | Yes | No  |
| rs10189186  | 2 | 53025757  | A | G | 0.5295 | 0.0971  | 0.0173 | 2.19E-08  | Yes | No  |
| rs2920899   | 2 | 55279681  | T | G | 0.7859 | 0.0743  | 0.0213 | 0.0004863 | Yes | No  |
| rs1975487   | 2 | 55809054  | A | G | 0.4814 | -0.141  | 0.0176 | 1.01E-15  | Yes | No  |
| rs6730325   | 2 | 59315828  | A | G | 0.6048 | -0.0231 | 0.0177 | 0.1905    | Yes | No  |
| rs72816333  | 2 | 60096560  | A | T | 0.8302 | 0.1432  | 0.023  | 4.66E-10  | Yes | No  |
| rs925484    | 2 | 60611437  | C | G | 0.5997 | -0.0233 | 0.0177 | 0.1874    | Yes | No  |
| rs7608483   | 2 | 61836235  | A | C | 0.4171 | 0.1171  | 0.0176 | 2.83E-11  | Yes | No  |
| rs13014371  | 2 | 64217786  | T | C | 0.5705 | -0.1176 | 0.0175 | 1.68E-11  | Yes | No  |
| rs2631669   | 2 | 66104881  | T | C | 0.4705 | -0.0541 | 0.0174 | 0.001831  | Yes | No  |
| rs2300481   | 2 | 66782467  | T | C | 0.3861 | 0.0853  | 0.0178 | 1.56E-06  | Yes | No  |
| rs6731373   | 2 | 68503044  | A | G | 0.3503 | 0.0718  | 0.0186 | 0.0001116 | Yes | No  |
| rs12052761  | 2 | 69065841  | A | G | 0.3938 | -0.1229 | 0.0177 | 4.22E-12  | Yes | No  |
| rs3771371   | 2 | 71627539  | T | C | 0.569  | -0.0098 | 0.0174 | 0.5742    | Yes | No  |
| rs10193543  | 2 | 72483329  | T | G | 0.8364 | 0.1391  | 0.0235 | 3.20E-09  | Yes | No  |
| rs1876487   | 2 | 73114352  | A | C | 0.2948 | -0.1099 | 0.0196 | 1.93E-08  | Yes | Yes |
| rs11689667  | 2 | 85491365  | T | C | 0.5443 | -0.0153 | 0.0174 | 0.3792    | Yes | No  |
| rs72847885  | 2 | 86326717  | A | G | 0.663  | 0.1305  | 0.0182 | 8.08E-13  | Yes | No  |
| rs2579519   | 2 | 96675166  | T | C | 0.6169 | -0.1818 | 0.018  | 4.24E-24  | Yes | Yes |
| rs4851462   | 2 | 98357163  | T | C | 0.6246 | -0.1199 | 0.0182 | 3.96E-11  | No  | No  |
| rs150194832 | 2 | 106126880 | C | G | 0.093  | -0.0675 | 0.03   | 0.02458   | Yes | No  |
| rs28377357  | 2 | 112769721 | A | G | 0.2938 | -0.1243 | 0.019  | 6.03E-11  | No  | No  |
| rs62158170  | 2 | 114082175 | A | G | 0.7834 | 0.1645  | 0.0211 | 6.63E-15  | Yes | No  |
| rs10864859  | 2 | 121440218 | T | G | 0.9163 | 0.1962  | 0.0325 | 1.52E-09  | Yes | No  |
| rs6723509   | 2 | 122000745 | T | C | 0.8612 | 0.1125  | 0.0251 | 7.49E-06  | Yes | No  |
| rs13001283  | 2 | 127183454 | A | G | 0.1596 | 0.1522  | 0.0239 | 1.92E-10  | Yes | No  |
| rs4954192   | 2 | 135632981 | T | C | 0.3872 | -0.1225 | 0.0179 | 8.15E-12  | Yes | No  |
| rs72844590  | 2 | 138421227 | T | G | 0.1508 | 0.113   | 0.0247 | 4.61E-06  | Yes | No  |
| rs7606205   | 2 | 144146311 | A | C | 0.7027 | -0.1276 | 0.0191 | 2.36E-11  | Yes | No  |
| rs1438896   | 2 | 145646072 | T | C | 0.2981 | 0.195   | 0.0189 | 4.56E-25  | Yes | Yes |
| rs34570306  | 2 | 146272860 | T | C | 0.5275 | -0.1197 | 0.0177 | 1.19E-11  | Yes | No  |
| rs62169544  | 2 | 146950908 | A | G | 0.4429 | -0.1207 | 0.0175 | 4.96E-12  | Yes | No  |
| rs12990959  | 2 | 148572160 | T | C | 0.6875 | -0.1271 | 0.0187 | 1.11E-11  | Yes | Yes |
| rs4664080   | 2 | 152978341 | A | G | 0.3978 | -0.0129 | 0.0177 | 0.4664    | Yes | No  |
| rs3175      | 2 | 153618773 | A | G | 0.6523 | 0.0329  | 0.0186 | 0.07645   | Yes | No  |
| rs1220128   | 2 | 158499902 | C | G | 0.852  | 0.1917  | 0.0246 | 6.16E-15  | Yes | Yes |
| rs79523138  | 2 | 161368213 | A | G | 0.8799 | -0.1232 | 0.0271 | 5.30E-06  | Yes | No  |
| rs55732192  | 2 | 162278233 | T | G | 0.0944 | -0.1417 | 0.0299 | 2.12E-06  | Yes | No  |
| rs1446468   | 2 | 164963486 | T | C | 0.454  | -0.253  | 0.0174 | 1.21E-47  | Yes | No  |
| rs6712203   | 2 | 165557318 | T | C | 0.3719 | -0.1117 | 0.018  | 5.22E-10  | Yes | No  |
| rs2390258   | 2 | 166250129 | A | G | 0.3074 | -0.0998 | 0.0188 | 1.08E-07  | Yes | Yes |
| rs560887    | 2 | 169763148 | T | C | 0.2986 | 0.0482  | 0.0189 | 0.01069   | Yes | No  |

|             |   |           |   |   |        |         |        |           |     |     |
|-------------|---|-----------|---|---|--------|---------|--------|-----------|-----|-----|
| rs151054210 | 2 | 172381487 | A | G | 0.1829 | 0.0136  | 0.0224 | 0.5423    | Yes | No  |
| rs6758859   | 2 | 173965056 | T | C | 0.6355 | 0.1211  | 0.0179 | 1.45E-11  | Yes | Yes |
| rs11694601  | 2 | 174949358 | A | G | 0.5969 | -0.0889 | 0.0177 | 5.33E-07  | Yes | No  |
| rs72914576  | 2 | 175529967 | C | G | 0.8105 | -0.0626 | 0.0223 | 0.00491   | Yes | No  |
| rs60148403  | 2 | 177989414 | A | T | 0.1955 | -0.0391 | 0.0221 | 0.07618   | Yes | No  |
| rs1837164   | 2 | 178716601 | A | T | 0.369  | 0.0677  | 0.0179 | 0.0001524 | Yes | No  |
| rs79146658  | 2 | 179786068 | T | C | 0.9145 | -0.3344 | 0.0312 | 7.85E-27  | Yes | No  |
| rs1486236   | 2 | 180739450 | A | C | 0.3703 | -0.0751 | 0.0184 | 4.33E-05  | Yes | No  |
| rs10184839  | 2 | 181946115 | A | T | 0.2917 | -0.1398 | 0.019  | 2.09E-13  | Yes | Yes |
| rs16823124  | 2 | 183224127 | A | G | 0.3069 | 0.2276  | 0.0187 | 4.06E-34  | Yes | Yes |
| rs12473688  | 2 | 185033470 | A | G | 0.284  | 0.0847  | 0.0191 | 9.69E-06  | Yes | No  |
| rs28558491  | 2 | 187816321 | T | C | 0.7335 | -0.1074 | 0.0197 | 4.83E-08  | Yes | No  |
| rs11901929  | 2 | 189643316 | A | G | 0.3471 | -0.0433 | 0.0182 | 0.01739   | Yes | No  |
| rs7592578   | 2 | 191439591 | T | G | 0.1938 | -0.1998 | 0.0224 | 4.71E-19  | Yes | No  |
| rs296797    | 2 | 201102905 | T | C | 0.4048 | 0.0682  | 0.0177 | 0.0001113 | Yes | No  |
| rs1469760   | 2 | 204125426 | T | C | 0.5834 | -0.0633 | 0.0176 | 0.000317  | Yes | No  |
| rs2162003   | 2 | 205077128 | T | C | 0.6048 | 0.1279  | 0.0183 | 3.20E-12  | No  | No  |
| rs1263671   | 2 | 207996447 | T | C | 0.8368 | -0.1394 | 0.0238 | 4.69E-09  | Yes | Yes |
| rs55780018  | 2 | 208526140 | T | C | 0.5442 | -0.1334 | 0.0177 | 5.29E-14  | Yes | No  |
| rs1047891   | 2 | 211540507 | A | C | 0.319  | -0.1405 | 0.0188 | 8.19E-14  | Yes | No  |
| rs12694277  | 2 | 213188795 | T | C | 0.2951 | -0.0866 | 0.0192 | 6.76E-06  | Yes | No  |
| rs4674114   | 2 | 217659266 | A | G | 0.2004 | 0.0224  | 0.0216 | 0.2994    | Yes | No  |
| rs1063281   | 2 | 218668732 | T | C | 0.6027 | -0.1623 | 0.0179 | 1.21E-19  | Yes | Yes |
| rs1996992   | 2 | 219651349 | T | G | 0.0516 | -0.2967 | 0.0394 | 4.71E-14  | Yes | Yes |
| rs12474050  | 2 | 220362557 | T | C | 0.3431 | 0.1142  | 0.0182 | 3.80E-10  | Yes | No  |
| rs2972146   | 2 | 227100698 | T | G | 0.6431 | 0.1326  | 0.018  | 1.73E-13  | Yes | No  |
| rs1044822   | 2 | 230629138 | T | C | 0.1488 | -0.1334 | 0.0243 | 4.14E-08  | Yes | No  |
| rs12052878  | 2 | 238227594 | A | G | 0.319  | 0.0284  | 0.0186 | 0.1273    | Yes | No  |
| rs4507125   | 2 | 239864732 | A | C | 0.7864 | -0.1244 | 0.0211 | 3.60E-09  | Yes | Yes |
| rs139354822 | 2 | 242344695 | T | C | 0.9706 | 0.2612  | 0.0557 | 2.76E-06  | Yes | No  |
| rs9865843   | 3 | 7489993   | A | G | 0.5165 | -0.0923 | 0.0177 | 1.73E-07  | Yes | No  |
| rs347591    | 3 | 11290122  | T | G | 0.6628 | 0.1347  | 0.0184 | 2.20E-13  | Yes | No  |
| rs729639    | 3 | 13826854  | T | C | 0.3452 | 0.0196  | 0.0183 | 0.2836    | Yes | No  |
| rs11128722  | 3 | 14958126  | A | G | 0.5704 | -0.1345 | 0.0178 | 3.82E-14  | Yes | No  |
| rs189267552 | 3 | 20073193  | A | T | 0.0131 | -0.0965 | 0.0797 | 0.2261    | Yes | No  |
| rs4634143   | 3 | 23163749  | T | C | 0.2996 | 0.1161  | 0.0189 | 7.89E-10  | Yes | No  |
| rs13082711  | 3 | 27537909  | T | C | 0.7607 | -0.1778 | 0.0203 | 1.70E-18  | Yes | Yes |
| rs72851229  | 3 | 29374219  | C | G | 0.1745 | -0.1364 | 0.0231 | 3.63E-09  | Yes | No  |
| rs12638085  | 3 | 30405936  | A | T | 0.3565 | 0.0976  | 0.0182 | 8.55E-08  | Yes | No  |
| rs4678915   | 3 | 36964583  | A | G | 0.4313 | 0.0214  | 0.0178 | 0.2287    | Yes | No  |
| rs267517    | 3 | 37539090  | A | G | 0.5927 | -0.1052 | 0.0179 | 4.35E-09  | Yes | No  |
| rs6801957   | 3 | 38767315  | T | C | 0.4099 | -0.0428 | 0.0176 | 0.01493   | Yes | No  |
| rs6788984   | 3 | 41107173  | A | G | 0.8562 | 0.1143  | 0.0248 | 3.92E-06  | Yes | No  |
| rs9815354   | 3 | 41912651  | A | G | 0.163  | 0.3216  | 0.0237 | 5.26E-42  | Yes | No  |
| rs141979279 | 3 | 44858131  | T | C | 0.9511 | 0.046   | 0.0402 | 0.2522    | Yes | No  |
| rs113134141 | 3 | 46861939  | A | G | 0.8983 | -0.1608 | 0.0288 | 2.50E-08  | Yes | No  |
| rs6797587   | 3 | 48197614  | A | G | 0.3285 | -0.2378 | 0.0185 | 6.56E-38  | Yes | Yes |
| rs73082337  | 3 | 49009570  | C | G | 0.8792 | 0.1482  | 0.0275 | 7.12E-08  | Yes | No  |
| rs36022378  | 3 | 49913705  | T | C | 0.7997 | -0.1765 | 0.0219 | 8.60E-16  | Yes | No  |
| rs13303     | 3 | 52558008  | T | C | 0.4368 | 0.0397  | 0.0176 | 0.02382   | Yes | No  |
| rs9810888   | 3 | 53635595  | T | G | 0.4981 | -0.1151 | 0.0175 | 4.38E-11  | Yes | No  |
| rs9827472   | 3 | 56726646  | T | C | 0.3649 | -0.133  | 0.0181 | 1.75E-13  | No  | No  |
| rs12486605  | 3 | 57706503  | T | C | 0.5725 | -0.1508 | 0.0176 | 1.01E-17  | Yes | No  |
| rs3774702   | 3 | 63856870  | A | G | 0.1768 | 0.147   | 0.0228 | 1.18E-10  | Yes | Yes |
| rs918466    | 3 | 64710253  | A | G | 0.4092 | -0.1402 | 0.0177 | 2.67E-15  | Yes | Yes |
| rs7630745   | 3 | 66427029  | T | C | 0.6586 | 0.007   | 0.0182 | 0.701     | Yes | No  |
| rs4499560   | 3 | 70920485  | A | T | 0.3167 | -0.1141 | 0.0187 | 1.05E-09  | Yes | No  |
| rs729448    | 3 | 73260545  | A | G | 0.5482 | 0.0077  | 0.0174 | 0.6575    | Yes | No  |
| rs9857362   | 3 | 74710462  | A | C | 0.5296 | 0.0948  | 0.0175 | 6.30E-08  | Yes | No  |
| rs1375564   | 3 | 85656311  | T | C | 0.6395 | 0.1133  | 0.0181 | 3.71E-10  | Yes | No  |
| rs9860290   | 3 | 99839106  | A | G | 0.21   | 0.0356  | 0.0212 | 0.09373   | Yes | No  |
| rs11923667  | 3 | 101268080 | A | T | 0.4071 | 0.1175  | 0.0177 | 3.10E-11  | No  | No  |
| rs28675079  | 3 | 111500002 | A | G | 0.1867 | -0.1444 | 0.0222 | 8.34E-11  | Yes | No  |
| rs1882289   | 3 | 114461208 | A | G | 0.8852 | -0.0188 | 0.0271 | 0.487     | Yes | No  |
| rs6806529   | 3 | 123049938 | A | C | 0.4341 | 0.0459  | 0.0177 | 0.009416  | Yes | No  |
| rs6438857   | 3 | 124557643 | T | C | 0.5779 | 0.1492  | 0.0175 | 1.50E-17  | Yes | No  |
| rs62270945  | 3 | 128201889 | T | C | 0.0291 | -0.111  | 0.0545 | 0.04159   | Yes | No  |
| rs9875380   | 3 | 132780356 | T | C | 0.4647 | -0.0925 | 0.0173 | 9.29E-08  | Yes | No  |
| rs6783086   | 3 | 133959552 | T | C | 0.3944 | 0.1744  | 0.0177 | 6.26E-23  | Yes | No  |
| rs590198    | 3 | 135953729 | A | G | 0.5279 | 0.0863  | 0.0173 | 5.83E-07  | Yes | No  |
| rs2306374   | 3 | 138119952 | T | C | 0.838  | -0.1774 | 0.0236 | 5.24E-14  | Yes | No  |
| rs16851397  | 3 | 141134818 | A | G | 0.9531 | -0.3942 | 0.0415 | 2.04E-21  | Yes | No  |

|             |   |           |   |   |        |         |        |           |     |     |
|-------------|---|-----------|---|---|--------|---------|--------|-----------|-----|-----|
| rs62278541  | 3 | 142631909 | A | G | 0.6474 | -0.0391 | 0.0181 | 0.03051   | Yes | No  |
| rs6772704   | 3 | 149524692 | A | C | 0.6837 | 0.014   | 0.0186 | 0.4513    | Yes | No  |
| rs73158427  | 3 | 153721493 | A | T | 0.1617 | 0.1801  | 0.0235 | 1.76E-14  | Yes | No  |
| rs143112823 | 3 | 154707967 | A | G | 0.0883 | -0.2246 | 0.0317 | 1.42E-12  | Yes | No  |
| rs9833313   | 3 | 157576791 | A | T | 0.242  | -0.0707 | 0.0204 | 0.0005172 | Yes | No  |
| rs78151625  | 3 | 158316726 | T | C | 0.8342 | -0.1869 | 0.0233 | 1.04E-15  | Yes | No  |
| rs419076    | 3 | 169100886 | T | C | 0.4729 | 0.2755  | 0.0173 | 2.66E-57  | Yes | Yes |
| rs4894535   | 3 | 171995605 | T | C | 0.1602 | 0.0142  | 0.0237 | 0.5489    | Yes | No  |
| rs73171158  | 3 | 176927949 | T | C | 0.4674 | -0.0594 | 0.0183 | 0.001176  | No  | No  |
| rs7611674   | 3 | 179169230 | T | G | 0.8038 | 0.1576  | 0.0223 | 1.67E-12  | Yes | No  |
| rs262986    | 3 | 183435713 | A | G | 0.4693 | -0.0997 | 0.0175 | 1.15E-08  | Yes | No  |
| rs12374077  | 3 | 185317674 | C | G | 0.344  | 0.1748  | 0.0182 | 8.05E-22  | Yes | No  |
| rs1706003   | 3 | 194299967 | T | G | 0.4675 | 0.1243  | 0.0181 | 5.77E-12  | No  | No  |
| rs6777317   | 3 | 197070959 | A | G | 0.2899 | 0.1249  | 0.0195 | 1.51E-10  | No  | No  |
| rs1250129   | 4 | 1254930   | A | G | 0.1152 | 0.0054  | 0.0272 | 0.8428    | Yes | No  |
| rs55829085  | 4 | 2165493   | A | C | 0.9547 | -0.2823 | 0.0425 | 3.03E-11  | Yes | No  |
| rs231708    | 4 | 2694773   | C | G | 0.6918 | -0.0652 | 0.0187 | 0.0004932 | Yes | No  |
| rs2498323   | 4 | 3451109   | A | G | 0.0982 | 0.0194  | 0.0296 | 0.5113    | Yes | No  |
| rs3822239   | 4 | 10095539  | A | T | 0.6966 | 0.0247  | 0.0188 | 0.1897    | Yes | No  |
| rs13122790  | 4 | 15356795  | A | G | 0.7315 | -0.0106 | 0.0196 | 0.5874    | Yes | No  |
| rs11730129  | 4 | 16032948  | T | C | 0.2184 | 0.0777  | 0.021  | 0.0002225 | Yes | No  |
| rs2610990   | 4 | 18008232  | A | G | 0.2642 | -0.1296 | 0.0197 | 4.84E-11  | Yes | No  |
| rs28667801  | 4 | 26785356  | A | T | 0.593  | -0.1622 | 0.018  | 1.90E-19  | No  | No  |
| rs1878825   | 4 | 36091370  | C | G | 0.6424 | -0.1072 | 0.0183 | 4.62E-09  | Yes | Yes |
| rs2291435   | 4 | 38387395  | T | C | 0.534  | -0.1275 | 0.0174 | 2.12E-13  | Yes | No  |
| rs12511987  | 4 | 46595623  | T | G | 0.8228 | -0.122  | 0.0229 | 9.83E-08  | Yes | No  |
| rs871606    | 4 | 54799245  | T | C | 0.895  | -0.1844 | 0.0284 | 8.56E-11  | Yes | No  |
| rs1718845   | 4 | 57943153  | A | G | 0.2982 | -0.0982 | 0.019  | 2.33E-07  | Yes | No  |
| rs6551716   | 4 | 63575696  | A | T | 0.856  | 0.1478  | 0.0251 | 3.91E-09  | Yes | Yes |
| rs10008637  | 4 | 77414144  | T | C | 0.5405 | 0.0801  | 0.0173 | 3.79E-06  | Yes | No  |
| rs1458038   | 4 | 81164723  | T | C | 0.294  | 0.491   | 0.0191 | 5.46E-146 | Yes | No  |
| rs6823199   | 4 | 83925895  | T | C | 0.743  | 0.0521  | 0.0199 | 0.008919  | Yes | No  |
| rs2014912   | 4 | 86715670  | T | C | 0.1531 | 0.1488  | 0.0241 | 6.62E-10  | Yes | No  |
| rs13149209  | 4 | 89750668  | T | C | 0.7781 | 0.1116  | 0.0211 | 1.19E-07  | Yes | No  |
| rs7694000   | 4 | 95324968  | A | T | 0.5387 | -0.0965 | 0.0175 | 3.47E-08  | No  | No  |
| rs1347345   | 4 | 95938386  | A | G | 0.6175 | -0.0915 | 0.0179 | 3.19E-07  | Yes | No  |
| rs17248480  | 4 | 102435265 | A | G | 0.0284 | -0.5177 | 0.0552 | 6.61E-21  | Yes | Yes |
| rs13107325  | 4 | 103188709 | T | C | 0.0742 | -0.6747 | 0.0339 | 3.72E-88  | Yes | No  |
| rs223361    | 4 | 103769304 | T | C | 0.6659 | 0.1698  | 0.0184 | 2.70E-20  | Yes | Yes |
| rs4699165   | 4 | 106109381 | A | G | 0.3572 | -0.0313 | 0.0181 | 0.08352   | Yes | No  |
| rs13112725  | 4 | 106911742 | C | G | 0.763  | 0.2283  | 0.0205 | 1.01E-28  | Yes | No  |
| rs7694643   | 4 | 109017528 | A | G | 0.6443 | -0.1318 | 0.0181 | 3.07E-13  | Yes | No  |
| rs6825911   | 4 | 111381638 | T | C | 0.7924 | -0.202  | 0.0215 | 6.94E-21  | Yes | Yes |
| rs4834735   | 4 | 119958809 | T | C | 0.1367 | 0.1511  | 0.0254 | 2.64E-09  | Yes | Yes |
| rs66887589  | 4 | 120509279 | T | C | 0.5221 | -0.161  | 0.0174 | 1.83E-20  | Yes | No  |
| rs3097937   | 4 | 124794644 | A | T | 0.8022 | 0.1138  | 0.0218 | 1.82E-07  | Yes | No  |
| rs7439567   | 4 | 138464842 | T | C | 0.4105 | 0.1364  | 0.0178 | 1.62E-14  | Yes | No  |
| rs72719160  | 4 | 144051276 | A | T | 0.6827 | -0.127  | 0.0186 | 8.34E-12  | Yes | No  |
| rs4292285   | 4 | 145271954 | A | T | 0.4021 | -0.1073 | 0.0177 | 1.28E-09  | Yes | No  |
| rs4835266   | 4 | 146821725 | T | C | 0.5209 | 0.0561  | 0.0177 | 0.001553  | Yes | No  |
| rs10305838  | 4 | 148400256 | T | C | 0.8594 | -0.002  | 0.0248 | 0.9357    | Yes | No  |
| rs6823767   | 4 | 151295085 | T | C | 0.7221 | -0.1021 | 0.0195 | 1.74E-07  | Yes | No  |
| rs13139571  | 4 | 156645513 | A | C | 0.2366 | -0.2408 | 0.0203 | 2.29E-32  | Yes | Yes |
| rs17035181  | 4 | 157678511 | T | G | 0.8553 | 0.153   | 0.0246 | 5.21E-10  | Yes | No  |
| rs869396    | 4 | 169688000 | A | C | 0.4653 | 0.0136  | 0.0175 | 0.4377    | Yes | No  |
| rs4957026   | 5 | 361148    | A | G | 0.3392 | 0.0947  | 0.0185 | 3.08E-07  | Yes | No  |
| rs10069690  | 5 | 1279790   | T | C | 0.2581 | 0.1615  | 0.021  | 1.42E-14  | Yes | No  |
| rs954767    | 5 | 3706050   | A | C | 0.7405 | -0.1496 | 0.0198 | 4.24E-14  | Yes | Yes |
| rs1173771   | 5 | 32815028  | A | G | 0.3985 | -0.3021 | 0.0177 | 1.16E-05  | Yes | No  |
| rs74774746  | 5 | 33411769  | C | G | 0.2611 | -0.0962 | 0.0201 | 1.62E-06  | Yes | No  |
| rs7710854   | 5 | 43824677  | A | G | 0.8836 | 0.0359  | 0.0274 | 0.19      | Yes | No  |
| rs6867399   | 5 | 52135543  | A | C | 0.2685 | 0.0043  | 0.0204 | 0.8317    | Yes | No  |
| rs1694068   | 5 | 53283630  | A | T | 0.6143 | 0.1287  | 0.0178 | 4.98E-13  | Yes | No  |
| rs13179413  | 5 | 55868097  | T | C | 0.2824 | 0.125   | 0.0198 | 3.04E-10  | Yes | No  |
| rs12515541  | 5 | 57095011  | T | G | 0.6072 | 0.1156  | 0.0177 | 6.23E-11  | Yes | No  |
| rs1848510   | 5 | 57754005  | A | G | 0.3623 | 0.1256  | 0.0181 | 4.10E-12  | Yes | No  |
| rs10062049  | 5 | 61553881  | T | C | 0.1359 | 0.2208  | 0.0255 | 4.50E-18  | Yes | Yes |
| rs6875372   | 5 | 64079015  | A | T | 0.5154 | 0.0652  | 0.0174 | 0.000175  | No  | No  |
| rs3121685   | 5 | 65662133  | T | C | 0.4843 | -0.0678 | 0.0173 | 9.18E-05  | Yes | No  |
| rs4286632   | 5 | 66291370  | A | G | 0.7294 | 0.118   | 0.0196 | 1.88E-09  | Yes | No  |
| rs246973    | 5 | 68007803  | T | C | 0.2887 | 0.1167  | 0.0192 | 1.28E-09  | Yes | No  |
| rs72761109  | 5 | 71506529  | T | C | 0.3036 | -0.0039 | 0.0188 | 0.8369    | Yes | No  |

|             |   |           |   |   |        |         |        |           |     |     |
|-------------|---|-----------|---|---|--------|---------|--------|-----------|-----|-----|
| rs4443403   | 5 | 72654304  | T | C | 0.903  | -0.0597 | 0.0294 | 0.04221   | Yes | No  |
| rs10078021  | 5 | 75038431  | T | G | 0.6277 | -0.1534 | 0.0182 | 3.15E-17  | Yes | No  |
| rs10057188  | 5 | 77837789  | A | G | 0.4589 | -0.0492 | 0.0176 | 0.005172  | Yes | No  |
| rs10059921  | 5 | 87514515  | T | G | 0.0822 | -0.2184 | 0.0336 | 8.43E-11  | Yes | No  |
| rs62380354  | 5 | 89484911  | A | C | 0.8904 | 0.1825  | 0.0291 | 3.68E-10  | Yes | No  |
| rs709668    | 5 | 96174186  | A | G | 0.2001 | -0.1522 | 0.0216 | 2.02E-12  | Yes | No  |
| rs1871190   | 5 | 97953719  | T | G | 0.3344 | 0.1078  | 0.0186 | 6.63E-09  | Yes | No  |
| rs286809    | 5 | 107458637 | A | G | 0.1721 | -0.0485 | 0.0229 | 0.03438   | Yes | No  |
| rs79409628  | 5 | 108113740 | T | G | 0.0843 | 0.0467  | 0.0312 | 0.1341    | Yes | No  |
| rs10077885  | 5 | 114390121 | A | C | 0.509  | -0.1439 | 0.0177 | 3.89E-16  | Yes | No  |
| rs1432457   | 5 | 119781569 | A | G | 0.7146 | -0.0321 | 0.0192 | 0.09399   | Yes | No  |
| rs9885577   | 5 | 121194226 | T | C | 0.3703 | 0.0698  | 0.0184 | 0.0001482 | Yes | No  |
| rs13359291  | 5 | 122476457 | A | G | 0.1568 | 0.2125  | 0.0239 | 5.28E-19  | Yes | No  |
| rs6891344   | 5 | 123136656 | A | G | 0.8186 | 0.2064  | 0.0227 | 8.98E-20  | Yes | No  |
| rs62373688  | 5 | 127352807 | A | T | 0.1315 | 0.1089  | 0.026  | 2.79E-05  | Yes | No  |
| rs6595838   | 5 | 127868199 | A | G | 0.2994 | 0.1688  | 0.0189 | 4.69E-19  | Yes | No  |
| rs12521868  | 5 | 131784393 | T | G | 0.423  | -0.1403 | 0.0176 | 1.83E-15  | Yes | Yes |
| rs55747751  | 5 | 132397351 | A | G | 0.081  | -0.2239 | 0.0331 | 1.39E-11  | Yes | No  |
| rs702395    | 5 | 140086677 | T | C | 0.4366 | 0.0826  | 0.0175 | 2.39E-06  | Yes | No  |
| rs1650911   | 5 | 141740620 | C | G | 0.7654 | 0.1325  | 0.0211 | 3.19E-10  | Yes | No  |
| rs2400509   | 5 | 147696018 | A | G | 0.2583 | -0.016  | 0.0197 | 0.4166    | Yes | No  |
| rs9687065   | 5 | 148391140 | A | G | 0.8102 | 0.2199  | 0.0222 | 4.85E-23  | Yes | Yes |
| rs157678    | 5 | 156145654 | A | T | 0.6682 | -0.0415 | 0.0188 | 0.02781   | Yes | No  |
| rs11953630  | 5 | 157845402 | T | C | 0.3656 | -0.2367 | 0.0183 | 3.72E-38  | Yes | No  |
| rs62385385  | 5 | 158367249 | A | T | 0.3829 | 0.0588  | 0.0178 | 0.0009331 | Yes | No  |
| rs114503346 | 5 | 172192350 | T | C | 0.0461 | -0.2678 | 0.0426 | 3.10E-10  | Yes | No  |
| rs72812846  | 5 | 173377636 | A | T | 0.2785 | -0.2053 | 0.0197 | 2.15E-25  | Yes | No  |
| rs28362590  | 5 | 176731452 | T | G | 0.7537 | 0.1242  | 0.0203 | 8.70E-10  | Yes | No  |
| rs12153395  | 5 | 179411477 | A | G | 0.1148 | -0.1161 | 0.0278 | 3.03E-05  | Yes | No  |
| rs2745599   | 6 | 1613686   | A | G | 0.5521 | 0.115   | 0.0181 | 2.03E-10  | Yes | No  |
| rs1334576   | 6 | 7211818   | A | G | 0.4201 | 0.0421  | 0.0176 | 0.0164    | Yes | No  |
| rs9392172   | 6 | 7723962   | C | G | 0.5346 | -0.0099 | 0.0173 | 0.5662    | No  | No  |
| rs114275780 | 6 | 8224648   | A | T | 0.0591 | 0.0425  | 0.0387 | 0.2723    | Yes | No  |
| rs1630736   | 6 | 12295987  | T | C | 0.465  | -0.04   | 0.0177 | 0.02397   | No  | No  |
| rs9349379   | 6 | 12903957  | A | G | 0.5926 | -0.0053 | 0.0179 | 0.765     | Yes | No  |
| rs12216497  | 6 | 19028623  | T | C | 0.5626 | 0.0198  | 0.0174 | 0.2555    | Yes | No  |
| rs9368222   | 6 | 20686996  | A | C | 0.268  | 0.1179  | 0.0195 | 1.41E-09  | Yes | No  |
| rs6911827   | 6 | 22130601  | T | C | 0.4575 | 0.136   | 0.0176 | 9.68E-15  | Yes | No  |
| rs1799945   | 6 | 26091179  | C | G | 0.8503 | -0.3888 | 0.0244 | 3.88E-57  | Yes | No  |
| rs409558    | 6 | 31708147  | T | C | 0.8505 | 0.042   | 0.0248 | 0.0906    | Yes | No  |
| rs115245297 | 6 | 34244132  | T | C | 0.9551 | -0.3116 | 0.0437 | 1.06E-12  | Yes | No  |
| rs3176336   | 6 | 36648816  | A | T | 0.6109 | -0.0554 | 0.018  | 0.002097  | Yes | No  |
| rs4714224   | 6 | 39186743  | C | G | 0.2776 | -0.1358 | 0.0196 | 3.78E-12  | Yes | Yes |
| rs1563788   | 6 | 43308363  | T | C | 0.2861 | 0.1299  | 0.0191 | 9.88E-12  | Yes | No  |
| rs9472135   | 6 | 43809802  | T | C | 0.6981 | 0.1548  | 0.019  | 4.29E-16  | Yes | No  |
| rs78648104  | 6 | 50683009  | T | C | 0.9084 | -0.2413 | 0.0311 | 8.14E-15  | Yes | No  |
| rs13205180  | 6 | 51832494  | T | C | 0.4886 | 0.1721  | 0.0174 | 4.38E-23  | Yes | Yes |
| rs631441    | 6 | 53994626  | T | G | 0.6938 | -0.019  | 0.0187 | 0.3111    | Yes | No  |
| rs1925153   | 6 | 56102780  | T | C | 0.4465 | 0.0685  | 0.0179 | 0.0001278 | Yes | No  |
| rs504691    | 6 | 72206620  | A | C | 0.4002 | -0.1177 | 0.0177 | 3.14E-11  | Yes | Yes |
| rs12195276  | 6 | 73657714  | T | C | 0.7245 | 0.0179  | 0.0195 | 0.3571    | Yes | No  |
| rs10943605  | 6 | 79655477  | A | G | 0.4882 | 0.1723  | 0.0173 | 2.93E-23  | Yes | Yes |
| rs7753695   | 6 | 80818531  | T | C | 0.4386 | 0.1031  | 0.0176 | 4.77E-09  | Yes | No  |
| rs9449350   | 6 | 82281417  | T | C | 0.6802 | -0.0816 | 0.0185 | 1.04E-05  | Yes | No  |
| rs60255247  | 6 | 85283253  | A | C | 0.8876 | -0.0185 | 0.0279 | 0.5074    | Yes | No  |
| rs35410524  | 6 | 96885405  | T | C | 0.1878 | 0.1302  | 0.0222 | 4.57E-09  | Yes | No  |
| rs72613227  | 6 | 106320771 | A | T | 0.8731 | -0.1884 | 0.0285 | 3.87E-11  | Yes | No  |
| rs9486916   | 6 | 109013930 | T | C | 0.1976 | 0.0814  | 0.0221 | 0.0002307 | Yes | No  |
| rs3822857   | 6 | 116313931 | C | G | 0.3684 | -0.1238 | 0.018  | 6.09E-12  | Yes | No  |
| rs2693560   | 6 | 117523671 | A | G | 0.3669 | -0.1501 | 0.0181 | 1.09E-16  | Yes | No  |
| rs2498586   | 6 | 118026126 | T | C | 0.165  | -0.1054 | 0.0236 | 8.22E-06  | Yes | No  |
| rs9372498   | 6 | 118572486 | A | T | 0.0809 | 0.2731  | 0.0319 | 1.13E-17  | Yes | No  |
| rs9401090   | 6 | 119113317 | T | C | 0.745  | 0.11    | 0.02   | 3.76E-08  | Yes | Yes |
| rs11154027  | 6 | 121781390 | T | C | 0.4617 | -0.0662 | 0.0176 | 0.0001606 | Yes | No  |
| rs6925750   | 6 | 122287990 | T | C | 0.8859 | -0.0824 | 0.0272 | 0.002505  | Yes | No  |
| rs10782230  | 6 | 126228512 | A | G | 0.4838 | 0.0914  | 0.0173 | 1.25E-07  | Yes | No  |
| rs13209747  | 6 | 127115454 | T | C | 0.4409 | 0.3017  | 0.0175 | 6.23E-67  | Yes | Yes |
| rs9885632   | 6 | 131311909 | T | C | 0.7304 | 0.0866  | 0.0195 | 9.03E-06  | Yes | No  |
| rs4896104   | 6 | 135119089 | T | C | 0.5588 | 0.0511  | 0.0177 | 0.003842  | Yes | No  |
| rs668459    | 6 | 139835689 | T | C | 0.5864 | -0.1132 | 0.0175 | 1.01E-10  | Yes | No  |
| rs7763294   | 6 | 140383733 | T | G | 0.3163 | -0.0511 | 0.0186 | 0.005943  | Yes | No  |
| rs6941056   | 6 | 143591821 | C | G | 0.5584 | -0.0527 | 0.0175 | 0.002631  | No  | No  |



|             |   |           |   |   |        |          |        |           |     |     |
|-------------|---|-----------|---|---|--------|----------|--------|-----------|-----|-----|
| rs7765526   | 6 | 147713764 | A | G | 0.4629 | 0.1145   | 0.0176 | 8.02E-11  | Yes | No  |
| rs17080102  | 6 | 151004770 | C | G | 0.0696 | -0.4853  | 0.034  | 3.91E-46  | Yes | Yes |
| rs9479200   | 6 | 152398505 | A | G | 0.8861 | 0.1943   | 0.0275 | 1.45E-12  | Yes | No  |
| rs9479509   | 6 | 153427265 | A | G | 0.2954 | -0.1152  | 0.019  | 1.21E-09  | Yes | No  |
| rs598682    | 6 | 154418759 | A | G | 0.2512 | -0.1073  | 0.0199 | 7.20E-08  | Yes | Yes |
| rs449789    | 6 | 159699125 | C | G | 0.1392 | -0.0435  | 0.0251 | 0.08238   | Yes | No  |
| rs555754    | 6 | 160769423 | A | G | 0.4742 | -0.0167  | 0.0173 | 0.3347    | Yes | No  |
| rs9456648   | 6 | 161712235 | T | C | 0.3233 | -0.1166  | 0.0185 | 2.76E-10  | Yes | Yes |
| rs73030266  | 6 | 166179459 | A | T | 0.9329 | 0.304    | 0.0354 | 8.59E-18  | Yes | No  |
| rs4342401   | 6 | 169016615 | A | T | 0.5414 | -0.0388  | 0.0174 | 0.02609   | No  | No  |
| rs1322639   | 6 | 169587103 | A | G | 0.7766 | -0.1584  | 0.0209 | 3.87E-14  | Yes | No  |
| rs73033340  | 7 | 1195692   | A | G | 0.9638 | 0.5312   | 0.0525 | 5.06E-24  | No  | No  |
| rs6959688   | 7 | 1966831   | A | G | 0.5985 | -0.1269  | 0.0178 | 1.02E-12  | Yes | No  |
| rs2969070   | 7 | 2512545   | A | G | 0.6309 | -0.1791  | 0.0179 | 1.76E-23  | Yes | Yes |
| rs73049928  | 7 | 4669949   | A | G | 0.8062 | -0.1194  | 0.0224 | 1.05E-07  | Yes | No  |
| rs1468520   | 7 | 7290732   | A | G | 0.8329 | -0.1638  | 0.0234 | 2.49E-12  | Yes | Yes |
| rs13240040  | 7 | 14375977  | A | G | 0.6836 | 0.1186   | 0.019  | 3.98E-10  | Yes | Yes |
| rs2107595   | 7 | 19049388  | A | G | 0.1586 | -0.0382  | 0.0238 | 0.1082    | Yes | No  |
| rs4507656   | 7 | 22156538  | C | G | 0.6934 | -0.1487  | 0.0199 | 8.69E-14  | No  | No  |
| rs2069833   | 7 | 22767664  | T | C | 0.5747 | -0.0163  | 0.0175 | 0.3526    | Yes | No  |
| rs12979     | 7 | 24738164  | C | G | 0.869  | 0.0913   | 0.0257 | 0.0003883 | Yes | No  |
| rs1055144   | 7 | 25871109  | T | C | 0.1929 | -0.042   | 0.0219 | 0.05541   | Yes | No  |
| rs6969780   | 7 | 27159136  | C | G | 0.0917 | 0.163    | 0.0301 | 6.36E-08  | Yes | No  |
| rs7777128   | 7 | 27337113  | C | G | 0.0798 | 0.2591   | 0.032  | 5.46E-16  | Yes | No  |
| rs10274928  | 7 | 28142088  | A | G | 0.484  | 0.0694   | 0.0175 | 7.63E-05  | Yes | No  |
| rs917275    | 7 | 28658522  | A | G | 0.6095 | 0.0096   | 0.0179 | 0.5919    | Yes | No  |
| rs10233127  | 7 | 30933453  | A | T | 0.1075 | 0.1498   | 0.029  | 2.46E-07  | Yes | No  |
| rs342989    | 7 | 35467896  | A | G | 0.229  | 0.1631   | 0.0207 | 3.05E-15  | Yes | Yes |
| rs2052263   | 7 | 36225818  | A | G | 0.1183 | 0.0551   | 0.0275 | 0.04555   | Yes | No  |
| rs76206723  | 7 | 40447971  | A | G | 0.1071 | -0.0531  | 0.0282 | 0.05956   | Yes | No  |
| rs12701929  | 7 | 41722494  | T | C | 0.2504 | 1.00E-04 | 0.02   | 0.9946    | Yes | No  |
| rs1004558   | 7 | 44240407  | T | C | 0.1783 | -0.0168  | 0.0228 | 0.4619    | Yes | No  |
| rs73105827  | 7 | 45036785  | T | G | 0.0909 | -0.1878  | 0.0313 | 2.07E-09  | Yes | No  |
| rs11977526  | 7 | 46008110  | A | G | 0.4001 | 0.1093   | 0.0179 | 9.96E-10  | Yes | No  |
| rs71543920  | 7 | 46554358  | T | G | 0.9395 | 0.0179   | 0.0368 | 0.6267    | Yes | No  |
| rs12668436  | 7 | 47548893  | T | C | 0.7537 | -0.0419  | 0.0201 | 0.0369    | Yes | No  |
| rs17454517  | 7 | 50915776  | A | G | 0.4936 | 0.1216   | 0.0174 | 2.65E-12  | Yes | No  |
| rs6593297   | 7 | 56122058  | A | T | 0.3015 | 0.0492   | 0.0193 | 0.01084   | Yes | No  |
| rs2222544   | 7 | 69769369  | T | C | 0.7366 | -0.1001  | 0.0196 | 3.37E-07  | Yes | No  |
| rs1091811   | 7 | 73491212  | A | G | 0.169  | 0.0133   | 0.0232 | 0.5674    | Yes | No  |
| rs34324971  | 7 | 74107374  | A | G | 0.1851 | 0.1149   | 0.0232 | 7.55E-07  | Yes | No  |
| rs6963105   | 7 | 75097488  | A | G | 0.4385 | -0.0768  | 0.0184 | 2.97E-05  | Yes | No  |
| rs848445    | 7 | 77572461  | T | C | 0.2854 | -0.0745  | 0.0194 | 0.000124  | Yes | No  |
| rs11770630  | 7 | 89805241  | T | C | 0.5355 | -0.1187  | 0.0173 | 7.05E-12  | Yes | No  |
| rs10245696  | 7 | 90449362  | A | C | 0.4007 | 0.0176   | 0.0176 | 0.3188    | Yes | No  |
| rs2282978   | 7 | 92264410  | T | C | 0.6691 | -0.0064  | 0.0184 | 0.7302    | Yes | No  |
| rs1947228   | 7 | 96461649  | T | C | 0.418  | -0.1448  | 0.0177 | 2.59E-16  | Yes | Yes |
| rs12705090  | 7 | 100467700 | T | C | 0.1896 | 0.1596   | 0.0221 | 5.20E-13  | Yes | No  |
| rs17477177  | 7 | 106411858 | T | C | 0.7962 | 0.017    | 0.0215 | 0.4301    | Yes | No  |
| rs115172170 | 7 | 107019947 | T | C | 0.944  | -0.0479  | 0.0379 | 0.207     | Yes | No  |
| rs1997571   | 7 | 116198621 | A | G | 0.5914 | -0.0037  | 0.0176 | 0.8314    | Yes | No  |
| rs4728142   | 7 | 128573967 | A | G | 0.4446 | -0.0734  | 0.0175 | 2.70E-05  | Yes | No  |
| rs11556924  | 7 | 129663496 | T | C | 0.3827 | -0.181   | 0.0181 | 1.83E-23  | Yes | Yes |
| rs34072724  | 7 | 130432469 | A | G | 0.4903 | -0.1313  | 0.0174 | 4.38E-14  | Yes | No  |
| rs13238550  | 7 | 131059056 | A | G | 0.3979 | 0.1357   | 0.0177 | 1.62E-14  | Yes | No  |
| rs1722886   | 7 | 134215259 | A | T | 0.5667 | 0.1215   | 0.0175 | 3.75E-12  | No  | No  |
| rs10267979  | 7 | 136618188 | A | T | 0.3243 | 0.0107   | 0.0185 | 0.5629    | Yes | No  |
| rs7810028   | 7 | 139461616 | C | G | 0.8064 | 0.1407   | 0.0219 | 1.32E-10  | Yes | No  |
| rs12703989  | 7 | 140238048 | A | G | 0.4999 | 0.103    | 0.0175 | 4.35E-09  | Yes | No  |
| rs73727605  | 7 | 149474622 | A | G | 0.0662 | 0.0722   | 0.0357 | 0.04328   | Yes | No  |
| rs11771693  | 7 | 150050111 | A | G | 0.6754 | 0.0785   | 0.0187 | 2.59E-05  | Yes | No  |
| rs3918226   | 7 | 150690176 | T | C | 0.0813 | 0.6117   | 0.0329 | 5.31E-77  | Yes | No  |
| rs891511    | 7 | 150704843 | A | G | 0.3322 | -0.2634  | 0.0191 | 2.11E-43  | Yes | No  |
| rs10224002  | 7 | 151415041 | A | G | 0.7139 | -0.203   | 0.0194 | 9.99E-26  | Yes | No  |
| rs1870735   | 7 | 155744303 | C | G | 0.4528 | 0.1069   | 0.0178 | 1.94E-09  | No  | No  |
| rs9638084   | 7 | 156311745 | A | G | 0.3978 | 0.1154   | 0.0178 | 8.51E-11  | Yes | No  |
| rs4875958   | 8 | 1721090   | A | G | 0.7123 | 0.1056   | 0.0193 | 4.39E-08  | Yes | No  |
| rs2922895   | 8 | 6379932   | C | G | 0.4294 | 0.1317   | 0.0175 | 5.86E-14  | No  | No  |
| rs61040371  | 8 | 8503700   | T | C | 0.6288 | 0.0902   | 0.018  | 5.25E-07  | Yes | No  |
| rs62491354  | 8 | 9730663   | A | G | 0.1337 | 0.1281   | 0.0255 | 4.86E-07  | Yes | No  |
| rs1986971   | 8 | 10268736  | A | G | 0.7062 | 0.1047   | 0.0192 | 4.60E-08  | Yes | No  |
| rs2898290   | 8 | 11433909  | T | C | 0.4754 | 0.1393   | 0.0175 | 1.46E-15  | Yes | No  |

|             |    |           |   |   |        |         |        |           |     |     |
|-------------|----|-----------|---|---|--------|---------|--------|-----------|-----|-----|
| rs75902664  | 8  | 17427186  | A | G | 0.9739 | -0.3546 | 0.0569 | 4.65E-10  | Yes | No  |
| rs1047030   | 8  | 22428708  | A | G | 0.8037 | 0.1264  | 0.0233 | 5.69E-08  | Yes | No  |
| rs62503324  | 8  | 23400615  | T | C | 0.2397 | 0.2033  | 0.0204 | 2.11E-23  | Yes | No  |
| rs6557876   | 8  | 25900675  | T | C | 0.2503 | -0.1973 | 0.02   | 7.07E-23  | Yes | No  |
| rs17321041  | 8  | 26445194  | T | C | 0.0633 | 0.2313  | 0.0363 | 1.78E-10  | Yes | Yes |
| rs2979470   | 8  | 30288272  | T | C | 0.4903 | 0.1016  | 0.0173 | 4.61E-09  | Yes | No  |
| rs11991469  | 8  | 32413280  | C | G | 0.5397 | 0.012   | 0.0174 | 0.4896    | No  | No  |
| rs7845722   | 8  | 33309993  | A | G | 0.6012 | 0.0022  | 0.0177 | 0.9019    | Yes | No  |
| rs1906672   | 8  | 38130025  | A | G | 0.2324 | 0.1402  | 0.0205 | 8.48E-12  | Yes | No  |
| rs2978456   | 8  | 42324765  | T | C | 0.552  | -0.0095 | 0.0179 | 0.5951    | No  | No  |
| rs4873492   | 8  | 51947549  | T | C | 0.1725 | 0.1401  | 0.0231 | 1.28E-09  | Yes | No  |
| rs6996733   | 8  | 60535824  | T | C | 0.8495 | 0.0935  | 0.0245 | 0.0001337 | Yes | No  |
| rs2354862   | 8  | 64501744  | A | C | 0.6402 | 0.1186  | 0.0182 | 6.45E-11  | Yes | No  |
| rs13253358  | 8  | 68920135  | T | C | 0.2981 | 0.1061  | 0.0189 | 2.00E-08  | Yes | No  |
| rs1350100   | 8  | 76054904  | A | G | 0.4458 | -0.0589 | 0.0175 | 0.0007837 | Yes | No  |
| rs1449544   | 8  | 76591880  | A | C | 0.5438 | 0.0131  | 0.0174 | 0.4504    | Yes | No  |
| rs72688070  | 8  | 81393697  | T | C | 0.1682 | -0.1363 | 0.0233 | 5.14E-09  | Yes | No  |
| rs56345595  | 8  | 82814156  | A | G | 0.5848 | 0.1329  | 0.0177 | 5.20E-14  | Yes | No  |
| rs2142141   | 8  | 90940205  | C | G | 0.5331 | -0.1054 | 0.0179 | 3.68E-09  | No  | No  |
| rs7009170   | 8  | 92149429  | T | C | 0.3186 | -0.0143 | 0.0186 | 0.4401    | Yes | No  |
| rs62526122  | 8  | 92769569  | A | G | 0.2917 | 0.1     | 0.0197 | 4.02E-07  | Yes | No  |
| rs4582532   | 8  | 95969257  | A | G | 0.5064 | -0.1061 | 0.0174 | 9.88E-10  | Yes | No  |
| rs2978098   | 8  | 101676675 | A | C | 0.5465 | 0.1548  | 0.0176 | 1.33E-18  | Yes | No  |
| rs142449193 | 8  | 102750597 | T | C | 0.046  | -0.2573 | 0.0426 | 1.51E-09  | Yes | No  |
| rs2513877   | 8  | 103883630 | A | G | 0.1917 | -0.1294 | 0.022  | 4.22E-09  | Yes | No  |
| rs35783704  | 8  | 105966258 | A | G | 0.104  | -0.2132 | 0.0291 | 2.28E-13  | Yes | No  |
| rs28499085  | 8  | 110107161 | A | G | 0.725  | 0.0516  | 0.0195 | 0.00801   | Yes | No  |
| rs2205260   | 8  | 116959837 | A | C | 0.1677 | -0.1138 | 0.0232 | 9.67E-07  | Yes | No  |
| rs2071518   | 8  | 120435812 | T | C | 0.2619 | -0.1869 | 0.0197 | 1.92E-21  | Yes | No  |
| rs62523863  | 8  | 126520544 | A | G | 0.2191 | 0.1485  | 0.0211 | 2.12E-12  | Yes | No  |
| rs4598218   | 8  | 129483956 | T | C | 0.6163 | 0.0948  | 0.018  | 1.31E-07  | Yes | No  |
| rs894344    | 8  | 135612745 | A | G | 0.5926 | -0.1267 | 0.0176 | 5.79E-13  | Yes | Yes |
| rs4454254   | 8  | 141060027 | A | G | 0.6308 | 0.0249  | 0.0179 | 0.1638    | Yes | No  |
| rs10087782  | 8  | 141858620 | T | C | 0.4463 | 0.132   | 0.0174 | 2.99E-14  | Yes | Yes |
| rs34591516  | 8  | 142367087 | T | C | 0.049  | 0.3121  | 0.0409 | 2.26E-14  | Yes | No  |
| rs4129585   | 8  | 143312933 | A | C | 0.4414 | 0.0927  | 0.0175 | 1.20E-07  | Yes | No  |
| rs62524579  | 8  | 144060955 | A | G | 0.5335 | -0.1656 | 0.0182 | 1.08E-19  | Yes | No  |
| rs56233017  | 8  | 144981488 | A | G | 0.0457 | -0.2743 | 0.044  | 4.37E-10  | Yes | No  |
| rs520015    | 9  | 211762    | C | G | 0.5129 | 0.0985  | 0.0174 | 1.42E-08  | No  | No  |
| rs60191654  | 9  | 753648    | A | G | 0.8114 | -0.1191 | 0.0222 | 7.92E-08  | Yes | No  |
| rs12216886  | 9  | 2493751   | T | G | 0.8077 | 0.1292  | 0.0221 | 4.76E-09  | Yes | Yes |
| rs28558845  | 9  | 4334791   | C | G | 0.1548 | -0.1237 | 0.0243 | 3.74E-07  | Yes | No  |
| rs1332813   | 9  | 9350706   | T | C | 0.3514 | 0.1139  | 0.0181 | 3.34E-10  | Yes | No  |
| rs35287509  | 9  | 10594635  | T | C | 0.6622 | -0.1082 | 0.0184 | 4.17E-09  | Yes | No  |
| rs11789875  | 9  | 16872323  | A | G | 0.1515 | 0.0112  | 0.0243 | 0.6433    | Yes | No  |
| rs4977492   | 9  | 19057551  | T | C | 0.6621 | 0.0058  | 0.0184 | 0.7525    | Yes | No  |
| rs4364717   | 9  | 21801530  | A | G | 0.5475 | -0.1006 | 0.0174 | 7.56E-09  | Yes | Yes |
| rs9886665   | 9  | 22942770  | T | C | 0.2668 | 0.1003  | 0.0198 | 4.21E-07  | Yes | No  |
| rs4553000   | 9  | 34223553  | T | C | 0.514  | -0.0594 | 0.0173 | 0.000591  | Yes | No  |
| rs76452347  | 9  | 35906471  | T | C | 0.2053 | -0.2246 | 0.0229 | 9.37E-23  | No  | No  |
| rs11139596  | 9  | 85128518  | T | G | 0.7757 | 0.0333  | 0.0213 | 0.1182    | Yes | No  |
| rs11141731  | 9  | 89888472  | T | C | 0.228  | -0.1258 | 0.0207 | 1.31E-09  | Yes | No  |
| rs7045409   | 9  | 95201540  | A | T | 0.3669 | -0.0637 | 0.0181 | 0.0004253 | Yes | No  |
| rs10988442  | 9  | 101739709 | A | G | 0.6195 | -0.0304 | 0.018  | 0.0909    | Yes | No  |
| rs7020564   | 9  | 109670016 | A | T | 0.7009 | -0.1111 | 0.0192 | 6.73E-09  | Yes | Yes |
| rs7043304   | 9  | 112358150 | T | C | 0.8548 | 0.176   | 0.0249 | 1.63E-12  | Yes | Yes |
| rs111245230 | 9  | 113169775 | T | C | 0.9654 | -0.37   | 0.0481 | 1.45E-14  | Yes | No  |
| rs13290326  | 9  | 116696625 | T | C | 0.5019 | -0.0641 | 0.0173 | 0.0002183 | Yes | No  |
| rs10982910  | 9  | 118534500 | T | G | 0.9039 | 0.0718  | 0.0298 | 0.01596   | Yes | No  |
| rs1861881   | 9  | 119312256 | T | G | 0.3159 | 0.115   | 0.0186 | 6.49E-10  | Yes | Yes |
| rs1953126   | 9  | 123640500 | T | C | 0.3534 | -0.0088 | 0.0182 | 0.6287    | Yes | No  |
| rs10818775  | 9  | 125755571 | T | C | 0.1213 | -0.0296 | 0.0267 | 0.2679    | Yes | No  |
| rs7861040   | 9  | 127044135 | C | G | 0.3674 | -0.0776 | 0.0179 | 1.50E-05  | Yes | No  |
| rs72765298  | 9  | 127900996 | T | C | 0.8746 | -0.0228 | 0.0266 | 0.3904    | Yes | No  |
| rs7023828   | 9  | 128498594 | T | C | 0.418  | -0.1259 | 0.0176 | 9.79E-13  | Yes | No  |
| rs1891730   | 9  | 130309028 | T | C | 0.6163 | -0.0839 | 0.0181 | 3.61E-06  | Yes | No  |
| rs7869756   | 9  | 131210410 | A | G | 0.8106 | 0.091   | 0.0225 | 5.29E-05  | Yes | No  |
| rs184457    | 9  | 131940019 | A | G | 0.3087 | -0.0798 | 0.0188 | 2.18E-05  | Yes | No  |
| rs687621    | 9  | 136137065 | A | G | 0.6733 | 0.1834  | 0.0186 | 5.30E-23  | Yes | No  |
| rs6271      | 9  | 136522274 | T | C | 0.0737 | -0.4313 | 0.0352 | 1.72E-34  | No  | No  |
| rs11145807  | 9  | 139520789 | A | G | 0.4058 | 0.155   | 0.0184 | 4.10E-17  | No  | No  |
| rs56352451  | 10 | 5804865   | T | C | 0.1323 | 0.0981  | 0.0255 | 0.0001168 | Yes | No  |

|             |    |           |   |   |        |           |        |           |     |     |
|-------------|----|-----------|---|---|--------|-----------|--------|-----------|-----|-----|
| rs36006409  | 10 | 10876943  | T | G | 0.7932 | -0.0303   | 0.0215 | 0.1588    | Yes | No  |
| rs10906391  | 10 | 13523937  | T | C | 0.3171 | 0.1286    | 0.0188 | 7.57E-12  | Yes | No  |
| rs4373814   | 10 | 18419972  | C | G | 0.4269 | 0.1981    | 0.0175 | 1.28E-29  | No  | No  |
| rs1813353   | 10 | 18707448  | T | C | 0.663  | 0.3013    | 0.0183 | 5.97E-61  | Yes | Yes |
| rs11010905  | 10 | 19934813  | A | T | 0.4855 | -0.0602   | 0.0173 | 0.0005097 | No  | No  |
| rs72795925  | 10 | 20531420  | T | C | 0.2206 | -0.0428   | 0.0209 | 0.04048   | Yes | No  |
| rs10732433  | 10 | 21037294  | T | C | 0.4205 | -0.0324   | 0.0175 | 0.06419   | Yes | No  |
| rs3802517   | 10 | 28233469  | A | T | 0.4615 | 0.1286    | 0.0173 | 9.29E-14  | No  | No  |
| rs1265842   | 10 | 28924901  | T | C | 0.4834 | 0.1113    | 0.0174 | 1.70E-10  | Yes | No  |
| rs9337951   | 10 | 30317073  | A | G | 0.3417 | -0.1073   | 0.0191 | 1.89E-08  | No  | No  |
| rs11008355  | 10 | 31412561  | C | G | 0.2389 | 0.0893    | 0.0203 | 1.10E-05  | Yes | No  |
| rs10826995  | 10 | 32082658  | T | C | 0.7157 | -0.0328   | 0.0192 | 0.08807   | Yes | No  |
| rs76164690  | 10 | 32590362  | T | G | 0.8587 | -0.154    | 0.025  | 7.19E-10  | Yes | No  |
| rs2246438   | 10 | 45273079  | A | G | 0.2757 | -0.1119   | 0.0194 | 7.81E-09  | Yes | No  |
| rs34130368  | 10 | 48411796  | T | G | 0.1172 | -0.2027   | 0.0284 | 8.77E-13  | No  | No  |
| rs10761530  | 10 | 62390726  | T | C | 0.4981 | 0.117     | 0.0172 | 1.14E-11  | Yes | No  |
| rs1530440   | 10 | 63524591  | T | C | 0.1877 | -0.3877   | 0.0221 | 9.10E-69  | Yes | No  |
| rs7090758   | 10 | 65335315  | T | C | 0.5282 | -0.1533   | 0.0173 | 6.89E-19  | Yes | No  |
| rs7914287   | 10 | 69350563  | T | C | 0.7801 | -0.0442   | 0.0211 | 0.03633   | Yes | No  |
| rs10823136  | 10 | 69855363  | T | C | 0.9223 | -0.1062   | 0.0336 | 0.001568  | Yes | No  |
| rs10998362  | 10 | 70404159  | T | C | 0.3169 | -0.0278   | 0.0192 | 0.1474    | Yes | No  |
| rs12572586  | 10 | 74751579  | T | C | 0.9375 | -0.1724   | 0.0366 | 2.54E-06  | Yes | No  |
| rs10887914  | 10 | 82215288  | T | C | 0.462  | 0.0456    | 0.0173 | 0.008412  | Yes | No  |
| rs77413490  | 10 | 89681688  | T | G | 0.0424 | 0.1757    | 0.0438 | 5.92E-05  | Yes | No  |
| rs11187142  | 10 | 94468685  | T | C | 0.1049 | 0.1237    | 0.0284 | 1.34E-05  | Yes | No  |
| rs932764    | 10 | 95895940  | A | G | 0.5696 | -0.1809   | 0.0175 | 5.94E-25  | Yes | No  |
| rs4494250   | 10 | 96563757  | A | G | 0.3627 | 0.1917    | 0.0181 | 3.06E-26  | Yes | No  |
| rs603424    | 10 | 102075479 | A | G | 0.1772 | 0.1776    | 0.023  | 1.24E-14  | Yes | No  |
| rs112184198 | 10 | 102604514 | A | G | 0.1044 | -0.3566   | 0.0285 | 8.23E-36  | Yes | No  |
| rs72847884  | 10 | 103115345 | A | G | 0.9534 | 0.2664    | 0.0423 | 3.04E-10  | Yes | No  |
| rs11191156  | 10 | 103702763 | A | G | 0.6482 | -8.00E-04 | 0.0182 | 0.9644    | Yes | No  |
| rs11191548  | 10 | 104846178 | T | C | 0.9191 | 0.5062    | 0.0318 | 4.53E-57  | Yes | No  |
| rs4387287   | 10 | 105677897 | A | C | 0.1642 | 0.1575    | 0.0234 | 1.77E-11  | Yes | No  |
| rs191784289 | 10 | 106894942 | T | C | 0.0123 | 0.7062    | 0.0815 | 4.66E-18  | Yes | No  |
| rs111777102 | 10 | 111965826 | T | C | 0.0657 | 0.214     | 0.0354 | 1.56E-09  | Yes | No  |
| rs34872471  | 10 | 114754071 | T | C | 0.7077 | -0.0116   | 0.0191 | 0.5433    | Yes | No  |
| rs2782980   | 10 | 115781527 | T | C | 0.2832 | -0.298    | 0.0194 | 3.25E-53  | Yes | No  |
| rs11197813  | 10 | 118523933 | A | G | 0.699  | -0.0911   | 0.0189 | 1.47E-06  | Yes | No  |
| rs72842207  | 10 | 121433675 | T | C | 0.2149 | -0.2112   | 0.0211 | 1.10E-23  | Yes | No  |
| rs11592107  | 10 | 122968964 | A | G | 0.3094 | 0.1203    | 0.0187 | 1.23E-10  | Yes | No  |
| rs72834453  | 10 | 124235226 | T | G | 0.8762 | -0.1555   | 0.0267 | 5.87E-09  | Yes | No  |
| rs4411245   | 10 | 126712781 | A | G | 0.294  | 0.0929    | 0.019  | 9.74E-07  | Yes | No  |
| rs7096563   | 10 | 133770229 | A | G | 0.3547 | 0.1122    | 0.0184 | 1.00E-09  | Yes | No  |
| rs1133400   | 10 | 134459388 | A | G | 0.7852 | -0.1318   | 0.0215 | 8.30E-10  | Yes | No  |
| rs7126805   | 11 | 828916    | A | G | 0.7278 | 0.0066    | 0.02   | 0.7423    | Yes | No  |
| rs661348    | 11 | 1905292   | T | C | 0.5757 | -0.1966   | 0.0181 | 1.33E-27  | Yes | No  |
| rs17224476  | 11 | 4673788   | A | G | 0.1116 | 0.1597    | 0.0276 | 7.37E-09  | Yes | Yes |
| rs2929184   | 11 | 6289118   | A | G | 0.7711 | 0.1092    | 0.0214 | 3.29E-07  | Yes | No  |
| rs110419    | 11 | 8252853   | A | G | 0.4781 | 0.112     | 0.0171 | 6.16E-11  | Yes | No  |
| rs10743086  | 11 | 8774923   | A | G | 0.2071 | -0.1317   | 0.0214 | 7.46E-10  | Yes | Yes |
| rs360153    | 11 | 9762274   | T | C | 0.4172 | -0.2198   | 0.0175 | 4.37E-36  | Yes | No  |
| rs7129220   | 11 | 10350538  | A | G | 0.1191 | 0.2636    | 0.0271 | 2.02E-22  | Yes | No  |
| rs900145    | 11 | 13293905  | T | C | 0.7038 | 0.1493    | 0.0189 | 2.62E-15  | Yes | Yes |
| rs4757391   | 11 | 16302939  | T | C | 0.7977 | -0.3041   | 0.0215 | 1.69E-45  | Yes | Yes |
| rs381815    | 11 | 16902268  | T | C | 0.2754 | 0.1733    | 0.0194 | 4.00E-19  | Yes | No  |
| rs5219      | 11 | 17409572  | T | C | 0.3654 | 0.1317    | 0.0179 | 2.10E-13  | Yes | No  |
| rs10766533  | 11 | 19224677  | A | T | 0.7112 | 0.082     | 0.0193 | 2.19E-05  | Yes | No  |
| rs11026586  | 11 | 22515533  | A | G | 0.0702 | 0.2898    | 0.0343 | 2.68E-17  | Yes | No  |
| rs11030119  | 11 | 27728102  | A | G | 0.302  | -0.1679   | 0.0189 | 7.31E-19  | Yes | No  |
| rs871004    | 11 | 28512458  | A | G | 0.3479 | 0.1188    | 0.0182 | 6.05E-11  | Yes | No  |
| rs11031051  | 11 | 30355707  | A | C | 0.6909 | -0.0529   | 0.0188 | 0.0049    | Yes | No  |
| rs919045    | 11 | 31111810  | T | C | 0.6289 | 0.1193    | 0.0179 | 2.75E-11  | Yes | No  |
| rs4922591   | 11 | 32374199  | T | C | 0.3853 | -0.0355   | 0.018  | 0.04865   | Yes | No  |
| rs190194639 | 11 | 34068037  | T | C | 0.0764 | 0.1479    | 0.0331 | 7.84E-06  | Yes | No  |
| rs7480089   | 11 | 45207851  | A | G | 0.1176 | 0.0033    | 0.0271 | 0.9023    | Yes | No  |
| rs1585453   | 11 | 46884713  | A | T | 0.887  | -0.238    | 0.0281 | 2.35E-17  | Yes | No  |
| rs7103648   | 11 | 47461783  | A | G | 0.613  | -0.235    | 0.0178 | 7.18E-40  | Yes | Yes |
| rs11537751  | 11 | 47587452  | T | C | 0.0551 | 0.2117    | 0.0385 | 3.75E-08  | Yes | No  |
| rs2688716   | 11 | 54835623  | T | G | 0.2891 | -0.1333   | 0.02   | 2.38E-11  | No  | No  |
| rs75905900  | 11 | 55113534  | A | C | 0.8653 | 0.2015    | 0.0257 | 4.10E-15  | Yes | No  |
| rs11607056  | 11 | 57496820  | T | C | 0.3281 | -0.0624   | 0.0184 | 0.0006895 | Yes | No  |
| rs11229457  | 11 | 58207203  | T | C | 0.2125 | -0.1504   | 0.0212 | 1.25E-12  | Yes | No  |

|             |    |           |   |   |        |         |        |           |     |     |
|-------------|----|-----------|---|---|--------|---------|--------|-----------|-----|-----|
| rs751984    | 11 | 61278246  | T | C | 0.8826 | 0.3937  | 0.0275 | 1.38E-46  | Yes | Yes |
| rs4980515   | 11 | 63744609  | T | C | 0.4987 | 0.0687  | 0.0174 | 7.61E-05  | Yes | No  |
| rs3741378   | 11 | 65408937  | T | C | 0.1354 | -0.2272 | 0.0255 | 5.79E-19  | Yes | No  |
| rs67976715  | 11 | 68023742  | C | G | 0.2342 | 0.1333  | 0.0206 | 9.78E-11  | Yes | No  |
| rs67330701  | 11 | 69079707  | T | C | 0.0933 | -0.2798 | 0.0322 | 3.22E-18  | Yes | No  |
| rs875106    | 11 | 70005641  | A | G | 0.5219 | -0.1329 | 0.0173 | 1.71E-14  | Yes | Yes |
| rs504217    | 11 | 72006086  | T | C | 0.0736 | 0.2745  | 0.0335 | 2.51E-16  | Yes | No  |
| rs2298807   | 11 | 73068571  | T | C | 0.7842 | 0.1233  | 0.0211 | 4.89E-09  | Yes | Yes |
| rs4420291   | 11 | 74374950  | A | G | 0.5056 | 0.0971  | 0.0174 | 2.17E-08  | Yes | No  |
| rs7927515   | 11 | 76125330  | A | C | 0.3459 | 0.1198  | 0.0183 | 5.92E-11  | Yes | No  |
| rs59986178  | 11 | 77359909  | C | G | 0.1045 | 0.176   | 0.0299 | 3.92E-09  | Yes | No  |
| rs2450128   | 11 | 77940075  | A | G | 0.1544 | -0.1505 | 0.024  | 3.53E-10  | Yes | No  |
| rs2289125   | 11 | 89224453  | A | C | 0.2196 | 0.1181  | 0.0215 | 4.11E-08  | Yes | No  |
| rs10830963  | 11 | 92708710  | C | G | 0.7237 | 0.0092  | 0.0199 | 0.6446    | Yes | No  |
| rs11021221  | 11 | 95308854  | A | T | 0.1668 | -0.1877 | 0.0233 | 6.93E-16  | Yes | Yes |
| rs633185    | 11 | 100593538 | C | G | 0.7133 | 0.376   | 0.0192 | 2.29E-85  | Yes | Yes |
| rs61892344  | 11 | 101100768 | T | C | 0.1741 | -0.1172 | 0.0229 | 2.92E-07  | Yes | No  |
| rs12807220  | 11 | 102077200 | A | G | 0.3596 | 0.0731  | 0.0182 | 5.88E-05  | Yes | No  |
| rs4754196   | 11 | 107096777 | A | G | 0.5204 | -0.1535 | 0.0174 | 1.09E-18  | Yes | No  |
| rs12362593  | 11 | 111586091 | C | G | 0.73   | -0.1275 | 0.0199 | 1.57E-10  | Yes | No  |
| rs17119370  | 11 | 116097136 | A | T | 0.6933 | 0.1221  | 0.0189 | 1.11E-10  | Yes | No  |
| rs1076485   | 11 | 116772441 | T | C | 0.13   | 0.1576  | 0.0262 | 1.83E-09  | Yes | No  |
| rs8258      | 11 | 117283676 | T | C | 0.3746 | -0.063  | 0.0179 | 0.0004321 | Yes | No  |
| rs12574332  | 11 | 122521123 | T | C | 0.1227 | 0.2072  | 0.0266 | 6.14E-15  | Yes | No  |
| rs11222386  | 11 | 130779068 | C | G | 0.1971 | -0.0132 | 0.0218 | 0.5458    | Yes | No  |
| rs78998485  | 12 | 434755    | C | G | 0.7438 | -0.0848 | 0.0199 | 2.14E-05  | Yes | No  |
| rs11571376  | 12 | 1059556   | C | G | 0.706  | -0.0737 | 0.0192 | 0.0001205 | Yes | No  |
| rs55935819  | 12 | 2521579   | A | G | 0.3636 | 0.1271  | 0.0181 | 1.96E-12  | Yes | No  |
| rs117233107 | 12 | 4328521   | A | G | 0.0158 | -0.0846 | 0.0783 | 0.2801    | Yes | No  |
| rs75507123  | 12 | 5417856   | T | G | 0.1274 | -0.1434 | 0.0261 | 3.94E-08  | Yes | No  |
| rs7132012   | 12 | 8832203   | A | G | 0.6747 | 0.1563  | 0.0185 | 3.17E-17  | Yes | Yes |
| rs2024385   | 12 | 12888438  | A | T | 0.4241 | -0.1113 | 0.0177 | 2.88E-10  | No  | No  |
| rs28621435  | 12 | 13860990  | A | G | 0.1148 | -0.1333 | 0.0278 | 1.65E-06  | Yes | No  |
| rs7313556   | 12 | 15297359  | A | G | 0.3487 | 0.0878  | 0.0181 | 1.24E-06  | Yes | No  |
| rs61912333  | 12 | 19554817  | C | G | 0.4963 | 0.1191  | 0.0176 | 1.13E-11  | No  | No  |
| rs12579720  | 12 | 20173764  | C | G | 0.2435 | -0.2865 | 0.0203 | 3.46E-45  | Yes | Yes |
| rs73080726  | 12 | 20754154  | T | C | 0.1015 | -0.0272 | 0.0289 | 0.3468    | Yes | No  |
| rs704191    | 12 | 22015022  | T | C | 0.4634 | -0.0155 | 0.0174 | 0.373     | Yes | No  |
| rs7976167   | 12 | 24210599  | T | C | 0.6891 | 0.0868  | 0.0187 | 3.55E-06  | Yes | No  |
| rs17287293  | 12 | 24770878  | A | G | 0.8505 | 0.1249  | 0.0242 | 2.48E-07  | Yes | No  |
| rs6487543   | 12 | 26438189  | A | G | 0.7705 | 0.1325  | 0.0212 | 4.21E-10  | Yes | No  |
| rs1098708   | 12 | 27321112  | A | G | 0.5413 | -0.0956 | 0.0175 | 4.63E-08  | Yes | No  |
| rs10842991  | 12 | 27962103  | T | C | 0.1973 | 0.0921  | 0.022  | 2.87E-05  | Yes | No  |
| rs7965392   | 12 | 42540280  | A | G | 0.387  | 0.1118  | 0.0179 | 4.16E-10  | Yes | No  |
| rs11168245  | 12 | 48204499  | C | G | 0.7644 | 0.1758  | 0.0205 | 1.09E-17  | No  | No  |
| rs2261608   | 12 | 48721634  | A | T | 0.3512 | 0.0016  | 0.0181 | 0.9313    | Yes | No  |
| rs1126930   | 12 | 49399132  | C | G | 0.0351 | 0.2633  | 0.0491 | 8.26E-08  | Yes | No  |
| rs7977389   | 12 | 49981722  | T | C | 0.8937 | 0.0713  | 0.0282 | 0.01155   | Yes | No  |
| rs7302981   | 12 | 50537815  | A | G | 0.3783 | 0.2652  | 0.0177 | 1.69E-50  | Yes | Yes |
| rs61926181  | 12 | 50767037  | A | G | 0.0385 | -0.4813 | 0.0484 | 2.76E-23  | Yes | No  |
| rs73099903  | 12 | 53440779  | T | C | 0.0829 | 0.2204  | 0.032  | 5.57E-12  | Yes | No  |
| rs7297416   | 12 | 54443090  | A | C | 0.6958 | 0.1597  | 0.019  | 4.33E-17  | Yes | No  |
| rs7137749   | 12 | 57098040  | T | C | 0.3675 | 0.1412  | 0.0181 | 7.23E-15  | Yes | No  |
| rs10437954  | 12 | 58003922  | A | G | 0.9068 | -0.2062 | 0.0308 | 2.14E-11  | Yes | No  |
| rs4143175   | 12 | 67782397  | T | C | 0.2411 | 0.1139  | 0.0203 | 2.11E-08  | Yes | No  |
| rs513177    | 12 | 69950545  | T | C | 0.1404 | 0.1694  | 0.0249 | 9.93E-12  | No  | No  |
| rs7963801   | 12 | 79685226  | T | C | 0.4226 | -0.1083 | 0.0179 | 1.49E-09  | No  | No  |
| rs17249754  | 12 | 90060586  | A | G | 0.1685 | -0.3826 | 0.0232 | 5.89E-61  | Yes | No  |
| rs10858966  | 12 | 90567026  | C | G | 0.2987 | 0.151   | 0.0191 | 2.77E-15  | Yes | Yes |
| rs76785029  | 12 | 94882905  | T | C | 0.079  | 0.1561  | 0.0334 | 2.96E-06  | Yes | No  |
| rs7977311   | 12 | 95487226  | T | C | 0.1153 | -0.0153 | 0.0271 | 0.5727    | Yes | No  |
| rs11108209  | 12 | 96109855  | T | C | 0.9068 | -0.1901 | 0.03   | 2.40E-10  | Yes | Yes |
| rs7134060   | 12 | 96717095  | A | G | 0.4467 | -0.1058 | 0.0174 | 1.13E-09  | Yes | No  |
| rs10778174  | 12 | 102838996 | A | G | 0.248  | -0.0922 | 0.0201 | 4.37E-06  | Yes | No  |
| rs11112548  | 12 | 105871914 | A | T | 0.9556 | 0.2742  | 0.0443 | 5.80E-10  | Yes | No  |
| rs12184466  | 12 | 111281636 | T | C | 0.1999 | 0.2533  | 0.0249 | 2.83E-24  | No  | No  |
| rs3184504   | 12 | 111884608 | T | C | 0.4808 | 0.4999  | 0.0175 | 8.04E-180 | Yes | Yes |
| rs10850411  | 12 | 115387796 | T | C | 0.6966 | 0.1765  | 0.0188 | 6.24E-21  | Yes | No  |
| rs35444     | 12 | 115552437 | A | G | 0.6141 | 0.2671  | 0.0179 | 1.91E-50  | Yes | Yes |
| rs11067763  | 12 | 116198341 | A | G | 0.8986 | 0.2177  | 0.0288 | 4.43E-14  | Yes | Yes |
| rs11615689  | 12 | 116699675 | T | C | 0.8198 | 0.008   | 0.0225 | 0.7233    | Yes | No  |
| rs3898618   | 12 | 120813921 | T | C | 0.9445 | -0.268  | 0.0383 | 2.49E-12  | Yes | No  |

|             |    |           |   |   |        |         |        |           |     |     |
|-------------|----|-----------|---|---|--------|---------|--------|-----------|-----|-----|
| rs28498002  | 12 | 122599796 | T | C | 0.4753 | -0.1566 | 0.0178 | 1.44E-18  | Yes | No  |
| rs1060105   | 12 | 123806219 | T | C | 0.2031 | -0.1894 | 0.0216 | 2.11E-18  | Yes | Yes |
| rs1271309   | 12 | 124820705 | A | G | 0.1621 | -0.1979 | 0.024  | 1.45E-16  | Yes | No  |
| rs117206641 | 12 | 133086888 | T | C | 0.1107 | 0.1454  | 0.0287 | 3.98E-07  | Yes | No  |
| rs2480171   | 13 | 21559858  | T | C | 0.1214 | 0.1114  | 0.027  | 3.74E-05  | Yes | No  |
| rs606950    | 13 | 22298923  | A | G | 0.6158 | 0.1383  | 0.0179 | 1.26E-14  | Yes | No  |
| rs55641580  | 13 | 25257917  | T | C | 0.126  | 0.1745  | 0.0265 | 4.79E-11  | Yes | No  |
| rs1331012   | 13 | 27115424  | T | G | 0.2706 | 0.0935  | 0.0195 | 1.62E-06  | Yes | No  |
| rs63418562  | 13 | 30146201  | T | C | 0.7569 | -0.1944 | 0.0204 | 1.34E-21  | No  | No  |
| rs9532243   | 13 | 32191408  | A | C | 0.4843 | 0.1339  | 0.0173 | 1.09E-14  | Yes | No  |
| rs9549297   | 13 | 41397482  | A | G | 0.8203 | -0.1483 | 0.0229 | 9.27E-11  | Yes | No  |
| rs4274337   | 13 | 41967193  | A | G | 0.169  | -0.1464 | 0.0234 | 4.07E-10  | Yes | No  |
| rs73187288  | 13 | 42738672  | A | C | 0.8909 | -0.1344 | 0.0279 | 1.43E-06  | Yes | No  |
| rs912434    | 13 | 47189928  | T | G | 0.759  | 0.0956  | 0.0202 | 2.27E-06  | Yes | No  |
| rs12583615  | 13 | 50564085  | A | G | 0.132  | 0.1576  | 0.0258 | 9.46E-10  | Yes | No  |
| rs9526707   | 13 | 51489186  | A | G | 0.3222 | -0.1217 | 0.0186 | 6.59E-11  | Yes | No  |
| rs75961402  | 13 | 56398286  | A | G | 0.1535 | 0.1254  | 0.0241 | 2.01E-07  | Yes | No  |
| rs9563529   | 13 | 58316637  | T | G | 0.2043 | 0.1222  | 0.0215 | 1.38E-08  | Yes | No  |
| rs3861113   | 13 | 72364382  | A | C | 0.0825 | 0.2126  | 0.0322 | 3.95E-11  | Yes | Yes |
| rs78474310  | 13 | 73826901  | A | G | 0.9551 | -0.2428 | 0.0423 | 9.74E-09  | Yes | No  |
| rs4304924   | 13 | 79238925  | A | G | 0.5677 | 0.0269  | 0.0176 | 0.1262    | Yes | No  |
| rs7988232   | 13 | 79808655  | A | G | 0.4109 | 0.0939  | 0.0178 | 1.24E-07  | Yes | No  |
| rs1215469   | 13 | 80707408  | A | C | 0.2295 | -0.1383 | 0.0211 | 5.23E-11  | Yes | No  |
| rs55684003  | 13 | 97988689  | A | G | 0.6959 | 0.122   | 0.0189 | 1.01E-10  | Yes | No  |
| rs3742182   | 13 | 111375132 | T | C | 0.8103 | -0.0261 | 0.0221 | 0.2373    | Yes | No  |
| rs9549328   | 13 | 113636156 | T | C | 0.2303 | 0.0868  | 0.0209 | 3.18E-05  | Yes | No  |
| rs7331680   | 13 | 115000650 | T | G | 0.1488 | 0.1767  | 0.0244 | 4.80E-13  | Yes | No  |
| rs17880989  | 14 | 23313633  | A | G | 0.0259 | 0.4014  | 0.0591 | 1.11E-11  | No  | No  |
| rs452036    | 14 | 23865885  | A | G | 0.3546 | 0.0873  | 0.0182 | 1.64E-06  | Yes | No  |
| rs17115145  | 14 | 30122409  | T | C | 0.397  | 0.0924  | 0.0177 | 1.86E-07  | Yes | No  |
| rs4424827   | 14 | 35110857  | T | C | 0.5669 | -0.0981 | 0.0175 | 2.11E-08  | Yes | No  |
| rs8904      | 14 | 35871217  | A | G | 0.3674 | 0.1     | 0.0181 | 3.36E-08  | Yes | No  |
| rs34983854  | 14 | 39858442  | A | G | 0.6022 | -0.071  | 0.0177 | 6.06E-05  | Yes | No  |
| rs72683923  | 14 | 50735947  | T | C | 0.9788 | 0.5325  | 0.0635 | 5.02E-17  | No  | No  |
| rs9888615   | 14 | 53377540  | T | C | 0.2906 | -0.112  | 0.0192 | 4.96E-09  | Yes | No  |
| rs210381    | 14 | 54107791  | A | G | 0.5655 | -0.0081 | 0.0175 | 0.6453    | Yes | No  |
| rs7144602   | 14 | 55285588  | T | G | 0.6484 | -0.0348 | 0.0183 | 0.05715   | Yes | No  |
| rs11628933  | 14 | 60700903  | C | G | 0.2336 | -0.1222 | 0.0206 | 3.12E-09  | Yes | Yes |
| rs731681    | 14 | 68010224  | C | G | 0.5584 | -0.1071 | 0.0174 | 7.98E-10  | No  | No  |
| rs57786342  | 14 | 69260028  | A | G | 0.2055 | 0.1423  | 0.0216 | 4.37E-11  | Yes | No  |
| rs11623535  | 14 | 72462381  | A | G | 0.7442 | 0.1026  | 0.0198 | 2.20E-07  | Yes | No  |
| rs4903064   | 14 | 73279420  | T | C | 0.7645 | 0.1543  | 0.0206 | 7.84E-14  | Yes | Yes |
| rs11159091  | 14 | 75074316  | A | G | 0.4615 | 0.0631  | 0.0175 | 0.0003164 | Yes | No  |
| rs11627326  | 14 | 85785251  | C | G | 0.2869 | -0.0604 | 0.0192 | 0.001708  | Yes | No  |
| rs4904503   | 14 | 89565130  | T | C | 0.298  | -0.073  | 0.019  | 0.0001261 | Yes | No  |
| rs11160085  | 14 | 93112102  | T | C | 0.7034 | 0.024   | 0.0193 | 0.2133    | Yes | No  |
| rs8013933   | 14 | 94465789  | T | C | 0.6909 | 0.0421  | 0.0189 | 0.02538   | Yes | No  |
| rs9323988   | 14 | 98587630  | T | C | 0.6158 | -0.0558 | 0.0178 | 0.001736  | Yes | No  |
| rs1475130   | 14 | 100225144 | T | C | 0.3466 | -0.0012 | 0.0183 | 0.948     | Yes | No  |
| rs28470843  | 14 | 100742658 | T | C | 0.5973 | -0.0266 | 0.0178 | 0.1351    | Yes | No  |
| rs11626434  | 14 | 101998443 | C | G | 0.361  | 0.0219  | 0.0185 | 0.2343    | Yes | No  |
| rs8014182   | 14 | 103859962 | T | C | 0.1319 | -0.1942 | 0.0257 | 3.94E-14  | Yes | Yes |
| rs34161718  | 14 | 104620193 | T | C | 0.2417 | -0.1319 | 0.0216 | 1.07E-09  | No  | No  |
| rs10873612  | 15 | 26105602  | T | C | 0.5961 | -0.1096 | 0.0179 | 9.51E-10  | Yes | No  |
| rs11629850  | 15 | 40317075  | A | G | 0.529  | 0.1279  | 0.0174 | 1.78E-13  | Yes | No  |
| rs2925345   | 15 | 41311799  | T | C | 0.4676 | 0.189   | 0.0174 | 1.60E-27  | Yes | Yes |
| rs4924570   | 15 | 41974660  | T | C | 0.6287 | -0.1692 | 0.0181 | 9.62E-21  | Yes | Yes |
| rs1036477   | 15 | 48914926  | A | G | 0.8973 | -0.1015 | 0.0285 | 0.0003731 | Yes | No  |
| rs3098186   | 15 | 50810621  | T | C | 0.5159 | -0.068  | 0.0175 | 0.0001014 | Yes | No  |
| rs3191402   | 15 | 59429160  | A | G | 0.4073 | -0.0127 | 0.0179 | 0.4789    | No  | No  |
| rs956006    | 15 | 62808539  | T | C | 0.3307 | 0.0752  | 0.0186 | 5.35E-05  | Yes | No  |
| rs832890    | 15 | 65166309  | T | C | 0.4655 | -0.026  | 0.0174 | 0.1349    | Yes | No  |
| rs7178615   | 15 | 66869072  | A | G | 0.3756 | -0.1371 | 0.018  | 2.90E-14  | Yes | No  |
| rs2289261   | 15 | 67457485  | C | G | 0.6524 | 0.0553  | 0.0183 | 0.002497  | Yes | No  |
| rs62004794  | 15 | 68454523  | A | G | 0.4394 | -0.0962 | 0.0174 | 3.38E-08  | Yes | No  |
| rs11853359  | 15 | 71621524  | A | G | 0.3324 | -0.166  | 0.0183 | 1.30E-19  | Yes | Yes |
| rs61653296  | 15 | 74557817  | A | G | 0.8008 | -0.1405 | 0.0218 | 1.13E-10  | Yes | No  |
| rs1378942   | 15 | 75077367  | A | C | 0.6688 | -0.388  | 0.0185 | 6.03E-98  | Yes | Yes |
| rs11634028  | 15 | 76276150  | A | T | 0.2149 | 0.1114  | 0.0216 | 2.52E-07  | Yes | Yes |
| rs62011052  | 15 | 79156983  | T | C | 0.8494 | 0.1467  | 0.0244 | 1.76E-09  | Yes | No  |
| rs2759308   | 15 | 81016227  | A | G | 0.4752 | 0.1409  | 0.0175 | 7.11E-16  | Yes | No  |
| rs2034618   | 15 | 83799632  | T | C | 0.2224 | -0.1157 | 0.0209 | 3.36E-08  | Yes | No  |

|             |    |           |   |   |        |         |        |           |     |     |
|-------------|----|-----------|---|---|--------|---------|--------|-----------|-----|-----|
| rs899927    | 15 | 84561879  | T | C | 0.3183 | -0.0282 | 0.0188 | 0.1339    | Yes | No  |
| rs7180952   | 15 | 85162551  | T | C | 0.5393 | -0.1008 | 0.0176 | 9.82E-09  | Yes | No  |
| rs3743157   | 15 | 85680532  | A | C | 0.1671 | 0.1284  | 0.0233 | 3.72E-08  | Yes | No  |
| rs11632436  | 15 | 86295286  | C | G | 0.5032 | 0.0996  | 0.0174 | 1.09E-08  | No  | No  |
| rs28611491  | 15 | 90641809  | T | C | 0.0808 | 0.0864  | 0.0332 | 0.00937   | Yes | No  |
| rs2521501   | 15 | 91437388  | A | T | 0.6747 | -0.3693 | 0.0191 | 1.84E-83  | No  | No  |
| rs873122    | 15 | 92702020  | C | G | 0.7196 | 0.121   | 0.0196 | 6.52E-10  | Yes | Yes |
| rs11632112  | 15 | 93468276  | C | G | 0.2405 | -0.0089 | 0.0204 | 0.6609    | Yes | No  |
| rs12906962  | 15 | 95312071  | T | C | 0.6767 | -0.2378 | 0.0188 | 8.73E-37  | Yes | Yes |
| rs4984496   | 15 | 96635898  | T | G | 0.3353 | 0.1763  | 0.0187 | 4.93E-21  | Yes | No  |
| rs34756251  | 15 | 100192540 | T | C | 0.1715 | -0.1386 | 0.023  | 1.75E-09  | Yes | No  |
| rs9932866   | 16 | 706067    | A | G | 0.3667 | 0.1154  | 0.0183 | 2.90E-10  | Yes | No  |
| rs11248862  | 16 | 1344291   | A | G | 0.126  | 0.0663  | 0.0266 | 0.01274   | Yes | No  |
| rs28590346  | 16 | 2080653   | A | T | 0.6596 | -0.1914 | 0.0191 | 9.84E-24  | Yes | No  |
| rs2379829   | 16 | 3538873   | C | G | 0.7307 | -0.148  | 0.0198 | 6.84E-14  | Yes | No  |
| rs4785955   | 16 | 4297651   | T | G | 0.2178 | -0.0342 | 0.0216 | 0.113     | Yes | No  |
| rs12921187  | 16 | 4943019   | T | G | 0.4283 | -0.175  | 0.0175 | 1.65E-23  | Yes | Yes |
| rs35450617  | 16 | 6889675   | T | G | 0.6997 | -0.079  | 0.0192 | 4.00E-05  | Yes | No  |
| rs11642631  | 16 | 11198835  | T | C | 0.5624 | 0.0069  | 0.0175 | 0.695     | Yes | No  |
| rs57327054  | 16 | 14487036  | T | C | 0.3081 | -0.1173 | 0.0191 | 8.07E-10  | Yes | No  |
| rs3915425   | 16 | 15912544  | T | C | 0.6822 | 0.0125  | 0.0188 | 0.505     | Yes | No  |
| rs4782211   | 16 | 19152219  | A | G | 0.271  | 0.1076  | 0.0208 | 2.45E-07  | No  | No  |
| rs13333226  | 16 | 20365654  | A | G | 0.8159 | 0.2965  | 0.0223 | 2.94E-40  | Yes | Yes |
| rs11639856  | 16 | 24788645  | A | T | 0.1936 | -0.1003 | 0.0219 | 4.59E-06  | Yes | No  |
| rs6565174   | 16 | 30111904  | A | C | 0.1126 | -0.195  | 0.0278 | 2.42E-12  | Yes | Yes |
| rs72799341  | 16 | 30936743  | A | G | 0.2398 | 0.1599  | 0.0204 | 4.92E-15  | Yes | No  |
| rs10468291  | 16 | 49768046  | A | C | 0.569  | -0.1166 | 0.0176 | 3.70E-11  | Yes | Yes |
| rs34941092  | 16 | 50550137  | A | G | 0.1498 | -0.1538 | 0.0245 | 3.42E-10  | Yes | No  |
| rs9932220   | 16 | 51758116  | A | G | 0.2177 | -0.1591 | 0.021  | 3.76E-14  | Yes | Yes |
| rs37060     | 16 | 58566304  | A | G | 0.2466 | -0.0341 | 0.0201 | 0.08935   | Yes | No  |
| rs28633979  | 16 | 65282820  | A | C | 0.4305 | 0.0198  | 0.0175 | 0.2574    | Yes | No  |
| rs45474499  | 16 | 66914492  | T | C | 0.0473 | 0.3562  | 0.0415 | 8.50E-18  | Yes | No  |
| rs7185555   | 16 | 69131281  | C | G | 0.1533 | -0.154  | 0.0243 | 2.34E-10  | Yes | No  |
| rs33063     | 16 | 69640217  | A | G | 0.149  | -0.0914 | 0.0244 | 0.0001827 | Yes | No  |
| rs62053102  | 16 | 71654365  | A | T | 0.9525 | 0.0322  | 0.0431 | 0.4554    | Yes | No  |
| rs1012089   | 16 | 74171973  | C | G | 0.475  | -0.0994 | 0.0174 | 1.19E-08  | No  | No  |
| rs35261357  | 16 | 75444572  | T | C | 0.5862 | 0.1216  | 0.0177 | 7.14E-12  | Yes | No  |
| rs56844452  | 16 | 80864776  | T | C | 0.0707 | -0.1193 | 0.0344 | 0.0005228 | Yes | No  |
| rs8059962   | 16 | 81574197  | T | C | 0.4208 | -0.1397 | 0.0177 | 3.38E-15  | Yes | No  |
| rs7500448   | 16 | 83045790  | A | G | 0.7471 | -0.1303 | 0.0202 | 1.14E-10  | Yes | No  |
| rs7187540   | 16 | 85318302  | A | C | 0.336  | -0.0914 | 0.0196 | 2.95E-06  | No  | No  |
| rs3851018   | 16 | 86437811  | C | G | 0.5694 | 0.0744  | 0.0178 | 3.06E-05  | No  | No  |
| rs6540125   | 16 | 87993889  | T | G | 0.3406 | 0.0888  | 0.0183 | 1.28E-06  | Yes | No  |
| rs1126464   | 16 | 89704365  | C | G | 0.2428 | 0.2071  | 0.0208 | 1.89E-23  | Yes | Yes |
| rs12941318  | 17 | 1333598   | T | C | 0.4952 | -0.0532 | 0.0178 | 0.002772  | Yes | No  |
| rs4480845   | 17 | 1958609   | T | C | 0.3646 | 0.0943  | 0.0183 | 2.41E-07  | Yes | No  |
| rs7215084   | 17 | 3880148   | T | C | 0.5127 | 0.1116  | 0.0173 | 1.17E-10  | Yes | Yes |
| rs28427409  | 17 | 6473882   | T | C | 0.4171 | -0.0066 | 0.0177 | 0.7071    | Yes | No  |
| rs78378222  | 17 | 7571752   | T | G | 0.986  | -0.6122 | 0.0798 | 1.71E-14  | Yes | No  |
| rs8069739   | 17 | 8078765   | T | C | 0.3213 | -0.0987 | 0.0186 | 1.04E-07  | Yes | No  |
| rs4925159   | 17 | 18185510  | A | G | 0.4253 | 0.1202  | 0.0176 | 8.26E-12  | Yes | No  |
| rs7502046   | 17 | 19196440  | T | C | 0.8108 | 0.1555  | 0.0224 | 3.95E-12  | Yes | No  |
| rs138285687 | 17 | 27195674  | T | C | 0.0434 | -0.0146 | 0.0436 | 0.7374    | No  | No  |
| rs11080134  | 17 | 29161503  | A | G | 0.6425 | -0.0955 | 0.0184 | 2.19E-07  | Yes | No  |
| rs1551355   | 17 | 30032420  | T | C | 0.2334 | 0.1185  | 0.0206 | 8.37E-09  | Yes | No  |
| rs9899540   | 17 | 30777924  | A | T | 0.3987 | 0.0679  | 0.0182 | 0.0001874 | Yes | No  |
| rs3135967   | 17 | 33313729  | A | G | 0.5242 | -0.0364 | 0.0174 | 0.03596   | Yes | No  |
| rs79089478  | 17 | 40317241  | T | C | 0.9726 | -0.058  | 0.0545 | 0.2871    | Yes | No  |
| rs56228409  | 17 | 40919596  | A | C | 0.8457 | 0.0452  | 0.0252 | 0.07296   | Yes | No  |
| rs9904409   | 17 | 42680402  | A | G | 0.0979 | 0.0796  | 0.0293 | 0.006556  | Yes | No  |
| rs12946454  | 17 | 43208121  | A | T | 0.7343 | -0.1614 | 0.0197 | 2.43E-16  | Yes | No  |
| rs115231027 | 17 | 44199290  | T | C | 0.8207 | -0.0904 | 0.0239 | 0.0001561 | No  | No  |
| rs17608766  | 17 | 45013271  | T | C | 0.8552 | -0.1707 | 0.0249 | 7.63E-12  | Yes | No  |
| rs62076103  | 17 | 45888374  | A | G | 0.9311 | -0.1437 | 0.0348 | 3.62E-05  | Yes | No  |
| rs7406910   | 17 | 46688256  | T | C | 0.0885 | -0.1426 | 0.0308 | 3.51E-06  | Yes | No  |
| rs12940887  | 17 | 47402807  | T | C | 0.3666 | 0.2279  | 0.018  | 9.63E-37  | Yes | Yes |
| rs12325702  | 17 | 55446364  | A | T | 0.4435 | -0.0287 | 0.0177 | 0.1048    | No  | No  |
| rs34430710  | 17 | 56876627  | A | T | 0.6769 | -0.1291 | 0.0186 | 3.81E-12  | Yes | No  |
| rs2645466   | 17 | 57853214  | A | C | 0.705  | -0.0275 | 0.019  | 0.1481    | Yes | No  |
| rs1036902   | 17 | 58950791  | T | C | 0.8478 | -0.1257 | 0.0244 | 2.72E-07  | Yes | No  |
| rs2240736   | 17 | 59485393  | T | C | 0.7347 | 0.189   | 0.0198 | 1.59E-21  | Yes | No  |
| rs740698    | 17 | 60767151  | T | C | 0.5642 | 0.0178  | 0.0178 | 0.3156    | Yes | No  |

|             |    |          |   |   |        |          |        |           |     |     |
|-------------|----|----------|---|---|--------|----------|--------|-----------|-----|-----|
| rs4308      | 17 | 61559625 | A | G | 0.3772 | 0.1753   | 0.0181 | 3.74E-22  | Yes | No  |
| rs6504213   | 17 | 62381714 | T | C | 0.4175 | -0.1335  | 0.018  | 1.17E-13  | Yes | No  |
| rs112260610 | 17 | 64252393 | T | C | 0.1407 | 0.1088   | 0.0251 | 1.41E-05  | Yes | No  |
| rs2467099   | 17 | 73949045 | T | C | 0.2233 | -0.1428  | 0.0209 | 7.58E-12  | Yes | No  |
| rs35504735  | 17 | 74686809 | A | G | 0.5578 | -0.0926  | 0.0174 | 1.06E-07  | Yes | No  |
| rs57927100  | 17 | 75317300 | C | G | 0.7366 | 0.206    | 0.02   | 7.34E-25  | Yes | No  |
| rs9302885   | 17 | 76799898 | A | G | 0.4454 | 0.0976   | 0.0174 | 2.13E-08  | Yes | No  |
| rs112280096 | 17 | 79367409 | A | C | 0.362  | -0.1186  | 0.0192 | 6.95E-10  | No  | No  |
| rs34413141  | 18 | 777282   | A | T | 0.1821 | -0.1808  | 0.0227 | 1.49E-15  | Yes | No  |
| rs11665020  | 18 | 10879503 | C | G | 0.322  | -0.1423  | 0.0187 | 2.78E-14  | Yes | No  |
| rs963920    | 18 | 12711052 | T | G | 0.6751 | 0.0126   | 0.0185 | 0.4959    | Yes | No  |
| rs4800420   | 18 | 20158965 | A | G | 0.2911 | 0.1192   | 0.0192 | 5.18E-10  | Yes | Yes |
| rs1154214   | 18 | 24546824 | T | G | 0.3963 | -0.1064  | 0.0177 | 1.77E-09  | Yes | No  |
| rs10164193  | 18 | 31161426 | T | G | 0.9223 | -0.2196  | 0.0327 | 1.87E-11  | Yes | No  |
| rs61735998  | 18 | 34289285 | T | G | 0.0242 | 0.0894   | 0.0592 | 0.1313    | Yes | No  |
| rs12958173  | 18 | 42141977 | A | C | 0.2967 | 0.1704   | 0.019  | 2.99E-19  | Yes | No  |
| rs7236548   | 18 | 43097750 | A | C | 0.1847 | -0.0285  | 0.0224 | 0.2031    | Yes | No  |
| rs745821    | 18 | 48142854 | T | G | 0.7551 | 0.1544   | 0.0203 | 2.71E-14  | Yes | No  |
| rs36010659  | 18 | 48283949 | T | C | 0.8585 | 0.0476   | 0.0249 | 0.05604   | Yes | No  |
| rs11876341  | 18 | 48799991 | A | G | 0.692  | -0.1202  | 0.0193 | 4.35E-10  | Yes | No  |
| rs34163044  | 18 | 51851616 | A | C | 0.42   | 0.1486   | 0.0179 | 9.63E-17  | Yes | No  |
| rs72930904  | 18 | 52607301 | T | C | 0.16   | -0.14    | 0.0237 | 3.24E-09  | Yes | No  |
| rs12605156  | 18 | 53498114 | A | T | 0.8084 | 0.1418   | 0.0221 | 1.51E-10  | Yes | Yes |
| rs10048404  | 18 | 54578482 | T | C | 0.3694 | -0.1096  | 0.0183 | 2.01E-09  | No  | No  |
| rs7235890   | 18 | 55732115 | T | G | 0.8956 | -0.1692  | 0.0288 | 4.12E-09  | Yes | No  |
| rs6567160   | 18 | 57829135 | T | C | 0.7663 | 0.0852   | 0.0206 | 3.58E-05  | Yes | No  |
| rs12172847  | 18 | 60223017 | A | G | 0.3233 | -0.0141  | 0.0185 | 0.4456    | Yes | No  |
| rs12454712  | 18 | 60845884 | T | C | 0.6223 | 0.1047   | 0.0188 | 2.73E-08  | No  | No  |
| rs10460108  | 18 | 73034151 | A | G | 0.48   | 0.1038   | 0.0174 | 2.35E-09  | Yes | No  |
| rs1047922   | 18 | 74070562 | T | C | 0.8482 | 0.0215   | 0.0252 | 0.3926    | No  | No  |
| rs7250835   | 19 | 670234   | T | C | 0.1646 | 0.0333   | 0.0247 | 0.1784    | Yes | No  |
| rs3760994   | 19 | 1435771  | A | G | 0.492  | -0.042   | 0.0183 | 0.02183   | No  | No  |
| rs740406    | 19 | 2232221  | A | G | 0.9403 | -0.0836  | 0.0379 | 0.02741   | Yes | No  |
| rs2656523   | 19 | 4085896  | C | G | 0.7736 | -0.0122  | 0.0213 | 0.5679    | Yes | No  |
| rs2613765   | 19 | 5066330  | A | G | 0.4745 | -0.0976  | 0.0174 | 1.98E-08  | Yes | No  |
| rs7248104   | 19 | 7224431  | A | G | 0.4129 | -0.0514  | 0.0177 | 0.003604  | Yes | No  |
| rs4247374   | 19 | 7252756  | T | C | 0.1397 | -0.3616  | 0.0262 | 3.35E-43  | No  | No  |
| rs2009733   | 19 | 8398714  | A | G | 0.4995 | 0.1217   | 0.0176 | 5.10E-12  | Yes | No  |
| rs10409243  | 19 | 10332988 | T | C | 0.5911 | -0.1199  | 0.018  | 2.89E-11  | Yes | No  |
| rs1529744   | 19 | 10841472 | T | C | 0.3185 | -0.04    | 0.0187 | 0.03217   | Yes | No  |
| rs167479    | 19 | 11526765 | T | G | 0.4722 | -0.362   | 0.0188 | 1.67E-82  | No  | No  |
| rs17638167  | 19 | 11584818 | T | C | 0.0437 | -0.256   | 0.0429 | 2.35E-09  | Yes | No  |
| rs10418305  | 19 | 15278808 | C | G | 0.0989 | 0.1341   | 0.0292 | 4.36E-06  | Yes | No  |
| rs3745318   | 19 | 16436262 | T | C | 0.2496 | 0.1396   | 0.0206 | 1.30E-11  | No  | No  |
| rs1077795   | 19 | 17222584 | A | G | 0.7389 | 0.1987   | 0.0199 | 1.62E-23  | Yes | No  |
| rs8111708   | 19 | 18558876 | A | G | 0.6523 | -0.0807  | 0.0183 | 9.85E-06  | Yes | No  |
| rs2304130   | 19 | 19789528 | A | G | 0.9156 | -0.2396  | 0.0318 | 4.48E-14  | Yes | No  |
| rs6511291   | 19 | 21950402 | T | C | 0.436  | -0.1158  | 0.0177 | 6.89E-11  | Yes | Yes |
| rs62104477  | 19 | 30294991 | T | G | 0.3302 | 0.1703   | 0.0185 | 4.22E-20  | Yes | No  |
| rs8105753   | 19 | 31927547 | A | C | 0.632  | 0.109    | 0.0183 | 2.71E-09  | No  | No  |
| rs1821295   | 19 | 32590773 | T | C | 0.6985 | -0.138   | 0.0189 | 3.13E-13  | Yes | No  |
| rs7256564   | 19 | 33889593 | A | G | 0.3124 | 0.0787   | 0.0187 | 2.56E-05  | Yes | No  |
| rs12983238  | 19 | 39438532 | A | G | 0.307  | -0.1266  | 0.0201 | 3.23E-10  | Yes | No  |
| rs1800470   | 19 | 41858921 | A | G | 0.6242 | 0.0428   | 0.0181 | 0.01781   | Yes | No  |
| rs7412      | 19 | 45412079 | T | C | 0.0817 | -0.0635  | 0.0331 | 0.05489   | Yes | No  |
| rs34783010  | 19 | 46180414 | T | G | 0.1992 | 0.0212   | 0.022  | 0.3351    | Yes | No  |
| rs73046792  | 19 | 49605705 | A | G | 0.1592 | -0.1518  | 0.0245 | 5.87E-10  | Yes | No  |
| rs138877676 | 19 | 50935809 | T | G | 0.0193 | -0.2026  | 0.0712 | 0.004407  | Yes | No  |
| rs2143635   | 20 | 2793063  | T | C | 0.8995 | 0.0718   | 0.0296 | 0.01531   | Yes | No  |
| rs1764975   | 20 | 4101290  | A | T | 0.7956 | 0.1609   | 0.0219 | 1.88E-13  | Yes | No  |
| rs11087740  | 20 | 6657554  | T | C | 0.5123 | 7.00E-04 | 0.0175 | 0.9667    | Yes | No  |
| rs6108168   | 20 | 8626271  | A | C | 0.2546 | -0.1901  | 0.0199 | 1.10E-21  | Yes | No  |
| rs680515    | 20 | 10458688 | A | G | 0.3897 | 0.1723   | 0.0179 | 5.61E-22  | Yes | No  |
| rs1327235   | 20 | 10969030 | A | G | 0.5286 | -0.3018  | 0.0173 | 4.76E-68  | Yes | No  |
| rs1232482   | 20 | 11886643 | T | C | 0.4019 | -0.1214  | 0.0176 | 6.10E-12  | Yes | No  |
| rs2618647   | 20 | 17882452 | A | G | 0.5068 | -0.1216  | 0.0174 | 2.70E-12  | Yes | No  |
| rs6081613   | 20 | 19465907 | A | G | 0.2748 | -0.1111  | 0.0194 | 1.00E-08  | Yes | No  |
| rs6060114   | 20 | 30169673 | T | C | 0.8417 | 0.1689   | 0.0238 | 1.41E-12  | Yes | No  |
| rs6141767   | 20 | 31225069 | C | G | 0.1568 | 0.1048   | 0.0241 | 1.41E-05  | Yes | No  |
| rs13042148  | 20 | 32298286 | T | C | 0.1537 | -0.1674  | 0.0244 | 7.24E-12  | Yes | No  |
| rs6141479   | 20 | 33121942 | C | G | 0.1961 | -0.0469  | 0.0226 | 0.03812   | Yes | No  |
| rs4811601   | 20 | 36849007 | T | C | 0.4589 | -0.0669  | 0.0177 | 0.0001523 | Yes | No  |

|            |    |          |   |   |        |         |        |           |     |     |
|------------|----|----------|---|---|--------|---------|--------|-----------|-----|-----|
| rs4810332  | 20 | 40268334 | A | T | 0.3795 | -0.1715 | 0.0183 | 6.51E-21  | Yes | No  |
| rs6031435  | 20 | 42797358 | A | G | 0.5399 | -0.1128 | 0.0175 | 1.10E-10  | Yes | No  |
| rs6095241  | 20 | 47308798 | A | G | 0.4396 | -0.1358 | 0.0174 | 6.22E-15  | Yes | Yes |
| rs237485   | 20 | 48004238 | A | G | 0.6976 | 0.1124  | 0.0191 | 3.63E-09  | Yes | Yes |
| rs6021247  | 20 | 50108980 | A | G | 0.5289 | 0.1297  | 0.0174 | 8.21E-14  | Yes | No  |
| rs6015450  | 20 | 57751117 | A | G | 0.8762 | -0.4911 | 0.0266 | 5.37E-76  | Yes | Yes |
| rs35213536 | 20 | 62694319 | T | G | 0.2467 | 0.2044  | 0.0205 | 2.54E-23  | Yes | No  |
| rs1882961  | 21 | 16556367 | T | C | 0.3088 | 0.1272  | 0.0188 | 1.40E-11  | Yes | No  |
| rs11909120 | 21 | 30131872 | A | T | 0.8565 | 0.121   | 0.0248 | 1.06E-06  | Yes | No  |
| rs11701033 | 21 | 33788341 | C | G | 0.818  | -0.1072 | 0.0227 | 2.24E-06  | Yes | No  |
| rs9976596  | 21 | 35596842 | T | C | 0.8433 | -0.112  | 0.0244 | 4.59E-06  | Yes | No  |
| rs62229372 | 21 | 37692507 | T | C | 0.1276 | 0.1413  | 0.027  | 1.66E-07  | Yes | No  |
| rs2277788  | 21 | 40817702 | C | G | 0.1059 | 0.0359  | 0.0282 | 0.2023    | Yes | No  |
| rs12627651 | 21 | 44760603 | A | G | 0.2866 | 0.215   | 0.0197 | 7.86E-28  | Yes | Yes |
| rs9306160  | 21 | 45107562 | T | C | 0.4113 | -0.1435 | 0.0178 | 8.67E-16  | Yes | No  |
| rs35796750 | 21 | 47422412 | T | C | 0.5496 | -0.0054 | 0.0176 | 0.7597    | Yes | No  |
| rs11701512 | 21 | 47962811 | A | G | 0.1809 | 0.023   | 0.0225 | 0.3076    | Yes | No  |
| rs12628032 | 22 | 19967980 | T | C | 0.309  | 0.0229  | 0.019  | 0.2266    | Yes | No  |
| rs134041   | 22 | 28056338 | T | C | 0.436  | 0.1223  | 0.0175 | 3.05E-12  | Yes | Yes |
| rs9608690  | 22 | 28921347 | A | G | 0.0685 | -0.1321 | 0.0346 | 0.0001339 | Yes | No  |
| rs4823006  | 22 | 29451671 | A | G | 0.5549 | 0.1396  | 0.0174 | 1.17E-15  | Yes | Yes |
| rs737721   | 22 | 30172254 | C | G | 0.9482 | -0.1144 | 0.0397 | 0.003903  | Yes | No  |
| rs5753103  | 22 | 30768777 | A | G | 0.4515 | -0.0082 | 0.0175 | 0.639     | Yes | No  |
| rs9609429  | 22 | 32517431 | T | C | 0.7236 | 0.1203  | 0.0195 | 6.32E-10  | Yes | Yes |
| rs5750482  | 22 | 38117943 | T | C | 0.3799 | 0.0312  | 0.0179 | 0.08182   | Yes | No  |
| rs470113   | 22 | 40729614 | A | G | 0.8184 | 0.0476  | 0.0225 | 0.03445   | Yes | No  |
| rs73161324 | 22 | 42038786 | T | C | 0.056  | -0.1327 | 0.0403 | 0.001004  | Yes | No  |
| rs77692990 | 22 | 50219952 | T | C | 0.0798 | -0.1088 | 0.0326 | 0.0008343 | Yes | No  |
| rs28578714 | 22 | 50727921 | T | C | 0.6064 | 0.0814  | 0.0188 | 1.46E-05  | Yes | No  |



59 **Supplemental Table 9.** Number of genetic variants used in all analyses

60

|                          | <b>Genetic variants<br/>in original<br/>GWAS (<i>n</i>, %)</b> | <b>Used in main<br/>MR analyses<br/>(<i>n</i>, %)</b> | <b>Used in MR<br/>+ Steiger filt.<br/>(<i>n</i>, %)</b> |
|--------------------------|----------------------------------------------------------------|-------------------------------------------------------|---------------------------------------------------------|
| Fasting glucose          | 138 (100%)                                                     | 121 (87.7%)                                           | 67 (48.6%)                                              |
| Glycated hemoglobin      | 146 (100%)                                                     | 124 (84.9%)                                           | 47 (32.2%)                                              |
| Fasting insulin          | 62 (100%)                                                      | 56 (90.3%)                                            | 30 (48.4%)                                              |
| LDL cholesterol          | 389 (100%)                                                     | 311 (79.9%)                                           | 72 (18.5%)                                              |
| HDL cholesterol          | 371 (100%)                                                     | 311 (83.8%)                                           | 34 (9.2%)                                               |
| Triglycerides            | 384 (100%)                                                     | 322 (83.9%)                                           | 31 (8.1%)                                               |
| Systolic blood pressure  | 883 (100%)                                                     | 817 (92.5%)                                           | 83 (9.4%)                                               |
| Diastolic blood pressure | 885 (100%)                                                     | 818 (92.4%)                                           | 114 (12.9%)                                             |

61

62 **Supplemental Table 10.** Sensitivity analyses on the verification of Mendelian randomization assumptions.

63

|                                | Main MR analyses<br>(inverse variance<br>weighted method;<br>(OR, 95% CI) | Estimated<br>F-statistic | MR-Egger<br>intercept<br>test<br>(p-value) | Between-SNP heterogeneity |                   | Sensitivity MR methods   |                                    |                                  | Steiger filtering                                   |
|--------------------------------|---------------------------------------------------------------------------|--------------------------|--------------------------------------------|---------------------------|-------------------|--------------------------|------------------------------------|----------------------------------|-----------------------------------------------------|
|                                |                                                                           |                          |                                            | Cochran's Q               | Rücker's Q'       | MR-Egger<br>(OR, 95% CI) | Weighted<br>median<br>(OR, 95% CI) | Weighted<br>mode<br>(OR, 95% CI) | Inverse variance<br>weighted method<br>(OR, 95% CI) |
| Fasting glucose<br>Women       | 1.14<br>(0.99 to 1.33)                                                    | 174                      | 0.517                                      | 163<br>(p=0.006)          | 162<br>(p=0.005)  | 1.07<br>(0.83 to 1.38)   | 1.24<br>(1.01 to 1.51)             | 1.23<br>(0.98 to 1.53)           | 1.09<br>(0.90 to 1.32)                              |
| Fasting glucose<br>Men         | 1.06<br>(0.91 to 1.24)                                                    | 174                      | 0.599                                      | 106<br>(p=0.821)          | 105<br>(p=0.809)  | 1.01<br>(0.78 to 1.30)   | 1.15<br>(0.91 to 1.45)             | 1.12<br>(0.90 to 1.39)           | 1.06<br>(0.88 to 1.28)                              |
| Glycated hemoglobin<br>Women   | 1.14<br>(0.92 to 1.41)                                                    | 151                      | 0.426                                      | 137<br>(p=0.187)          | 136<br>(p=0.182)  | 1.28<br>(0.90 to 1.82)   | 1.26<br>(0.91 to 1.76)             | 1.13<br>(0.79 to 1.61)           | 1.30<br>(0.90 to 1.90)                              |
| Glycated hemoglobin<br>Men     | 0.98<br>(0.77 to 1.24)                                                    | 151                      | 0.943                                      | 122<br>(p=0.509)          | 122<br>(p=0.483)  | 0.97<br>(0.65 to 1.44)   | 0.94<br>(0.64 to 1.37)             | 1.00<br>(0.69 to 1.45)           | 0.90<br>(0.52 to 1.54)                              |
| Fasting insulin<br>Women       | 1.60<br>(1.17 to 2.18)                                                    | 52.5                     | 0.194                                      | 55.8<br>(p=0.445)         | 54.1<br>(p=0.472) | 2.94<br>(1.12 to 7.69)   | 1.46<br>(0.93 to 2.28)             | 1.45<br>(0.71 to 2.95)           | 1.57<br>(0.98 to 2.52)                              |
| Fasting insulin<br>Men         | 1.20<br>(0.80 to 1.80)                                                    | 52.5                     | 0.190                                      | 66.7<br>(p=0.135)         | 64.5<br>(p=0.154) | 2.68<br>(0.77 to 9.41)   | 1.53<br>(0.87 to 2.68)             | 3.18<br>(1.16 to 8.71)           | 1.06<br>(0.59 to 1.91)                              |
| LDL cholesterol<br>Women       | 0.98<br>(0.91 to 1.05)                                                    | 4.50 × 10 <sup>8</sup>   | 0.298                                      | 312<br>(p=0.462)          | 311<br>(p=0.464)  | 1.01<br>(0.92 to 1.10)   | 1.00<br>(0.89 to 1.12)             | 0.99<br>(0.91 to 1.09)           | 1.00<br>(0.86 to 1.17)                              |
| LDL cholesterol<br>Men         | 0.96<br>(0.88 to 1.05)                                                    | 4.50 × 10 <sup>8</sup>   | 0.162                                      | 311<br>(p=0.473)          | 309<br>(p=0.489)  | 0.91<br>(0.82 to 1.02)   | 0.86<br>(0.75 to 0.99)             | 0.91<br>(0.82 to 1.01)           | 1.02<br>(0.85 to 1.22)                              |
| HDL cholesterol<br>Women       | 1.02<br>(0.95 to 1.10)                                                    | 3.79 × 10 <sup>8</sup>   | 0.298                                      | 295<br>(p=0.712)          | 294<br>(p=0.714)  | 1.06<br>(0.96 to 1.18)   | 1.09<br>(0.94 to 1.26)             | 1.06<br>(0.94 to 1.18)           | 1.08<br>(0.88 to 1.34)                              |
| HDL cholesterol<br>Men         | 0.99<br>(0.90 to 1.09)                                                    | 3.79 × 10 <sup>8</sup>   | 0.996                                      | 358<br>(p=0.031)          | 358<br>(p=0.028)  | 0.99<br>(0.86 to 1.14)   | 0.96<br>(0.81 to 1.15)             | 1.00<br>(0.87 to 1.16)           | 1.08<br>(0.86 to 1.36)                              |
| Triglycerides<br>Women         | 1.00<br>(0.92 to 1.09)                                                    | 3.35 × 10 <sup>8</sup>   | <0.001                                     | 350<br>(p=0.129)          | 335<br>(p=0.274)  | 0.85<br>(0.76 to 0.96)   | 0.93<br>(0.82 to 1.07)             | 0.92<br>(0.82 to 1.03)           | 0.97<br>(0.72 to 1.32)                              |
| Triglycerides<br>Men           | 1.04<br>(0.93 to 1.15)                                                    | 3.35 × 10 <sup>8</sup>   | 0.872                                      | 383<br>(p=0.010)          | 383<br>(p=0.009)  | 1.03<br>(0.88 to 1.20)   | 0.98<br>(0.82 to 1.18)             | 1.02<br>(0.88 to 1.17)           | 0.90<br>(0.63 to 1.31)                              |
| Systolic blood pres.<br>Women  | 1.00<br>(1.00 to 1.01)                                                    | 46.1                     | 0.824                                      | 817<br>(p=0.486)          | 817<br>(p=0.476)  | 1.00<br>(0.99 to 1.02)   | 1.00<br>(0.99 to 1.01)             | 1.01<br>(0.98 to 1.05)           | 0.99<br>(0.98 to 1.01)                              |
| Systolic blood pres.<br>Men    | 1.00<br>(0.99 to 1.00)                                                    | 46.1                     | 0.846                                      | 850<br>(p=0.202)          | 849<br>(p=0.195)  | 1.00<br>(0.98 to 1.01)   | 0.99<br>(0.98 to 1.01)             | 0.99<br>(0.81 to 1.21)           | 1.00<br>(0.98 to 1.01)                              |
| Diastolic blood pres.<br>Women | 1.01<br>(1.00 to 1.01)                                                    | 45.2                     | 0.584                                      | 819<br>(p=0.470)          | 819<br>(p=0.463)  | 1.01<br>(0.99 to 1.03)   | 1.01<br>(0.99 to 1.02)             | 1.01<br>(0.99 to 1.02)           | 1.00<br>(0.98 to 1.02)                              |
| Diastolic blood pres.<br>Men   | 0.99<br>(0.98 to 1.00)                                                    | 45.2                     | 0.192                                      | 849<br>(p=0.216)          | 847<br>(p=0.221)  | 0.98<br>(0.96 to 1.00)   | 0.98<br>(0.96 to 1.00)             | 0.98<br>(0.96 to 1.00)           | 0.98<br>(0.96 to 1.00)                              |

64

65 **SUPPLEMENTAL FIGURES**

66

67 **Supplemental Figure 1.** Study flow chart.

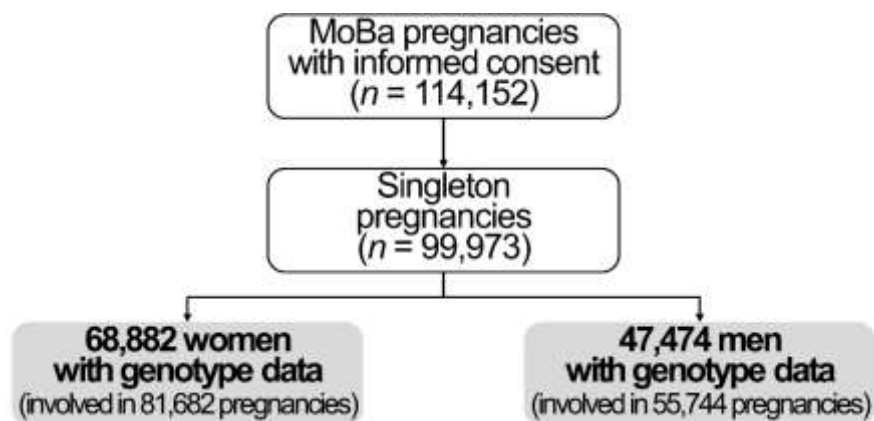

68

69 **SUPPLEMENTAL REFERENCES**

70

71 [1] Burgess S, Davey Smith G, Davies NM, et al. (2019) Guidelines for performing

72 Mendelian randomization investigations. Wellcome Open Res 4: 186.

73 10.12688/wellcomeopenres.15555.2

74 [2] Wang C, Zhan X, Liang L, Abecasis GR, Lin X (2015) Improved ancestry estimation

75 for both genotyping and sequencing data using projection procrustes analysis and genotype

76 imputation. Am J Hum Genet 96(6): 926-937. 10.1016/j.ajhg.2015.04.018

77 [3] Davey Smith G, Hemani G (2014) Mendelian randomization: genetic anchors for

78 causal inference in epidemiological studies. Hum Mol Genet 23(R1): R89-98.

79 10.1093/hmg/ddu328

80 [4] Hemani G, Bowden J, Davey Smith G (2018) Evaluating the potential role of

81 pleiotropy in Mendelian randomization studies. Hum Mol Genet 27(R2): R195-r208.

82 10.1093/hmg/ddy163
